# Supplementary material for: Hypertrophic chondrocytes serve as a reservoir for marrow-associated skeletal stem and progenitor cells, osteoblasts, and adipocytes during skeletal development
Source: eLife journal article supplement (doi:10.7554/elife.76932), 2022-02-18
Supplement: supp [file elife-76932-supp-v1.zip]

Archive with 27 entries (27 files):
- elife_poa_e76932_Figure_1_figure_supplement_1.pdf
- elife_poa_e76932_Figure_2_figure_supplement_1.pdf
- elife_poa_e76932_Figure_2_figure_supplement_2.pdf
- elife_poa_e76932_Figure_3_figure_supplement_1.pdf
- elife_poa_e76932_Figure_4_figure_supplement_1.pdf
- elife_poa_e76932_Figure_4_figure_supplement_2.pdf
- elife_poa_e76932_Figure_4_figure_supplement_3.pdf
- elife_poa_e76932_Figure_4_figure_supplement_4.pdf
- elife_poa_e76932_Figure_5_figure_supplement_1.pdf
- elife_poa_e76932_Figure_8_figure_supplement_1.pdf
- elife_poa_e76932_Source_code_1.pdf
- elife_poa_e76932_Transparent_Reporting_File.pdf
- elife_poa_e76932_Figure_1_source_data_1.xlsx
- elife_poa_e76932_Figure_3_source_data_1.xlsx
- elife_poa_e76932_Figure_3_figure_supplement_1_source_data_1.xlsx
- elife_poa_e76932_Figure_3_figure_supplement_1_source_data_2.xlsx
- elife_poa_e76932_Figure_3_figure_supplement_1_source_data_3.xlsx
- elife_poa_e76932_Figure_5_figure_supplement_1_source_data_1.xlsx
- elife_poa_e76932_Figure_5_figure_supplement_1_source_data_2.xlsx
- elife_poa_e76932_Figure_6_source_data_1.xlsx
- elife_poa_e76932_Figure_7_source_data_1.xlsx
- elife_poa_e76932_Figure_7_source_data_2.xlsx
- elife_poa_e76932_Figure_7_source_data_3.xlsx
- elife_poa_e76932_Figure_7_source_data_4.xlsx
- elife_poa_e76932_Figure_7_source_data_5.xlsx
- elife_poa_e76932_Figure_7_source_data_6.xlsx
- elife_poa_e76932_Figure_8_figure_supplement_1_source_data_1.xlsx
