# Supplementary material for: Hypertrophic chondrocytes serve as a reservoir for marrow-associated skeletal stem and progenitor cells, osteoblasts, and adipocytes during skeletal development
Source: eLife journal article supplement (doi:10.7554/elife.76932), 2022-02-18

*Col10a1Cre<sup>ERT2</sup>; Rosa26<sup>fs-tdTomato</sup>*

*Col10a1Cre*

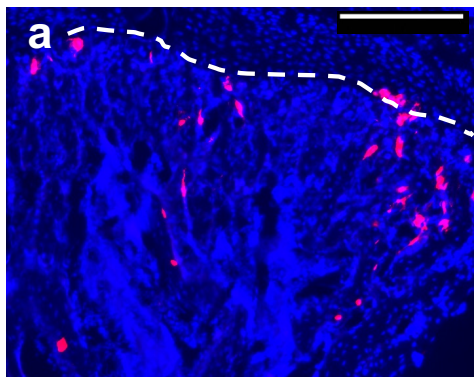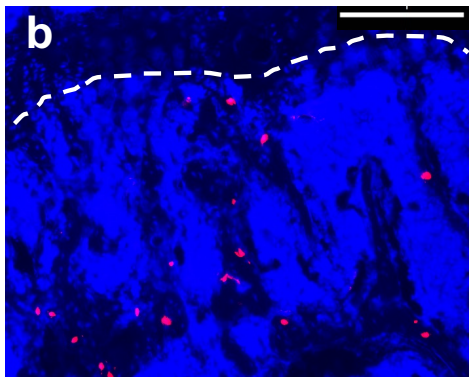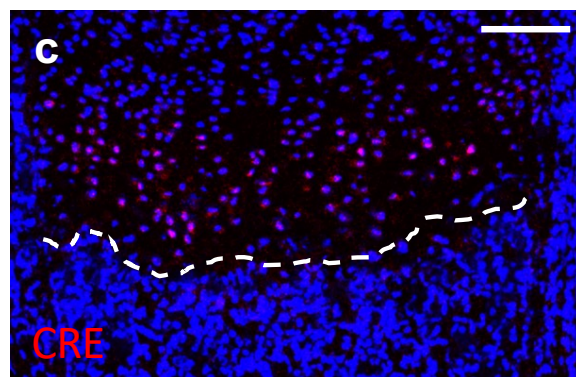

TM @ 2M  
2-week chase

TM @ 4M  
4-week chase

P0

*Col10a1Cre; Rosa26<sup>fs-tdTomato</sup>*

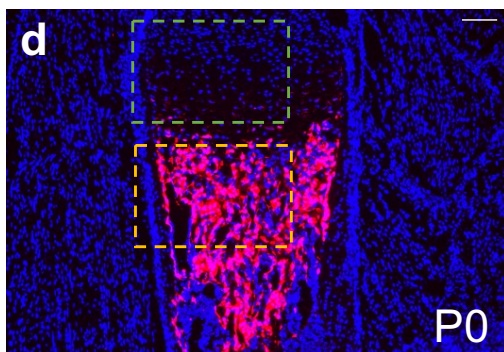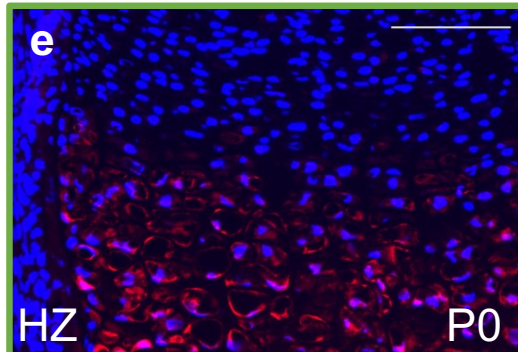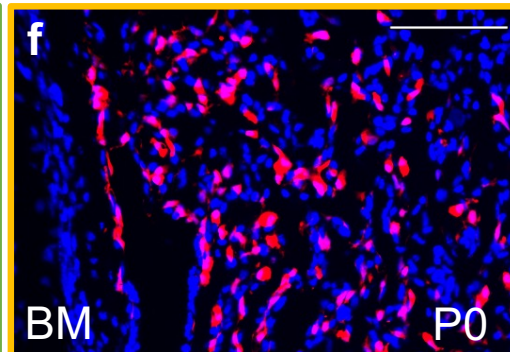

Supplement: supp [file elife-76932-supp-v1.zip › elife_poa_e76932_Figure_1_figure_supplement_1.pdf]
