# Supplementary material for: Hypertrophic chondrocytes serve as a reservoir for marrow-associated skeletal stem and progenitor cells, osteoblasts, and adipocytes during skeletal development
Source: eLife journal article supplement (doi:10.7554/elife.76932), 2022-02-18
Supplement: supp [file elife-76932-supp-v1.zip › elife_poa_e76932_Figure_1_source_data_1.xlsx]

## Sheet: Sheet1
2M ColX Tomato	400x400 adjacent to growth plate	20x image
Slide Number		Tomato bone lining	OCN+Tom+	OCN+ Tom-	Total Osteocytes	Tom+ osteocytes			OCN+T+/total OCN+		Percent T+/Total osteocytes
3396-1		52	27	3	27	15			0.9		0.555556
3396-2		46	37	15	39	23			0.711538		0.589744
3396-3		45	34	8	42	34			0.809524		0.809524
3402-1		72	38	3	71	52			0.926829		0.732394
3402-2		49	38	4	33	18			0.904762		0.545455
3402-3		51	40	10	45	26			0.8		0.577778
3404-1		27	15	8	21	20			0.652174		0.952381
3404-2		39	36	4	20	17			0.9		0.85
3404-3		50	34	4	30	19			0.894737		0.633333
						OCN+T+/total OCN+		Percent T+/Total osteocytes
				AVG.		0.833285		0.694018
				St.dev s		0.0973611		0.147989
				Confidence interval		0.0748384		0.113755
