# Supplementary material for: Hypertrophic chondrocytes serve as a reservoir for marrow-associated skeletal stem and progenitor cells, osteoblasts, and adipocytes during skeletal development
Source: eLife journal article supplement (doi:10.7554/elife.76932), 2022-02-18

**a**

E16.5 Hypertrophic Region  
Col10a1Cre; *Rosa26<sup>fs-tdTomato</sup>*

Gate: Single Live Cells

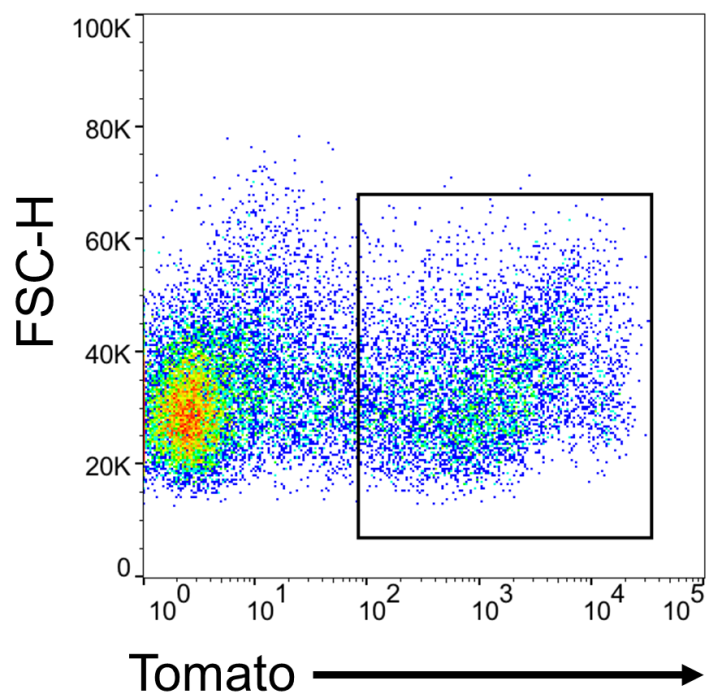

**b**

2M Bone Marrow  
Col10a1Cre; *Rosa26<sup>fs-tdTomato</sup>*

Gate: Single Live Cells

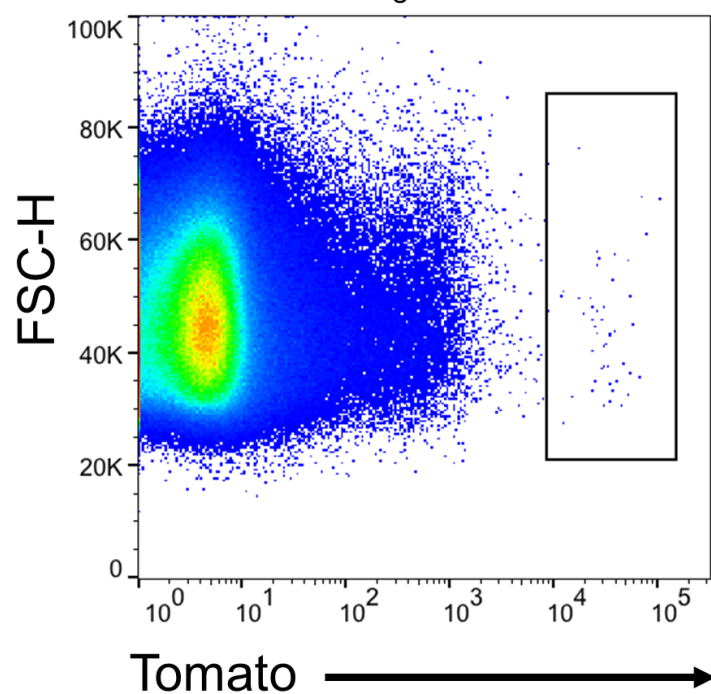

Supplement: supp [file elife-76932-supp-v1.zip › elife_poa_e76932_Figure_2_figure_supplement_1.pdf]
