# Supplementary material for: Hypertrophic chondrocytes serve as a reservoir for marrow-associated skeletal stem and progenitor cells, osteoblasts, and adipocytes during skeletal development
Source: eLife journal article supplement (doi:10.7554/elife.76932), 2022-02-18

a

*Col10a1Cre<sup>ERT2</sup>; Rosa26<sup>fs-tdTomato</sup>* (Tamoxifen @ P6)

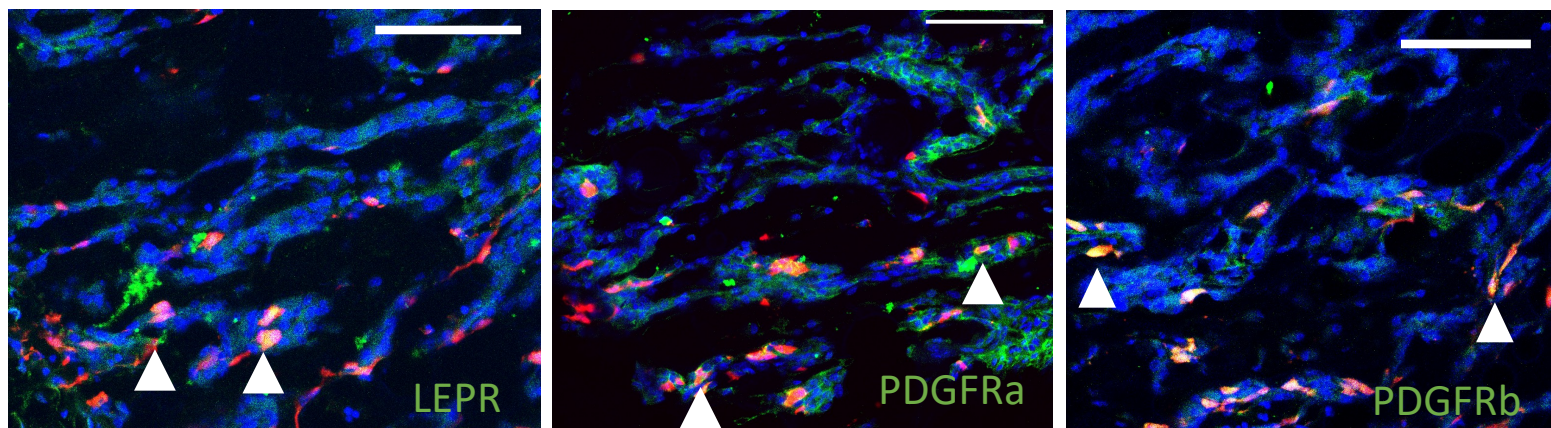

2-week chase

b

2-month-old *Col10a1Cre; Rosa26<sup>fs-tdTomato</sup>*

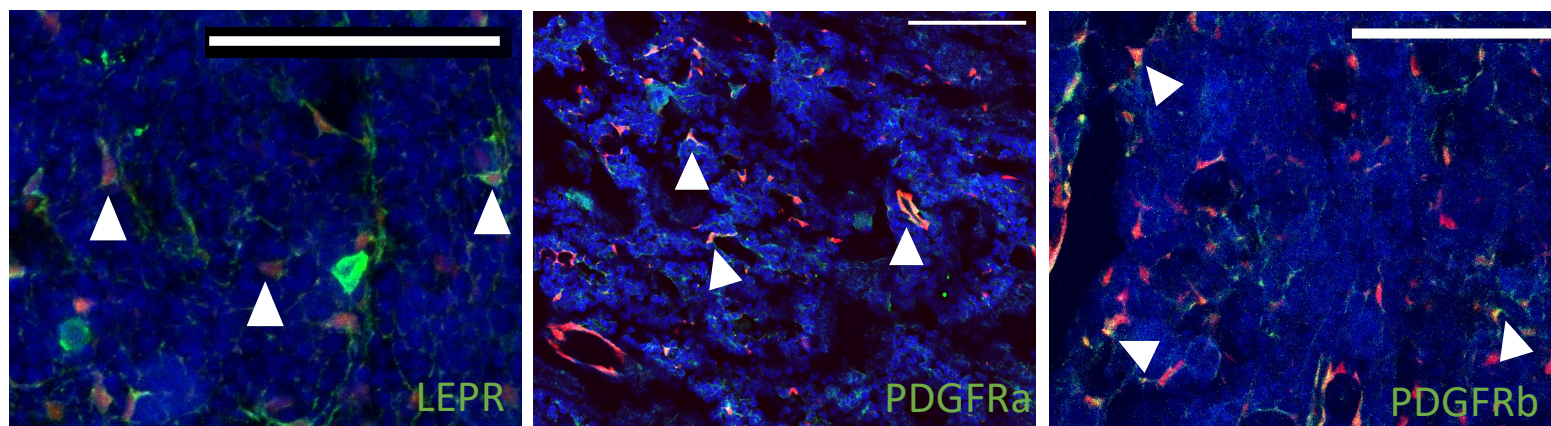

c

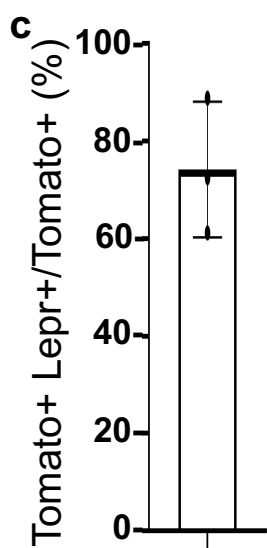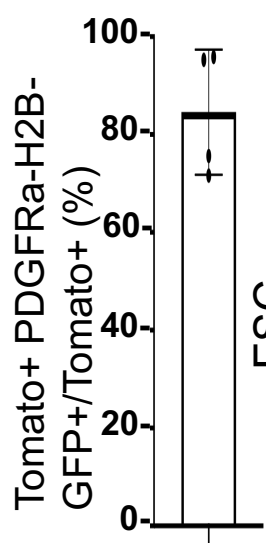

Gate: CD31-  
/CD45-/Ter119-  
ColX;TdT+ Live  
Single Cells

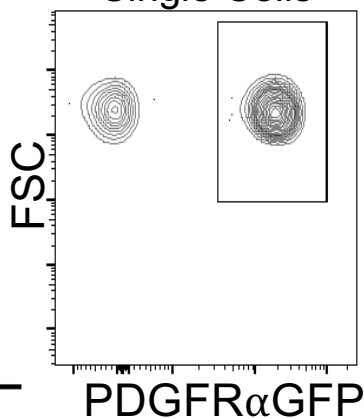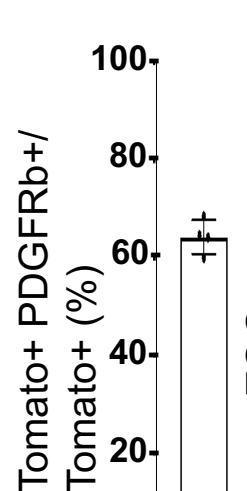

Gate: CD31-  
/CD45-/Ter119-  
ColX;TdT+ Live

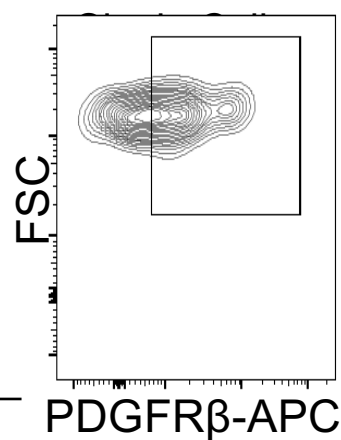

Supplement: supp [file elife-76932-supp-v1.zip › elife_poa_e76932_Figure_3_figure_supplement_1.pdf]
