# Supplementary material for: Hypertrophic chondrocytes serve as a reservoir for marrow-associated skeletal stem and progenitor cells, osteoblasts, and adipocytes during skeletal development
Source: eLife journal article supplement (doi:10.7554/elife.76932), 2022-02-18
Supplement: supp [file elife-76932-supp-v1.zip › elife_poa_e76932_Figure_3_figure_supplement_1_source_data_1.xlsx]

## Sheet: Sheet1
Animal #	425um x 425um
	Lepr+Tom+	Tom+ Total
1	82	134	0.61194
2	112	126	0.888889
3	74	102	0.72549
		Average	0.742106
		St.Dev	0.13922
		Confidence	0.345842
