# Supplementary material for: Hypertrophic chondrocytes serve as a reservoir for marrow-associated skeletal stem and progenitor cells, osteoblasts, and adipocytes during skeletal development
Source: eLife journal article supplement (doi:10.7554/elife.76932), 2022-02-18
Supplement: supp [file elife-76932-supp-v1.zip › elife_poa_e76932_Figure_3_figure_supplement_1_source_data_3.xlsx]

## Sheet: Sheet1
Depth	Name	Statistic	#Cells
	ColXTMT BMSC with PDGFRbAPC_1 male_008.fcs		3896130
>	ColXTMT BMSC with PDGFRbAPC_1 male_008.fcs/Cells	100	3895333
> >	ColXTMT BMSC with PDGFRbAPC_1 male_008.fcs/Cells/Single Cells	90.1	3511082
> > >	ColXTMT BMSC with PDGFRbAPC_1 male_008.fcs/Cells/Single Cells/Comp-Alexa Fluor 405-A+	23.5	825813
> > >	ColXTMT BMSC with PDGFRbAPC_1 male_008.fcs/Cells/Single Cells/Comp-Alexa Fluor 405-A-	76.5	2685269		64.325	Average
> > > >	ColXTMT BMSC with PDGFRbAPC_1 male_008.fcs/Cells/Single Cells/Comp-Alexa Fluor 405-A-/Comp-FITC-A+	98.8	2651834		3.47503	St.Dev
> > > >	ColXTMT BMSC with PDGFRbAPC_1 male_008.fcs/Cells/Single Cells/Comp-Alexa Fluor 405-A-/Comp-FITC-A-	1.25	33435		5.52955	Confidence interval
> > > > >	ColXTMT BMSC with PDGFRbAPC_1 male_008.fcs/Cells/Single Cells/Comp-Alexa Fluor 405-A-/Comp-FITC-A-/Comp-2-A+	1	336
> > > > > >	ColXTMT BMSC with PDGFRbAPC_1 male_008.fcs/Cells/Single Cells/Comp-Alexa Fluor 405-A-/Comp-FITC-A-/Comp-2-A+/APC	46.4	156
> > > > > >	ColXTMT BMSC with PDGFRbAPC_1 male_008.fcs/Cells/Single Cells/Comp-Alexa Fluor 405-A-/Comp-FITC-A-/Comp-2-A+/Comp-APC-A+	64.6	217
> > > > > >	ColXTMT BMSC with PDGFRbAPC_1 male_008.fcs/Cells/Single Cells/Comp-Alexa Fluor 405-A-/Comp-FITC-A-/Comp-2-A+/Comp-APC-A-	35.4	119
> > > > >	ColXTMT BMSC with PDGFRbAPC_1 male_008.fcs/Cells/Single Cells/Comp-Alexa Fluor 405-A-/Comp-FITC-A-/Comp-2-A-	99	33099
> > > > > >	ColXTMT BMSC with PDGFRbAPC_1 male_008.fcs/Cells/Single Cells/Comp-Alexa Fluor 405-A-/Comp-FITC-A-/Comp-2-A-/Comp-APC-A+	44.5	14736
> > > > > >	ColXTMT BMSC with PDGFRbAPC_1 male_008.fcs/Cells/Single Cells/Comp-Alexa Fluor 405-A-/Comp-FITC-A-/Comp-2-A-/Comp-APC-A-	55.5	18363
	ColXTMT BMSC with PDGFRbAPC_1-2 male_006.fcs		3719030
>	ColXTMT BMSC with PDGFRbAPC_1-2 male_006.fcs/Cells	100	3718292
> >	ColXTMT BMSC with PDGFRbAPC_1-2 male_006.fcs/Cells/Single Cells	89.8	3338308
> > >	ColXTMT BMSC with PDGFRbAPC_1-2 male_006.fcs/Cells/Single Cells/Comp-Alexa Fluor 405-A+	22.7	759379
> > >	ColXTMT BMSC with PDGFRbAPC_1-2 male_006.fcs/Cells/Single Cells/Comp-Alexa Fluor 405-A-	77.3	2578929
> > > >	ColXTMT BMSC with PDGFRbAPC_1-2 male_006.fcs/Cells/Single Cells/Comp-Alexa Fluor 405-A-/Comp-FITC-A+	98.3	2535680
> > > >	ColXTMT BMSC with PDGFRbAPC_1-2 male_006.fcs/Cells/Single Cells/Comp-Alexa Fluor 405-A-/Comp-FITC-A-	1.68	43249
> > > > >	ColXTMT BMSC with PDGFRbAPC_1-2 male_006.fcs/Cells/Single Cells/Comp-Alexa Fluor 405-A-/Comp-FITC-A-/Comp-2-A+	0.54	235
> > > > > >	ColXTMT BMSC with PDGFRbAPC_1-2 male_006.fcs/Cells/Single Cells/Comp-Alexa Fluor 405-A-/Comp-FITC-A-/Comp-2-A+/APC	48.9	115
> > > > > >	ColXTMT BMSC with PDGFRbAPC_1-2 male_006.fcs/Cells/Single Cells/Comp-Alexa Fluor 405-A-/Comp-FITC-A-/Comp-2-A+/Comp-APC-A+	68.5	161
> > > > > >	ColXTMT BMSC with PDGFRbAPC_1-2 male_006.fcs/Cells/Single Cells/Comp-Alexa Fluor 405-A-/Comp-FITC-A-/Comp-2-A+/Comp-APC-A-	31.5	74
> > > > >	ColXTMT BMSC with PDGFRbAPC_1-2 male_006.fcs/Cells/Single Cells/Comp-Alexa Fluor 405-A-/Comp-FITC-A-/Comp-2-A-	99.5	43014
> > > > > >	ColXTMT BMSC with PDGFRbAPC_1-2 male_006.fcs/Cells/Single Cells/Comp-Alexa Fluor 405-A-/Comp-FITC-A-/Comp-2-A-/Comp-APC-A+	49.3	21185
> > > > > >	ColXTMT BMSC with PDGFRbAPC_1-2 male_006.fcs/Cells/Single Cells/Comp-Alexa Fluor 405-A-/Comp-FITC-A-/Comp-2-A-/Comp-APC-A-	50.7	21829
	ColXTMT BMSC with PDGFRbAPC_2 male_007.fcs		2654785
>	ColXTMT BMSC with PDGFRbAPC_2 male_007.fcs/Cells	100	2654426
> >	ColXTMT BMSC with PDGFRbAPC_2 male_007.fcs/Cells/Single Cells	93.2	2474271
> > >	ColXTMT BMSC with PDGFRbAPC_2 male_007.fcs/Cells/Single Cells/Comp-Alexa Fluor 405-A+	19.2	475430
> > >	ColXTMT BMSC with PDGFRbAPC_2 male_007.fcs/Cells/Single Cells/Comp-Alexa Fluor 405-A-	80.8	1998841
> > > >	ColXTMT BMSC with PDGFRbAPC_2 male_007.fcs/Cells/Single Cells/Comp-Alexa Fluor 405-A-/Comp-FITC-A+	97.4	1947205
> > > >	ColXTMT BMSC with PDGFRbAPC_2 male_007.fcs/Cells/Single Cells/Comp-Alexa Fluor 405-A-/Comp-FITC-A-	2.58	51636
> > > > >	ColXTMT BMSC with PDGFRbAPC_2 male_007.fcs/Cells/Single Cells/Comp-Alexa Fluor 405-A-/Comp-FITC-A-/Comp-2-A+	0.65	335
> > > > > >	ColXTMT BMSC with PDGFRbAPC_2 male_007.fcs/Cells/Single Cells/Comp-Alexa Fluor 405-A-/Comp-FITC-A-/Comp-2-A+/Comp-APC-A+	60	201
> > > > > >	ColXTMT BMSC with PDGFRbAPC_2 male_007.fcs/Cells/Single Cells/Comp-Alexa Fluor 405-A-/Comp-FITC-A-/Comp-2-A+/Comp-APC-A-	40	134
> > > > >	ColXTMT BMSC with PDGFRbAPC_2 male_007.fcs/Cells/Single Cells/Comp-Alexa Fluor 405-A-/Comp-FITC-A-/Comp-2-A-	99.4	51301
> > > > > >	ColXTMT BMSC with PDGFRbAPC_2 male_007.fcs/Cells/Single Cells/Comp-Alexa Fluor 405-A-/Comp-FITC-A-/Comp-2-A-/Comp-APC-A+	34.7	17801
> > > > > >	ColXTMT BMSC with PDGFRbAPC_2 male_007.fcs/Cells/Single Cells/Comp-Alexa Fluor 405-A-/Comp-FITC-A-/Comp-2-A-/Comp-APC-A-	65.3	33500
	ColXTMT BMSC with PDGFRbAPC_3 female_009.fcs		3025015
>	ColXTMT BMSC with PDGFRbAPC_3 female_009.fcs/Cells	100	3024130
> >	ColXTMT BMSC with PDGFRbAPC_3 female_009.fcs/Cells/Single Cells	90.5	2737728
> > >	ColXTMT BMSC with PDGFRbAPC_3 female_009.fcs/Cells/Single Cells/Comp-Alexa Fluor 405-A+	21.2	579808
> > >	ColXTMT BMSC with PDGFRbAPC_3 female_009.fcs/Cells/Single Cells/Comp-Alexa Fluor 405-A-	78.8	2157920
> > > >	ColXTMT BMSC with PDGFRbAPC_3 female_009.fcs/Cells/Single Cells/Comp-Alexa Fluor 405-A-/Comp-FITC-A+	98.4	2124330
> > > >	ColXTMT BMSC with PDGFRbAPC_3 female_009.fcs/Cells/Single Cells/Comp-Alexa Fluor 405-A-/Comp-FITC-A-	1.56	33590
> > > > >	ColXTMT BMSC with PDGFRbAPC_3 female_009.fcs/Cells/Single Cells/Comp-Alexa Fluor 405-A-/Comp-FITC-A-/Comp-2-A+	0.36	120
> > > > > >	ColXTMT BMSC with PDGFRbAPC_3 female_009.fcs/Cells/Single Cells/Comp-Alexa Fluor 405-A-/Comp-FITC-A-/Comp-2-A+/APC	41.7	50
> > > > > >	ColXTMT BMSC with PDGFRbAPC_3 female_009.fcs/Cells/Single Cells/Comp-Alexa Fluor 405-A-/Comp-FITC-A-/Comp-2-A+/Comp-APC-A+	64.2	77
> > > > > >	ColXTMT BMSC with PDGFRbAPC_3 female_009.fcs/Cells/Single Cells/Comp-Alexa Fluor 405-A-/Comp-FITC-A-/Comp-2-A+/Comp-APC-A-	35.8	43
> > > > >	ColXTMT BMSC with PDGFRbAPC_3 female_009.fcs/Cells/Single Cells/Comp-Alexa Fluor 405-A-/Comp-FITC-A-/Comp-2-A-	99.6	33470
> > > > > >	ColXTMT BMSC with PDGFRbAPC_3 female_009.fcs/Cells/Single Cells/Comp-Alexa Fluor 405-A-/Comp-FITC-A-/Comp-2-A-/Comp-APC-A+	28.8	9630
> > > > > >	ColXTMT BMSC with PDGFRbAPC_3 female_009.fcs/Cells/Single Cells/Comp-Alexa Fluor 405-A-/Comp-FITC-A-/Comp-2-A-/Comp-APC-A-	71.2	23840
	Compensation Controls_DAPi Alexa Fluor 405 Stained Control_005.fcs		5000
	Compensation Controls_DUMP FITC Stained Control_002.fcs		5000
	Compensation Controls_PDGFRb APC Stained Control_004.fcs		5000
	Compensation Controls_Tomato 2 Stained Control_003.fcs		6927
	Compensation Controls_Unstained Control_001.fcs		5000
