# Supplementary material for: Hypertrophic chondrocytes serve as a reservoir for marrow-associated skeletal stem and progenitor cells, osteoblasts, and adipocytes during skeletal development
Source: eLife journal article supplement (doi:10.7554/elife.76932), 2022-02-18
Supplement: supp [file elife-76932-supp-v1.zip › elife_poa_e76932_Figure_3_source_data_1.xlsx]

## Sheet: Sheet1
Animal #
	PD+TOM+OCN-	PD+TOM+
1-1	11	28	0.392857
1-2	7	24	0.291667
2-1	7	10	0.7
2-2	4	13	0.307692
3-1	2	14	0.142857
		Average	0.367015
		St.Dev	0.206755
		Confidence	0.25672
