# Supplementary material for: Hypertrophic chondrocytes serve as a reservoir for marrow-associated skeletal stem and progenitor cells, osteoblasts, and adipocytes during skeletal development
Source: eLife journal article supplement (doi:10.7554/elife.76932), 2022-02-18
Supplement: supp [file elife-76932-supp-v1.zip › elife_poa_e76932_Figure_5_figure_supplement_1_source_data_1.xlsx]

## Sheet: Sheet1
Sample #	Double +	Lepr only	ratio
5318	15	30	0.333333
	7	17	0.291667
5380	7	9	0.4375
	10	14	0.416667
5384	15	20	0.428571
	2	4	0.333333
		Average	0.373512
		St.dev	0.0615071
		Confidence interval	0.0645478
