# Supplementary material for: Hypertrophic chondrocytes serve as a reservoir for marrow-associated skeletal stem and progenitor cells, osteoblasts, and adipocytes during skeletal development
Source: eLife journal article supplement (doi:10.7554/elife.76932), 2022-02-18
Supplement: supp [file elife-76932-supp-v1.zip › elife_poa_e76932_Figure_5_figure_supplement_1_source_data_2.xlsx]

## Sheet: Sheet1
Depth	Name	Statistic	#Cells
	ColX;TMT;PDGFRGFP_2_006.fcs		3345650
>	ColX;TMT;PDGFRGFP_2_006.fcs/Cells	43	1437264
> >	ColX;TMT;PDGFRGFP_2_006.fcs/Cells/Single Cells	86.4	1241462
> > >	ColX;TMT;PDGFRGFP_2_006.fcs/Cells/Single Cells/Comp-Alexa Fluor 405-A+	12.6	156243
> > >	ColX;TMT;PDGFRGFP_2_006.fcs/Cells/Single Cells/Comp-Alexa Fluor 405-A-	87.4	1085219
> > > >	ColX;TMT;PDGFRGFP_2_006.fcs/Cells/Single Cells/Comp-Alexa Fluor 405-A-/Comp-APC-A+	93.4	1013497
> > > >	ColX;TMT;PDGFRGFP_2_006.fcs/Cells/Single Cells/Comp-Alexa Fluor 405-A-/Comp-APC-A-	6.61	71722
> > > > >	ColX;TMT;PDGFRGFP_2_006.fcs/Cells/Single Cells/Comp-Alexa Fluor 405-A-/Comp-APC-A-/Comp-2-A+	0.35	250
> > > > > >	ColX;TMT;PDGFRGFP_2_006.fcs/Cells/Single Cells/Comp-Alexa Fluor 405-A-/Comp-APC-A-/Comp-2-A+/Comp-GFP-A+	71.6	179
> > > > > >	ColX;TMT;PDGFRGFP_2_006.fcs/Cells/Single Cells/Comp-Alexa Fluor 405-A-/Comp-APC-A-/Comp-2-A+/Comp-GFP-A-	28.4	71
> > > > >	ColX;TMT;PDGFRGFP_2_006.fcs/Cells/Single Cells/Comp-Alexa Fluor 405-A-/Comp-APC-A-/Comp-2-A-	99.7	71472		Tom+PD+/ Total PD+
> > > > >	ColX;TMT;PDGFRGFP_2_006.fcs/Cells/Single Cells/Comp-Alexa Fluor 405-A-/Comp-APC-A-/Comp-GFP-A+	0.86	614		26.925	Average
> > > > > >	ColX;TMT;PDGFRGFP_2_006.fcs/Cells/Single Cells/Comp-Alexa Fluor 405-A-/Comp-APC-A-/Comp-GFP-A+/Comp-2-A+	29.2	179		3.79067	st.dev
> > > > > >	ColX;TMT;PDGFRGFP_2_006.fcs/Cells/Single Cells/Comp-Alexa Fluor 405-A-/Comp-APC-A-/Comp-GFP-A+/Comp-2-A-	70.8	435		6.0318	confidence interval
> > > > >	ColX;TMT;PDGFRGFP_2_006.fcs/Cells/Single Cells/Comp-Alexa Fluor 405-A-/Comp-APC-A-/Comp-GFP-A-	99.1	71108
> > > > >	ColX;TMT;PDGFRGFP_2_006.fcs/Cells/Single Cells/Comp-Alexa Fluor 405-A-/Comp-APC-A-/Q1: Comp-2-A- , Comp-GFP-A+	0.57	409
> > > > >	ColX;TMT;PDGFRGFP_2_006.fcs/Cells/Single Cells/Comp-Alexa Fluor 405-A-/Comp-APC-A-/Q2: Comp-2-A+ , Comp-GFP-A+	0.25	179
> > > > >	ColX;TMT;PDGFRGFP_2_006.fcs/Cells/Single Cells/Comp-Alexa Fluor 405-A-/Comp-APC-A-/Q3: Comp-2-A+ , Comp-GFP-A-	0.099	71
> > > > >	ColX;TMT;PDGFRGFP_2_006.fcs/Cells/Single Cells/Comp-Alexa Fluor 405-A-/Comp-APC-A-/Q4: Comp-2-A- , Comp-GFP-A-	99.1	71063
	ColX;TMT;PDGFRGFP_3_007.fcs		4091990
>	ColX;TMT;PDGFRGFP_3_007.fcs/Cells	38.7	1584035
> >	ColX;TMT;PDGFRGFP_3_007.fcs/Cells/Single Cells	85.1	1348775
> > >	ColX;TMT;PDGFRGFP_3_007.fcs/Cells/Single Cells/Comp-Alexa Fluor 405-A+	13.1	176031
> > >	ColX;TMT;PDGFRGFP_3_007.fcs/Cells/Single Cells/Comp-Alexa Fluor 405-A-	86.9	1172744
> > > >	ColX;TMT;PDGFRGFP_3_007.fcs/Cells/Single Cells/Comp-Alexa Fluor 405-A-/Comp-APC-A+	92.3	1082677
> > > >	ColX;TMT;PDGFRGFP_3_007.fcs/Cells/Single Cells/Comp-Alexa Fluor 405-A-/Comp-APC-A-	7.68	90067
> > > > >	ColX;TMT;PDGFRGFP_3_007.fcs/Cells/Single Cells/Comp-Alexa Fluor 405-A-/Comp-APC-A-/Comp-2-A+	0.41	373
> > > > > >	ColX;TMT;PDGFRGFP_3_007.fcs/Cells/Single Cells/Comp-Alexa Fluor 405-A-/Comp-APC-A-/Comp-2-A+/Comp-GFP-A+	75.6	282
> > > > > >	ColX;TMT;PDGFRGFP_3_007.fcs/Cells/Single Cells/Comp-Alexa Fluor 405-A-/Comp-APC-A-/Comp-2-A+/Comp-GFP-A-	24.4	91
> > > > >	ColX;TMT;PDGFRGFP_3_007.fcs/Cells/Single Cells/Comp-Alexa Fluor 405-A-/Comp-APC-A-/Comp-2-A-	99.6	89694
> > > > >	ColX;TMT;PDGFRGFP_3_007.fcs/Cells/Single Cells/Comp-Alexa Fluor 405-A-/Comp-APC-A-/Comp-GFP-A+	1.03	930
> > > > > >	ColX;TMT;PDGFRGFP_3_007.fcs/Cells/Single Cells/Comp-Alexa Fluor 405-A-/Comp-APC-A-/Comp-GFP-A+/Comp-2-A+	30.3	282
> > > > > >	ColX;TMT;PDGFRGFP_3_007.fcs/Cells/Single Cells/Comp-Alexa Fluor 405-A-/Comp-APC-A-/Comp-GFP-A+/Comp-2-A-	69.7	648
> > > > >	ColX;TMT;PDGFRGFP_3_007.fcs/Cells/Single Cells/Comp-Alexa Fluor 405-A-/Comp-APC-A-/Comp-GFP-A-	99	89137
> > > > >	ColX;TMT;PDGFRGFP_3_007.fcs/Cells/Single Cells/Comp-Alexa Fluor 405-A-/Comp-APC-A-/Q1: Comp-2-A- , Comp-GFP-A+	0.016	14
> > > > >	ColX;TMT;PDGFRGFP_3_007.fcs/Cells/Single Cells/Comp-Alexa Fluor 405-A-/Comp-APC-A-/Q2: Comp-2-A+ , Comp-GFP-A+	1.01	908
> > > > >	ColX;TMT;PDGFRGFP_3_007.fcs/Cells/Single Cells/Comp-Alexa Fluor 405-A-/Comp-APC-A-/Q3: Comp-2-A+ , Comp-GFP-A-	3.37	3033
> > > > >	ColX;TMT;PDGFRGFP_3_007.fcs/Cells/Single Cells/Comp-Alexa Fluor 405-A-/Comp-APC-A-/Q4: Comp-2-A- , Comp-GFP-A-	95.6	86112
	Compensation Controls_Alexa Fluor 405 Stained Control_004.fcs		5000
	Compensation Controls_Alexa Fluor 405 Stained Control_005.fcs		5000
	Compensation Controls_ColX 2 Stained Control_003.fcs		5000
	Compensation Controls_Dump APC Stained Control_004.fcs		5000
	Compensation Controls_GFP Stained Control_002.fcs		5000
	Compensation Controls_PDGFRa GFP Stained Control_002.fcs		5000
	Compensation Controls_Unstained Control_001.fcs		5000
	Compensation Controls_Unstained Control_001.fcs		5000
	Compensation Controls_APC Stained Control_004.fcs		5000
	Compensation Controls_Alexa Fluor 405 Stained Control_005.fcs		5000
	Compensation Controls_GFP Stained Control_002.fcs		5000
	Compensation Controls_Unstained Control_001.fcs		5000
	Compensation Controls_2 Stained Control_003.fcs		5000
	SAMPLE 1-11_Tube_001_006.fcs		7363965
>	SAMPLE 1-11_Tube_001_006.fcs/cells	99.3	7315356
> >	SAMPLE 1-11_Tube_001_006.fcs/cells/Single Cells	93.8	6864547
> > >	SAMPLE 1-11_Tube_001_006.fcs/cells/Single Cells/Comp-Alexa Fluor 405-A+	21.7	1486198
> > >	SAMPLE 1-11_Tube_001_006.fcs/cells/Single Cells/Comp-Alexa Fluor 405-A-	78.3	5378349
> > > >	SAMPLE 1-11_Tube_001_006.fcs/cells/Single Cells/Comp-Alexa Fluor 405-A-/dump, FSC-H subset	1.35	72483
> > > > >	SAMPLE 1-11_Tube_001_006.fcs/cells/Single Cells/Comp-Alexa Fluor 405-A-/dump, FSC-H subset/pdgfra, FSC-A subset	4.46	3234
> > > > > >	SAMPLE 1-11_Tube_001_006.fcs/cells/Single Cells/Comp-Alexa Fluor 405-A-/dump, FSC-H subset/pdgfra, FSC-A subset/tmt+	21.8	706
> > > > > >	SAMPLE 1-11_Tube_001_006.fcs/cells/Single Cells/Comp-Alexa Fluor 405-A-/dump, FSC-H subset/pdgfra, FSC-A subset/tmt-	78.2	2528
> > > > >	SAMPLE 1-11_Tube_001_006.fcs/cells/Single Cells/Comp-Alexa Fluor 405-A-/dump, FSC-H subset/tmt, FSC-A subset	0.9	652
> > > > > >	SAMPLE 1-11_Tube_001_006.fcs/cells/Single Cells/Comp-Alexa Fluor 405-A-/dump, FSC-H subset/tmt, FSC-A subset/pdgfra, FSC-A subset	95.9	625
	Sample 1-12_Tube_001_007.fcs		3958255
>	Sample 1-12_Tube_001_007.fcs/cells	99	3918671
> >	Sample 1-12_Tube_001_007.fcs/cells/Single Cells	91.8	3599022
> > >	Sample 1-12_Tube_001_007.fcs/cells/Single Cells/Comp-Alexa Fluor 405-A+	22	791469
> > >	Sample 1-12_Tube_001_007.fcs/cells/Single Cells/Comp-Alexa Fluor 405-A-	78	2807553
> > > >	Sample 1-12_Tube_001_007.fcs/cells/Single Cells/Comp-Alexa Fluor 405-A-/dump, FSC-H subset	3.24	90875
> > > > >	Sample 1-12_Tube_001_007.fcs/cells/Single Cells/Comp-Alexa Fluor 405-A-/dump, FSC-H subset/pdgfra, FSC-A subset	2.33	2117
> > > > > >	Sample 1-12_Tube_001_007.fcs/cells/Single Cells/Comp-Alexa Fluor 405-A-/dump, FSC-H subset/pdgfra, FSC-A subset/tmt+	26.4	558
> > > > > >	Sample 1-12_Tube_001_007.fcs/cells/Single Cells/Comp-Alexa Fluor 405-A-/dump, FSC-H subset/pdgfra, FSC-A subset/tmt-	73.6	1559
> > > > >	Sample 1-12_Tube_001_007.fcs/cells/Single Cells/Comp-Alexa Fluor 405-A-/dump, FSC-H subset/tmt, FSC-A subset	0.58	527
> > > > > >	Sample 1-12_Tube_001_007.fcs/cells/Single Cells/Comp-Alexa Fluor 405-A-/dump, FSC-H subset/tmt, FSC-A subset/pdgfra, FSC-A subset	95.3	502
