# Supplementary material for: Hypertrophic chondrocytes serve as a reservoir for marrow-associated skeletal stem and progenitor cells, osteoblasts, and adipocytes during skeletal development
Source: eLife journal article supplement (doi:10.7554/elife.76932), 2022-02-18
Supplement: supp [file elife-76932-supp-v1.zip › elife_poa_e76932_Figure_6_source_data_1.xlsx]

## Sheet: Sheet1
Adipocyte Quantification	RFP+perilipin antibodies	3 stitched images @20x ~1.75mm
13M old
Sample #	fat				Average	St.dev	Confidence interval
3246	11	73	0.150685		0.275881	0.162291	0.124748
	6	40	0.15
	11	40	0.275
2920	17	42	0.404762
	13	26	0.5
	19	36	0.527778
3791	3	32	0.09375
	6	28	0.214286
	8	48	0.166667
