# Supplementary material for: Hypertrophic chondrocytes serve as a reservoir for marrow-associated skeletal stem and progenitor cells, osteoblasts, and adipocytes during skeletal development
Source: eLife journal article supplement (doi:10.7554/elife.76932), 2022-02-18
Supplement: supp [file elife-76932-supp-v1.zip › elife_poa_e76932_Figure_7_source_data_1.xlsx]

## Sheet: Sheet1
CFU 2M Tomato colonies
Tomato +	Total Colonies	Ratio
35	62	0.564516	animal 1
33	72	0.458333	animal 7
22	66	0.333333	animal 8
31	58	0.534483	animal 9
29	57	0.508772	animal 11
21	44	0.477273	animal 12
CFU 8M Tomato Colonies
		0.7895	animal 1
		0.6	animal 1
		0.6667	animal 2
		0.5	animal 2
		0.5385	animal 3
		0.5714	animal 3
