# Supplementary material for: Hypertrophic chondrocytes serve as a reservoir for marrow-associated skeletal stem and progenitor cells, osteoblasts, and adipocytes during skeletal development
Source: eLife journal article supplement (doi:10.7554/elife.76932), 2022-02-18
Supplement: supp [file elife-76932-supp-v1.zip › elife_poa_e76932_Figure_7_source_data_2.xlsx]

## Sheet: Sheet1
GeneID	GeneName	IsCoding	logFC (Group2 / Group1)	lfcSE	stat	pvalue	padj	T1	T2	T3	NT1	NT2	NT3
ENSMUSG00000018774	Cd68	TRUE	-1.0492	0.0889676	-11.793	4.24044e-32	6.24829e-28	2927.18	2643.08	2919	1370.53	1400.73	1330.03
ENSMUSG00000022488	Nckap1l	TRUE	-0.897455	0.0793461	-11.3106	1.16251e-29	8.56477e-26	2569.4	2468.14	2570.33	1404.88	1346.74	1333.04
ENSMUSG00000000365	Rnf17	TRUE	2.89676	0.310598	9.32641	1.0952e-20	5.37927e-17	21.6523	33.4459	38.1831	297.693	185.093	214.488
ENSMUSG00000040552	C3ar1	TRUE	-0.878569	0.0963495	-9.11856	7.61269e-20	2.80432e-16	2476.61	2621.65	2536.16	1475.87	1411.33	1266.89
ENSMUSG00000021939	Ctsb	TRUE	-0.736697	0.0824047	-8.94	3.89179e-19	1.14691e-15	36488.2	35754.5	38857.3	22629.2	23248.4	20794.4
ENSMUSG00000053063	Clec12a	TRUE	-1.18199	0.138209	-8.55216	1.20811e-17	2.96692e-14	748.55	726.377	782.754	375.551	290.171	330.753
ENSMUSG00000024621	Csf1r	TRUE	-0.66773	0.0783847	-8.51862	1.61462e-17	3.39878e-14	7873.17	7587.94	7215.6	4933.69	4772.89	4569.41
ENSMUSG00000015340	Cybb	TRUE	-0.786681	0.0933048	-8.4313	3.41834e-17	6.29615e-14	1605.36	1727.18	1701.16	996.126	1003.55	919.093
ENSMUSG00000027111	Itga6	TRUE	-0.889783	0.105888	-8.40304	4.35058e-17	7.12286e-14	2956.05	3415.77	3572.13	1854.86	1794.05	1718.91
ENSMUSG00000038147	Cd84	TRUE	-0.871867	0.105583	-8.25765	1.48575e-16	2.18925e-13	1605.36	1511.07	1514.26	869.034	896.543	764.742
ENSMUSG00000002944	Cd36	TRUE	-1.20221	0.146246	-8.2205	2.02658e-16	2.7147e-13	2653.95	2634.51	1925.23	1061.39	1021.87	1052.4
ENSMUSG00000056220	Pla2g4a	TRUE	0.613711	0.075846	8.09155	5.89122e-16	7.23392e-13	2229.15	2299.19	2331.18	3599.79	3527.37	3370.68
ENSMUSG00000004730	Emr1	TRUE	-0.825771	0.102963	-8.02005	1.05702e-15	1.19809e-12	4655.24	4309.38	4543.79	2689.54	2260.64	2672.09
ENSMUSG00000069516	Lyz2	TRUE	-0.839117	0.105192	-7.97698	1.49953e-15	1.57825e-12	30253.4	28071.4	29038.3	14376.3	16534	17921.8
ENSMUSG00000004266	Ptpn6	TRUE	-0.909169	0.116956	-7.77357	7.63018e-15	7.49538e-12	723.804	694.646	724.474	396.161	394.286	350.799
ENSMUSG00000036905	C1qb	TRUE	-1.00367	0.130295	-7.70308	1.32822e-14	1.22321e-11	3941.74	3574.43	4014.25	2220.1	1873.1	1658.78
ENSMUSG00000024300	Myo1f	TRUE	-0.777654	0.101684	-7.64776	2.04503e-14	1.77256e-11	1282.64	1280.38	1333.39	721.333	819.421	730.664
ENSMUSG00000040747	Cd53	TRUE	-0.902036	0.118695	-7.59961	2.97022e-14	2.43146e-11	1216.65	1224.64	1093.24	693.853	617.94	581.324
ENSMUSG00000021998	Lcp1	TRUE	-0.814606	0.108202	-7.5286	5.12873e-14	3.97746e-11	8632.04	8671.07	7058.85	4686.37	4676.48	4489.22
ENSMUSG00000026288	Inpp5d	TRUE	-0.80836	0.10767	-7.50774	6.01547e-14	4.4319e-11	1196.03	1038.54	1142.48	635.46	663.249	628.431
ENSMUSG00000060063	Alox5ap	TRUE	-0.786906	0.105322	-7.47144	7.93223e-14	5.56578e-11	1332.13	1304.39	1183.68	733.927	703.738	776.769
ENSMUSG00000050578	Mmp13	TRUE	-1.66883	0.22403	-7.44913	9.39567e-14	6.07987e-11	18036.3	12346.7	20535.5	3843.67	6181.33	5987.64
ENSMUSG00000020143	Dock2	TRUE	-0.940054	0.126219	-7.44781	9.49012e-14	6.07987e-11	1281.61	1220.35	1086.21	586.226	591.911	691.575
ENSMUSG00000021624	Cd180	TRUE	-0.990246	0.133687	-7.40717	1.29026e-13	7.92165e-11	755.767	779.547	678.253	393.871	389.466	331.756
ENSMUSG00000020120	Plek	TRUE	-0.81728	0.110953	-7.36597	1.75865e-13	1.00758e-10	2142.54	2172.27	1890.06	1228.56	1224.31	1069.44
ENSMUSG00000046805	Mpeg1	TRUE	-0.774283	0.105137	-7.36452	1.77788e-13	1.00758e-10	9512.56	9583.54	11107.3	5971.03	6259.41	5428.36
ENSMUSG00000040613	Apobec1	TRUE	-0.756488	0.102958	-7.34753	2.01909e-13	1.1019e-10	1772.39	1618.27	1773.5	968.647	1100.92	985.244
ENSMUSG00000020053	Igf1	TRUE	-0.999262	0.136372	-7.32749	2.34496e-13	1.23404e-10	2764.27	2920.09	3130.01	1615.56	1581.96	1212.76
ENSMUSG00000036896	C1qc	TRUE	-0.830759	0.116043	-7.15909	8.12154e-13	4.12658e-10	3502.51	3040.15	3320.93	2038.05	1861.53	1646.75
ENSMUSG00000028581	Laptm5	TRUE	-0.753559	0.105702	-7.1291	1.01025e-12	4.962e-10	4831.55	4438.02	3907.74	2664.35	2543.1	2608.94
ENSMUSG00000038642	Ctss	TRUE	-0.768877	0.108003	-7.11907	1.08661e-12	5.16493e-10	3464.36	3178.22	3924.82	2005.99	2132.42	2061.7
ENSMUSG00000032179	Bmp5	TRUE	0.989294	0.139401	7.09675	1.27727e-12	5.88142e-10	1623.92	1413.3	1771.5	3122.34	3629.55	2791.36
ENSMUSG00000036943	Rab8b	TRUE	-0.584443	0.0826273	-7.07324	1.51357e-12	6.75831e-10	3399.41	3189.37	3049.62	2158.27	2153.63	2115.82
ENSMUSG00000052384	Lrrc33	TRUE	-0.773777	0.109511	-7.06573	1.5977e-12	6.92416e-10	844.438	907.328	809.884	507.223	483.94	508.157
ENSMUSG00000050335	Lgals3	TRUE	-0.752498	0.107225	-7.01791	2.25206e-12	9.48116e-10	8507.28	8483.26	7194.5	4530.66	4665.88	5158.75
ENSMUSG00000022831	Hcls1	TRUE	-0.814858	0.116272	-7.00819	2.41417e-12	9.7795e-10	1036.22	979.365	895.293	577.066	562.026	516.176
ENSMUSG00000033777	Tlr13	TRUE	-0.788279	0.112518	-7.00581	2.45566e-12	9.7795e-10	1496.07	1483.63	1397.7	814.076	939.924	779.776
ENSMUSG00000029005	Draxin	TRUE	-1.89463	0.273241	-6.93389	4.09411e-12	1.58754e-09	209.305	288.149	385.85	75.5682	89.6543	72.1643
ENSMUSG00000032725	Folr2	TRUE	-1.40798	0.204017	-6.90131	5.15265e-12	1.94678e-09	780.512	694.646	644.089	200.37	259.323	337.769
ENSMUSG00000059456	Ptk2b	TRUE	-0.786083	0.114124	-6.88795	5.66038e-12	2.08514e-09	1463.07	1412.45	1473.06	755.682	936.068	827.885
ENSMUSG00000040522	Tlr8	TRUE	-0.891181	0.130425	-6.83288	8.32286e-12	2.99115e-09	499.033	480.249	489.347	273.648	274.747	243.555
ENSMUSG00000030513	Pcsk6	TRUE	1.54169	0.227325	6.7819	1.18602e-11	4.16096e-09	673.282	622.609	527.53	1199.93	2302.09	1805.11
ENSMUSG00000069769	Msi2	TRUE	0.607724	0.0896889	6.77591	1.23623e-11	4.23626e-09	1422.86	1391.01	1399.71	2289.95	2097.72	2034.63
ENSMUSG00000057722	Lepr	TRUE	-2.78512	0.413028	-6.74318	1.54955e-11	5.18924e-09	408.3	354.184	1132.43	97.3227	69.4098	108.247
ENSMUSG00000055541	Lair1	TRUE	-0.950189	0.141392	-6.72027	1.8139e-11	5.93951e-09	456.76	521.413	504.419	272.503	262.215	233.532
ENSMUSG00000028339	Col15a1	TRUE	1.05811	0.158187	6.68897	2.24747e-11	7.19922e-09	7067.92	5059.77	7220.63	13750	11867.1	14666.4
ENSMUSG00000028927	Padi2	TRUE	-2.60595	0.393199	-6.62756	3.41288e-11	1.0575e-08	190.746	120.92	285.368	21.7545	33.7409	42.0959
ENSMUSG00000054342	Kcnn4	TRUE	-0.951866	0.143652	-6.62618	3.44486e-11	1.0575e-08	555.741	572.011	581.79	333.187	256.431	295.673
ENSMUSG00000026321	Tnfrsf11a	TRUE	-0.894232	0.136052	-6.5727	4.94097e-11	1.48582e-08	596.984	596.881	515.472	326.317	305.596	288.657
ENSMUSG00000027506	Tpd52	TRUE	-0.939542	0.143667	-6.53971	6.16381e-11	1.81648e-08	1142.41	1241.79	1120.37	721.333	535.998	572.303
ENSMUSG00000037902	Sirpa	TRUE	-0.625826	0.0957478	-6.5362	6.31029e-11	1.82318e-08	7077.2	6354.72	6021.88	4313.11	4295.69	3998.11
ENSMUSG00000000359	Rem1	TRUE	1.58196	0.243661	6.49246	8.44476e-11	2.39295e-08	75.2674	111.486	69.3325	273.648	272.819	223.509
ENSMUSG00000031387	Renbp	TRUE	-0.870264	0.134352	-6.47751	9.32508e-11	2.59255e-08	445.418	449.376	429.058	239.299	227.51	257.587
ENSMUSG00000030579	Tyrobp	TRUE	-0.758117	0.117334	-6.46118	1.03889e-10	2.81413e-08	1652.79	1522.22	1432.87	831.25	893.651	998.273
ENSMUSG00000018008	Cyth4	TRUE	-0.94831	0.146808	-6.45951	1.05041e-10	2.81413e-08	1166.13	1118.29	1071.14	617.14	473.336	649.479
ENSMUSG00000027460	Angpt4	TRUE	-1.606	0.249604	-6.43418	1.24143e-10	3.26652e-08	1079.52	1588.25	2323.14	556.457	589.983	493.123
ENSMUSG00000025017	Pik3ap1	TRUE	-0.777015	0.121051	-6.41893	1.37238e-10	3.54771e-08	820.724	896.179	802.85	464.859	469.48	536.221
ENSMUSG00000052688	5430435G22Rik	TRUE	-0.762004	0.119051	-6.40065	1.54721e-10	3.9307e-08	700.09	722.946	674.233	436.235	378.862	422.963
ENSMUSG00000031506	Ptpn7	TRUE	-0.839861	0.132296	-6.34833	2.17668e-10	5.43616e-08	473.257	489.683	468.245	247.314	265.107	286.653
ENSMUSG00000028931	Kcnab2	TRUE	-1.00281	0.158249	-6.33693	2.34382e-10	5.75602e-08	819.693	867.879	732.513	446.539	330.661	431.984
ENSMUSG00000030064	Frmd4b	TRUE	-0.806931	0.127529	-6.32742	2.49292e-10	6.02182e-08	569.145	527.416	566.718	293.113	336.445	319.728
ENSMUSG00000040751	Lat2	TRUE	-0.888103	0.140627	-6.31529	2.69663e-10	6.40884e-08	622.76	545.426	512.457	316.012	307.524	284.648
ENSMUSG00000027656	Wisp2	TRUE	-0.784499	0.124591	-6.29661	3.04223e-10	7.11544e-08	3370.54	3842.85	4300.62	2346.05	2316.55	2022.61
ENSMUSG00000036887	C1qa	TRUE	-1.12546	0.17883	-6.29346	3.10463e-10	7.14793e-08	3635.52	3400.33	4326.75	2119.34	1747.78	1342.06
ENSMUSG00000025473	Adam8	TRUE	-0.878212	0.139692	-6.28676	3.2415e-10	7.34823e-08	7065.85	8179.67	5706.36	3725.74	3781.87	3891.86
ENSMUSG00000007891	Ctsd	TRUE	-0.652494	0.104083	-6.26896	3.63467e-10	8.11467e-08	31840.2	32578.9	37060.7	20196.2	20864.4	23497.5
ENSMUSG00000027698	Nceh1	TRUE	-0.782665	0.124953	-6.26369	3.75972e-10	8.26857e-08	1438.33	1373	1249.99	843.845	827.133	690.573
ENSMUSG00000049130	C5ar1	TRUE	-0.813275	0.130246	-6.24413	4.26177e-10	9.23488e-08	2030.16	2240.02	1725.27	1223.98	1118.27	1071.44
ENSMUSG00000028211	Trp53inp1	TRUE	-0.543371	0.0875526	-6.20622	5.42751e-10	1.15905e-07	6157.49	5859.04	6459.98	4409.29	4321.72	3946.99
ENSMUSG00000021451	Sema4d	TRUE	-0.795018	0.129821	-6.12396	9.12764e-10	1.92137e-07	690.81	655.197	715.431	440.814	360.545	387.883
ENSMUSG00000030707	Coro1a	TRUE	-0.744201	0.121772	-6.11145	9.8731e-10	2.04902e-07	981.569	1145.74	975.679	614.85	582.271	656.495
ENSMUSG00000023992	Trem2	TRUE	-0.894402	0.146565	-6.10242	1.04473e-09	2.11221e-07	1134.17	988.799	1210.81	684.694	524.429	585.333
ENSMUSG00000039621	Prex1	TRUE	-0.638086	0.104584	-6.10115	1.05308e-09	2.11221e-07	891.867	842.151	824.956	541.572	533.106	569.297
ENSMUSG00000038178	Slc43a2	TRUE	-0.644482	0.105653	-6.09999	1.06076e-09	2.11221e-07	2966.36	2589.91	2916.99	1677.38	1946.37	1794.09
ENSMUSG00000051506	Wdfy4	TRUE	-0.757085	0.124217	-6.09486	1.09534e-09	2.15198e-07	703.183	755.535	638.06	428.22	412.603	400.913
ENSMUSG00000030560	Ctsc	TRUE	-0.750922	0.123734	-6.06886	1.28819e-09	2.49755e-07	2457.02	3015.28	2464.82	1567.47	1459.53	1690.85
ENSMUSG00000058715	Fcer1g	TRUE	-0.694174	0.114521	-6.06157	1.34801e-09	2.57961e-07	1314.6	1322.4	1155.54	743.087	754.831	845.927
ENSMUSG00000022270	Fam134b	TRUE	-0.808389	0.133927	-6.03605	1.57936e-09	2.98358e-07	454.697	477.676	443.125	275.938	242.934	267.609
ENSMUSG00000002265	Peg3	TRUE	1.41783	0.235439	6.02209	1.72179e-09	3.21146e-07	242.299	162.942	182.877	638.895	394.286	537.223
ENSMUSG00000026211	Obsl1	TRUE	0.507065	0.084257	6.01807	1.76505e-09	3.251e-07	1241.4	1216.06	1243.97	1720.89	1707.29	1831.17
ENSMUSG00000020044	Timp3	TRUE	-0.8779	0.146227	-6.00367	1.92908e-09	3.50926e-07	135661	160617	200430	92384.4	85703.7	92200
ENSMUSG00000027199	Gatm	TRUE	-1.50108	0.250203	-5.99945	1.97992e-09	3.55782e-07	286.635	499.116	372.788	140.832	113.755	155.354
ENSMUSG00000016918	Sulf1	TRUE	1.51411	0.252722	5.99118	2.08318e-09	3.69827e-07	3967.52	4662.7	2212.61	11365	11578.9	8028.28
ENSMUSG00000022150	Dab2	TRUE	-0.520498	0.0872912	-5.96277	2.47993e-09	4.35021e-07	9186.75	8226.84	7983.28	5786.69	6045.4	5871.37
ENSMUSG00000030798	Cd37	TRUE	-1.08173	0.182238	-5.9358	2.92411e-09	5.06902e-07	301.07	315.592	261.253	137.397	123.395	154.352
ENSMUSG00000043157	Arl11	TRUE	-1.12167	0.189923	-5.90594	3.50647e-09	6.00788e-07	245.392	223.83	260.248	122.512	115.683	97.2214
ENSMUSG00000048865	Arhgap30	TRUE	-0.794752	0.134748	-5.89807	3.67777e-09	6.22896e-07	1206.34	1114.01	983.717	696.143	640.112	569.297
ENSMUSG00000021190	Lgmn	TRUE	-0.44835	0.0766131	-5.85213	4.85312e-09	8.12622e-07	5249.13	5328.19	5514.44	3835.66	4136.63	3819.7
ENSMUSG00000051323	Pcdh19	TRUE	-0.565158	0.0971363	-5.8182	5.94859e-09	9.8486e-07	3696.35	4020.37	4136.84	2541.84	2577.8	2891.59
ENSMUSG00000004707	Ly9	TRUE	-1.27006	0.21946	-5.78721	7.15646e-09	1.17167e-06	225.802	210.109	220.055	109.917	91.5824	71.1621
ENSMUSG00000032440	Tgfbr2	TRUE	-0.70241	0.121512	-5.78057	7.44485e-09	1.20549e-06	4206.73	4255.35	5266.25	3011.28	2737.83	2688.12
ENSMUSG00000029925	Tbxas1	TRUE	-0.901176	0.156271	-5.76676	8.08092e-09	1.27485e-06	339.219	342.177	331.59	162.586	200.517	178.406
ENSMUSG00000060216	Arrb2	TRUE	-0.56839	0.0985739	-5.76613	8.11121e-09	1.27485e-06	1061.99	1009.38	1003.81	657.214	707.594	707.612
ENSMUSG00000037280	Galnt6	TRUE	-1.2047	0.208942	-5.76568	8.13273e-09	1.27485e-06	195.901	225.546	233.118	111.062	91.5824	82.1872
ENSMUSG00000020437	Myo1g	TRUE	-0.757612	0.13149	-5.76175	8.32462e-09	1.29119e-06	519.654	469.1	456.188	278.228	290.171	285.651
ENSMUSG00000039031	Arhgap18	TRUE	-0.812303	0.141476	-5.74165	9.37562e-09	1.43906e-06	536.151	533.419	550.641	283.953	286.315	351.801
ENSMUSG00000018654	Ikzf1	TRUE	-0.877335	0.15313	-5.72934	1.00824e-08	1.53159e-06	355.716	376.481	352.691	217.545	196.661	177.404
ENSMUSG00000032291	Crabp1	TRUE	-3.60993	0.63043	-5.72614	1.02744e-08	1.54483e-06	110.323	85.7588	29.1397	4.57989	6.74817	7.01598
ENSMUSG00000026123	Plekhb2	TRUE	-0.640647	0.112901	-5.6744	1.39172e-08	2.07141e-06	2162.13	2400.39	2355.29	1613.27	1314.93	1511.44
ENSMUSG00000015950	Ncf1	TRUE	-0.630739	0.111272	-5.66845	1.44097e-08	2.12328e-06	1614.64	1430.46	1404.74	985.821	884.011	1004.29
ENSMUSG00000062345	Serpinb2	TRUE	-1.66356	0.295898	-5.62207	1.88681e-08	2.73273e-06	735.146	1068.55	653.132	377.841	224.618	174.397
ENSMUSG00000052889	Prkcb	TRUE	-1.19741	0.213	-5.62163	1.89168e-08	2.73273e-06	315.504	263.279	238.142	125.947	133.035	97.2214
ENSMUSG00000015355	Cd48	TRUE	-0.919638	0.163967	-5.60867	2.03892e-08	2.91684e-06	278.386	292.437	326.566	159.151	165.812	149.34
ENSMUSG00000026712	Mrc1	TRUE	-0.861633	0.154109	-5.59107	2.25668e-08	3.18123e-06	8484.59	7980.71	6598.64	4763.09	4479.82	3450.86
ENSMUSG00000036856	Wnt4	TRUE	-1.58294	0.283158	-5.59029	2.26691e-08	3.18123e-06	316.535	391.918	345.658	106.482	77.122	168.383
ENSMUSG00000022148	Fyb	TRUE	-0.643486	0.115629	-5.56511	2.61982e-08	3.64179e-06	1061.99	1162.89	983.717	727.058	660.357	668.523
ENSMUSG00000038843	Gcnt1	TRUE	-0.649151	0.117118	-5.54272	2.97801e-08	4.10103e-06	1594.02	1552.23	1650.92	886.209	1101.88	1068.43
ENSMUSG00000030786	Itgam	TRUE	-0.731903	0.132953	-5.50499	3.69193e-08	5.03021e-06	4318.08	4787.91	3473.66	2567.03	2550.81	2457.6
ENSMUSG00000042129	Rassf4	TRUE	-0.859939	0.15625	-5.50361	3.72102e-08	5.03021e-06	784.637	664.63	929.457	424.785	432.847	452.029
ENSMUSG00000030545	Pex11a	TRUE	0.905212	0.164766	5.49394	3.93073e-08	5.26539e-06	150.535	135.499	157.757	291.968	271.855	266.607
ENSMUSG00000028337	Coro2a	TRUE	-1.06427	0.193822	-5.49098	3.99702e-08	5.30595e-06	247.454	216.97	217.041	98.4676	123.395	103.235
ENSMUSG00000029915	Clec5a	TRUE	-0.726507	0.132716	-5.47414	4.39638e-08	5.78398e-06	413.455	394.49	390.874	234.719	247.754	241.55
ENSMUSG00000059498	Fcgr3	TRUE	-0.69379	0.127135	-5.45712	4.83912e-08	6.30321e-06	1888.9	1961.3	1544.41	1185.05	1095.13	1056.41
ENSMUSG00000004872	Pax3	TRUE	-21.33	3.90963	-5.45575	4.87659e-08	6.30321e-06	89.7022	0	0	0	0	0
ENSMUSG00000061132	Blnk	TRUE	-0.99889	0.183949	-5.43027	5.62697e-08	7.20987e-06	345.405	275.286	280.344	166.021	138.82	146.333
ENSMUSG00000029306	Ibsp	TRUE	-2.21162	0.408323	-5.41635	6.08277e-08	7.72669e-06	36597.5	15095.3	28719.7	6370.63	7004.6	3985.08
ENSMUSG00000027009	Itga4	TRUE	-0.72898	0.134874	-5.4049	6.48438e-08	8.16644e-06	1187.78	1147.45	1084.2	642.33	800.141	619.411
ENSMUSG00000098112	Bin2	TRUE	-1.1504	0.212938	-5.40252	6.57102e-08	8.20542e-06	198.995	178.378	228.094	84.728	102.187	85.194
ENSMUSG00000026069	Il1rl1	TRUE	-1.28368	0.237857	-5.39687	6.78144e-08	8.39702e-06	666.065	433.939	498.39	282.808	186.057	188.429
ENSMUSG00000046818	Ddit4l	TRUE	-0.867897	0.161196	-5.38412	7.27982e-08	8.93901e-06	1125.92	1177.47	1542.4	637.75	782.788	685.561
ENSMUSG00000078771	Evi2a	TRUE	-0.887996	0.165373	-5.36964	7.88935e-08	9.60741e-06	550.586	755.535	674.233	388.146	360.545	322.735
ENSMUSG00000034116	Vav1	TRUE	-0.837093	0.156122	-5.36178	8.24052e-08	9.95279e-06	512.437	512.837	532.554	249.604	340.301	280.639
ENSMUSG00000020901	Pik3r5	TRUE	-0.804255	0.150171	-5.35558	8.52807e-08	1.02163e-05	449.542	387.63	389.87	214.11	245.826	241.55
ENSMUSG00000024451	Arap3	TRUE	-0.783117	0.14635	-5.35097	8.74854e-08	1.03959e-05	421.704	482.822	412.98	258.764	237.15	270.616
ENSMUSG00000032925	Itgbl1	TRUE	-2.57221	0.481615	-5.34081	9.25316e-08	1.09076e-05	50.5219	116.632	164.79	19.4645	16.3884	20.0457
ENSMUSG00000022010	Tsc22d1	TRUE	-0.491204	0.0921709	-5.32928	9.8604e-08	1.15312e-05	6673.02	7355.53	6896.07	5168.41	4560.8	5159.75
ENSMUSG00000000290	Itgb2	TRUE	-0.692868	0.13025	-5.31951	1.04049e-07	1.20721e-05	2583.84	2553.9	2030.74	1460.99	1381.45	1592.63
ENSMUSG00000031827	Cotl1	TRUE	-0.728185	0.13695	-5.31715	1.05403e-07	1.21337e-05	3096.27	3035	2834.59	1597.24	2152.67	1660.78
ENSMUSG00000045658	Pid1	TRUE	-0.575477	0.108302	-5.31366	1.07447e-07	1.22732e-05	1995.1	1789.79	1749.39	1163.29	1341.92	1206.75
ENSMUSG00000033066	Gas7	TRUE	-1.24198	0.234163	-5.30391	1.13347e-07	1.28474e-05	316.535	248.7	251.205	133.962	126.287	85.194
ENSMUSG00000040857	Erf	TRUE	0.459225	0.0866393	5.30043	1.15533e-07	1.29952e-05	2020.88	1902.99	1990.55	2767.4	2819.77	2542.79
ENSMUSG00000020101	4632428N05Rik	TRUE	-0.553678	0.104901	-5.27809	1.30541e-07	1.45721e-05	1185.72	1102	1241.96	761.407	843.522	797.817
ENSMUSG00000062300	Pvrl2	TRUE	0.700112	0.132902	5.26788	1.38012e-07	1.52677e-05	679.469	862.733	734.522	1125.51	1282.15	1292.94
ENSMUSG00000026177	Slc11a1	TRUE	-0.651071	0.123619	-5.26677	1.38844e-07	1.52677e-05	839.283	892.749	843.043	479.744	577.451	581.324
ENSMUSG00000006221	Hspb7	TRUE	1.26266	0.240493	5.2503	1.5185e-07	1.65741e-05	230.957	170.66	308.479	551.877	478.156	671.529
ENSMUSG00000021994	Wnt5a	TRUE	-0.847144	0.161724	-5.23821	1.62144e-07	1.75676e-05	3401.47	4518.63	5234.1	2573.9	2443.8	2295.23
ENSMUSG00000040659	Efhd2	TRUE	-0.474581	0.0907255	-5.23095	1.6864e-07	1.8138e-05	2123.98	2152.54	1986.53	1560.6	1531.84	1416.23
ENSMUSG00000026395	Ptprc	TRUE	-0.697207	0.133331	-5.22912	1.70316e-07	1.81855e-05	1806.42	1708.31	1398.71	1073.98	932.212	1025.34
ENSMUSG00000044583	Tlr7	TRUE	-0.714434	0.136665	-5.22762	1.71704e-07	1.82018e-05	560.897	539.423	557.674	302.273	377.898	328.749
ENSMUSG00000024696	Lpxn	TRUE	-1.01609	0.194755	-5.21727	1.81576e-07	1.91109e-05	329.939	346.465	282.354	163.731	181.237	129.294
ENSMUSG00000055435	Maf	TRUE	-0.399498	0.0771241	-5.17994	2.21962e-07	2.31958e-05	5608.97	5631.78	5770.67	4556.99	4144.34	4197.56
ENSMUSG00000025314	Ptprj	TRUE	-0.498168	0.0965558	-5.15938	2.47768e-07	2.57102e-05	1467.2	1346.41	1397.7	937.733	1003.55	1038.36
ENSMUSG00000034330	Plcg2	TRUE	-0.621587	0.121247	-5.12663	2.94981e-07	3.03955e-05	660.91	673.206	594.853	430.51	428.027	395.902
ENSMUSG00000035187	Nkx6-1	TRUE	-3.51618	0.687708	-5.11289	3.17266e-07	3.24127e-05	28.8697	39.449	49.2361	3.43492	5.78415	1.00228
ENSMUSG00000060044	Tmem26	TRUE	-1.61134	0.315215	-5.11189	3.18958e-07	3.24127e-05	481.505	284.719	259.243	89.3079	93.5104	152.347
ENSMUSG00000020573	Pik3cg	TRUE	-0.766411	0.14999	-5.10976	3.22574e-07	3.24851e-05	716.587	590.878	721.46	428.22	414.531	349.797
ENSMUSG00000026676	Ccdc3	TRUE	2.6632	0.521289	5.10888	3.2408e-07	3.24851e-05	27.8386	11.1486	14.0675	117.932	162.92	53.121
ENSMUSG00000035184	Fam124a	TRUE	1.05657	0.207118	5.10132	3.37298e-07	3.35816e-05	492.847	349.038	417	670.954	883.047	1061.42
ENSMUSG00000032332	Col12a1	TRUE	0.701999	0.138003	5.08684	3.64081e-07	3.60049e-05	109543	120549	117114	222461	155943	186418
ENSMUSG00000059602	Syn3	TRUE	-1.35603	0.267629	-5.06683	4.04502e-07	3.97356e-05	264.982	234.979	321.542	144.267	100.259	77.1758
ENSMUSG00000055805	Fmnl1	TRUE	-0.653736	0.129128	-5.06268	4.13402e-07	4.03409e-05	755.767	622.609	706.387	444.249	457.912	421.961
ENSMUSG00000033721	Vav3	TRUE	-0.851527	0.168868	-5.04255	4.59365e-07	4.45312e-05	510.375	512.837	408.961	299.983	258.359	236.539
ENSMUSG00000024644	Cndp2	TRUE	-0.469407	0.0931844	-5.0374	4.71898e-07	4.54471e-05	2453.92	2571.05	2396.49	1768.98	1916.48	1674.81
ENSMUSG00000026473	Glul	TRUE	-0.583283	0.115832	-5.03561	4.76322e-07	4.55753e-05	1419.77	1469.05	1540.39	983.531	1091.28	881.006
ENSMUSG00000024376	Epb4.1l4a	TRUE	-1.12137	0.222796	-5.03319	4.82382e-07	4.58574e-05	647.506	638.045	869.168	398.45	239.078	353.806
ENSMUSG00000024965	Fermt3	TRUE	-0.718786	0.142917	-5.02939	4.92054e-07	4.62624e-05	820.724	873.882	694.33	435.09	514.789	501.141
ENSMUSG00000029919	Hpgds	TRUE	-0.753475	0.149825	-5.02905	4.92921e-07	4.62624e-05	789.792	770.114	719.45	468.294	509.969	373.851
ENSMUSG00000035095	Fam167a	TRUE	-1.82741	0.364821	-5.00904	5.47012e-07	5.10141e-05	155.69	249.558	423.029	75.5682	92.5464	65.1484
ENSMUSG00000029636	Wasf3	TRUE	1.87405	0.3766	4.97622	6.48363e-07	6.00857e-05	63.9257	30.8732	82.3951	271.359	222.69	153.349
ENSMUSG00000024066	Xdh	TRUE	-0.636528	0.128098	-4.96908	6.7271e-07	6.19524e-05	2213.69	2267.46	2230.7	1198.79	1581	1535.5
ENSMUSG00000031808	Slc27a1	TRUE	-0.538032	0.108465	-4.96043	7.03363e-07	6.43731e-05	653.692	644.048	655.142	451.119	430.919	463.055
ENSMUSG00000032911	Cspg4	TRUE	1.05147	0.214043	4.91241	8.99655e-07	8.18297e-05	777.419	594.308	412.98	1156.42	1261.91	1279.91
ENSMUSG00000024180	Tmem8	TRUE	-0.941477	0.191709	-4.91096	9.06334e-07	8.19315e-05	256.734	206.679	262.258	132.817	117.611	127.29
ENSMUSG00000043822	Adamtsl5	TRUE	0.671174	0.136894	4.90286	9.44531e-07	8.48638e-05	548.524	575.441	502.409	747.667	899.435	942.146
ENSMUSG00000033685	Ucp2	TRUE	-0.57761	0.11785	-4.90121	9.52475e-07	8.50589e-05	2046.65	1902.13	1801.64	1302.98	1140.44	1410.21
ENSMUSG00000041836	Ptpre	TRUE	-0.756801	0.154766	-4.88998	1.00847e-06	8.95172e-05	547.493	614.89	486.332	349.217	290.171	337.769
ENSMUSG00000031129	Slc9a9	TRUE	-0.844274	0.172703	-4.88859	1.01561e-06	8.96111e-05	977.445	1062.55	1026.92	720.188	508.041	482.098
ENSMUSG00000022103	Gfra2	TRUE	-5.11553	1.05416	-4.8527	1.2179e-06	0.00010682	19.5901	17.1518	177.853	2.28995	2.89207	1.00228
ENSMUSG00000024747	Aldh1a7	TRUE	3.48896	0.719457	4.84944	1.23811e-06	0.00010795	4.12424	1.71518	2.00964	28.6243	26.0287	32.073
ENSMUSG00000005142	Man2b1	TRUE	-0.382868	0.0792372	-4.83192	1.35221e-06	0.000117204	4344.89	4665.28	4437.28	3346.75	3603.52	3362.66
ENSMUSG00000022102	Dok2	TRUE	-0.97282	0.201491	-4.82812	1.37831e-06	0.000118768	684.624	615.748	446.139	312.578	323.912	253.578
ENSMUSG00000040111	Gramd1b	TRUE	-0.535963	0.111398	-4.81124	1.49995e-06	0.000128221	1213.56	1239.21	1063.1	836.975	766.4	822.874
ENSMUSG00000069792	Wfdc17	TRUE	-1.08804	0.226179	-4.81052	1.50541e-06	0.000128221	163.939	159.511	170.819	74.4232	92.5464	65.1484
ENSMUSG00000032826	Ank2	TRUE	0.584044	0.121539	4.80541	1.54435e-06	0.000130782	921.768	882.458	949.554	1560.6	1319.75	1248.84
ENSMUSG00000048779	P2ry6	TRUE	-0.688725	0.143496	-4.7996	1.58984e-06	0.000133864	589.766	590.878	590.833	312.578	371.15	413.943
ENSMUSG00000044533	Rps2	TRUE	0.594287	0.124453	4.7752	1.79526e-06	0.000150302	3246.81	2788.02	2730.09	4108.16	4999.43	4122.39
ENSMUSG00000021886	Gpr65	TRUE	-0.910629	0.191532	-4.75446	1.98975e-06	0.000165644	207.243	198.103	237.137	124.802	106.043	111.253
ENSMUSG00000018672	Copz2	TRUE	0.40922	0.0861813	4.74836	2.05076e-06	0.000169764	1977.57	1790.64	1836.81	2460.55	2411.99	2568.85
ENSMUSG00000043631	Ecm2	TRUE	0.893021	0.188311	4.74228	2.11329e-06	0.000173962	527.903	403.924	382.836	806.061	957.277	676.541
ENSMUSG00000030465	Psd3	TRUE	-0.492589	0.103904	-4.74081	2.12864e-06	0.000174253	2772.52	2652.52	2783.35	1940.73	1755.49	2137.87
ENSMUSG00000025272	Tro	TRUE	1.54001	0.325129	4.73662	2.17311e-06	0.00017691	240.237	268.425	150.723	358.376	841.594	717.634
ENSMUSG00000035342	Lzts2	TRUE	0.498211	0.105558	4.71979	2.36093e-06	0.000191145	1278.51	1203.2	1097.26	1780.43	1688.01	1587.62
ENSMUSG00000027544	Nfatc2	TRUE	-0.833261	0.177083	-4.70549	2.53262e-06	0.000203924	511.406	491.398	481.308	288.533	325.84	218.498
ENSMUSG00000041774	Ydjc	TRUE	0.836614	0.178005	4.69995	2.60231e-06	0.000208397	139.193	123.493	114.549	231.284	221.726	220.502
ENSMUSG00000026222	Sp100	TRUE	-0.77012	0.164035	-4.69485	2.66805e-06	0.000212506	427.89	505.119	504.419	243.879	275.711	322.735
ENSMUSG00000004626	Stxbp2	TRUE	-0.860912	0.183491	-4.69186	2.70738e-06	0.000213535	619.667	718.658	536.573	354.942	282.459	395.902
ENSMUSG00000028238	Atp6v0d2	TRUE	-3.08263	0.657045	-4.69166	2.70994e-06	0.000213535	85.578	26.5852	38.1831	8.01481	4.82012	5.01141
ENSMUSG00000038679	Trps1	TRUE	-0.423307	0.090504	-4.67722	2.90789e-06	0.000227914	2953.99	2786.3	2794.4	2141.1	1973.36	2250.12
ENSMUSG00000050505	Pcdh20	TRUE	1.92606	0.413972	4.65263	3.2773e-06	0.000255508	55.6772	71.1798	66.318	387.001	238.114	110.251
ENSMUSG00000045092	S1pr1	TRUE	-0.667352	0.143543	-4.64915	3.33307e-06	0.000257607	5218.2	5613.77	6341.41	3116.62	3432.89	4262.71
ENSMUSG00000030223	Ptpro	TRUE	-0.859655	0.184931	-4.64853	3.34311e-06	0.000257607	258.796	304.444	302.45	143.122	185.093	148.338
ENSMUSG00000035441	Myo1d	TRUE	0.463516	0.0997303	4.64769	3.35667e-06	0.000257607	2291.02	2041.06	2033.75	3129.21	2753.25	2895.59
ENSMUSG00000002111	Sfpi1	TRUE	-0.72455	0.156032	-4.64359	3.424e-06	0.000261413	737.208	640.618	540.592	364.101	392.358	403.92
ENSMUSG00000086596	Susd5	TRUE	-1.37886	0.297085	-4.64132	3.46196e-06	0.000262949	207.243	284.719	234.123	119.077	56.8775	104.237
ENSMUSG00000056737	Capg	TRUE	-0.47341	0.102244	-4.6302	3.65318e-06	0.000276049	4089.18	4112.13	3844.44	2577.33	3086.81	3009.85
ENSMUSG00000040479	Dgkz	TRUE	-0.424424	0.0917338	-4.62669	3.71553e-06	0.000279328	1580.62	1586.54	1592.64	1127.8	1264.8	1152.63
ENSMUSG00000014782	Plekhg4	TRUE	-0.810558	0.175305	-4.6237	3.76952e-06	0.000281948	939.296	1028.25	1213.82	682.404	479.12	653.488
ENSMUSG00000024737	Slc15a3	TRUE	-0.976206	0.211458	-4.61654	3.90189e-06	0.000290375	843.407	880.742	551.645	408.755	324.876	423.966
ENSMUSG00000062210	Tnfaip8	TRUE	-0.525104	0.114014	-4.60561	4.11249e-06	0.00030451	679.469	684.355	614.949	460.279	449.236	466.061
ENSMUSG00000035891	Cerk	TRUE	-0.658152	0.143374	-4.59045	4.42292e-06	0.000325859	909.395	865.306	1009.84	646.91	619.868	498.134
ENSMUSG00000017417	Plxdc1	TRUE	-1.70903	0.373423	-4.57667	4.72432e-06	0.000346333	178.373	140.644	272.306	83.583	35.6689	62.1415
ENSMUSG00000020184	Mdm2	TRUE	-0.516687	0.11317	-4.56557	4.98132e-06	0.000361427	7444.25	7509.04	6354.47	5305.8	5116.08	4473.19
ENSMUSG00000022885	St6gal1	TRUE	-0.547889	0.120024	-4.56484	4.99884e-06	0.000361427	1305.32	1352.42	1125.4	910.253	800.141	879.002
ENSMUSG00000021322	Aoah	TRUE	-0.818383	0.179322	-4.56377	5.02432e-06	0.000361427	230.957	245.27	203.978	131.672	128.215	126.288
ENSMUSG00000021803	Cdhr1	TRUE	-1.03551	0.226905	-4.5636	5.02834e-06	0.000361427	271.169	245.27	335.609	155.716	107.007	153.349
ENSMUSG00000051726	Kcnf1	TRUE	-1.8809	0.413106	-4.55308	5.28673e-06	0.000378155	47.4288	90.0467	87.4192	22.8995	16.3884	22.0502
ENSMUSG00000031264	Btk	TRUE	-0.764213	0.167891	-4.55184	5.31793e-06	0.000378549	285.604	280.431	243.166	149.991	166.776	159.363
ENSMUSG00000064373	Sepp1	TRUE	-0.65225	0.143378	-4.54917	5.38582e-06	0.000381538	5509.99	5041.76	6334.38	2989.52	3971.78	3780.61
ENSMUSG00000031169	Porcn	TRUE	-0.836641	0.184147	-4.54333	5.53724e-06	0.000390389	704.214	657.77	936.491	455.699	364.401	467.064
ENSMUSG00000030148	Clec4a2	TRUE	-0.786992	0.173429	-4.53782	5.68381e-06	0.000398814	347.467	332.744	292.402	214.11	184.129	166.379
ENSMUSG00000020032	Nuak1	TRUE	0.575894	0.127077	4.53184	5.84718e-06	0.000408333	2007.47	2149.97	1810.68	3006.7	3301.78	2588.9
ENSMUSG00000056724	Nbeal2	TRUE	-0.785723	0.17375	-4.52214	6.12163e-06	0.000425482	371.182	334.459	337.619	216.4	166.776	222.507
ENSMUSG00000026480	Ncf2	TRUE	-0.683804	0.151512	-4.51321	6.38526e-06	0.000441722	393.865	365.332	347.667	214.11	253.539	220.502
ENSMUSG00000035004	Igsf6	TRUE	-0.742943	0.164689	-4.51118	6.44684e-06	0.000443898	290.759	270.14	248.19	155.716	158.1	169.386
ENSMUSG00000048458	Fam212b	TRUE	-0.53695	0.119058	-4.51001	6.48258e-06	0.000444283	1081.58	1000.8	1180.66	802.626	752.903	693.58
ENSMUSG00000022686	B3gnt5	TRUE	0.594737	0.132021	4.50486	6.6416e-06	0.000453074	739.27	600.311	671.219	927.428	999.694	1106.52
ENSMUSG00000056888	Glipr1	TRUE	-0.92623	0.20624	-4.49103	7.08808e-06	0.000481303	5537.82	6094.88	4900.5	2332.31	3955.39	2411.49
ENSMUSG00000027947	Il6ra	TRUE	-0.866573	0.193036	-4.48917	7.15019e-06	0.000483294	378.399	289.865	387.86	170.601	187.985	219.5
ENSMUSG00000001687	Ubl3	TRUE	-0.415199	0.0927798	-4.4751	7.63742e-06	0.000513869	2044.59	1964.73	2041.79	1618.99	1508.7	1411.21
ENSMUSG00000040855	Reps2	TRUE	-0.804419	0.179969	-4.46977	7.83031e-06	0.000524453	270.138	221.258	269.291	153.426	144.604	137.313
ENSMUSG00000026548	Slamf9	TRUE	-0.918908	0.20596	-4.46159	8.13538e-06	0.00054242	214.46	248.7	204.983	112.207	103.151	138.315
ENSMUSG00000020029	Nudt4	TRUE	-0.677507	0.152041	-4.45608	8.34717e-06	0.000554034	7450.44	9047.55	8428.42	5736.31	5717.63	4132.41
ENSMUSG00000020788	Atp2a3	TRUE	-0.641147	0.143957	-4.45372	8.43938e-06	0.000557642	443.356	379.054	391.879	269.069	244.862	264.603
ENSMUSG00000039116	Gpr126	TRUE	-1.17028	0.262897	-4.45148	8.52805e-06	0.000560242	423.766	678.352	655.142	302.273	301.74	177.404
ENSMUSG00000038623	Tm6sf1	TRUE	-0.692332	0.155552	-4.45081	8.55477e-06	0.000560242	988.787	1022.24	748.59	601.111	578.415	529.205
ENSMUSG00000042842	Serpinb6b	TRUE	1.40425	0.315743	4.44744	8.68988e-06	0.000566572	115.479	57.4584	65.3132	243.879	219.798	165.377
ENSMUSG00000079186	Gzmc	TRUE	-1.62072	0.364755	-4.44331	8.85859e-06	0.000575028	82.4848	107.198	92.4433	27.4793	20.2445	44.1004
ENSMUSG00000036602	Alx1	TRUE	-7.03326	1.5845	-4.43879	9.04646e-06	0.000584647	118.572	23.1549	4.01927	0	0	1.00228
ENSMUSG00000001348	Acp5	TRUE	-1.91827	0.432707	-4.4332	9.28452e-06	0.000597413	210.336	83.186	95.4578	41.219	35.6689	26.0593
ENSMUSG00000025789	St8sia2	TRUE	-1.2082	0.273626	-4.4155	1.00776e-05	0.000645621	382.523	388.487	516.477	266.779	153.28	138.315
ENSMUSG00000021591	Glrx	TRUE	-0.637758	0.144568	-4.41147	1.0267e-05	0.000654911	880.525	936.486	866.154	475.164	603.48	644.468
ENSMUSG00000044811	AF251705	TRUE	-0.723991	0.164262	-4.40754	1.04551e-05	0.000664036	439.232	411.642	398.913	254.184	213.049	289.66
ENSMUSG00000059182	Skap2	TRUE	-0.437832	0.0993976	-4.40486	1.05854e-05	0.000669426	1665.16	1589.11	1663.98	1223.98	1294.69	1111.53
ENSMUSG00000035697	Hmha1	TRUE	-0.589396	0.13386	-4.40308	1.06722e-05	0.000672032	752.674	776.117	748.59	582.791	460.804	472.075
ENSMUSG00000027293	Ehd4	TRUE	-0.398818	0.0906316	-4.40043	1.08036e-05	0.000677407	2245.65	2079.65	2157.35	1699.14	1684.15	1533.49
ENSMUSG00000051457	Spn	TRUE	-0.984585	0.223862	-4.39818	1.09163e-05	0.000681574	149.504	177.521	170.819	97.3227	83.8702	71.1621
ENSMUSG00000030844	Rgs10	TRUE	-0.722339	0.1646	-4.38844	1.14169e-05	0.000709268	572.238	546.283	692.32	342.347	332.589	421.961
ENSMUSG00000040710	St8sia4	TRUE	-0.68844	0.156903	-4.38769	1.14561e-05	0.000709268	599.046	541.138	443.125	325.172	335.481	321.733
ENSMUSG00000014361	Mertk	TRUE	-0.562491	0.128278	-4.38495	1.16013e-05	0.000715254	753.705	701.507	655.142	451.119	453.092	524.194
ENSMUSG00000035873	Pawr	TRUE	0.672442	0.153468	4.38165	1.17783e-05	0.000722905	1919.83	1713.46	1432.87	2983.8	2813.99	2277.19
ENSMUSG00000040274	Cdk6	TRUE	-0.703419	0.160568	-4.38082	1.18236e-05	0.000722905	736.177	777.832	683.277	528.977	451.164	370.845
ENSMUSG00000041439	Mfsd6	TRUE	-0.756173	0.172706	-4.3784	1.19556e-05	0.000727955	652.661	666.346	494.371	377.841	383.682	312.712
ENSMUSG00000026880	Stom	TRUE	-0.444581	0.101888	-4.36341	1.28049e-05	0.000776464	2212.65	2400.39	2043.8	1680.82	1667.76	1544.52
ENSMUSG00000021676	Iqgap2	TRUE	-0.674691	0.155023	-4.35219	1.34787e-05	0.000813971	695.966	684.355	572.747	392.726	466.588	363.829
ENSMUSG00000036046	5031439G07Rik	TRUE	-0.350884	0.0807282	-4.34649	1.38336e-05	0.000830897	3619.02	3690.2	3519.88	2984.94	2697.34	2811.4
ENSMUSG00000006931	Leprel4	TRUE	0.35315	0.0812609	4.34588	1.38718e-05	0.000830897	2516.82	2339.5	2387.45	3193.33	3102.23	2956.73
ENSMUSG00000031740	Mmp2	TRUE	0.399033	0.0918661	4.34364	1.40141e-05	0.000836021	16949.6	16432.2	17382.4	23507.4	20142.3	23290
ENSMUSG00000000682	Cd52	TRUE	-0.728504	0.168643	-4.3198	1.56173e-05	0.000926786	389.741	439.942	367.764	241.589	208.229	273.623
ENSMUSG00000021596	Mctp1	TRUE	-0.82001	0.189853	-4.31918	1.56613e-05	0.000926786	269.107	209.251	225.079	140.832	128.215	129.294
ENSMUSG00000036242	3632451O06Rik	TRUE	0.835294	0.193722	4.31182	1.6192e-05	0.000951496	270.138	206.679	260.248	406.465	525.394	380.867
ENSMUSG00000031165	Was	TRUE	-0.654121	0.151712	-4.3116	1.6208e-05	0.000951496	360.871	323.311	313.503	223.27	199.553	211.482
ENSMUSG00000020399	Havcr2	TRUE	-0.904504	0.209857	-4.31009	1.6319e-05	0.00095421	252.61	216.112	286.373	125.947	118.575	158.361
ENSMUSG00000024679	Ms4a6d	TRUE	-0.703484	0.163284	-4.30835	1.64476e-05	0.000957925	532.027	445.088	529.539	297.693	354.761	271.619
ENSMUSG00000051439	Cd14	TRUE	-0.818155	0.190165	-4.30235	1.68999e-05	0.000980394	918.675	1079.7	657.151	499.208	497.437	510.162
ENSMUSG00000024663	Rab3il1	TRUE	-0.643479	0.149868	-4.29362	1.75781e-05	0.00101574	620.698	563.435	748.59	423.64	394.286	418.954
ENSMUSG00000030729	Pgm2l1	TRUE	-0.552992	0.128824	-4.29261	1.76586e-05	0.00101641	968.165	978.507	803.855	662.939	624.688	588.34
ENSMUSG00000021457	Syk	TRUE	-0.545158	0.127094	-4.2894	1.79158e-05	0.0010272	1180.56	1361.85	1084.2	887.354	795.32	804.833
ENSMUSG00000034612	Chst11	TRUE	-0.564966	0.131879	-4.28398	1.83578e-05	0.00104846	1301.2	1512.78	1624.79	891.934	1041.15	1066.43
ENSMUSG00000029762	Akr1b8	TRUE	-0.383048	0.0894773	-4.28095	1.86099e-05	0.00105876	1310.48	1336.12	1344.45	1054.52	970.773	1036.36
ENSMUSG00000043740	B430306N03Rik	TRUE	-0.776575	0.181617	-4.27588	1.90381e-05	0.00107644	284.573	290.722	244.171	144.267	181.237	152.347
ENSMUSG00000032366	Tpm1	TRUE	-0.522312	0.122163	-4.27555	1.90669e-05	0.00107644	46303.9	50010.2	59798.8	39332.1	34336.6	35026.8
ENSMUSG00000049988	Lrrc25	TRUE	-0.763572	0.178956	-4.26681	1.98283e-05	0.00111516	341.281	373.051	281.349	211.82	179.309	196.447
ENSMUSG00000021214	Akr1c18	TRUE	-2.3653	0.555124	-4.26085	2.0365e-05	0.00114098	55.6772	88.3315	172.829	13.7397	12.5323	35.0799
ENSMUSG00000078640	Gm11627	TRUE	1.79758	0.422467	4.25497	2.09074e-05	0.00116694	27.8386	16.2942	16.0771	64.1185	52.0573	92.21
ENSMUSG00000058818	Lilrb3	TRUE	-0.713063	0.167843	-4.24838	2.15322e-05	0.00119727	532.027	438.227	405.947	254.184	275.711	308.703
ENSMUSG00000041261	Car8	TRUE	-1.02582	0.241862	-4.24134	2.22188e-05	0.0012308	977.445	1413.3	1305.26	628.59	779.896	406.927
ENSMUSG00000062593	Lilrb4	TRUE	-0.775387	0.183766	-4.21943	2.44919e-05	0.00135164	1702.28	1624.27	1129.42	966.357	749.047	889.025
ENSMUSG00000073489	Ifi204	TRUE	-0.495493	0.117466	-4.21817	2.46289e-05	0.00135413	1477.51	1613.98	1377.61	973.227	1155.87	1040.37
ENSMUSG00000028197	Col24a1	TRUE	-1.24353	0.295033	-4.21488	2.49913e-05	0.00136895	219.616	337.89	255.224	72.1333	128.215	142.324
ENSMUSG00000026094	Stk17b	TRUE	-0.560779	0.13319	-4.21035	2.54972e-05	0.00138999	3113.8	3314.58	3418.39	2572.75	1875.99	2229.08
ENSMUSG00000058486	Wdr91	TRUE	-0.515169	0.122375	-4.20976	2.55641e-05	0.00138999	585.642	608.03	539.588	392.726	393.322	426.972
ENSMUSG00000078502	Gm13212	TRUE	1.92663	0.457875	4.20776	2.5791e-05	0.00139325	17.528	22.2973	11.053	81.2931	72.3019	41.0936
ENSMUSG00000005973	Rcn1	TRUE	0.317108	0.075366	4.20757	2.58131e-05	0.00139325	9405.33	9569.82	10141.6	12321.1	12400.3	11553.3
ENSMUSG00000044647	Csrnp3	TRUE	-1.74841	0.416826	-4.19458	2.73379e-05	0.00147016	47.4288	68.607	93.4481	25.1894	16.3884	21.0479
ENSMUSG00000038331	Satb2	TRUE	-0.602314	0.143833	-4.18759	2.81926e-05	0.00151061	2006.44	2398.67	2715.02	1635.02	1389.16	1666.8
ENSMUSG00000023918	Gpr115	TRUE	-3.26312	0.77947	-4.18633	2.83496e-05	0.00151352	19.5901	27.4428	54.2602	6.86984	1.92805	2.00457
ENSMUSG00000024781	Lipa	TRUE	-0.321588	0.0768433	-4.18498	2.85196e-05	0.0015171	5003.73	4989.44	4773.89	4033.74	4045.05	3738.51
ENSMUSG00000045180	Shroom2	TRUE	-1.0339	0.247339	-4.18009	2.91397e-05	0.00154451	163.939	131.211	140.675	59.5386	67.4817	85.194
ENSMUSG00000035413	Tmem98	TRUE	0.471953	0.113109	4.17255	3.01211e-05	0.0015908	774.326	808.705	716.436	1000.71	1035.36	1153.63
ENSMUSG00000042286	Stab1	TRUE	-0.998466	0.239447	-4.16988	3.04763e-05	0.00160381	13482.1	14818.3	14131.8	7736.58	9282.59	4219.61
ENSMUSG00000027546	Atp9a	TRUE	0.647246	0.155377	4.16566	3.10453e-05	0.00162795	801.134	747.816	679.257	960.632	1351.56	1175.68
ENSMUSG00000011148	Adssl1	TRUE	-0.781335	0.188118	-4.15343	3.27532e-05	0.00171141	234.051	232.406	188.906	124.802	125.323	131.299
ENSMUSG00000038560	Sp6	TRUE	-1.3904	0.335212	-4.14783	3.35649e-05	0.00174763	228.895	221.258	301.446	60.6835	78.086	147.336
ENSMUSG00000021822	Plau	TRUE	-0.669391	0.161481	-4.14533	3.39326e-05	0.00175036	6455.47	7250.05	5405.92	4369.22	4413.31	3235.37
ENSMUSG00000032122	Slc37a2	TRUE	-0.648769	0.156524	-4.14485	3.40035e-05	0.00175036	750.612	606.314	683.277	440.814	487.797	371.847
ENSMUSG00000053477	Tcf4	TRUE	-0.659713	0.159175	-4.14458	3.40439e-05	0.00175036	5391.41	6797.24	6142.46	4653.17	3763.55	3189.26
ENSMUSG00000033467	Crlf2	TRUE	0.887791	0.214222	4.14425	3.40924e-05	0.00175036	256.734	187.812	151.728	381.276	360.545	360.822
ENSMUSG00000030745	Il21r	TRUE	-0.856584	0.206856	-4.14097	3.45847e-05	0.00176393	280.448	243.555	194.935	129.382	127.251	140.32
ENSMUSG00000015766	Eps8	TRUE	-0.903587	0.218211	-4.14089	3.45963e-05	0.00176393	441.294	421.933	508.438	177.471	246.79	307.701
ENSMUSG00000032691	Nlrp3	TRUE	-0.902142	0.218632	-4.12631	3.68634e-05	0.00187304	538.213	487.967	330.585	269.069	213.049	244.557
ENSMUSG00000029468	P2rx7	TRUE	-1.11157	0.269746	-4.12081	3.77541e-05	0.00190649	267.045	413.357	381.831	144.267	220.762	126.288
ENSMUSG00000032322	Pstpip1	TRUE	-0.691601	0.167838	-4.12065	3.77804e-05	0.00190649	383.554	399.636	330.585	230.139	202.445	257.587
ENSMUSG00000074264	Amy1	TRUE	-1.2675	0.308793	-4.10469	4.04866e-05	0.00203608	88.6712	83.186	95.4578	41.219	26.9927	43.0982
ENSMUSG00000024770	Lipn	TRUE	-3.06766	0.748361	-4.09918	4.14622e-05	0.00207805	37.1182	24.87	16.0771	3.43492	2.89207	3.00685
ENSMUSG00000055148	Klf2	TRUE	0.547074	0.133527	4.09712	4.18328e-05	0.00208469	1065.09	817.281	939.505	1313.28	1487.49	1319
ENSMUSG00000023830	Igf2r	TRUE	0.639343	0.156078	4.09631	4.19797e-05	0.00208469	8281.47	7010.78	7309.05	13719.1	12239.3	9246.06
ENSMUSG00000068735	Trp53i11	TRUE	-0.685161	0.1673	-4.09541	4.2143e-05	0.00208469	859.904	1149.17	839.023	575.921	536.962	659.502
ENSMUSG00000028459	Cd72	TRUE	-0.64572	0.157673	-4.09531	4.21607e-05	0.00208469	1240.37	1339.55	1034.96	701.868	705.666	903.057
ENSMUSG00000024130	Abca3	TRUE	-0.796361	0.194656	-4.09113	4.29275e-05	0.00211046	390.772	476.819	487.337	201.515	295.956	281.641
ENSMUSG00000070034	Sp110	TRUE	-0.957175	0.233979	-4.09086	4.2978e-05	0.00211046	149.504	144.075	144.694	60.6835	75.1939	89.2032
ENSMUSG00000023913	Pla2g7	TRUE	-1.00283	0.245183	-4.09014	4.31114e-05	0.00211046	119.603	147.505	169.814	68.6984	80.0141	69.1575
ENSMUSG00000040848	Sft2d2	TRUE	-0.48834	0.11956	-4.0845	4.41726e-05	0.00214893	740.301	745.244	848.067	589.661	529.25	545.242
ENSMUSG00000025909	Sntg1	TRUE	-3.26061	0.798307	-4.08441	4.41891e-05	0.00214893	36.0871	29.158	98.4722	2.28995	12.5323	2.00457
ENSMUSG00000053799	Exoc6	TRUE	-0.761967	0.187093	-4.07267	4.6477e-05	0.00225276	200.026	206.679	209.002	128.237	105.079	130.297
ENSMUSG00000035799	Twist1	TRUE	-0.593388	0.146783	-4.04263	5.28546e-05	0.00255348	949.606	926.195	1227.89	644.62	705.666	705.607
ENSMUSG00000063931	Pepd	TRUE	-0.411758	0.101931	-4.03959	5.35453e-05	0.0025784	982.6	992.229	912.375	737.362	689.278	744.696
ENSMUSG00000019838	Slc16a10	TRUE	-0.765381	0.189856	-4.03138	5.54509e-05	0.00266146	493.878	511.122	346.662	253.039	277.639	264.603
ENSMUSG00000020189	Osbpl8	TRUE	-0.381596	0.0948706	-4.02228	5.76364e-05	0.00275738	5158.39	4973.15	4591.02	4015.42	3779.94	3506.99
ENSMUSG00000040133	Gpr176	TRUE	0.369577	0.0920743	4.0139	5.97238e-05	0.002848	2496.2	2402.1	2319.12	3311.26	3132.12	2882.56
ENSMUSG00000036564	Ndrg4	TRUE	0.344081	0.0857895	4.01075	6.05256e-05	0.00287692	2840.57	2936.38	2809.47	3580.33	3885.02	3433.82
ENSMUSG00000026239	Pde6d	TRUE	0.471582	0.117682	4.00725	6.14286e-05	0.00291045	557.804	492.255	534.563	681.259	761.58	751.712
ENSMUSG00000050953	Gja1	TRUE	-0.696785	0.17393	-4.00612	6.17248e-05	0.00291511	19800.5	13940.1	17025.6	9846.76	8805.4	12666.8
ENSMUSG00000015850	Adamtsl4	TRUE	-0.714667	0.178572	-4.00212	6.27785e-05	0.0029554	2227.09	3179.93	3243.55	1615.56	2068.8	1586.61
ENSMUSG00000086429	Gt(ROSA)26Sor	FALSE	0.793455	0.198628	3.99468	6.47824e-05	0.00304003	3765.43	6266.39	4171	9539.91	7386.36	7694.52
ENSMUSG00000027239	Mdk	TRUE	1.62557	0.407221	3.99187	6.55543e-05	0.00305574	128.883	150.078	97.4674	373.261	168.704	620.413
ENSMUSG00000032265	Fam46a	TRUE	-0.682792	0.171072	-3.99125	6.57254e-05	0.00305574	2220.9	2336.93	1792.6	1444.96	1040.18	1472.35
ENSMUSG00000071076	Jund	TRUE	0.624859	0.156559	3.9912	6.57394e-05	0.00305574	933.109	669.776	669.209	1182.76	1167.43	1151.62
ENSMUSG00000034708	Grn	TRUE	-0.503859	0.126293	-3.9896	6.61845e-05	0.00306675	8843.4	9153.89	10327.5	5794.71	6606.46	7572.25
ENSMUSG00000022676	Snai2	TRUE	0.378879	0.0950357	3.98671	6.6997e-05	0.00309124	3528.29	3361.74	3217.43	4061.22	4728.54	4350.91
ENSMUSG00000045441	Gprin3	TRUE	1.06988	0.268394	3.98623	6.71325e-05	0.00309124	442.325	255.561	202.973	648.055	658.429	583.328
ENSMUSG00000024529	Lox	TRUE	0.654925	0.164382	3.98417	6.77161e-05	0.0031084	185489	149135	142949	197291	277217	277443
ENSMUSG00000039252	Lgi2	TRUE	-3.45749	0.867982	-3.98337	6.79452e-05	0.00310923	22.6833	18.8669	98.4722	8.01481	1.92805	3.00685
ENSMUSG00000026110	Mgat4a	TRUE	-0.583324	0.146489	-3.98204	6.83273e-05	0.00311703	370.151	407.354	374.797	243.879	283.423	241.55
ENSMUSG00000073411	H2-D1	TRUE	-0.686525	0.172464	-3.98068	6.87195e-05	0.00312525	5691.45	4639.55	7293.98	3244.85	3732.7	3972.05
ENSMUSG00000031101	Sash3	TRUE	-0.84735	0.213186	-3.97469	7.04697e-05	0.00319499	160.845	172.375	204.983	88.1629	102.187	108.247
ENSMUSG00000040430	Pitpnc1	TRUE	-0.56274	0.141761	-3.96964	7.19825e-05	0.00324829	986.724	1154.31	978.693	615.995	697.954	797.817
ENSMUSG00000031490	Eif4ebp1	TRUE	0.574282	0.14469	3.96904	7.21613e-05	0.00324829	1550.71	1170.61	1292.2	2239.57	1923.23	1812.13
ENSMUSG00000040345	Arhgap9	TRUE	-0.814283	0.205183	-3.96857	7.23066e-05	0.00324829	220.647	168.087	182.877	106.482	112.791	105.24
ENSMUSG00000045404	Kcnk13	TRUE	-0.917571	0.231876	-3.95716	7.58461e-05	0.00339694	205.181	192.957	155.747	113.352	100.259	80.1826
ENSMUSG00000053687	Dpep2	TRUE	-0.654539	0.165442	-3.9563	7.61211e-05	0.00339892	578.425	540.28	418.005	312.578	327.768	335.765
ENSMUSG00000029082	Bst1	TRUE	-1.36119	0.344217	-3.95446	7.67075e-05	0.00341476	168.063	203.248	109.525	53.8137	47.2372	86.1963
ENSMUSG00000063160	Numbl	TRUE	0.386032	0.0978395	3.94556	7.96126e-05	0.00353341	1408.43	1244.36	1306.26	1790.74	1631.13	1750.99
ENSMUSG00000015947	Fcgr1	TRUE	-0.770669	0.195709	-3.93783	8.22227e-05	0.00363829	222.709	252.988	299.436	140.832	168.704	144.329
ENSMUSG00000048696	Mex3d	TRUE	0.45527	0.115674	3.9358	8.29186e-05	0.00365477	1055.81	1023.1	995.775	1559.45	1401.69	1255.86
ENSMUSG00000029333	Rasgef1b	TRUE	-1.15773	0.29419	-3.9353	8.30912e-05	0.00365477	405.207	467.385	240.152	217.545	135.927	146.333
ENSMUSG00000055200	Sertad3	TRUE	0.768905	0.195987	3.92323	8.7368e-05	0.00383145	170.125	132.926	180.867	307.998	266.071	249.568
ENSMUSG00000041607	Mbp	TRUE	-0.609059	0.155319	-3.92135	8.80554e-05	0.00385014	275.293	268.425	297.426	190.065	187.985	173.395
ENSMUSG00000036030	Prtg	TRUE	-0.965923	0.246512	-3.91836	8.91535e-05	0.00388662	141.255	212.682	183.882	91.5978	80.0141	104.237
ENSMUSG00000016087	Fli1	TRUE	-0.531155	0.135639	-3.91595	9.00473e-05	0.003914	478.412	460.525	485.327	311.433	365.365	307.701
ENSMUSG00000026825	Dnm1	TRUE	-0.791424	0.20224	-3.91329	9.10469e-05	0.0039451	393.865	501.689	521.501	290.823	213.049	315.719
ENSMUSG00000090210	Itga10	TRUE	0.972409	0.248531	3.91262	9.12983e-05	0.0039451	345.405	184.381	216.036	427.075	546.602	487.109
ENSMUSG00000055866	Per2	TRUE	-0.538334	0.137654	-3.91077	9.2001e-05	0.00396385	407.269	426.221	478.294	287.388	306.56	308.703
ENSMUSG00000034457	Eda2r	TRUE	-0.304751	0.0779662	-3.90876	9.27712e-05	0.00397491	2386.9	2277.75	2430.66	1929.28	1878.88	1935.41
ENSMUSG00000015852	Fcrls	TRUE	-0.990553	0.253423	-3.90869	9.27972e-05	0.00397491	1620.83	1235.78	2319.12	1020.17	957.277	627.429
ENSMUSG00000032788	Pdxk	TRUE	-0.468095	0.119934	-3.90295	9.50283e-05	0.00405867	1009.41	865.306	1014.87	650.344	729.767	706.609
ENSMUSG00000049037	Clec4a1	TRUE	-0.8617	0.220848	-3.90177	9.54902e-05	0.00406661	166.001	209.251	155.747	97.3227	105.079	90.2054
ENSMUSG00000019970	Sgk1	TRUE	-0.897097	0.230112	-3.89851	9.67845e-05	0.00410986	4961.46	7766.31	4466.42	2325.44	3529.29	3377.69
ENSMUSG00000034947	Tmem106a	TRUE	-0.557075	0.14307	-3.89373	9.87125e-05	0.00417968	1316.66	1532.51	1701.16	913.688	1028.61	1149.62
ENSMUSG00000030047	Arhgap25	TRUE	-0.798171	0.205207	-3.88959	0.000100415	0.00423959	198.995	184.381	183.882	123.657	112.791	90.2054
ENSMUSG00000074622	Mafb	TRUE	-1.03817	0.267025	-3.88791	0.00010111	0.00425675	715.556	607.172	640.069	460.279	290.171	206.47
ENSMUSG00000078570	1110065P20Rik	TRUE	0.755642	0.194626	3.88253	0.000103375	0.00433971	159.814	123.493	124.597	211.82	247.754	227.518
ENSMUSG00000021384	Susd3	TRUE	-0.948103	0.244284	-3.88114	0.000103967	0.00435216	152.597	114.059	149.718	72.1333	78.086	65.1484
ENSMUSG00000054263	Lifr	TRUE	-0.960536	0.247721	-3.87749	0.000105541	0.00440552	7917.51	4974.87	11060	4729.88	3785.73	3792.64
ENSMUSG00000020308	Tpgs1	TRUE	0.780479	0.201441	3.87448	0.000106853	0.00444768	252.61	195.53	158.761	332.042	355.725	353.806
ENSMUSG00000026357	Rgs18	TRUE	-1.03127	0.266333	-3.87208	0.000107909	0.004479	113.417	92.6195	101.487	57.2486	44.3451	49.1118
ENSMUSG00000028487	Bnc2	TRUE	-1.11322	0.287921	-3.8664	0.000110454	0.00456612	137.131	257.276	228.094	104.193	80.9781	103.235
ENSMUSG00000002699	Lcp2	TRUE	-0.559329	0.144678	-3.86601	0.000110628	0.00456612	524.81	460.525	453.173	361.811	310.416	304.694
ENSMUSG00000063193	Cd300lb	TRUE	-0.879458	0.227656	-3.86309	0.00011196	0.00460817	752.674	578.014	476.284	404.175	317.164	261.596
ENSMUSG00000036944	Tmem71	TRUE	-1.17811	0.305048	-3.86206	0.000112437	0.00460817	100.013	74.6101	76.3662	41.219	34.7049	35.0799
ENSMUSG00000003283	Hck	TRUE	-0.634753	0.164372	-3.86169	0.000112607	0.00460817	334.063	310.447	381.831	239.299	200.517	221.504
ENSMUSG00000021189	Atxn3	TRUE	-0.389159	0.100791	-3.86106	0.000112898	0.00460817	875.37	913.331	923.428	658.359	688.314	723.648
ENSMUSG00000037679	Inf2	TRUE	-0.436316	0.113125	-3.85693	0.000114818	0.00466321	7449.41	9260.23	7853.66	5895.46	5786.08	6472.74
ENSMUSG00000060131	Atp8b4	TRUE	-0.657357	0.170441	-3.8568	0.000114879	0.00466321	1077.46	1330.12	926.443	622.865	794.356	696.586
ENSMUSG00000021559	Dapk1	TRUE	-0.638593	0.165705	-3.85379	0.000116304	0.00470806	1499.16	1754.62	1512.25	880.484	915.824	1264.88
ENSMUSG00000022415	Syngr1	TRUE	-1.38964	0.360796	-3.85159	0.000117353	0.00473751	92.7954	79.7556	88.424	49.2338	27.9567	23.0525
ENSMUSG00000058152	Chsy3	TRUE	0.799706	0.208065	3.84354	0.00012127	0.00488228	319.629	296.725	257.234	618.285	521.537	381.87
ENSMUSG00000031825	Crispld2	TRUE	1.02641	0.267198	3.84138	0.000122347	0.00490854	44.3356	56.6008	44.212	93.8878	96.4025	106.242
ENSMUSG00000068196	Col8a1	TRUE	-0.897081	0.233561	-3.84089	0.000122589	0.00490854	19074.6	19511	31553.3	14510.2	9060.87	14092.1
ENSMUSG00000055322	Tns1	TRUE	0.71272	0.185913	3.83362	0.000126271	0.0050423	2635.39	2402.1	1717.23	3606.66	3130.19	4333.87
ENSMUSG00000056091	St3gal5	TRUE	-0.495059	0.129169	-3.83264	0.000126775	0.00504874	1832.19	1899.56	1606.7	1434.65	1210.82	1144.61
ENSMUSG00000001128	Cfp	TRUE	-0.720823	0.188404	-3.82595	0.000130271	0.00517397	1535.25	1394.44	957.592	764.842	725.911	867.977
ENSMUSG00000089762	Ier5l	TRUE	1.39609	0.36509	3.82397	0.000131322	0.00520168	135.069	53.1704	57.2747	242.734	204.373	197.45
ENSMUSG00000035273	Hpse	TRUE	0.604336	0.158079	3.82299	0.000131843	0.00520834	496.971	418.503	577.771	768.277	686.386	813.853
ENSMUSG00000033220	Rac2	TRUE	-0.717633	0.187928	-3.81865	0.000134182	0.00528654	554.71	489.683	383.841	296.548	253.539	318.726
ENSMUSG00000021306	Gpr137b	TRUE	-0.606417	0.158965	-3.81477	0.000136309	0.00535605	289.728	275.286	266.277	196.935	182.201	167.381
ENSMUSG00000040254	Sema3d	TRUE	0.950677	0.249348	3.81265	0.000137487	0.00538008	383.554	361.902	224.075	502.643	787.608	583.328
ENSMUSG00000037110	Ralgapa2	TRUE	-0.579171	0.15192	-3.81235	0.000137651	0.00538008	875.37	878.17	748.59	542.717	483.94	648.477
ENSMUSG00000039936	Pik3cd	TRUE	-0.535914	0.140638	-3.81059	0.000138633	0.00540414	344.374	364.475	349.677	225.56	256.431	247.564
ENSMUSG00000056413	Adap1	TRUE	-0.806177	0.211776	-3.80674	0.000140809	0.00547446	164.97	160.369	141.679	99.6126	83.8702	84.1917
ENSMUSG00000036918	Ttc7	TRUE	-0.418792	0.110211	-3.79992	0.000144745	0.00561269	1083.64	1233.21	1154.54	803.771	921.608	870.984
ENSMUSG00000019539	Rcn3	TRUE	0.321136	0.0845487	3.79824	0.00014573	0.00563602	8780.51	8822.86	8101.85	10505.1	10221.6	11387.9
ENSMUSG00000037685	Atp8a1	TRUE	-0.717459	0.189244	-3.79118	0.000149935	0.00578349	327.877	295.868	279.34	156.861	218.834	172.393
ENSMUSG00000036766	Dner	TRUE	1.78951	0.472136	3.79025	0.000150494	0.00578989	54.6462	43.737	44.212	95.0327	300.776	96.2191
ENSMUSG00000081534	Slc48a1	TRUE	-0.35602	0.0939538	-3.78931	0.000151068	0.00579684	3225.16	3319.72	3643.47	2805.18	2640.46	2515.73
ENSMUSG00000034614	Pik3ip1	TRUE	0.497079	0.131204	3.78859	0.000151507	0.00579858	602.139	547.998	699.354	913.688	842.558	852.943
ENSMUSG00000033208	S100b	TRUE	-0.581372	0.153726	-3.78188	0.000155651	0.00594175	833.097	746.959	782.754	444.249	511.897	621.415
ENSMUSG00000001507	Itga3	TRUE	-0.974759	0.258335	-3.77324	0.000161143	0.00612044	836.19	1454.47	1300.24	800.336	585.163	443.009
ENSMUSG00000049775	Tmsb4x	TRUE	-0.381699	0.10116	-3.77321	0.000161163	0.00612044	26029.1	28992.5	24769.8	21557.5	18751.2	20936.7
ENSMUSG00000042821	Snai1	TRUE	0.980373	0.260018	3.77041	0.000162981	0.0061728	870.215	523.128	687.296	1909.81	1141.41	1053.4
ENSMUSG00000047180	Neurl3	TRUE	-0.669002	0.177464	-3.7698	0.000163379	0.0061728	296.945	251.273	283.359	195.79	153.28	174.397
ENSMUSG00000070469	Adamtsl3	TRUE	-0.577046	0.153375	-3.76233	0.00016834	0.00634367	2255.96	2391.81	2964.21	1447.25	1912.63	1740.96
ENSMUSG00000074480	Mex3a	TRUE	0.457406	0.121596	3.7617	0.000168763	0.00634367	1268.2	1482.77	1335.4	2097.59	1794.05	1722.92
ENSMUSG00000052821	Cysltr1	TRUE	-0.713108	0.189767	-3.75781	0.000171407	0.00642668	313.442	401.351	302.45	188.92	235.222	196.447
ENSMUSG00000020709	Adap2	TRUE	-0.641566	0.170858	-3.75497	0.000173364	0.00648356	229.926	204.963	228.094	137.397	142.676	144.329
ENSMUSG00000036353	P2ry12	TRUE	-0.953867	0.254072	-3.75432	0.000173812	0.00648384	157.752	142.36	185.891	97.3227	90.6183	63.1438
ENSMUSG00000066151	Fkbp15	TRUE	-0.282534	0.075305	-3.75187	0.000175522	0.00653111	1962.11	1959.59	1933.27	1588.08	1619.56	1605.66
ENSMUSG00000033576	Apol6	TRUE	-0.723345	0.192904	-3.74976	0.000177001	0.00656956	308.287	394.49	463.221	230.139	223.654	252.575
ENSMUSG00000025534	Gusb	TRUE	-0.303829	0.0811076	-3.746	0.000179676	0.00665209	4018.04	4066.68	3791.18	3069.67	3357.7	3192.27
ENSMUSG00000033361	Prrg3	TRUE	2.04887	0.547341	3.74332	0.000181602	0.00670653	12.3727	12.8638	38.1831	46.9439	107.007	107.244
ENSMUSG00000039153	Runx2	TRUE	-0.431512	0.115526	-3.73519	0.000187573	0.00690856	5589.38	5202.98	5776.7	4677.21	3869.6	3740.52
ENSMUSG00000021215	Net1	TRUE	-0.81242	0.217539	-3.7346	0.00018801	0.00690856	2329.16	2706.55	2946.13	1132.38	1336.14	2075.73
ENSMUSG00000058099	Nfam1	TRUE	-0.5971	0.16079	-3.71354	0.000204379	0.00749137	934.14	941.631	679.257	563.327	591.911	534.217
ENSMUSG00000031099	Smarca1	TRUE	0.711149	0.191782	3.70812	0.000208806	0.00763464	504.188	447.661	371.783	810.641	792.428	564.285
ENSMUSG00000021388	Aspn	TRUE	2.47947	0.669127	3.70552	0.000210956	0.00769414	8024.74	3098.46	4877.39	52155.8	19431.8	17645.2
ENSMUSG00000026872	Zeb2	TRUE	-0.320257	0.0865969	-3.69825	0.000217094	0.00789848	11079.8	12224.9	10983.7	8749.88	9053.16	9660
ENSMUSG00000035131	Fam5c	TRUE	-2.92189	0.790466	-3.69642	0.00021866	0.00793583	46.3977	36.0187	213.022	13.7397	22.1726	3.00685
ENSMUSG00000030162	Olr1	TRUE	4.7393	1.28401	3.69103	0.000223349	0.0080861	3.09318	0	0	5.72486	47.2372	26.0593
ENSMUSG00000000567	Sox9	TRUE	0.780468	0.212036	3.68082	0.000232482	0.00839612	874.339	614.89	645.094	981.242	1121.16	1561.56
ENSMUSG00000022324	Matn2	TRUE	-0.509104	0.138349	-3.67984	0.000233381	0.00840798	1014.56	796.699	862.134	606.835	590.947	679.548
ENSMUSG00000026360	Rgs2	TRUE	-0.65199	0.17733	-3.6767	0.000236268	0.00849124	807.32	1084.85	862.134	484.323	677.709	590.344
ENSMUSG00000041444	Arhgap32	TRUE	0.506395	0.137805	3.67472	0.000238106	0.00853649	303.132	291.58	260.248	405.32	388.502	420.959
ENSMUSG00000029335	Bmp3	TRUE	-4.85169	1.32326	-3.66648	0.000245916	0.00879508	47.4288	23.1549	275.32	9.15978	0.964025	2.00457
ENSMUSG00000004709	Cd244	TRUE	-1.1488	0.313724	-3.66181	0.000250438	0.00891402	119.603	161.226	139.67	76.7132	39.525	74.1689
ENSMUSG00000047777	Phf13	TRUE	0.448345	0.122438	3.6618	0.000250452	0.00891402	769.171	671.491	837.014	1005.29	1085.49	1014.31
ENSMUSG00000036469	March1	TRUE	-0.582453	0.159145	-3.65988	0.000252334	0.00895937	243.33	249.558	245.176	172.891	155.208	165.377
ENSMUSG00000052957	Gas1	TRUE	-0.799024	0.218741	-3.65284	0.000259358	0.00918664	2274.52	2431.26	3197.33	1580.06	1066.21	1896.32
ENSMUSG00000048706	Lurap1l	TRUE	-0.355359	0.0973548	-3.65014	0.000262097	0.00926138	3074.62	3036.72	3044.6	2160.56	2588.41	2405.48
ENSMUSG00000044162	Tnip3	TRUE	-0.679787	0.18676	-3.63989	0.000272754	0.00960152	285.604	324.168	259.243	177.471	158.1	207.473
ENSMUSG00000030319	Cand2	TRUE	0.637107	0.175063	3.63929	0.000273387	0.00960152	290.759	280.431	217.041	361.811	436.703	426.972
ENSMUSG00000027995	Tlr2	TRUE	-0.557984	0.153333	-3.63902	0.000273677	0.00960152	456.76	408.212	499.395	326.317	274.747	325.742
ENSMUSG00000029465	Arpc3	TRUE	-0.260916	0.0717815	-3.63487	0.000278124	0.00973436	4156.2	4186.74	4163.97	3341.03	3589.06	3505.98
ENSMUSG00000028217	Cdh17	TRUE	-1.99503	0.549499	-3.63064	0.000282718	0.00986894	40.2113	40.3066	105.506	16.0296	10.6043	20.0457
ENSMUSG00000030583	Sipa1l3	TRUE	-0.301236	0.0829828	-3.6301	0.000283309	0.00986894	1819.82	1818.09	1816.71	1544.57	1466.28	1417.23
ENSMUSG00000052854	Nrk	TRUE	2.43819	0.671842	3.62911	0.000284395	0.00988338	38.1492	6.8607	9.04337	42.364	131.107	117.267
ENSMUSG00000073418	C4b	TRUE	-1.02564	0.283223	-3.62131	0.00029311	0.0101623	214.46	121.777	183.882	75.5682	80.0141	99.226
ENSMUSG00000056515	Rab31	TRUE	-0.289695	0.0800218	-3.62021	0.000294366	0.0101629	3656.14	3779.39	3888.65	3217.37	2936.42	3112.09
ENSMUSG00000041058	Wwp1	TRUE	-0.421482	0.116429	-3.62009	0.000294506	0.0101629	2176.57	2081.37	2399.51	1819.36	1666.8	1485.38
ENSMUSG00000019088	Dnase1l1	TRUE	-0.474429	0.131131	-3.61797	0.000296922	0.0102223	451.604	476.819	427.048	324.027	344.157	307.701
ENSMUSG00000035011	Zbtb7a	TRUE	0.288837	0.0798913	3.61537	0.00029992	0.010295	1917.77	1854.96	1901.12	2414.75	2241.36	2276.18
ENSMUSG00000095098	Ccdc85b	TRUE	0.996345	0.275648	3.61456	0.000300858	0.010295	162.907	129.496	101.487	183.196	302.704	298.68
ENSMUSG00000034854	Mfsd12	TRUE	-0.459262	0.127067	-3.61433	0.000301131	0.010295	700.09	584.017	603.896	451.119	454.056	467.064
ENSMUSG00000042476	Abcb4	TRUE	-1.00339	0.277766	-3.61237	0.000303406	0.0103488	143.317	134.641	119.573	46.9439	67.4817	83.1895
ENSMUSG00000034177	Rnf43	TRUE	-2.0827	0.576916	-3.61006	0.00030613	0.0104176	36.0871	43.737	105.506	19.4645	16.3884	8.01826
ENSMUSG00000031824	6430548M08Rik	TRUE	-0.745655	0.206906	-3.60384	0.000313554	0.0106425	244.361	266.71	198.954	135.107	126.287	162.37
ENSMUSG00000075334	Rprm	TRUE	-2.05274	0.56968	-3.60332	0.000314184	0.0106425	54.6462	42.0218	104.501	26.3344	15.4244	7.01598
ENSMUSG00000091345	Col6a5	TRUE	-5.61746	1.56003	-3.60088	0.000317147	0.0107183	9.27954	7.71829	11.053	0	0	0
ENSMUSG00000030720	Cln3	TRUE	-0.593867	0.165104	-3.59692	0.000322006	0.0108576	304.163	293.295	263.262	169.456	197.625	202.461
ENSMUSG00000005107	Slc2a9	TRUE	-0.486973	0.136107	-3.57786	0.00034642	0.0116541	360.871	339.605	342.643	253.039	251.61	239.546
ENSMUSG00000041515	Irf8	TRUE	-0.669365	0.187138	-3.57685	0.000347757	0.0116724	226.833	244.412	304.46	159.151	160.992	167.381
ENSMUSG00000034484	Snx2	TRUE	-0.337468	0.0943825	-3.57553	0.00034952	0.011705	4243.84	3990.36	3697.73	3148.67	3313.35	2980.79
ENSMUSG00000046245	Pilra	TRUE	-0.797995	0.223291	-3.57379	0.000351857	0.0117565	456.76	560.862	344.653	266.779	217.87	299.683
ENSMUSG00000053158	Fes	TRUE	-0.459122	0.128516	-3.57247	0.000353624	0.0117888	1193.97	1413.3	1245.97	827.815	952.456	1022.33
ENSMUSG00000022180	Slc7a8	TRUE	-0.565108	0.158218	-3.5717	0.000354677	0.0117972	2581.77	2988.69	1966.43	1683.11	1736.21	1675.82
ENSMUSG00000015968	Cacna1d	TRUE	-0.719258	0.20147	-3.57006	0.000356904	0.0118445	190.746	182.666	194.935	115.642	132.071	97.2214
ENSMUSG00000055407	Map6	TRUE	0.530264	0.148614	3.56806	0.000359631	0.0119082	566.052	617.463	628.012	952.617	720.127	945.153
ENSMUSG00000037940	Inpp4b	TRUE	-0.831465	0.233108	-3.56686	0.000361282	0.0119361	163.939	124.35	154.742	73.2782	90.6183	84.1917
ENSMUSG00000026494	Kif26b	TRUE	-1.30591	0.366869	-3.55961	0.000371408	0.0122432	692.872	1276.09	595.857	218.69	545.638	272.621
ENSMUSG00000079111	Kdelr2	TRUE	0.283849	0.0797643	3.5586	0.000372833	0.0122627	6103.88	5623.2	5502.39	7221.34	6867.71	6886.68
ENSMUSG00000093098	Gm22641	FALSE	1.18242	0.332434	3.55686	0.000375314	0.0123168	45.3666	36.8763	39.1879	80.1481	122.431	72.1643
ENSMUSG00000028378	Ptgr1	TRUE	-0.362988	0.102232	-3.55062	0.000384327	0.0125846	1364.09	1553.09	1376.6	1084.29	1162.61	1092.49
ENSMUSG00000024664	Fads3	TRUE	0.291922	0.0822452	3.54942	0.000386087	0.0125955	4190.23	3803.4	3907.74	5003.53	4923.27	4642.57
ENSMUSG00000016128	Stard13	TRUE	-0.39622	0.111649	-3.5488	0.000386988	0.0125955	1507.41	1769.2	1500.19	1150.7	1210.82	1268.89
ENSMUSG00000028047	Thbs3	TRUE	0.754468	0.212616	3.5485	0.000387427	0.0125955	484.598	468.243	365.754	861.019	826.169	538.226
ENSMUSG00000030268	Bcat1	TRUE	0.321278	0.0905502	3.54806	0.000388079	0.0125955	3113.8	3299.14	3611.32	4299.37	4159.77	4066.26
ENSMUSG00000050052	2610019F03Rik	TRUE	0.988878	0.278796	3.54696	0.000389708	0.0126059	55.6772	63.4615	64.3084	105.337	155.208	103.235
ENSMUSG00000032946	Rasgrp2	TRUE	-1.2067	0.340234	-3.54668	0.000390111	0.0126059	78.3606	61.7463	73.3518	24.0444	28.9207	39.089
ENSMUSG00000033282	Rpgrip1l	TRUE	-0.457819	0.129256	-3.54195	0.000397188	0.0128065	1642.48	1946.72	2033.75	1242.3	1344.81	1506.43
ENSMUSG00000055235	Wdr86	TRUE	-2.2977	0.648931	-3.54074	0.000399	0.0128368	24.7454	29.158	21.1012	2.28995	6.74817	6.0137
ENSMUSG00000029175	Slc35f6	TRUE	-0.326533	0.0922535	-3.53951	0.000400863	0.0128658	1307.38	1297.53	1308.27	1104.9	1023.79	993.262
ENSMUSG00000079018	Ly6c1	TRUE	0.45196	0.127709	3.539	0.000401645	0.0128658	1146.54	1160.32	1070.13	1504.49	1354.45	1761.01
ENSMUSG00000036594	H2-Aa	TRUE	-4.20329	1.1885	-3.53663	0.000405261	0.0129534	8.24848	35.1611	57.2747	5.72486	0	0
ENSMUSG00000025044	Msr1	TRUE	-0.576147	0.163188	-3.53058	0.000414654	0.013225	3539.63	3757.95	2531.14	2041.49	2146.88	2404.48
ENSMUSG00000022240	Ctnnd2	TRUE	-0.883044	0.250346	-3.52729	0.000419842	0.0133472	152.597	193.815	151.728	96.1777	69.4098	105.24
ENSMUSG00000040528	Milr1	TRUE	-0.762611	0.216221	-3.527	0.000420298	0.0133472	306.225	320.738	219.05	161.441	188.949	148.338
ENSMUSG00000022181	C6	TRUE	-3.30067	0.937073	-3.52232	0.00042779	0.0135559	23.7144	16.2942	11.053	2.28995	1.92805	1.00228
ENSMUSG00000035158	Mitf	TRUE	-0.573354	0.1629	-3.51966	0.000432103	0.0136561	517.592	433.939	421.019	267.924	341.265	311.71
ENSMUSG00000063430	Wscd2	TRUE	1.89415	0.53823	3.51923	0.000432806	0.0136561	6.18636	11.1486	12.0578	45.7989	24.1006	40.0913
ENSMUSG00000025006	Sorbs1	TRUE	-0.462394	0.13143	-3.51818	0.00043451	0.0136806	2390	3213.38	2704.97	2128.5	1944.44	1959.46
ENSMUSG00000044345	Marveld1	TRUE	0.311917	0.088714	3.51599	0.000438125	0.013765	1915.71	1728.9	1852.89	2190.33	2369.57	2261.15
ENSMUSG00000046079	Lrrc8d	TRUE	-0.679548	0.193362	-3.51438	0.000440789	0.0138192	363.964	390.202	332.595	280.518	210.157	189.431
ENSMUSG00000058755	Osm	TRUE	-1.53156	0.43591	-3.51347	0.0004423	0.0138371	77.3295	61.7463	36.1735	18.3196	23.1366	19.0434
ENSMUSG00000022969	Il10rb	TRUE	-0.419225	0.119453	-3.50956	0.000448857	0.0140125	845.469	880.742	975.679	632.025	729.767	657.497
ENSMUSG00000025582	Nptx1	TRUE	-1.92837	0.551874	-3.49423	0.000475435	0.0148109	78.3606	103.768	59.2843	32.0592	5.78415	26.0593
ENSMUSG00000019647	Sema6a	TRUE	-1.59985	0.457936	-3.49361	0.000476541	0.014814	84.5469	69.4646	210.007	41.219	34.7049	44.1004
ENSMUSG00000040118	Cacna2d1	TRUE	0.320489	0.0918264	3.49016	0.000482728	0.0149747	2168.32	2142.25	2225.67	2798.31	2867.01	2496.69
ENSMUSG00000059901	Adamts14	TRUE	-0.612683	0.175652	-3.48805	0.000486548	0.0150615	458.822	592.593	529.539	409.9	314.272	311.71
ENSMUSG00000028036	Ptgfr	TRUE	-1.09057	0.313052	-3.48367	0.000494584	0.0152782	1089.83	1071.98	1096.26	245.024	559.134	724.65
ENSMUSG00000031565	Fgfr1	TRUE	-0.385294	0.11071	-3.48021	0.000501014	0.0154444	6520.42	6261.25	7823.52	5333.28	5073.66	5368.23
ENSMUSG00000022372	Sla	TRUE	-0.771197	0.221738	-3.47796	0.000505238	0.0155421	139.193	126.065	157.757	81.2931	78.086	88.2009
ENSMUSG00000059256	Gzmd	TRUE	-1.32967	0.383134	-3.47052	0.000519452	0.01591	72.1742	153.508	145.699	34.3492	52.0573	61.1392
ENSMUSG00000025507	Lrdd	TRUE	-0.48532	0.139842	-3.47049	0.000519506	0.01591	468.101	465.67	470.255	326.317	300.776	375.856
ENSMUSG00000010830	Kdelr3	TRUE	0.291481	0.0840052	3.4698	0.000520842	0.01591	3281.86	3515.25	3256.62	4149.38	3880.2	4277.74
ENSMUSG00000037989	Wnk2	TRUE	-3.43389	0.98975	-3.46945	0.000521516	0.01591	22.6833	10.2911	24.1156	3.43492	0	2.00457
ENSMUSG00000022895	Ets2	TRUE	-0.587885	0.169477	-3.46883	0.00052274	0.0159144	1267.17	1391.86	1151.52	907.963	658.429	970.21
ENSMUSG00000030921	Trim30a	TRUE	-0.561001	0.162194	-3.45883	0.000542519	0.0164795	338.188	340.462	385.85	211.82	238.114	270.616
ENSMUSG00000032076	Cadm1	TRUE	-0.846805	0.24486	-3.45833	0.000543539	0.0164795	785.668	1092.57	994.77	348.072	563.954	684.559
ENSMUSG00000030263	Lrmp	TRUE	-0.652476	0.188759	-3.45666	0.000546913	0.0165478	344.374	306.159	243.166	188.92	181.237	198.452
ENSMUSG00000020773	Trim47	TRUE	0.66577	0.192651	3.45584	0.000548581	0.0165642	856.811	670.634	749.595	928.573	1180.93	1500.42
ENSMUSG00000025584	Pde8a	TRUE	-0.546141	0.158111	-3.45417	0.000551991	0.0166331	2754.99	2884.92	2868.76	2199.49	1488.45	2140.88
ENSMUSG00000027016	Zfp385b	TRUE	2.61644	0.757713	3.45307	0.000554245	0.0166669	5.1553	4.28794	4.01927	50.3788	15.4244	17.0388
ENSMUSG00000024962	Vegfb	TRUE	0.562788	0.163067	3.45127	0.000557949	0.0167442	258.796	246.128	207.997	328.607	337.409	386.881
ENSMUSG00000065979	Cpped1	TRUE	-0.325914	0.0945827	-3.44581	0.000569359	0.0170518	1974.48	1936.43	2129.21	1506.78	1688.01	1621.69
ENSMUSG00000029814	Igf2bp3	TRUE	2.76517	0.802995	3.44356	0.000574099	0.0171589	95.8886	51.4553	20.0964	451.119	550.458	136.31
ENSMUSG00000029804	Herc3	TRUE	-0.702397	0.204233	-3.4392	0.000583442	0.0174029	1185.72	1229.78	1461.01	997.271	572.631	813.853
ENSMUSG00000038828	Tmem214	TRUE	0.317186	0.0922714	3.43754	0.000587035	0.0174747	2118.83	1953.58	1825.76	2451.39	2411.99	2484.66
ENSMUSG00000026384	Ptpn4	TRUE	-0.671968	0.195749	-3.43281	0.000597369	0.0177464	550.586	385.914	463.221	326.317	309.452	242.552
ENSMUSG00000040990	Sh3kbp1	TRUE	-0.395614	0.115417	-3.4277	0.000608721	0.0180473	5287.28	6397.6	5867.14	4674.92	3984.31	4685.67
ENSMUSG00000019256	Ahr	TRUE	-1.01282	0.297096	-3.40906	0.00065188	0.0192766	738.239	627.754	1464.02	522.108	394.286	486.107
ENSMUSG00000089672	Gp49a	TRUE	-0.938967	0.275464	-3.40867	0.000652803	0.0192766	1280.58	1092.57	669.209	717.898	426.099	444.011
ENSMUSG00000033207	Mamdc2	TRUE	1.42857	0.419224	3.40764	0.000655264	0.0193106	157.752	100.338	85.4096	128.237	398.142	396.904
ENSMUSG00000047641	Krt83	TRUE	-2.42146	0.711116	-3.40515	0.000661277	0.0194381	14.4348	33.4459	39.1879	2.28995	5.78415	8.01826
ENSMUSG00000074207	Adh1	TRUE	1.62107	0.476119	3.40476	0.000662227	0.0194381	43.3045	53.1704	15.0723	72.1333	124.359	147.336
ENSMUSG00000020256	Aldh1l2	TRUE	0.661587	0.195095	3.3911	0.000696126	0.0203925	2958.11	2758.86	3468.63	6414.14	4180.98	3935.96
ENSMUSG00000031298	Gpr64	TRUE	0.732743	0.216263	3.38819	0.000703545	0.0205503	867.122	547.998	559.684	1007.58	1318.79	953.171
ENSMUSG00000031642	Sh3rf1	TRUE	-0.539816	0.159337	-3.3879	0.000704303	0.0205503	1478.54	2207.43	1977.48	1238.86	1299.51	1358.09
ENSMUSG00000041741	Pde3a	TRUE	0.720136	0.212778	3.38445	0.000713206	0.020769	502.126	513.695	364.749	577.066	914.86	781.78
ENSMUSG00000040722	Scamp5	TRUE	-0.386077	0.114103	-3.38357	0.00071549	0.0207944	582.549	632.9	658.156	480.889	479.12	474.08
ENSMUSG00000041203	2310036O22Rik	TRUE	0.727143	0.215254	3.37806	0.000729986	0.0211739	830.003	531.704	508.438	1029.33	1185.75	879.002
ENSMUSG00000036743	Psma8	TRUE	-1.40563	0.416448	-3.37528	0.000737396	0.0213224	209.305	225.546	166.8	133.962	53.0214	41.0936
ENSMUSG00000036553	Sh3tc1	TRUE	-0.76376	0.226317	-3.37473	0.000738868	0.0213224	180.436	151.793	132.636	85.8729	99.2946	88.2009
ENSMUSG00000027435	Cd93	TRUE	-0.548121	0.162429	-3.37452	0.000739447	0.0213224	3209.69	2984.4	2974.26	1933.86	2617.33	1717.91
ENSMUSG00000028369	Svep1	TRUE	0.92365	0.274121	3.3695	0.000753057	0.0216724	4277.87	2567.62	2871.77	3734.9	8088.17	6607.05
ENSMUSG00000021806	Nid2	TRUE	0.375288	0.11142	3.36822	0.000756548	0.0217305	5026.42	5233.86	4573.93	5976.76	6066.61	7198.39
ENSMUSG00000032020	Ubash3b	TRUE	-0.466571	0.138631	-3.36555	0.000763905	0.0218991	604.201	615.748	589.828	454.554	375.006	481.096
ENSMUSG00000049866	Arl4c	TRUE	-0.772973	0.229818	-3.36341	0.000769847	0.0220266	2913.78	3781.1	3354.08	2777.7	1512.55	1592.63
ENSMUSG00000014602	Kif1a	TRUE	-0.48566	0.144502	-3.36091	0.000776856	0.0221841	997.035	1228.92	905.342	713.318	775.076	748.705
ENSMUSG00000030144	Clec4d	TRUE	-0.603614	0.179854	-3.35614	0.000790391	0.0225269	984.662	906.47	713.421	542.717	677.709	493.123
ENSMUSG00000033152	Podxl2	TRUE	-0.850502	0.253884	-3.34997	0.000808207	0.0229672	647.506	726.377	1005.82	591.951	320.056	408.931
ENSMUSG00000039637	Coro7	TRUE	-0.417951	0.124772	-3.34971	0.000808958	0.0229672	690.81	718.658	630.021	528.977	464.66	534.217
ENSMUSG00000096727	Psmb9	TRUE	-0.918728	0.274326	-3.34904	0.000810922	0.0229787	146.411	159.511	176.848	59.5386	83.8702	111.253
ENSMUSG00000057672	Pkn1	TRUE	-0.349074	0.104486	-3.34087	0.000835152	0.0236199	1038.28	1205.77	1137.45	909.108	871.478	875.995
ENSMUSG00000031378	Abcd1	TRUE	-0.373548	0.111841	-3.34	0.000837799	0.0236494	789.792	786.408	823.951	580.501	599.623	671.529
ENSMUSG00000006205	Htra1	TRUE	-0.738358	0.221234	-3.33745	0.000845504	0.0238212	1884.78	2743.42	3387.24	1735.78	1272.51	1797.09
ENSMUSG00000026837	Col5a1	TRUE	0.323121	0.0969756	3.33198	0.000862298	0.024248	99622.1	103712	120301	132145	137374	135359
ENSMUSG00000039109	F13a1	TRUE	-0.926625	0.278482	-3.32741	0.000876574	0.0246025	9508.44	11640.9	6590.6	6393.53	5290.57	2910.63
ENSMUSG00000038463	Olfml2b	TRUE	-0.467525	0.140556	-3.32625	0.000880216	0.0246211	3297.33	4120.71	3796.2	2870.45	2278.95	2962.75
ENSMUSG00000037624	Kcnk2	TRUE	-0.856322	0.257452	-3.32614	0.000880579	0.0246211	520.685	583.16	763.662	480.889	287.279	264.603
ENSMUSG00000030793	Pycard	TRUE	-0.985339	0.296461	-3.32367	0.000888407	0.024793	85.578	76.3253	94.4529	49.2338	46.2732	34.0776
ENSMUSG00000041559	Fmod	TRUE	0.804664	0.242213	3.32213	0.000893334	0.0248833	30251.3	21420.8	15492.3	46722.9	41191.8	29404
ENSMUSG00000097993	Ptprv	FALSE	-1.14913	0.346112	-3.32011	0.000899807	0.0250163	373.244	572.011	446.139	238.154	101.223	288.657
ENSMUSG00000019880	Rspo3	TRUE	1.42268	0.428639	3.31905	0.000903237	0.0250644	111.354	128.638	86.4144	248.459	497.437	129.294
ENSMUSG00000028803	Nipal3	TRUE	-0.643704	0.193979	-3.31841	0.000905305	0.0250746	226.833	203.248	265.272	143.122	163.884	137.313
ENSMUSG00000030987	Stim1	TRUE	-0.336847	0.101662	-3.3134	0.000921675	0.0254801	860.935	906.47	962.616	733.927	710.486	717.634
ENSMUSG00000047810	Ccdc88b	TRUE	-0.651113	0.196878	-3.30719	0.000942359	0.0259595	211.367	205.821	172.829	139.687	121.467	115.263
ENSMUSG00000008140	Emc10	TRUE	0.35927	0.108657	3.30645	0.000944861	0.0259595	1871.37	1619.13	1607.71	2153.69	2050.48	2334.32
ENSMUSG00000047686	Zcchc5	TRUE	1.14406	0.34605	3.30605	0.000946228	0.0259595	39.1803	52.3128	27.1301	93.8878	98.3305	71.1621
ENSMUSG00000018796	Acsl1	TRUE	-0.380238	0.115024	-3.30572	0.000947313	0.0259595	1399.15	1312.11	1279.13	1040.78	911.967	1113.54
ENSMUSG00000039062	Anpep	TRUE	-0.65133	0.19704	-3.30557	0.000947826	0.0259595	1243.46	1493.92	1723.26	1083.14	704.702	1053.4
ENSMUSG00000055044	Pdlim1	TRUE	0.519118	0.157084	3.30471	0.000950752	0.0259869	1066.12	1192.9	1039.99	1527.39	1307.22	1894.31
ENSMUSG00000039323	Igfbp2	TRUE	-2.24262	0.678712	-3.30424	0.000952353	0.0259869	91.7643	73.7525	21.1012	24.0444	6.74817	9.02054
ENSMUSG00000004207	Psap	TRUE	-0.285897	0.0867528	-3.29553	0.000982345	0.0267557	34311.6	36020.4	40139.5	30294.8	29904	30413.3
ENSMUSG00000090272	Mndal	TRUE	-0.655261	0.19904	-3.29211	0.000994401	0.0270341	211.367	283.861	230.103	136.252	160.028	164.374
ENSMUSG00000028373	Astn2	TRUE	1.62811	0.494954	3.28941	0.00100397	0.0272441	40.2113	10.2911	37.1783	108.772	66.5177	94.2146
ENSMUSG00000039942	Ptger4	TRUE	-0.644659	0.196183	-3.286	0.0010162	0.0274786	339.219	396.205	280.344	227.85	236.186	186.425
ENSMUSG00000047793	Sned1	TRUE	-0.736663	0.224185	-3.28596	0.00101635	0.0274786	11478.8	11273.8	9246.34	4764.23	5415.89	9022.55
ENSMUSG00000052085	Dock8	TRUE	-0.460826	0.140461	-3.28082	0.00103506	0.0279334	1675.47	1914.99	1501.2	1124.36	1175.15	1400.19
ENSMUSG00000024789	Jak2	TRUE	-0.44995	0.137178	-3.28005	0.00103788	0.0279581	3531.38	3905.45	4623.17	3312.41	2721.44	2796.37
ENSMUSG00000026786	Apbb1ip	TRUE	-0.457464	0.139512	-3.27904	0.0010416	0.0280071	1532.16	1677.44	1384.64	952.617	1244.56	1147.61
ENSMUSG00000029819	Npy	TRUE	-1.55969	0.475798	-3.27804	0.00104529	0.0280553	57.7394	54.028	41.1976	18.3196	8.67622	25.0571
ENSMUSG00000031709	Tbc1d9	TRUE	-0.597864	0.182739	-3.27169	0.00106907	0.0286414	272.2	244.412	239.147	191.21	144.604	164.374
ENSMUSG00000060126	Tpt1	TRUE	1.05676	0.323245	3.26923	0.0010784	0.0288388	173.218	92.6195	74.3566	212.965	271.855	221.504
ENSMUSG00000031661	Nkd1	TRUE	0.870128	0.266239	3.26822	0.00108228	0.0288902	178.373	108.914	105.506	280.518	233.294	203.463
ENSMUSG00000020077	Srgn	TRUE	-0.910383	0.278852	-3.26475	0.0010956	0.0291631	482.536	585.732	323.552	277.083	170.632	293.669
ENSMUSG00000035890	Rnf126	TRUE	0.53027	0.162434	3.26453	0.00109646	0.0291631	794.947	693.788	544.612	937.733	935.104	1063.42
ENSMUSG00000073490	AI607873	TRUE	-0.697341	0.213721	-3.26285	0.00110298	0.0292837	334.063	367.047	345.658	265.634	223.654	157.358
ENSMUSG00000034881	Tbxa2r	TRUE	1.65231	0.507226	3.25755	0.00112379	0.0297825	73.2053	13.7214	39.1879	127.092	159.064	108.247
ENSMUSG00000017754	Pltp	TRUE	-0.628578	0.193134	-3.25462	0.00113544	0.0300371	1614.64	1294.96	1953.37	985.821	886.903	1271.9
ENSMUSG00000040289	Hey1	TRUE	1.2408	0.381469	3.2527	0.00114316	0.0301871	111.354	108.056	60.2891	153.426	163.884	343.783
ENSMUSG00000033102	Cdc14b	TRUE	0.425126	0.13075	3.25144	0.00114823	0.0302668	837.221	916.761	870.173	1354.5	1116.34	1055.4
ENSMUSG00000021423	Ly86	TRUE	-0.846589	0.260424	-3.25081	0.00115078	0.0302799	209.305	206.679	299.436	98.4676	160.992	137.313
ENSMUSG00000023022	Lima1	TRUE	-0.316055	0.0972602	-3.24958	0.00115574	0.0303561	16376.3	15346.5	14295.6	13190.1	11381.3	12395.2
ENSMUSG00000048163	Selplg	TRUE	-0.607264	0.187049	-3.24656	0.0011681	0.0306261	363.964	355.041	312.499	218.69	187.985	270.616
ENSMUSG00000028108	Ecm1	TRUE	-0.805832	0.248328	-3.24503	0.00117438	0.0307362	12668.6	23090.5	21395.6	9509	14487.4	8697.81
ENSMUSG00000036894	Rap2b	TRUE	-0.366931	0.113094	-3.24446	0.00117673	0.0307431	2300.3	1953.58	1927.24	1697.99	1589.68	1505.43
ENSMUSG00000031543	Ank1	TRUE	0.931314	0.287603	3.2382	0.00120288	0.0313663	96.9196	65.1767	95.4578	117.932	192.805	178.406
ENSMUSG00000043939	A530064D06Rik	TRUE	-0.90529	0.279637	-3.23737	0.00120636	0.0313663	135.069	120.062	95.4578	60.6835	75.1939	51.1164
ENSMUSG00000024013	Fgd2	TRUE	-1.03135	0.318592	-3.23723	0.00120697	0.0313663	142.286	105.483	140.675	89.3079	46.2732	55.1255
ENSMUSG00000032006	Pdgfd	TRUE	0.509281	0.157601	3.23145	0.00123164	0.031951	794.947	626.897	742.561	936.588	935.104	1206.75
ENSMUSG00000022623	Shank3	TRUE	0.848875	0.262742	3.23083	0.00123431	0.031964	62.8947	55.7432	48.2313	105.337	107.007	88.2009
ENSMUSG00000031075	Ano1	TRUE	1.04077	0.322325	3.22894	0.00124252	0.0321002	211.367	201.533	146.704	593.096	268.963	290.662
ENSMUSG00000030541	Idh2	TRUE	0.350378	0.108523	3.22861	0.00124392	0.0321002	1856.94	1573.67	1633.83	2186.9	2002.28	2266.16
ENSMUSG00000032289	Thsd4	TRUE	0.347161	0.107562	3.22753	0.00124866	0.0321141	3728.31	3691.91	3823.33	5249.7	4863.51	4190.54
ENSMUSG00000071847	Apcdd1	TRUE	-1.16235	0.360141	-3.22749	0.00124882	0.0321141	321.691	415.072	716.436	327.462	154.244	168.383
ENSMUSG00000036908	Unc93b1	TRUE	-0.41609	0.129097	-3.22308	0.00126822	0.0325562	1620.83	1642.28	1956.38	1201.08	1255.16	1454.31
ENSMUSG00000025959	Klf7	TRUE	-0.495188	0.153696	-3.22186	0.0012736	0.0325922	5565.66	5852.18	4103.68	3924.97	3296.96	3791.64
ENSMUSG00000039058	Ak5	TRUE	-0.78967	0.245105	-3.22176	0.00127405	0.0325922	258.796	430.509	381.831	166.021	244.862	208.475
ENSMUSG00000039145	Camk1d	TRUE	-0.354841	0.110285	-3.2175	0.00129315	0.0330235	1576.49	1653.43	1388.66	1136.96	1213.71	1260.87
ENSMUSG00000057948	Unc13d	TRUE	-1.02446	0.318516	-3.21635	0.00129832	0.0330982	77.3295	90.9043	100.482	52.6687	30.8488	49.1118
ENSMUSG00000020140	Lgr5	TRUE	-1.60754	0.499883	-3.21582	0.00130071	0.0331018	76.2984	79.7556	148.713	29.7693	54.9494	15.0342
ENSMUSG00000022237	Ankrd33b	TRUE	-1.25104	0.389094	-3.21527	0.00130322	0.0331085	222.709	176.663	90.4337	91.5978	66.5177	48.1096
ENSMUSG00000047514	Tspyl1	TRUE	0.286679	0.0892309	3.21278	0.00131456	0.0333001	7232.89	7148.85	6748.36	8396.08	9302.84	8075.39
ENSMUSG00000024935	Slc1a1	TRUE	-1.52805	0.475638	-3.21262	0.00131528	0.0333001	158.783	284.719	229.099	133.962	27.9567	72.1643
ENSMUSG00000023274	Cd4	TRUE	-4.36039	1.3575	-3.21207	0.00131783	0.0333075	5.1553	14.579	22.106	0	0.964025	1.00228
ENSMUSG00000004328	Hif3a	TRUE	4.95922	1.5452	3.20943	0.00132999	0.0335571	1.03106	0	0	10.3048	4.82012	17.0388
ENSMUSG00000072437	Nanos1	TRUE	-0.523628	0.163315	-3.20624	0.00134481	0.0338732	307.256	319.88	332.595	188.92	241.97	235.536
ENSMUSG00000039601	Rcan2	TRUE	-0.460405	0.143622	-3.20568	0.00134745	0.0338817	1727.03	1576.25	1363.54	1031.62	1059.46	1299.96
ENSMUSG00000026317	Cln8	TRUE	-0.302045	0.0942381	-3.20512	0.00135005	0.0338892	1180.56	1204.91	1248.99	994.981	1022.83	930.118
ENSMUSG00000013415	Igf2bp1	TRUE	4.19606	1.30949	3.20433	0.00135376	0.0339247	22.6833	17.1518	1.00482	35.4942	489.725	223.509
ENSMUSG00000029436	Mmp17	TRUE	-1.17365	0.366537	-3.20199	0.00136483	0.0341439	249.517	590.878	311.494	245.024	122.431	144.329
ENSMUSG00000043099	Hic1	TRUE	0.652698	0.204094	3.19803	0.00138369	0.0345572	339.219	291.58	292.402	356.086	534.07	559.274
ENSMUSG00000037966	Ninj1	TRUE	-0.49004	0.153292	-3.19677	0.00138974	0.0346495	512.437	572.869	445.135	346.927	397.178	345.788
ENSMUSG00000051212	Gpr183	TRUE	-0.956609	0.299998	-3.18872	0.00142904	0.035569	106.199	102.053	146.704	44.6539	72.3019	65.1484
ENSMUSG00000003812	Dnase2a	TRUE	-0.488372	0.153254	-3.18669	0.00143909	0.0357589	357.778	318.165	394.894	246.169	251.61	264.603
ENSMUSG00000053080	2700081O15Rik	TRUE	0.349172	0.109618	3.18535	0.00144579	0.0358649	1257.89	1389.29	1197.74	1639.6	1514.48	1745.98
ENSMUSG00000029765	Plxna4	TRUE	-0.773712	0.243077	-3.18299	0.00145764	0.0360933	238.175	294.153	183.882	147.701	115.683	156.356
ENSMUSG00000035530	Eif1	TRUE	0.251969	0.0791722	3.18254	0.0014599	0.0360933	2648.79	2763.15	2506.02	3140.66	3110.91	3179.24
ENSMUSG00000045160	Bola3	TRUE	0.537058	0.168801	3.18161	0.00146459	0.0361486	203.119	174.948	163.785	248.459	261.251	275.628
ENSMUSG00000034127	Tspan8	TRUE	-2.33221	0.733526	-3.17945	0.00147554	0.036358	69.081	37.7339	24.1156	2.28995	17.3524	6.0137
ENSMUSG00000053702	Nebl	TRUE	-1.7652	0.555822	-3.17584	0.00149402	0.0367519	96.9196	107.198	369.773	89.3079	32.7768	47.1073
ENSMUSG00000044528	Tram1l1	TRUE	0.609102	0.191869	3.17458	0.00150056	0.0368513	277.355	205.821	195.94	309.143	371.15	353.806
ENSMUSG00000024610	Cd74	TRUE	-1.53472	0.483578	-3.17367	0.00150522	0.0369042	43.3045	89.1891	102.491	41.219	16.3884	24.0548
ENSMUSG00000026566	Mpzl1	TRUE	0.351134	0.110701	3.17191	0.0015144	0.037062	2254.93	1847.24	1960.4	2442.23	2712.77	2574.86
ENSMUSG00000026202	Tuba4a	TRUE	-0.755688	0.238277	-3.17147	0.00151669	0.037062	170.125	273.57	235.128	117.932	135.927	148.338
ENSMUSG00000029334	Prkg2	TRUE	-0.709376	0.223773	-3.17008	0.00152399	0.0371788	340.25	510.265	428.053	266.779	204.373	311.71
ENSMUSG00000048897	Zfp710	TRUE	-0.386093	0.121914	-3.16693	0.0015406	0.0375218	1008.38	1239.21	1088.22	796.901	881.119	874.993
ENSMUSG00000022382	Wnt7b	TRUE	-3.34363	1.05631	-3.16539	0.00154877	0.0376344	9.27954	9.43346	64.3084	2.28995	4.82012	1.00228
ENSMUSG00000020312	Shc2	TRUE	0.447199	0.141291	3.16509	0.00155033	0.0376344	312.411	325.883	323.552	488.903	426.099	397.906
ENSMUSG00000033684	Qsox1	TRUE	-0.414057	0.131229	-3.15522	0.0016038	0.0388683	14301.8	17205.8	19802	13126	12191.1	13192
ENSMUSG00000049932	H2afx	TRUE	0.854549	0.27097	3.15367	0.00161233	0.0390109	457.791	324.168	266.277	422.495	734.587	736.678
ENSMUSG00000020340	Cyfip2	TRUE	-0.910781	0.288944	-3.1521	0.00162104	0.0391573	291.79	202.391	251.205	112.207	97.3665	186.425
ENSMUSG00000026994	Galnt3	TRUE	-1.14304	0.362707	-3.15142	0.00162481	0.0391842	245.392	223.83	598.872	168.311	165.812	149.34
ENSMUSG00000028967	Errfi1	TRUE	-0.749103	0.238242	-3.1443	0.00166485	0.0400844	11134.4	11291	5933.45	6522.91	5779.33	4571.41
ENSMUSG00000051279	Gdf6	TRUE	-1.5754	0.50164	-3.14051	0.00168656	0.0404749	167.032	41.1642	118.569	45.7989	32.7768	31.0708
ENSMUSG00000004837	Grap	TRUE	-1.36782	0.435541	-3.1405	0.00168657	0.0404749	41.2424	31.7307	39.1879	14.8846	13.4963	15.0342
ENSMUSG00000002059	Rab34	TRUE	0.399577	0.127315	3.13849	0.00169822	0.0406883	1673.41	1307.82	1364.54	2014.01	1795.01	1922.38
ENSMUSG00000047260	Emc6	TRUE	0.406037	0.12948	3.13591	0.00171321	0.0409606	499.033	435.655	448.149	593.096	665.177	572.303
ENSMUSG00000028270	Gbp2	TRUE	-0.604281	0.192718	-3.13558	0.00171515	0.0409606	592.86	927.91	825.961	495.773	581.307	467.064
ENSMUSG00000044350	Lacc1	TRUE	-0.3312	0.105704	-3.13327	0.00172868	0.041217	1036.22	952.78	1026.92	740.797	821.349	832.897
ENSMUSG00000000489	Pdgfb	TRUE	-0.776339	0.247862	-3.13214	0.00173534	0.041309	230.957	257.276	245.176	159.151	96.4025	173.395
ENSMUSG00000074361	C5ar2	TRUE	-0.953661	0.305132	-3.12541	0.00177559	0.0421989	64.9568	72.8949	77.371	33.2042	34.7049	43.0982
ENSMUSG00000042804	Gpr153	TRUE	0.445218	0.142845	3.11679	0.0018283	0.0433401	2010.57	1825.8	1477.08	2588.78	2170.02	2476.64
ENSMUSG00000037411	Serpine1	TRUE	0.760749	0.244096	3.1166	0.00182949	0.0433401	31009.1	32789	21342.3	37124.6	68000.4	39134.1
ENSMUSG00000026589	Sec16b	TRUE	0.616572	0.197956	3.11469	0.00184139	0.0435521	374.275	270.998	389.87	613.705	525.394	447.018
ENSMUSG00000022246	Rai14	TRUE	-0.457484	0.146923	-3.11377	0.00184715	0.0436182	10573.5	11520	12739.1	6806.86	9092.68	9465.56
ENSMUSG00000027996	Sfrp2	TRUE	-1.08811	0.350267	-3.1065	0.00189314	0.0445768	868.153	1599.4	643.084	395.016	353.797	714.628
ENSMUSG00000048078	Tenm4	TRUE	-1.08551	0.349444	-3.1064	0.00189379	0.0445768	456.76	517.983	879.216	381.276	339.337	153.349
ENSMUSG00000039981	Zc3h12d	TRUE	-0.902851	0.290885	-3.1038	0.0019105	0.0448982	102.075	120.92	135.651	80.1481	46.2732	66.1507
ENSMUSG00000048701	Ccdc6	TRUE	0.370325	0.119408	3.10133	0.00192653	0.045203	4540.79	4221.9	3815.3	5734.02	5776.44	4748.82
ENSMUSG00000021747	4930452B06Rik	TRUE	1.00815	0.325173	3.10036	0.00193285	0.0452791	124.758	100.338	50.2409	188.92	170.632	194.443
ENSMUSG00000067878	Mtap7d3	TRUE	0.516611	0.166789	3.09739	0.00195236	0.0456636	182.498	174.09	210.007	250.749	270.891	287.655
ENSMUSG00000029560	Snx8	TRUE	-0.291518	0.0942565	-3.09282	0.00198266	0.0462753	1076.43	1044.54	1060.08	895.369	882.083	821.872
ENSMUSG00000029348	Asphd2	TRUE	-1.18384	0.382869	-3.09203	0.00198792	0.0462753	73.2053	96.0498	121.583	59.5386	26.0287	43.0982
ENSMUSG00000074151	Nlrc5	TRUE	-0.961991	0.31112	-3.09203	0.00198794	0.0462753	916.612	818.139	1327.37	280.518	599.623	690.573
ENSMUSG00000031595	Pdgfrl	TRUE	0.538741	0.174281	3.09123	0.0019933	0.046327	560.897	450.233	535.568	803.771	598.659	843.922
ENSMUSG00000032997	Chpf	TRUE	0.32243	0.104403	3.08831	0.00201296	0.0467102	3018.94	3580.43	3385.23	4477.99	4026.73	3984.07
ENSMUSG00000032698	Lmo2	TRUE	-0.563439	0.182761	-3.08293	0.00204973	0.0474887	501.095	475.961	376.807	278.228	357.653	279.637
ENSMUSG00000043832	Clec4a3	TRUE	-0.835681	0.271152	-3.08197	0.00205639	0.0475681	120.634	107.198	123.593	67.5534	80.0141	49.1118
ENSMUSG00000023336	Wfdc1	TRUE	3.04712	0.990736	3.07562	0.00210069	0.0484965	1.03106	0.857588	3.01446	10.3048	11.5683	18.0411
ENSMUSG00000019817	Plagl1	TRUE	0.298533	0.0970753	3.07527	0.0021031	0.0484965	1776.52	1727.18	1602.69	2085	1964.68	2231.08
ENSMUSG00000068794	Col28a1	TRUE	2.23161	0.725922	3.07417	0.00211089	0.0485999	17.528	7.71829	5.02409	13.7397	71.3378	56.1278
ENSMUSG00000069806	Cacng7	TRUE	0.445721	0.145161	3.07053	0.00213683	0.0491204	780.512	787.265	607.915	1082	962.097	921.098
ENSMUSG00000041362	4930506M07Rik	TRUE	-0.606741	0.19764	-3.06992	0.00214114	0.0491429	428.921	316.45	323.552	234.719	266.071	200.457
ENSMUSG00000017607	Tns4	TRUE	2.1043	0.685932	3.0678	0.00215643	0.0494027	16.497	19.7245	17.0819	13.7397	133.035	82.1872
ENSMUSG00000019960	Dusp6	TRUE	-0.670508	0.21859	-3.06742	0.00215917	0.0494027	1024.87	1468.19	1030.94	542.717	884.011	786.792
ENSMUSG00000002997	Prkar2b	TRUE	0.317759	0.103648	3.06576	0.00217115	0.0495999	4423.25	3839.42	3632.42	4779.12	5128.61	4916.2
ENSMUSG00000090709	Gm17173	FALSE	1.69775	0.554206	3.06339	0.00218842	0.0499098	14.4348	6.8607	13.0626	49.2338	39.525	22.0502
ENSMUSG00000027840	Wnt2b	TRUE	-1.99857	0.652492	-3.06297	0.00219149	0.0499098	25.7765	30.0156	90.4337	8.01481	18.3165	10.0228
ENSMUSG00000038260	Trpm4	TRUE	0.468	0.152859	3.06164	0.0022013	0.0500157	572.238	614.033	573.751	730.493	730.731	973.216
ENSMUSG00000022305	Lrp12	TRUE	-0.400547	0.130837	-3.06142	0.00220293	0.0500157	1162	1124.3	1070.13	920.558	903.291	719.639
ENSMUSG00000079481	Nhsl2	TRUE	-0.608651	0.198898	-3.06011	0.00221257	0.0501573	281.479	283.004	209.002	187.776	160.992	159.363
ENSMUSG00000062585	Cnr2	TRUE	-0.716846	0.234333	-3.05909	0.00222008	0.0502502	114.448	102.911	109.525	61.8285	66.5177	70.1598
ENSMUSG00000028163	Nfkb1	TRUE	-0.243972	0.0798044	-3.05712	0.00223476	0.050505	1939.42	1917.57	1883.03	1560.6	1620.53	1664.79
ENSMUSG00000027333	Smox	TRUE	-0.450378	0.147519	-3.05301	0.00226556	0.0511226	562.959	631.184	689.306	401.885	472.372	503.146
ENSMUSG00000022105	Rb1	TRUE	-0.356262	0.116738	-3.05181	0.0022747	0.0512502	1385.74	1461.33	1724.27	1174.74	1176.11	1219.78
ENSMUSG00000037731	Themis2	TRUE	-0.567352	0.186124	-3.04824	0.00230186	0.0517433	302.101	248.7	297.426	161.441	214.978	194.443
ENSMUSG00000044071	Fam19a2	TRUE	1.23106	0.404003	3.04716	0.00231016	0.0517433	105.168	192.1	89.4289	430.51	324.876	154.352
ENSMUSG00000028654	Mycl1	TRUE	1.2092	0.396858	3.04693	0.00231191	0.0517433	46.3977	33.4459	46.2217	137.397	55.9134	98.2237
ENSMUSG00000031145	Prickle3	TRUE	0.629382	0.206583	3.04664	0.00231418	0.0517433	140.224	108.056	137.66	206.095	174.488	215.491
ENSMUSG00000008658	Rbfox1	TRUE	1.67293	0.549139	3.04646	0.00231557	0.0517433	59.8015	96.0498	26.1253	218.69	71.3378	291.664
ENSMUSG00000032261	Sh3bgrl2	TRUE	-0.716904	0.235348	-3.04615	0.00231795	0.0517433	487.691	460.525	478.294	279.373	387.538	200.457
ENSMUSG00000073164	2410018L13Rik	FALSE	0.940681	0.308863	3.04563	0.00232195	0.0517433	37.1182	30.0156	37.1783	70.9883	61.6976	67.1529
ENSMUSG00000045176	2310047M10Rik	TRUE	0.56824	0.186597	3.04528	0.00232467	0.0517433	261.889	205.821	257.234	326.317	325.84	420.959
ENSMUSG00000074971	Fibin	TRUE	0.98508	0.323702	3.04317	0.00234099	0.0520279	75.2674	79.7556	99.477	132.817	244.862	125.285
ENSMUSG00000020687	Cdc27	TRUE	0.210795	0.0692991	3.04182	0.00235154	0.0521836	3504.57	3570.14	3401.31	4041.75	3984.31	4099.34
ENSMUSG00000052087	Rgs14	TRUE	-0.900178	0.296027	-3.04087	0.00235899	0.0522703	82.4848	106.341	80.3855	46.9439	40.489	57.1301
ENSMUSG00000008845	Cd163	TRUE	-2.27	0.747096	-3.03843	0.00237813	0.0526152	81.4537	95.1922	10.0482	10.3048	18.3165	10.0228
ENSMUSG00000042734	Ttc9	TRUE	1.9708	0.649452	3.03456	0.00240883	0.0532146	41.2424	23.1549	21.1012	21.7545	132.071	180.411
ENSMUSG00000054612	Mgmt	TRUE	-0.310332	0.102286	-3.03397	0.00241356	0.0532392	728.959	740.956	775.72	588.516	601.551	620.413
ENSMUSG00000041992	Rapgef5	TRUE	-0.593866	0.195846	-3.03231	0.00242687	0.0534529	181.467	215.254	171.824	133.962	125.323	118.269
ENSMUSG00000040433	Zbtb38	TRUE	-0.471398	0.155482	-3.03185	0.00243064	0.0534559	2710.66	3588.15	3853.48	2184.61	2684.81	2452.59
ENSMUSG00000038235	F11r	TRUE	1.08473	0.357923	3.03062	0.00244056	0.053557	82.4848	181.809	151.728	240.444	213.049	429.979
ENSMUSG00000019295	Tmem129	TRUE	0.39167	0.12926	3.0301	0.00244476	0.053557	482.536	571.153	525.52	628.59	725.911	717.634
ENSMUSG00000028565	Nfia	TRUE	-0.386574	0.127603	-3.0295	0.00244958	0.053557	1763.11	1864.4	1982.51	1214.82	1526.05	1548.53
ENSMUSG00000047881	Rell1	TRUE	-0.445529	0.147065	-3.02948	0.00244977	0.053557	1376.47	1418.45	1646.9	1215.96	1141.41	905.061
ENSMUSG00000051910	Sox6	TRUE	1.59318	0.525995	3.02889	0.00245451	0.053581	24.7454	29.158	23.1108	125.947	77.122	30.0685
ENSMUSG00000063286	Gm8995	FALSE	-0.927839	0.306739	-3.02484	0.00248761	0.0542233	76.2984	98.6226	69.3325	38.9291	40.489	49.1118
ENSMUSG00000046186	Cd109	TRUE	0.365094	0.120858	3.02086	0.00252062	0.0548616	4309.83	3670.47	3466.62	4727.59	4609.97	5404.31
ENSMUSG00000028463	Car9	TRUE	-1.64101	0.543324	-3.02031	0.00252517	0.0548796	229.926	440.8	88.424	135.107	57.8415	51.1164
ENSMUSG00000024642	Tle4	TRUE	-0.524054	0.1737	-3.01701	0.00255284	0.0553993	555.741	488.825	609.925	461.424	341.265	348.794
ENSMUSG00000027661	Slc2a10	TRUE	0.303535	0.100649	3.01578	0.00256319	0.0555421	706.276	712.655	762.657	927.428	903.291	861.963
ENSMUSG00000032431	Crtap	TRUE	0.226267	0.0750511	3.01484	0.00257118	0.0556334	3143.7	3170.5	3268.67	3573.46	3805.01	3829.72
ENSMUSG00000037499	Nenf	TRUE	0.320146	0.106235	3.01356	0.00258203	0.0557572	560.897	527.416	527.53	692.708	669.033	655.493
ENSMUSG00000019987	Arg1	TRUE	-1.47489	0.489574	-3.0126	0.00259019	0.0557572	1943.55	2858.34	1056.06	933.153	426.099	748.705
ENSMUSG00000040618	Pck2	TRUE	0.414022	0.137447	3.01222	0.00259342	0.0557572	2348.75	2336.07	2975.27	3808.18	3158.15	3240.38
ENSMUSG00000044006	Cilp2	TRUE	2.10318	0.698282	3.01194	0.00259588	0.0557572	7.21742	4.28794	5.02409	11.4497	32.7768	26.0593
ENSMUSG00000028861	Mrps15	TRUE	0.45119	0.149811	3.01173	0.0025976	0.0557572	526.872	397.921	425.038	581.646	615.048	646.472
ENSMUSG00000073530	Pappa2	TRUE	1.09479	0.363567	3.01126	0.00260169	0.0557572	126.82	92.6195	149.718	131.672	312.344	342.781
ENSMUSG00000049076	Acap2	TRUE	-0.218673	0.0726233	-3.01106	0.00260339	0.0557572	3701.51	3714.21	3929.85	3199.05	3290.22	3259.42
ENSMUSG00000071856	Mcc	TRUE	-0.48564	0.161621	-3.0048	0.00265752	0.0568339	983.631	885.03	1022.91	621.72	602.515	839.913
ENSMUSG00000060802	B2m	TRUE	-0.425514	0.141771	-3.00141	0.00268734	0.057376	15974.2	15076.4	20438	11529.9	12821.5	13983.8
ENSMUSG00000029223	Uchl1	TRUE	-0.670647	0.223488	-3.00081	0.00269259	0.057376	226.833	234.121	190.916	159.151	105.079	146.333
ENSMUSG00000027777	Schip1	TRUE	0.538692	0.179529	3.00059	0.00269455	0.057376	400.051	354.184	289.388	567.906	514.789	433.988
ENSMUSG00000002393	Nr2f6	TRUE	0.383314	0.127992	2.99483	0.00274596	0.0583864	422.735	388.487	437.096	522.108	587.091	517.178
ENSMUSG00000026643	Nmt2	TRUE	0.337819	0.112888	2.99252	0.00276688	0.0587463	1193.97	1159.46	1020.9	1501.06	1453.75	1310.99
ENSMUSG00000020333	Acsl6	TRUE	-2.44339	0.817449	-2.98905	0.00279848	0.0593318	11.3417	20.5821	40.1927	3.43492	7.7122	2.00457
ENSMUSG00000019876	Pkib	TRUE	-0.948162	0.318069	-2.98099	0.00287315	0.0608274	102.075	88.3315	95.4578	66.4084	48.2012	34.0776
ENSMUSG00000063919	Srrm4	TRUE	-1.05987	0.355992	-2.97722	0.00290872	0.061492	117.541	133.784	77.371	67.5534	34.7049	56.1278
ENSMUSG00000079227	Ccr5	TRUE	-0.50119	0.168696	-2.97097	0.00296858	0.0626678	585.642	714.37	652.127	451.119	384.646	544.239
ENSMUSG00000015981	Stk32c	TRUE	-1.4695	0.494871	-2.96946	0.00298327	0.0628877	24.7454	40.3066	34.1638	10.3048	14.4604	11.0251
ENSMUSG00000018476	Kdm6b	TRUE	0.362889	0.122228	2.96896	0.00298807	0.0628989	1744.55	1819.8	1918.2	2387.27	2035.06	2628.99
ENSMUSG00000030598	Fbxo17	TRUE	0.45838	0.154415	2.96848	0.00299273	0.0629071	477.381	447.661	357.715	626.3	594.803	542.235
ENSMUSG00000013707	Tnfaip8l2	TRUE	-0.711934	0.24027	-2.96306	0.00304599	0.0639355	145.379	154.366	155.747	83.583	77.122	117.267
ENSMUSG00000020674	Pxdn	TRUE	0.336322	0.113536	2.96224	0.00305412	0.0640148	4322.2	4907.97	4369.96	5339.01	5386.97	6445.68
ENSMUSG00000005413	Hmox1	TRUE	-0.417502	0.141185	-2.95713	0.00310514	0.0649918	8471.19	8614.47	7665.76	5459.23	7463.48	5607.77
ENSMUSG00000052837	Junb	TRUE	0.524306	0.177427	2.95506	0.0031261	0.0653378	1840.44	1996.46	2186.49	2213.23	3576.53	2871.54
ENSMUSG00000004892	Bcan	TRUE	0.91311	0.309158	2.95353	0.00314159	0.06551	52.5841	52.3128	34.1638	73.2782	97.3665	91.2077
ENSMUSG00000024640	Psat1	TRUE	0.508999	0.172345	2.95337	0.00314324	0.06551	2918.93	2782.87	3096.85	5190.16	4133.74	3198.28
ENSMUSG00000026737	Pip4k2a	TRUE	-0.325742	0.110387	-2.95092	0.00316826	0.0659382	1014.56	1153.46	1197.74	857.584	919.68	908.068
ENSMUSG00000025154	Arhgap19	TRUE	-0.49511	0.167856	-2.94962	0.0031817	0.0661216	596.984	545.426	585.809	439.669	462.732	323.737
ENSMUSG00000059479	B3gnt8	TRUE	-0.947995	0.321442	-2.94919	0.00318604	0.0661216	84.5469	68.607	118.569	50.3788	47.2372	43.0982
ENSMUSG00000070780	Rbm47	TRUE	-0.915223	0.310549	-2.94712	0.0032075	0.0664733	392.834	454.521	189.911	204.95	180.273	165.377
ENSMUSG00000041479	Syt15	TRUE	-2.80312	0.951518	-2.94594	0.00321975	0.0666334	30.9318	16.2942	59.2843	1.14497	0.964025	13.0297
ENSMUSG00000029299	Abcg3	TRUE	-0.87749	0.297918	-2.94541	0.00322531	0.0666548	82.4848	108.056	132.636	61.8285	48.2012	66.1507
ENSMUSG00000025877	Hk3	TRUE	-0.607333	0.206408	-2.94238	0.00325695	0.0672146	1180.56	1108.86	720.455	603.401	761.58	610.39
ENSMUSG00000006344	Ggt5	TRUE	-1.02793	0.349713	-2.93936	0.00328896	0.0677176	721.742	846.439	1511.25	277.083	518.645	713.625
ENSMUSG00000031554	Adam5	TRUE	-1.0069	0.342575	-2.93921	0.00329052	0.0677176	129.914	210.967	197.949	56.1037	127.251	84.1917
ENSMUSG00000056596	Trnp1	TRUE	0.510295	0.173842	2.9354	0.00333116	0.0684584	137.131	138.072	154.742	196.935	201.481	213.486
ENSMUSG00000097391	Mirg	FALSE	2.03391	0.693253	2.93386	0.00334774	0.0686035	12.3727	69.4646	9.04337	66.4084	172.56	135.308
ENSMUSG00000000594	Gm2a	TRUE	-0.313549	0.106885	-2.93353	0.00335136	0.0686035	1648.67	1517.93	1449.95	1236.57	1150.08	1328.02
ENSMUSG00000015243	Abca1	TRUE	-0.487884	0.166323	-2.93336	0.00335318	0.0686035	1470.29	1348.99	2035.76	1156.42	1148.15	1156.63
ENSMUSG00000070044	Fam149a	TRUE	0.30536	0.104111	2.93302	0.00335685	0.0686035	1168.19	1288.1	1175.64	1529.68	1581	1379.14
ENSMUSG00000021108	Prkch	TRUE	-0.503381	0.171757	-2.93077	0.00338124	0.0690063	316.535	285.577	258.238	201.515	222.69	182.415
ENSMUSG00000000958	Slc7a7	TRUE	-0.798456	0.272638	-2.92863	0.00340454	0.0693858	438.201	422.791	837.014	348.072	338.373	289.66
ENSMUSG00000037926	Ssh2	TRUE	-0.284371	0.097161	-2.9268	0.00342466	0.0696995	2238.43	2197.14	1967.43	1679.67	1736.21	1841.19
ENSMUSG00000028906	Epb4.1	TRUE	-0.314734	0.10756	-2.92611	0.00343229	0.0697583	1193.97	1192.05	1274.11	1077.42	944.744	922.1
ENSMUSG00000009090	Ap1b1	TRUE	-0.266747	0.0912211	-2.92418	0.00345367	0.0700963	2152.85	2247.74	2398.5	1830.81	1834.54	1985.52
ENSMUSG00000040390	Map3k10	TRUE	0.460972	0.157725	2.92263	0.00347085	0.0702528	442.325	493.97	388.865	698.433	562.99	565.287
ENSMUSG00000071203	Naip5	TRUE	-0.780563	0.26709	-2.92247	0.00347263	0.0702528	81.4537	90.9043	81.3903	52.6687	45.3092	50.1141
ENSMUSG00000028434	Epb4.1l4b	TRUE	1.16803	0.399711	2.9222	0.00347569	0.0702528	40.2113	29.158	21.1012	53.8137	58.8055	90.2054
ENSMUSG00000033487	Fndc3a	TRUE	0.478969	0.164086	2.91901	0.00351143	0.0708781	3480.86	3191.08	2912.97	3449.8	5243.33	4663.62
ENSMUSG00000022303	Dcstamp	TRUE	-4.78812	1.6427	-2.91479	0.00355932	0.0717463	21.6523	5.14553	4.01927	1.14497	0	0
ENSMUSG00000034613	Ppm1h	TRUE	-0.504989	0.17354	-2.90992	0.00361516	0.0727125	354.685	373.908	299.436	255.329	261.251	208.475
ENSMUSG00000029373	Pf4	TRUE	-0.583537	0.200545	-2.90976	0.00361712	0.0727125	1397.09	1876.4	1115.35	1044.22	1047.89	837.908
ENSMUSG00000075042	4930431P03Rik	FALSE	1.43705	0.494128	2.90826	0.00363448	0.0729535	14.4348	17.1518	21.1012	74.4232	33.7409	35.0799
ENSMUSG00000079293	Clec7a	TRUE	-1.03281	0.355179	-2.90787	0.00363901	0.0729535	85.578	142.36	77.371	46.9439	40.489	62.1415
ENSMUSG00000034394	Lif	TRUE	-0.492804	0.169862	-2.9012	0.00371738	0.0744114	610.388	815.566	694.33	423.64	518.645	564.285
ENSMUSG00000035041	Creb3l3	TRUE	1.46602	0.50538	2.90082	0.00372183	0.0744114	23.7144	21.4397	23.1108	50.3788	32.7768	105.24
ENSMUSG00000029651	Mtus2	TRUE	1.56104	0.539008	2.89613	0.00377795	0.0754059	96.9196	86.6163	14.0675	168.311	171.596	243.555
ENSMUSG00000056854	Pou3f4	TRUE	1.68088	0.580451	2.89581	0.00378181	0.0754059	27.8386	12.0062	5.02409	46.9439	49.1653	47.1073
ENSMUSG00000019173	Rab5c	TRUE	-0.210018	0.072537	-2.89533	0.00378765	0.0754202	4817.11	5055.48	4685.47	4174.57	4262.92	4149.45
ENSMUSG00000058135	Gstm1	TRUE	-0.348328	0.120428	-2.89241	0.003823	0.0758811	783.606	752.104	840.028	559.892	650.717	653.488
ENSMUSG00000029371	Cxcl5	TRUE	-3.37524	1.16699	-2.89225	0.00382488	0.0758811	24.7454	18.0093	10.0482	0	0	5.01141
ENSMUSG00000050777	Tmem37	TRUE	-0.611264	0.211353	-2.89214	0.00382624	0.0758811	360.871	541.995	610.93	334.332	312.344	344.785
ENSMUSG00000048376	F2r	TRUE	1.31156	0.453975	2.88905	0.00386407	0.0765284	1567.21	1323.26	1015.87	1607.54	4462.47	3625.26
ENSMUSG00000037440	Vnn1	TRUE	-1.07662	0.372712	-2.88861	0.00386949	0.0765329	47.4288	90.0467	90.4337	36.6391	39.525	32.073
ENSMUSG00000028249	Sdcbp	TRUE	-0.240415	0.0835039	-2.87909	0.00398826	0.0787029	6368.86	6241.52	5997.76	5626.4	5111.26	5016.42
ENSMUSG00000009687	Fxyd5	TRUE	-0.301804	0.104831	-2.87896	0.00398989	0.0787029	3060.19	3355.74	2762.25	2547.56	2530.57	2369.4
ENSMUSG00000025232	Hexa	TRUE	-0.29385	0.10215	-2.87666	0.00401903	0.0791716	5233.66	5313.61	6260.02	4418.45	4721.79	4568.4
ENSMUSG00000030120	Mlf2	TRUE	0.211114	0.0734523	2.87417	0.00405093	0.0796935	3609.74	3511.82	3347.05	4064.65	4080.72	3973.05
ENSMUSG00000019564	Arid3a	TRUE	0.464296	0.161573	2.87359	0.00405832	0.0797325	200.026	255.561	234.123	328.607	323.912	300.685
ENSMUSG00000005732	Ranbp1	TRUE	0.378942	0.131971	2.87141	0.00408649	0.0801791	2224	1769.2	1689.1	2520.08	2558.52	2309.26
ENSMUSG00000024867	Pip5k1b	TRUE	1.729	0.602527	2.86959	0.00411009	0.0805349	14.4348	8.57588	10.0482	21.7545	26.0287	61.1392
ENSMUSG00000028382	Ptbp3	TRUE	-0.180121	0.0628339	-2.86663	0.00414872	0.0811837	5690.42	5732.12	5778.71	5014.98	5056.31	5110.64
ENSMUSG00000020598	Nrcam	TRUE	-2.1217	0.740628	-2.86474	0.00417356	0.0815074	190.746	146.647	726.484	62.9735	103.151	78.178
ENSMUSG00000021186	Fbln5	TRUE	-0.575003	0.200732	-2.86453	0.00417632	0.0815074	3700.47	3896.88	5555.64	2820.07	2388.85	3620.24
ENSMUSG00000018930	Ccl4	TRUE	-1.23798	0.432788	-2.86047	0.00423014	0.0824485	86.609	110.629	41.1976	36.6391	36.6329	28.0639
ENSMUSG00000042724	Map3k9	TRUE	-0.763952	0.267143	-2.85971	0.00424026	0.0825366	83.5159	87.4739	94.4529	45.7989	51.0933	59.1347
ENSMUSG00000033379	Atp6v0b	TRUE	-0.253392	0.0886971	-2.85682	0.00427903	0.0831814	1866.22	1698.88	1872.98	1486.17	1546.3	1527.48
ENSMUSG00000020019	Ntn4	TRUE	-1.00778	0.35305	-2.85449	0.00431055	0.0836836	109.292	183.524	97.4674	45.7989	80.9781	67.1529
ENSMUSG00000041891	Lman1	TRUE	0.260541	0.0914165	2.85004	0.00437131	0.0847517	6627.65	5878.76	6867.93	7939.24	7781.61	7486.05
ENSMUSG00000037434	Slc30a1	TRUE	-0.604532	0.212209	-2.84876	0.004389	0.0848275	832.065	830.145	566.718	603.401	455.984	407.929
ENSMUSG00000028641	Lepre1	TRUE	0.271412	0.0952816	2.84852	0.00439232	0.0848275	2978.73	2938.1	3311.88	3605.52	3565.93	3966.03
ENSMUSG00000038650	Rnh1	TRUE	-0.308744	0.108388	-2.84851	0.00439249	0.0848275	2537.44	2606.21	2798.42	2312.84	1905.88	2195
ENSMUSG00000022307	Oxr1	TRUE	-0.273228	0.0959781	-2.84677	0.00441649	0.0851439	1994.07	2155.12	2025.71	1636.17	1840.32	1632.72
ENSMUSG00000060166	Zdhhc8	TRUE	0.278444	0.0978203	2.84649	0.00442043	0.0851439	1527	1478.48	1413.78	1936.15	1717.89	1707.89
ENSMUSG00000063130	Calml3	TRUE	-4.24815	1.49359	-2.84426	0.00445154	0.0855386	26.8076	5.14553	7.03373	0	0	2.00457
ENSMUSG00000095407	Tmem200c	TRUE	-2.57906	0.906783	-2.84418	0.00445253	0.0855386	23.7144	8.57588	44.212	8.01481	0.964025	4.00913
ENSMUSG00000039883	Lrrc17	TRUE	-1.26922	0.446471	-2.84278	0.00447224	0.0858053	222.709	174.09	652.127	141.977	116.647	176.402
ENSMUSG00000046572	Zfp518b	TRUE	0.294451	0.103637	2.84116	0.00449494	0.0861287	1132.1	1085.71	1080.18	1322.44	1468.21	1252.85
ENSMUSG00000052217	Hbb-bh1	TRUE	-2.69015	0.947636	-2.8388	0.0045284	0.0866404	12.3727	8.57588	19.0916	2.28995	2.89207	1.00228
ENSMUSG00000028525	Pde4b	TRUE	-1.23403	0.434754	-2.83844	0.0045334	0.0866404	291.79	345.608	140.675	184.341	75.1939	72.1643
ENSMUSG00000069601	Ank3	TRUE	-0.390379	0.137605	-2.83696	0.00455452	0.0868365	2085.83	2544.46	1877	1699.14	1725.6	1541.51
ENSMUSG00000030761	Myo7a	TRUE	-0.39119	0.137894	-2.8369	0.00455546	0.0868365	905.271	1099.43	917.399	832.395	705.666	692.577
ENSMUSG00000013921	Clip3	TRUE	0.248644	0.0876806	2.83579	0.00457121	0.0870242	1997.16	2232.3	2159.36	2627.71	2462.12	2503.7
ENSMUSG00000090035	Galnt4	TRUE	-0.36216	0.127745	-2.83503	0.00458218	0.0871206	1054.77	1189.47	1260.04	851.86	858.946	1015.31
ENSMUSG00000055538	Zcchc24	TRUE	-0.285521	0.100815	-2.83212	0.00462408	0.0877423	3759.25	3828.27	3949.94	3432.63	3205.38	2829.44
ENSMUSG00000093077	Mir5105	FALSE	0.576268	0.203494	2.83186	0.0046278	0.0877423	72721.7	50121.7	47694.7	77537.5	106552	70178.8
ENSMUSG00000041540	Sox5	TRUE	1.89676	0.669875	2.83152	0.00463275	0.0877423	15.4659	19.7245	23.1108	13.7397	112.791	90.2054
ENSMUSG00000037405	Icam1	TRUE	-0.690005	0.243744	-2.83086	0.00464237	0.0878117	251.579	171.518	236.132	117.932	122.431	167.381
ENSMUSG00000038074	Fkbp14	TRUE	0.243863	0.0861597	2.83036	0.00464952	0.0878341	2577.65	2792.31	2908.95	3320.42	3322.99	3161.2
ENSMUSG00000029763	Exoc4	TRUE	-0.251042	0.0887426	-2.82888	0.00467112	0.0881292	6260.6	6569.12	7189.48	5774.1	5677.14	5371.23
ENSMUSG00000035305	Ror1	TRUE	-0.565995	0.200417	-2.82408	0.00474158	0.0893442	173.218	179.236	193.93	107.627	118.575	142.324
ENSMUSG00000078485	Plekhn1	TRUE	-0.772401	0.273669	-2.82239	0.00476666	0.0896583	98.9818	150.935	122.588	74.4232	82.9061	61.1392
ENSMUSG00000066800	Rnasel	TRUE	-0.294008	0.104179	-2.82214	0.00477042	0.0896583	709.369	728.092	705.383	554.167	600.587	592.349
ENSMUSG00000000708	Kat2b	TRUE	-0.454508	0.161284	-2.81805	0.00483159	0.0906923	799.072	740.956	918.404	548.442	534.07	710.618
ENSMUSG00000021326	Trim27	TRUE	0.290653	0.103195	2.81655	0.00485424	0.0910015	706.276	685.212	746.58	826.67	894.615	892.032
ENSMUSG00000035778	Ggta1	TRUE	-0.287109	0.102024	-2.81414	0.0048908	0.0915704	1871.37	2065.93	2213.62	1629.3	1756.45	1654.77
ENSMUSG00000004319	Clcn3	TRUE	-0.373965	0.133011	-2.81153	0.00493062	0.0921705	620.698	714.37	619.973	555.312	469.48	486.107
ENSMUSG00000050222	Il17d	TRUE	1.14753	0.408196	2.81122	0.00493536	0.0921705	40.2113	17.1518	26.1253	56.1037	70.3738	57.1301
ENSMUSG00000030256	Bhlhe41	TRUE	-0.66486	0.236686	-2.80904	0.00496897	0.0926807	550.586	517.125	543.607	459.134	325.84	232.53
ENSMUSG00000026358	Rgs1	TRUE	-1.28489	0.457661	-2.80751	0.00499266	0.0929715	170.125	397.063	244.171	44.6539	171.596	116.265
ENSMUSG00000022389	Tef	TRUE	-0.320085	0.114036	-2.80687	0.00500253	0.0929715	1963.14	1950.15	2079.97	1681.96	1396.87	1722.92
ENSMUSG00000060012	Kif13b	TRUE	-0.324194	0.115511	-2.80661	0.00500665	0.0929715	627.916	671.491	608.92	479.744	533.106	511.164
ENSMUSG00000046182	Gsg1l	TRUE	-5.19409	1.8508	-2.8064	0.0050098	0.0929715	6.18636	1.71518	13.0626	0	0	0
ENSMUSG00000090084	Srpx	TRUE	-0.779036	0.277644	-2.80588	0.00501795	0.0930056	1771.36	1446.75	2094.04	1150.7	584.199	1361.1
ENSMUSG00000034641	Cd300ld	TRUE	-0.602993	0.214962	-2.80512	0.00502981	0.0931083	1528.03	1532.51	876.202	885.064	794.356	913.079
ENSMUSG00000046006	Gapt	TRUE	-1.26611	0.451524	-2.80408	0.00504611	0.0932928	36.0871	39.449	28.1349	12.5947	15.4244	15.0342
ENSMUSG00000059921	Unc5c	TRUE	0.356627	0.127272	2.80208	0.00507742	0.0936241	2617.86	2748.57	2629.61	3575.75	3808.86	2854.5
ENSMUSG00000033585	Ndn	TRUE	0.377567	0.134754	2.80189	0.00508038	0.0936241	1254.8	1133.73	1006.83	1622.43	1486.53	1302.97
ENSMUSG00000046714	Foxc2	TRUE	0.442387	0.157898	2.80172	0.00508309	0.0936241	454.697	542.853	393.889	641.185	582.271	669.525
ENSMUSG00000038068	Rnf144b	TRUE	-0.671272	0.239654	-2.801	0.00509438	0.0937151	185.591	160.369	180.867	129.382	120.503	81.1849
ENSMUSG00000070371	Prss36	TRUE	0.657865	0.235041	2.79894	0.00512702	0.0941977	62.8947	66.0342	71.3421	99.6126	110.863	105.24
ENSMUSG00000061232	H2-K1	TRUE	-0.657343	0.234915	-2.79821	0.00513863	0.0942935	3490.14	3074.45	4800.02	1897.22	2036.98	3270.45
ENSMUSG00000035284	Vps13c	TRUE	-0.265587	0.0949513	-2.79708	0.00515665	0.0945066	2438.46	2563.33	2473.86	1886.91	2163.27	2166.94
ENSMUSG00000039578	Ccser1	TRUE	1.52439	0.545192	2.79605	0.00517307	0.0946744	10.3106	17.1518	7.03373	43.509	31.8128	25.0571
ENSMUSG00000001750	Tcirg1	TRUE	-0.335426	0.119996	-2.79532	0.00518489	0.0946744	1464.11	1489.63	1206.79	1149.55	1075.85	1073.44
ENSMUSG00000071637	Cebpd	FALSE	0.793864	0.283999	2.7953	0.00518508	0.0946744	392.834	241.84	168.81	508.368	452.128	431.984
ENSMUSG00000060671	Atp8b2	TRUE	0.221837	0.0793819	2.79455	0.00519722	0.0947472	5851.27	5220.14	5356.69	6403.83	6345.21	6407.59
ENSMUSG00000005836	Gata6	TRUE	1.30169	0.465907	2.79389	0.00520781	0.0947472	65.9878	78.0405	67.3228	73.2782	138.82	308.703
ENSMUSG00000050288	Fzd2	TRUE	0.502774	0.179957	2.79386	0.00520836	0.0947472	979.507	866.163	965.631	1059.1	1242.63	1679.83
ENSMUSG00000040466	Blvrb	TRUE	-0.361527	0.129462	-2.79253	0.00522975	0.095019	584.611	554.002	581.79	397.306	486.833	453.032
ENSMUSG00000003546	Klc4	TRUE	-0.348284	0.124825	-2.79018	0.00526787	0.0955937	472.226	471.673	480.303	390.436	343.193	385.879
ENSMUSG00000022014	Epsti1	TRUE	-1.0528	0.377671	-2.7876	0.00530996	0.096239	85.578	88.3315	112.54	41.219	68.4458	28.0639
ENSMUSG00000031442	Mcf2l	TRUE	-0.692577	0.248625	-2.78563	0.00534232	0.0967065	350.56	518.84	471.26	353.797	197.625	279.637
ENSMUSG00000019848	Popdc3	TRUE	-3.01377	1.08255	-2.78396	0.00537002	0.0970886	88.6712	18.0093	2.00964	4.57989	3.8561	5.01141
ENSMUSG00000034818	Celf5	TRUE	-0.437114	0.157045	-2.78336	0.00537989	0.0971479	391.803	464.812	498.39	311.433	368.257	320.73
ENSMUSG00000041577	Prelp	TRUE	0.729975	0.262646	2.77931	0.00544743	0.0981585	5368.73	3254.54	3141.06	6453.07	8606.81	4451.14
ENSMUSG00000031807	Pgls	TRUE	0.331439	0.119257	2.77921	0.00544918	0.0981585	559.866	490.54	510.448	677.824	614.084	671.529
ENSMUSG00000060548	Tnfrsf19	TRUE	-2.819	1.01723	-2.77125	0.00558423	0.100428	275.293	367.905	2631.62	216.4	96.4025	151.345
ENSMUSG00000027004	Frzb	TRUE	1.21916	0.440011	2.77075	0.0055928	0.100428	79.3916	51.4553	87.4192	79.0031	154.244	273.623
ENSMUSG00000022490	Ppp1r1a	TRUE	1.52831	0.551622	2.77058	0.00559562	0.100428	13.4038	14.579	5.02409	37.7841	26.0287	32.073
ENSMUSG00000074405	Zfp865	TRUE	0.426031	0.153867	2.76884	0.00562571	0.100845	446.449	415.072	331.59	515.238	523.465	564.285
ENSMUSG00000026938	Fcna	TRUE	-0.792012	0.28609	-2.7684	0.00563321	0.100857	194.87	246.128	124.597	107.627	101.223	118.269
ENSMUSG00000032372	Plscr2	TRUE	-0.926306	0.334789	-2.76684	0.0056603	0.101217	112.386	168.945	202.973	114.497	82.9061	58.1324
ENSMUSG00000033460	Armcx1	TRUE	0.364779	0.131858	2.76645	0.00566703	0.101217	827.941	962.213	890.269	1101.46	1309.15	1041.37
ENSMUSG00000024397	Aif1	TRUE	-0.965291	0.349054	-2.76544	0.00568452	0.101406	78.3606	82.3284	105.506	64.1185	31.8128	41.0936
ENSMUSG00000026158	Ogfrl1	TRUE	-0.432928	0.156689	-2.76298	0.00572758	0.102051	679.469	743.528	787.778	582.791	609.264	446.016
ENSMUSG00000031503	Col4a2	TRUE	0.594853	0.21536	2.76213	0.0057426	0.102195	18675.6	13561.9	15660.1	17605.1	22387.5	32345.7
ENSMUSG00000025213	Kazald1	TRUE	0.993227	0.359677	2.76145	0.0057546	0.102285	407.269	366.19	387.86	312.578	974.629	1023.33
ENSMUSG00000020387	Phf15	TRUE	-0.523306	0.189616	-2.75983	0.00578322	0.10267	888.774	1014.53	939.505	539.282	583.235	854.947
ENSMUSG00000012819	Cdh23	TRUE	-0.963061	0.349024	-2.7593	0.00579251	0.102711	176.311	211.824	302.45	167.166	119.539	68.1552
ENSMUSG00000030397	Mark4	TRUE	0.315425	0.114384	2.75759	0.00582293	0.103126	756.798	763.253	654.137	858.729	917.752	929.116
ENSMUSG00000031838	Ifi30	TRUE	-0.375999	0.136379	-2.75701	0.00583332	0.103186	1044.46	1082.28	1139.46	720.188	830.025	965.198
ENSMUSG00000032702	Kank1	TRUE	-0.53207	0.19321	-2.75384	0.00588998	0.104025	673.282	911.616	889.264	674.389	588.055	450.025
ENSMUSG00000079852	Klra4	TRUE	-2.13618	0.775784	-2.75357	0.00589485	0.104025	17.528	38.5914	62.2987	19.4645	3.8561	4.00913
ENSMUSG00000026051	1500015O10Rik	TRUE	-0.997434	0.362767	-2.74952	0.00596829	0.105195	68.05	77.1829	120.578	41.219	34.7049	57.1301
ENSMUSG00000015839	Nfe2l2	TRUE	-0.24602	0.0894997	-2.74884	0.00598071	0.105288	3575.72	3503.25	3639.45	3273.48	2869.9	2896.6
ENSMUSG00000086290	Snhg12	FALSE	0.636386	0.231712	2.74645	0.00602435	0.105929	699.059	650.051	777.73	1469	1096.1	741.689
ENSMUSG00000046841	Ckap4	TRUE	0.186947	0.0681192	2.74442	0.00606185	0.106462	12683.1	13515.6	13093.8	14767.9	14616.5	15345.9
ENSMUSG00000032726	Bmp8a	TRUE	-1.59248	0.580378	-2.74387	0.00607188	0.106511	24.7454	23.1549	48.2313	8.01481	8.67622	15.0342
ENSMUSG00000036446	Lum	TRUE	4.24692	1.54959	2.74067	0.00613144	0.107428	11.3417	16.2942	16.0771	16.0296	18.3165	795.812
ENSMUSG00000041797	Abca9	TRUE	-0.65154	0.237782	-2.74007	0.00614253	0.107494	432.014	476.819	547.626	204.95	345.121	375.856
ENSMUSG00000074785	Plxnc1	TRUE	-0.773755	0.282425	-2.73968	0.00614992	0.107496	1197.06	1397.87	2717.03	1220.54	899.435	987.248
ENSMUSG00000037921	Ddx60	TRUE	-0.824985	0.301215	-2.73885	0.00616537	0.107552	73.2053	64.3191	79.3807	45.7989	34.7049	42.0959
ENSMUSG00000031586	Rbpms	TRUE	0.518698	0.189394	2.73873	0.00616775	0.107552	479.443	497.401	334.605	571.341	711.45	596.358
ENSMUSG00000062980	Cped1	TRUE	0.462261	0.168818	2.73821	0.00617741	0.107593	463.977	463.955	579.78	571.341	747.119	756.723
ENSMUSG00000032402	Smad3	TRUE	-0.426187	0.155863	-2.73438	0.00624988	0.108727	2111.61	2266.6	2528.12	2093.01	1542.44	1506.43
ENSMUSG00000052512	Nav2	TRUE	-0.543945	0.198977	-2.73371	0.0062625	0.108818	4406.75	5446.54	4215.21	2286.51	3886.95	3474.91
ENSMUSG00000034424	Gcsh	TRUE	0.327664	0.119898	2.73286	0.00627874	0.108943	880.525	883.315	788.783	1096.88	1150.08	957.18
ENSMUSG00000028737	Aldh4a1	TRUE	-0.636404	0.232919	-2.7323	0.00628941	0.108943	446.449	577.156	748.59	316.012	469.48	353.806
ENSMUSG00000020282	Rhbdf1	TRUE	0.286777	0.104963	2.73217	0.00629187	0.108943	1259.96	1174.04	1322.34	1470.14	1457.61	1652.76
ENSMUSG00000026828	Galnt5	TRUE	0.976476	0.357534	2.73114	0.00631161	0.109157	62.8947	35.1611	37.1783	101.903	97.3665	66.1507
ENSMUSG00000000948	Snrpn	TRUE	0.556039	0.204068	2.72477	0.00643467	0.111155	249.517	176.663	272.306	324.027	375.97	324.74
ENSMUSG00000031737	Irx5	TRUE	-0.304515	0.11181	-2.7235	0.00645947	0.111452	713.494	779.547	774.715	599.966	583.235	653.488
ENSMUSG00000031951	Tmem231	TRUE	0.479853	0.176267	2.7223	0.00648296	0.111727	193.839	164.657	220.055	257.619	267.999	279.637
ENSMUSG00000028766	Alpl	TRUE	-0.538416	0.19791	-2.72051	0.00651815	0.112149	25434.2	24530.4	40855.9	23410.1	19364.4	19758
ENSMUSG00000040447	Spns2	TRUE	0.386743	0.14217	2.72028	0.00652266	0.112149	358.809	314.735	341.638	445.394	400.07	481.096
ENSMUSG00000036198	Arhgap36	TRUE	-2.19443	0.807365	-2.71801	0.00656758	0.112465	15.4659	36.0187	32.1542	13.7397	1.92805	3.00685
ENSMUSG00000000627	Sema4f	TRUE	-1.14467	0.421158	-2.71792	0.00656944	0.112465	122.696	124.35	312.499	104.193	56.8775	92.21
ENSMUSG00000038150	Ormdl3	TRUE	0.318027	0.117012	2.71789	0.00656995	0.112465	1670.32	1397.87	1445.93	1935	1981.07	1709.89
ENSMUSG00000057604	Lmcd1	TRUE	1.40215	0.515911	2.71781	0.00657156	0.112465	787.73	349.038	403.937	1755.24	1595.46	720.641
ENSMUSG00000024769	Cdc42bpg	TRUE	-0.26541	0.0976918	-2.71681	0.00659147	0.112575	1586.8	1542.8	1731.3	1360.23	1277.33	1406.2
ENSMUSG00000038151	Prdm1	TRUE	-1.40455	0.517014	-2.71665	0.00659459	0.112575	31.9629	56.6008	30.1446	21.7545	12.5323	11.0251
ENSMUSG00000039997	Ifi203	TRUE	-0.620087	0.228281	-2.71633	0.00660094	0.112575	136.1	136.356	124.597	73.2782	100.259	84.1917
ENSMUSG00000004263	Atn1	TRUE	0.234055	0.0862215	2.71458	0.006636	0.113042	3023.07	3029	2837.61	3286.07	3481.09	3687.4
ENSMUSG00000033355	Rtp4	TRUE	-0.685905	0.252782	-2.71343	0.0066591	0.113251	144.348	138.072	165.795	77.8581	80.9781	119.272
ENSMUSG00000068267	Cenpb	TRUE	-0.206929	0.0762672	-2.7132	0.00666362	0.113251	4896.5	4716.73	4760.83	4179.15	4327.51	3945.99
ENSMUSG00000062082	Cd200r4	TRUE	-1.29395	0.477371	-2.71057	0.00671678	0.114023	53.6151	30.0156	31.1494	18.3196	13.4963	15.0342
ENSMUSG00000059810	Rgs3	TRUE	0.726342	0.268111	2.70911	0.00674634	0.114339	1365.12	968.216	635.045	2030.04	1599.32	1281.92
ENSMUSG00000040594	Ranbp17	TRUE	0.618046	0.228155	2.70889	0.00675091	0.114339	97.9507	86.6163	71.3421	127.092	128.215	137.313
ENSMUSG00000033949	Trim36	TRUE	-0.802625	0.296402	-2.70789	0.00677126	0.114552	81.4537	111.486	81.3903	61.8285	52.0573	44.1004
ENSMUSG00000032359	Ctsh	TRUE	0.354252	0.130878	2.70674	0.00679471	0.114817	2888	3685.91	2937.08	3708.57	4065.29	4385.99
ENSMUSG00000010277	2610507B11Rik	TRUE	-0.230113	0.0850583	-2.70535	0.00682321	0.115057	7647.37	7509.89	7948.11	6399.25	6225.67	7073.11
ENSMUSG00000020900	Myh10	TRUE	0.654215	0.241828	2.70528	0.00682458	0.115057	4004.64	4594.95	3419.4	8583.86	6297.97	4035.19
ENSMUSG00000003545	Fosb	TRUE	-0.707997	0.261994	-2.70234	0.00688534	0.115914	286.635	315.592	249.195	177.471	227.51	116.265
ENSMUSG00000060470	Gpr97	TRUE	-1.91456	0.708555	-2.70206	0.00689114	0.115914	28.8697	253.846	55.265	20.6095	26.9927	42.0959
ENSMUSG00000034786	Gpsm3	TRUE	-0.56672	0.209769	-2.70164	0.00689989	0.115929	285.604	325.883	286.373	149.991	220.762	234.534
ENSMUSG00000026950	Neb	TRUE	0.943383	0.349576	2.69865	0.00696216	0.116842	63.9257	97.765	39.1879	132.817	114.719	140.32
ENSMUSG00000042988	Notum	TRUE	-1.22694	0.455401	-2.69418	0.00705613	0.118178	78.3606	48.8825	113.544	25.1894	51.0933	26.0593
ENSMUSG00000055302	Mrfap1	TRUE	0.339457	0.126	2.6941	0.00705781	0.118178	2265.24	1785.5	1761.45	2368.95	2461.16	2521.74
ENSMUSG00000026790	Odf2	TRUE	0.217521	0.0809001	2.68876	0.00717178	0.11995	1899.21	1773.49	1760.44	2082.71	2135.31	2097.78
ENSMUSG00000022040	Ephx2	TRUE	0.67301	0.250519	2.68646	0.00722127	0.120641	240.237	291.58	273.311	297.693	580.343	404.922
ENSMUSG00000036139	Hoxc9	TRUE	0.637921	0.237614	2.6847	0.00725954	0.121143	221.678	208.394	184.887	412.19	314.272	231.527
ENSMUSG00000036737	Oxsr1	TRUE	0.314758	0.117268	2.68408	0.007273	0.12123	2436.39	2121.67	2183.47	3110.89	2762.9	2511.72
ENSMUSG00000024594	Prrc1	TRUE	0.2464	0.0918317	2.68316	0.0072929	0.121425	3474.67	3279.41	3280.73	4294.79	3707.64	3902.89
ENSMUSG00000040713	Creg1	TRUE	-0.313352	0.116829	-2.68214	0.00731537	0.121661	1474.42	1257.22	1449.95	1152.99	1185.75	1025.34
ENSMUSG00000072620	Slfn2	TRUE	-0.497587	0.18555	-2.68169	0.00732508	0.121685	600.077	523.986	419.009	314.867	366.329	410.936
ENSMUSG00000056529	Ptafr	TRUE	-0.928754	0.346436	-2.68088	0.00734287	0.121844	167.032	96.9074	142.684	83.583	85.7982	44.1004
ENSMUSG00000074505	Fat3	TRUE	-1.39761	0.521562	-2.67966	0.00736977	0.122153	2022.94	1884.12	3392.27	1520.52	717.234	533.214
ENSMUSG00000026832	Cytip	TRUE	-1.0709	0.399915	-2.67781	0.00741046	0.122689	184.56	193.815	73.3518	92.7428	61.6976	61.1392
ENSMUSG00000041075	Fzd7	TRUE	0.395662	0.147797	2.67707	0.00742701	0.122825	1917.77	1622.56	1429.86	1968.21	2472.72	2095.77
ENSMUSG00000002668	Dennd1c	TRUE	-0.736497	0.275164	-2.67657	0.007438	0.122869	150.535	127.781	115.554	93.8878	56.8775	86.1963
ENSMUSG00000031026	Trim66	TRUE	0.768314	0.287188	2.6753	0.00746622	0.123027	186.622	144.075	255.224	440.814	311.38	245.559
ENSMUSG00000032575	Manf	TRUE	0.496185	0.185469	2.6753	0.00746623	0.123027	4311.89	3900.31	2561.28	4931.4	5451.56	4812.96
ENSMUSG00000053216	Btn2a2	TRUE	3.16368	1.1828	2.67473	0.00747896	0.123027	3.09318	0.857588	0	18.3196	10.6043	6.0137
ENSMUSG00000048616	Nog	TRUE	0.936155	0.350012	2.67464	0.007481	0.123027	215.492	150.078	104.501	200.37	261.251	436.995
ENSMUSG00000020363	Gfpt2	TRUE	1.31223	0.490821	2.67353	0.00750568	0.123296	79.3916	56.6008	73.3518	56.1037	185.093	277.632
ENSMUSG00000033751	Gadd45gip1	TRUE	0.433788	0.162373	2.67155	0.00755024	0.123733	222.709	239.267	237.137	270.214	334.517	338.772
ENSMUSG00000074874	Ctla2b	TRUE	-0.513676	0.192281	-2.67149	0.0075516	0.123733	359.84	266.71	268.287	206.095	228.474	191.436
ENSMUSG00000075602	Ly6a	TRUE	0.267	0.0999542	2.67123	0.00755747	0.123733	5099.62	5594.9	4876.38	5987.06	5964.42	6786.46
ENSMUSG00000020393	Kremen1	TRUE	0.569443	0.213371	2.66879	0.00761241	0.124436	4663.48	3672.19	3559.07	8018.24	4668.77	4965.31
ENSMUSG00000001418	0610031J06Rik	TRUE	-0.285039	0.106813	-2.66858	0.00761733	0.124436	2497.23	2569.33	2746.17	1913.25	2182.55	2314.27
ENSMUSG00000031770	Herpud1	TRUE	0.315084	0.118103	2.66789	0.00763301	0.124554	1755.9	1561.67	1966.43	2055.23	2216.29	2299.24
ENSMUSG00000031673	Cdh11	TRUE	-0.443393	0.16624	-2.66718	0.0076491	0.124617	14809.1	15266.8	18399.2	10955.1	9926.56	14766.6
ENSMUSG00000079017	Ifi27l2a	TRUE	-0.977565	0.366562	-2.66684	0.00765672	0.124617	241.268	113.202	265.272	87.0179	84.8342	142.324
ENSMUSG00000027253	Lrp4	TRUE	-0.548971	0.205869	-2.6666	0.00766222	0.124617	6492.59	5715.82	6921.19	4998.95	5152.71	2923.66
ENSMUSG00000054074	Skida1	TRUE	0.821097	0.308059	2.66539	0.00768996	0.124815	50.5219	35.1611	48.2313	80.1481	66.5177	89.2032
ENSMUSG00000029570	Lfng	TRUE	0.493337	0.185115	2.66503	0.00769805	0.124815	1259.96	941.631	1038.98	1899.51	1274.44	1388.16
ENSMUSG00000071715	Ncf4	TRUE	-0.654774	0.245711	-2.66481	0.00770312	0.124815	417.579	419.36	235.128	235.864	213.049	232.53
ENSMUSG00000031712	Il15	TRUE	-0.653654	0.245312	-2.66459	0.00770831	0.124815	166.001	162.084	121.583	84.728	87.7263	113.258
ENSMUSG00000039903	Eva1c	TRUE	-0.90016	0.337916	-2.66386	0.00772499	0.12489	195.901	225.546	237.137	68.6984	102.187	181.413
ENSMUSG00000038024	Dennd4c	TRUE	-0.24716	0.0927902	-2.66365	0.00772985	0.12489	1405.33	1542.8	1515.27	1198.79	1292.76	1268.89
ENSMUSG00000000374	Trappc10	TRUE	-0.238349	0.0895469	-2.66172	0.00777417	0.125453	1892	2064.21	1910.16	1607.54	1628.24	1737.96
ENSMUSG00000026249	Serpine2	TRUE	-0.270024	0.10146	-2.6614	0.00778173	0.125453	11150.9	9440.32	10476.2	8099.54	9230.54	8431.2
ENSMUSG00000039959	Hip1	TRUE	0.304368	0.11439	2.66079	0.00779574	0.125541	5428.53	4796.49	4437.28	6319.1	6314.36	5472.46
ENSMUSG00000045817	Zfp36l2	TRUE	0.301522	0.113347	2.66016	0.00781025	0.125638	4329.42	3631.03	3869.56	4697.82	5362.87	4516.29
ENSMUSG00000004843	Chmp2b	TRUE	0.354314	0.133216	2.65971	0.0078209	0.125672	2110.58	1712.6	1741.35	2596.8	2424.52	2091.76
ENSMUSG00000043004	Gng2	TRUE	-0.511418	0.192401	-2.65809	0.0078585	0.126138	1524.94	1244.36	1096.26	899.948	713.378	1098.5
ENSMUSG00000003534	Ddr1	TRUE	0.466087	0.175372	2.65771	0.00786725	0.126141	2810.67	3129.34	2344.24	2988.38	4511.64	3942.98
ENSMUSG00000026932	Nacc2	TRUE	-0.331771	0.124874	-2.65685	0.00788743	0.126261	2292.05	2840.33	2510.04	1954.47	2245.21	1873.27
ENSMUSG00000074682	Zcchc3	TRUE	0.607081	0.228538	2.65637	0.00789864	0.126261	104.137	92.6195	105.506	185.486	133.035	142.324
ENSMUSG00000030409	Dmpk	TRUE	-0.263073	0.0990376	-2.6563	0.0079004	0.126261	6680.24	6938.74	5966.61	5751.2	5072.7	5499.52
ENSMUSG00000054626	Xlr	TRUE	-6.24634	2.35189	-2.65588	0.00791024	0.126281	90.7333	153.508	0	2.28995	0.964025	0
ENSMUSG00000017737	Mmp9	TRUE	-3.28873	1.24037	-2.65141	0.00801556	0.127785	514.499	180.951	150.723	4.57989	6.74817	75.1712
ENSMUSG00000051864	Tbc1d22a	TRUE	-0.245023	0.0924215	-2.65115	0.00802177	0.127785	982.6	963.928	965.631	791.176	825.205	839.913
ENSMUSG00000038179	Slamf7	TRUE	-2.6925	1.01574	-2.65078	0.00803055	0.127786	9.27954	14.579	17.0819	4.57989	1.92805	0
ENSMUSG00000020869	Lrrc59	TRUE	0.222061	0.0837968	2.64999	0.00804937	0.127935	7920.6	8235.41	7530.11	9087.65	8762.99	9778.27
ENSMUSG00000032564	Cpne4	TRUE	-5.26865	1.98857	-2.64946	0.00806199	0.127935	4.12424	0.857588	17.0819	0	0	0
ENSMUSG00000021390	Ogn	TRUE	-0.304044	0.114768	-2.6492	0.00806832	0.127935	39616.4	39580.2	47357.1	30768.8	35602.4	36132.3
ENSMUSG00000035929	H2-Q4	TRUE	-1.12247	0.423746	-2.64892	0.00807487	0.127935	288.697	183.524	465.231	103.048	91.5824	235.536
ENSMUSG00000005102	Eif2ak4	TRUE	0.284296	0.107339	2.64857	0.00808328	0.127935	653.692	668.061	709.402	865.599	834.845	773.762
ENSMUSG00000027171	Prrg4	TRUE	-0.832151	0.314497	-2.64598	0.00814556	0.128782	180.436	112.344	99.477	59.5386	81.9421	78.178
ENSMUSG00000026043	Col3a1	TRUE	0.537647	0.203263	2.64508	0.00816721	0.128952	95595.8	56617.1	83423.1	134946	93586.6	113516
ENSMUSG00000023186	Vwa5a	TRUE	-0.253042	0.0956752	-2.6448	0.00817384	0.128952	3440.65	3869.44	3884.63	3341.03	3043.43	3011.86
ENSMUSG00000037541	Shank2	TRUE	-1.29479	0.489751	-2.64376	0.00819904	0.129088	121.665	283.861	105.506	116.787	46.2732	46.105
ENSMUSG00000024308	Tapbp	TRUE	-0.488418	0.184746	-2.64372	0.00819994	0.129088	2808.61	3839.42	3843.43	2068.97	2329.08	3080.01
ENSMUSG00000006642	Tcf23	TRUE	3.87379	1.46559	2.64315	0.00821377	0.129167	1.03106	0.857588	0	3.43492	17.3524	7.01598
ENSMUSG00000025880	Smad7	TRUE	0.384772	0.145647	2.64182	0.00824627	0.12954	1521.84	1855.82	1782.55	2122.78	2640.46	1974.5
ENSMUSG00000057228	Aadat	TRUE	2.09571	0.794342	2.6383	0.00833223	0.130702	4.12424	3.43035	4.01927	17.1746	24.1006	8.01826
ENSMUSG00000029161	Cgref1	TRUE	0.478961	0.181564	2.63797	0.00834042	0.130702	684.624	454.521	589.828	736.217	911.967	758.728
ENSMUSG00000022378	Fam49b	TRUE	-0.242368	0.091886	-2.63771	0.00834681	0.130702	1556.9	1669.72	1655.94	1459.84	1342.89	1327.02
ENSMUSG00000049115	Agtr1a	TRUE	1.27159	0.482943	2.633	0.00846348	0.132298	72.1742	22.2973	23.1108	108.772	83.8702	90.2054
ENSMUSG00000000732	Icosl	TRUE	-0.63926	0.2428	-2.63287	0.00846673	0.132298	143.317	103.768	144.694	87.0179	81.9421	82.1872
ENSMUSG00000025432	Avil	TRUE	-1.39054	0.528271	-2.63224	0.00848229	0.132401	56.7083	138.072	281.349	42.364	84.8342	54.1233
ENSMUSG00000042485	Mustn1	TRUE	0.680632	0.258652	2.63146	0.00850185	0.132566	589.766	407.354	641.074	578.211	946.672	1098.5
ENSMUSG00000049036	Tmem121	TRUE	0.975141	0.370735	2.63029	0.00853115	0.132766	30.9318	24.87	25.1205	49.2338	43.3811	66.1507
ENSMUSG00000028455	Stoml2	TRUE	0.316924	0.120493	2.63023	0.00853272	0.132766	742.363	640.618	669.209	782.016	864.73	907.066
ENSMUSG00000034755	Pcdh11x	TRUE	4.05039	1.54155	2.62748	0.00860205	0.133704	4.12424	0	0	50.3788	15.4244	1.00228
ENSMUSG00000023909	Paqr4	TRUE	0.495686	0.188753	2.62611	0.00863665	0.1341	178.373	185.239	188.906	234.719	232.33	311.71
ENSMUSG00000018909	Arrb1	TRUE	-0.338287	0.128843	-2.62558	0.00865021	0.134169	3264.34	3361.74	3203.36	2509.78	2236.54	3028.9
ENSMUSG00000026640	Plxna2	TRUE	-0.519092	0.197857	-2.62356	0.0087015	0.134823	3202.47	3146.49	2588.41	1460.99	2445.73	2328.3
ENSMUSG00000071540	3425401B19Rik	TRUE	1.17888	0.449503	2.62263	0.00872549	0.135053	81.4537	37.7339	89.4289	182.051	213.049	76.1735
ENSMUSG00000055254	Ntrk2	TRUE	1.98137	0.755679	2.62197	0.00874225	0.13517	71.1431	8.57588	7.03373	81.2931	94.4744	165.377
ENSMUSG00000028041	Adam15	TRUE	-0.252877	0.09646	-2.62157	0.00875255	0.135187	4320.14	4991.16	4718.63	3703.99	3910.08	4160.48
ENSMUSG00000008496	Pou2f2	TRUE	-1.16838	0.446083	-2.6192	0.00881354	0.135987	28.8697	43.737	46.2217	20.6095	13.4963	19.0434
ENSMUSG00000033910	Gucy1a3	TRUE	1.36114	0.519843	2.61837	0.0088351	0.136158	60.8325	30.0156	16.0771	120.222	53.0214	101.231
ENSMUSG00000034422	Parp14	TRUE	-0.538493	0.205684	-2.61806	0.00884309	0.136158	703.183	748.674	795.816	392.726	475.264	678.545
ENSMUSG00000078439	2210404O07Rik	TRUE	-1.04219	0.398476	-2.61545	0.00891107	0.137061	45.3666	40.3066	35.1686	18.3196	21.2085	19.0434
ENSMUSG00000052248	Gm13476	FALSE	-0.498749	0.191047	-2.61061	0.00903807	0.138796	175.28	163.799	159.766	111.062	128.215	113.258
ENSMUSG00000042271	Nxt2	TRUE	-0.277146	0.106169	-2.61042	0.00904316	0.138796	621.729	620.893	627.007	532.412	512.861	498.134
ENSMUSG00000001755	Coasy	TRUE	0.307844	0.117944	2.61008	0.00905215	0.138796	404.176	373.908	404.942	493.483	482.012	488.112
ENSMUSG00000019577	Pdk4	TRUE	-0.511732	0.196121	-2.60927	0.00907351	0.138979	10855	14990.6	12218.6	8699.5	11256.9	6741.35
ENSMUSG00000034867	Ankrd27	TRUE	0.269386	0.103264	2.60871	0.0090883	0.139061	1848.69	1839.53	2040.79	2113.62	2314.62	2474.64
ENSMUSG00000028016	Ints12	TRUE	-0.300073	0.115072	-2.6077	0.00911531	0.13933	919.706	883.315	1018.89	819.8	723.019	749.707
ENSMUSG00000070287	Slc35g2	TRUE	1.22098	0.468305	2.60723	0.00912767	0.139361	19.5901	21.4397	20.0964	28.6243	70.3738	43.0982
ENSMUSG00000040354	Mars	TRUE	0.248257	0.0952341	2.60681	0.00913912	0.139361	2050.78	1895.27	1891.07	2480.01	2279.92	2173.95
ENSMUSG00000024511	Rab27b	TRUE	0.304427	0.116793	2.60656	0.00914574	0.139361	1373.37	1312.11	1226.88	1722.04	1420.01	1690.85
ENSMUSG00000062949	Atp11c	TRUE	-0.260881	0.100117	-2.60577	0.0091667	0.139397	1176.44	1065.98	1059.08	953.762	893.651	908.068
ENSMUSG00000052459	Atp6v1a	TRUE	-0.256014	0.098249	-2.60576	0.00916697	0.139397	5262.53	4893.39	5413.96	4323.42	4715.05	3998.11
ENSMUSG00000038539	Atf5	TRUE	0.474472	0.182157	2.60474	0.00919442	0.13967	6809.12	5657.51	6975.45	11596.3	8174.93	7242.49
ENSMUSG00000055022	Cntn1	TRUE	1.8872	0.725316	2.6019	0.00927093	0.140687	43.3045	7.71829	5.02409	44.6539	75.1939	86.1963
ENSMUSG00000031273	Col4a6	TRUE	1.07828	0.414528	2.60123	0.00928894	0.1408	40.2113	30.8732	19.0916	56.1037	83.8702	50.1141
ENSMUSG00000043587	Acpl2	TRUE	-0.405697	0.155982	-2.60092	0.00929751	0.1408	2874.6	3575.28	3570.12	2080.42	2548.88	2933.68
ENSMUSG00000039530	Tusc3	TRUE	0.238317	0.0916561	2.60012	0.00931904	0.140982	2433.3	2480.14	2288.98	2958.61	2914.25	2624.98
ENSMUSG00000021054	Sgpp1	TRUE	-0.274516	0.105593	-2.59975	0.00932918	0.14099	1543.5	1491.34	1660.97	1189.63	1390.12	1299.96
ENSMUSG00000049721	Gal3st1	TRUE	0.931899	0.359061	2.59538	0.0094487	0.14265	85.578	87.4739	81.3903	88.1629	158.1	238.543
ENSMUSG00000031907	Zfp90	TRUE	0.343445	0.132467	2.59268	0.00952318	0.143536	378.399	326.741	371.783	460.279	432.847	472.075
ENSMUSG00000033740	St18	TRUE	-2.0405	0.78717	-2.5922	0.00953648	0.143536	23.7144	17.1518	10.0482	4.57989	5.78415	2.00457
ENSMUSG00000048120	Entpd1	TRUE	-0.428029	0.165133	-2.59202	0.00954152	0.143536	421.704	477.676	537.578	406.465	348.013	314.717
ENSMUSG00000026672	Optn	TRUE	0.336066	0.129663	2.59184	0.00954635	0.143536	2167.29	2091.66	1729.29	2302.54	2787	2468.62
ENSMUSG00000018830	Myh11	TRUE	-0.844185	0.326021	-2.58936	0.00961558	0.14443	539.244	1354.13	904.337	717.898	430.919	410.936
ENSMUSG00000072964	Bhlhb9	TRUE	0.65416	0.252703	2.58865	0.00963527	0.144578	617.605	410.784	722.465	650.344	1045	1057.41
ENSMUSG00000069830	Nlrp1a	TRUE	-0.978019	0.377943	-2.58774	0.0096607	0.144812	46.3977	53.1704	38.1831	22.8995	25.0646	22.0502
ENSMUSG00000030208	Emp1	TRUE	0.386762	0.149516	2.58677	0.00968799	0.145074	31229.8	28014.8	27177.3	32975.2	33689.8	46326.5
ENSMUSG00000037348	Paqr7	TRUE	-0.416947	0.161518	-2.58143	0.00983905	0.147186	489.754	552.286	631.026	381.276	393.322	478.089
ENSMUSG00000006527	Sfmbt1	TRUE	-0.308447	0.119642	-2.57809	0.00993489	0.148469	831.034	758.965	860.125	690.418	688.314	599.365
ENSMUSG00000039615	Stub1	TRUE	0.255997	0.0994748	2.57348	0.0100681	0.150032	1335.22	1201.48	1240.95	1401.45	1548.22	1558.55
ENSMUSG00000022636	Alcam	TRUE	-0.576175	0.223906	-2.57329	0.0100735	0.150032	3046.78	3724.5	3208.39	3105.17	1983.96	1606.66
ENSMUSG00000006782	Cnp	TRUE	-0.464334	0.180503	-2.57244	0.0100984	0.150032	976.414	1023.96	1204.78	596.531	805.925	919.093
ENSMUSG00000069763	Tmem100	TRUE	-0.829114	0.322309	-2.57242	0.0100991	0.150032	145.379	172.375	187.901	143.122	68.4458	74.1689
ENSMUSG00000020376	Rnf130	TRUE	-0.286585	0.111407	-2.57241	0.0100992	0.150032	878.463	885.03	976.684	724.768	804.961	715.63
ENSMUSG00000045498	Pcdhb3	TRUE	0.792753	0.30818	2.57237	0.0101006	0.150032	41.2424	36.0187	44.212	57.2486	76.158	76.1735
ENSMUSG00000021990	Spata13	TRUE	-0.621462	0.24185	-2.56962	0.010181	0.151074	1178.5	1158.6	1990.55	1164.44	772.184	876.997
ENSMUSG00000031749	St3gal2	TRUE	-0.2233	0.086938	-2.56849	0.0102141	0.151355	2789.02	2983.55	3088.81	2420.47	2639.5	2529.76
ENSMUSG00000048582	Gja3	TRUE	0.908602	0.353778	2.56828	0.0102205	0.151355	78.3606	74.6101	41.1976	83.583	151.352	129.294
ENSMUSG00000011589	Fsd1	TRUE	0.821069	0.319764	2.56774	0.0102365	0.151441	39.1803	42.0218	39.1879	69.8433	55.9134	87.1986
ENSMUSG00000031389	Arhgap4	TRUE	-0.475426	0.18522	-2.56682	0.0102637	0.151558	279.417	253.846	209.002	166.021	187.021	180.411
ENSMUSG00000025477	Inpp5a	TRUE	0.422952	0.1648	2.56646	0.0102743	0.151558	1555.87	1351.56	1330.38	2239.57	1951.19	1491.4
ENSMUSG00000045962	Wnk1	TRUE	-0.220459	0.0859013	-2.56642	0.0102753	0.151558	16769.2	18488.7	16654.9	15348.4	15231.6	13978.8
ENSMUSG00000033501	Crygs	TRUE	-1.96003	0.763909	-2.5658	0.0102939	0.151646	16.497	13.7214	14.0675	4.57989	4.82012	2.00457
ENSMUSG00000021823	Vcl	TRUE	-0.235245	0.0916947	-2.56553	0.0103019	0.151646	42236.3	41841.7	44699.4	39371	33310.9	36721.6
ENSMUSG00000041624	Gucy1a2	TRUE	2.35168	0.917563	2.56297	0.0103781	0.152617	1.03106	5.14553	3.01446	8.01481	12.5323	27.0616
ENSMUSG00000063838	Cdc42ep5	TRUE	0.596802	0.232926	2.5622	0.0104013	0.152804	134.038	152.651	103.496	224.415	164.848	202.461
ENSMUSG00000040997	Abhd4	TRUE	-0.33635	0.131457	-2.55863	0.0105085	0.154226	2493.1	2438.12	3175.23	2062.1	2083.26	2274.18
ENSMUSG00000026342	Slc35f5	TRUE	0.240125	0.093876	2.5579	0.0105308	0.154271	1009.41	942.489	998.79	1111.77	1201.17	1169.66
ENSMUSG00000039462	Col10a1	TRUE	0.613543	0.239868	2.55784	0.0105325	0.154271	634.102	520.556	528.535	596.531	1178.04	798.819
ENSMUSG00000028600	Podn	TRUE	-0.737514	0.288626	-2.55526	0.0106109	0.15508	127.851	120.062	183.882	65.2634	88.6903	104.237
ENSMUSG00000050721	Plekho2	TRUE	-0.177989	0.0696605	-2.55509	0.0106159	0.15508	2944.71	2872.06	2908.95	2600.23	2548.88	2563.84
ENSMUSG00000020882	Cacnb1	TRUE	0.56637	0.221673	2.55498	0.0106193	0.15508	100.013	113.202	126.607	152.281	152.316	198.452
ENSMUSG00000005034	Prkacb	TRUE	-0.260752	0.102102	-2.55382	0.0106547	0.155443	4121.15	4104.41	4162.96	3781.84	3484.95	3075
ENSMUSG00000043008	Klhl6	TRUE	-0.930936	0.364592	-2.55336	0.0106688	0.155494	56.7083	50.5977	65.3132	35.4942	21.2085	34.0776
ENSMUSG00000034390	Cmip	TRUE	-0.280532	0.110016	-2.54991	0.010775	0.156887	4326.33	4343.68	4356.89	4054.35	3468.56	3204.3
ENSMUSG00000057074	Ces1g	TRUE	1.20285	0.471944	2.54871	0.0108123	0.157253	75.2674	46.3097	59.2843	62.9735	112.791	239.546
ENSMUSG00000037166	Ppp1r14a	TRUE	1.21291	0.475957	2.54836	0.0108231	0.157253	61.8636	41.1642	16.0771	95.0327	113.755	67.1529
ENSMUSG00000051343	Rab11fip5	TRUE	-0.276037	0.108346	-2.54772	0.0108428	0.157253	1402.24	1458.76	1381.63	1228.56	1233.95	1042.37
ENSMUSG00000038332	Sesn1	TRUE	-0.449703	0.176512	-2.54772	0.0108428	0.157253	797.009	758.107	1052.05	585.081	582.271	740.687
ENSMUSG00000075284	Wipf1	TRUE	-0.245086	0.0962167	-2.54722	0.0108584	0.157323	2293.08	2246.88	2064.9	1978.51	1846.11	1749.99
ENSMUSG00000071723	Gspt2	TRUE	0.518469	0.203662	2.54573	0.0109049	0.157843	117.541	120.062	98.4722	149.991	156.172	175.399
ENSMUSG00000036503	Rnf13	TRUE	-0.227545	0.0894472	-2.5439	0.0109622	0.158516	2912.74	2926.09	3216.42	2714.73	2479.47	2540.79
ENSMUSG00000010461	Eya4	TRUE	0.56253	0.22136	2.54125	0.0110457	0.159472	2231.21	1524.79	1372.58	3185.31	2348.36	2040.65
ENSMUSG00000003863	Ppfia3	TRUE	0.877235	0.345217	2.54112	0.01105	0.159472	32.9939	31.7307	27.1301	50.3788	50.1293	68.1552
ENSMUSG00000025503	Taldo1	TRUE	-0.1878	0.0739258	-2.54038	0.0110731	0.15965	2438.46	2440.69	2395.49	2164	2152.67	2070.72
ENSMUSG00000045312	Lhfpl2	TRUE	-0.351262	0.138401	-2.53801	0.0111485	0.16058	2139.45	1985.32	2382.42	1487.32	1969.5	1641.74
ENSMUSG00000022610	Mapk12	TRUE	0.623527	0.245779	2.53694	0.0111827	0.160914	82.4848	103.768	83.3999	155.716	111.827	149.34
ENSMUSG00000004383	Large	TRUE	0.23386	0.0921965	2.53653	0.0111956	0.160943	2022.94	1936.43	2232.71	2470.85	2378.25	2431.54
ENSMUSG00000071074	Yipf3	TRUE	0.279427	0.110177	2.53617	0.0112071	0.160952	1688.88	1505.07	1459	1724.33	2008.06	1912.36
ENSMUSG00000032459	Mrps22	TRUE	0.49492	0.195193	2.53554	0.0112273	0.161085	306.225	212.682	218.046	350.362	316.2	370.845
ENSMUSG00000072825	Cep170b	TRUE	-0.237127	0.093544	-2.53493	0.011247	0.16121	3451.99	3817.98	3921.81	3359.35	3070.42	3067.99
ENSMUSG00000045954	Sdpr	TRUE	-0.621786	0.245401	-2.53376	0.0112847	0.161593	1665.16	3279.41	2369.36	1935	1558.83	1260.87
ENSMUSG00000042594	Sh2b3	TRUE	-0.286561	0.113129	-2.53305	0.0113075	0.161763	1319.76	1285.52	1104.3	1052.23	967.881	1022.33
ENSMUSG00000001497	Pax9	TRUE	1.70205	0.672144	2.53227	0.0113326	0.161965	7.21742	26.5852	5.02409	27.4793	51.0933	49.1118
ENSMUSG00000042743	Sgtb	TRUE	0.433484	0.1713	2.53056	0.0113881	0.162601	177.342	151.793	160.771	233.574	207.265	220.502
ENSMUSG00000032186	Tmod2	TRUE	0.60519	0.239199	2.53006	0.0114042	0.162616	93.8265	142.36	110.53	193.5	150.388	185.422
ENSMUSG00000030309	Caprin2	TRUE	0.456018	0.180263	2.52974	0.0114147	0.162616	147.442	181.809	188.906	223.27	234.258	253.578
ENSMUSG00000033849	B3galt2	TRUE	-1.44993	0.573208	-2.52951	0.0114223	0.162616	38.1492	55.7432	21.1012	14.8846	19.2805	8.01826
ENSMUSG00000031983	2310022B05Rik	TRUE	0.217939	0.086204	2.52818	0.0114656	0.162732	7365.89	6727.77	7036.74	8764.77	7806.67	8005.23
ENSMUSG00000031659	Adcy7	TRUE	-0.35754	0.141433	-2.52798	0.0114721	0.162732	1458.95	1652.57	1319.33	1324.73	1079.71	1056.41
ENSMUSG00000074994	Qser1	TRUE	0.223795	0.0885276	2.52797	0.0114725	0.162732	1882.72	1859.25	1809.68	2169.72	2287.63	2025.61
ENSMUSG00000028228	Cpne3	TRUE	-0.253132	0.100135	-2.5279	0.0114746	0.162732	1708.47	1742.62	1958.39	1454.12	1498.09	1585.61
ENSMUSG00000021226	Acot2	TRUE	0.560556	0.22187	2.52651	0.0115203	0.163222	247.454	250.416	294.412	511.803	345.121	312.712
ENSMUSG00000000325	Arvcf	TRUE	-0.510873	0.202305	-2.52526	0.0115611	0.163642	320.66	320.738	458.197	283.953	259.323	228.52
ENSMUSG00000022894	Adamts5	TRUE	0.561178	0.222255	2.52493	0.0115721	0.163642	2752.93	3487.81	2532.14	3254.01	5886.34	3803.66
ENSMUSG00000029553	Tfec	TRUE	-0.74869	0.296804	-2.5225	0.0116523	0.164618	102.075	102.911	76.3662	53.8137	68.4458	45.1027
ENSMUSG00000073492	Gm10521	TRUE	-0.76669	0.303982	-2.52215	0.0116639	0.164624	97.9507	111.486	88.424	77.8581	53.9854	44.1004
ENSMUSG00000047414	Flrt2	TRUE	-0.586626	0.232812	-2.51975	0.011744	0.165595	1298.1	1329.26	1056.06	1123.22	753.867	577.315
ENSMUSG00000021846	Peli2	TRUE	0.303943	0.120689	2.51839	0.0117893	0.165964	1485.76	1688.59	1385.64	1986.53	1700.54	1945.43
ENSMUSG00000017639	Rab11fip4	TRUE	-2.66096	1.05668	-2.51822	0.0117949	0.165964	8.24848	5.14553	52.2506	3.43492	1.92805	5.01141
ENSMUSG00000054469	Lclat1	TRUE	0.227582	0.0903838	2.51795	0.0118039	0.165964	1960.05	1793.22	1731.3	2130.79	2198.94	2090.76
ENSMUSG00000063558	Aox1	TRUE	-0.588377	0.233747	-2.51716	0.0118306	0.166181	344.374	414.215	292.402	302.273	188.949	209.477
ENSMUSG00000039230	Tbcd	TRUE	0.206863	0.0822446	2.51522	0.0118958	0.166841	1767.24	1648.28	1690.1	1977.37	1903.95	2010.58
ENSMUSG00000057191	AB124611	TRUE	-0.568262	0.225941	-2.51509	0.0119003	0.166841	202.088	197.245	179.863	104.193	122.431	163.372
ENSMUSG00000028656	Cap1	TRUE	-0.156037	0.0620656	-2.51406	0.011935	0.167169	15173.1	15522.3	14873.3	13861	13517.6	13520.8
ENSMUSG00000018507	Trpv2	TRUE	-0.384298	0.153088	-2.51031	0.0120624	0.168794	1644.54	1812.08	1877	1136.96	1639.81	1307.98
ENSMUSG00000047904	Sstr2	TRUE	-1.78482	0.711443	-2.50873	0.0121166	0.16934	19.5901	22.2973	88.424	18.3196	10.6043	9.02054
ENSMUSG00000037922	Bank1	TRUE	-0.810752	0.323202	-2.5085	0.0121245	0.16934	102.075	101.195	62.2987	59.5386	47.2372	45.1027
ENSMUSG00000025938	Slco5a1	TRUE	1.33806	0.533557	2.5078	0.0121485	0.169515	56.7083	33.4459	28.1349	182.051	50.1293	67.1529
ENSMUSG00000017781	Pitpna	TRUE	-0.203381	0.0811582	-2.50598	0.0122114	0.170232	5845.08	5985.96	5324.53	5034.44	4962.8	4904.17
ENSMUSG00000093337	Mir5109	FALSE	0.829792	0.331181	2.50555	0.012226	0.170274	60.8325	53.1704	84.4048	97.3227	160.028	94.2146
ENSMUSG00000007379	Dennd2c	TRUE	-0.427382	0.170601	-2.50515	0.0122398	0.170306	305.194	341.32	331.59	271.359	254.503	202.461
ENSMUSG00000037759	Ptger2	TRUE	1.07052	0.427403	2.5047	0.0122557	0.170365	19.5901	15.4366	21.1012	29.7693	46.2732	41.0936
ENSMUSG00000021193	Pitrm1	TRUE	0.187103	0.074728	2.50379	0.012287	0.170585	2654.98	2491.29	2529.13	2942.58	2863.15	2931.68
ENSMUSG00000002778	Kdelr1	TRUE	0.205903	0.0822436	2.50357	0.0122947	0.170585	5333.67	4876.24	4696.52	5708.83	5733.06	5750.1
ENSMUSG00000034959	5031414D18Rik	TRUE	-0.820617	0.327937	-2.50236	0.0123367	0.170943	86.609	83.186	78.3758	44.6539	32.7768	63.1438
ENSMUSG00000026893	Gca	TRUE	0.695503	0.27796	2.50216	0.0123436	0.170943	62.8947	54.028	51.2457	84.728	79.05	108.247
ENSMUSG00000045165	AI467606	TRUE	-0.702192	0.280912	-2.49969	0.0124302	0.171981	126.82	90.9043	104.501	59.5386	56.8775	81.1849
ENSMUSG00000028583	Pdpn	TRUE	-0.773196	0.309427	-2.4988	0.0124615	0.172251	864.028	1404.73	1486.13	727.058	1045	424.968
ENSMUSG00000040907	Atp1a3	TRUE	-0.730111	0.29225	-2.49824	0.0124811	0.172302	116.51	150.078	111.535	54.9587	97.3665	75.1712
ENSMUSG00000018398	Sept8	TRUE	0.264035	0.105699	2.49799	0.0124901	0.172302	6037.89	4936.27	5755.6	6773.66	6357.74	6955.84
ENSMUSG00000037884	1700017G19Rik	FALSE	-1.88558	0.754926	-2.4977	0.0125002	0.172302	12.3727	20.5821	13.0626	5.72486	2.89207	4.00913
ENSMUSG00000030557	Mef2a	TRUE	-0.248515	0.0995881	-2.49543	0.0125805	0.173247	6635.9	6017.69	5984.7	5495.87	5456.38	4736.79
ENSMUSG00000021038	Vipas39	TRUE	-0.284201	0.113904	-2.49509	0.0125925	0.173249	849.594	908.185	1016.88	755.682	778.932	743.694
ENSMUSG00000031253	Srpx2	TRUE	0.264339	0.105977	2.49432	0.01262	0.173466	4893.41	4221.05	4631.21	5018.42	5954.78	5532.6
ENSMUSG00000030607	Acan	TRUE	6.36571	2.55334	2.49309	0.0126636	0.173828	2.06212	0	0	4.57989	0.964025	161.368
ENSMUSG00000035504	Reep6	TRUE	0.982737	0.394241	2.49273	0.0126764	0.173828	30.9318	34.3035	31.1494	41.219	88.6903	60.137
ENSMUSG00000017493	Igfbp4	TRUE	1.0244	0.411047	2.49217	0.0126967	0.173828	34135.3	29419.5	39840.1	32108.5	87865.1	90341.7
ENSMUSG00000032849	Abcc4	TRUE	-0.269771	0.108251	-2.49209	0.0126996	0.173828	828.972	872.167	908.356	775.146	689.278	701.598
ENSMUSG00000046157	Tmem229b	TRUE	-0.56549	0.226929	-2.49192	0.0127053	0.173828	187.653	146.647	214.026	136.252	109.899	124.283
ENSMUSG00000039616	Mocos	TRUE	-0.51375	0.206227	-2.49119	0.0127315	0.174025	171.156	144.932	163.785	124.802	99.2946	112.256
ENSMUSG00000057751	Megf6	TRUE	-1.22588	0.49219	-2.49067	0.0127502	0.174118	1450.7	1722.89	3651.51	1226.27	705.666	986.246
ENSMUSG00000021583	Erap1	TRUE	-0.395279	0.158786	-2.48938	0.0127967	0.174592	983.631	1306.96	1248.99	763.697	965.953	961.189
ENSMUSG00000060487	Samd5	TRUE	-1.27689	0.513043	-2.48884	0.0128159	0.174643	63.9257	29.158	70.3373	21.7545	13.4963	32.073
ENSMUSG00000026568	Mpc2	TRUE	0.60043	0.241271	2.48861	0.0128243	0.174643	596.984	338.747	319.532	627.445	620.832	653.488
ENSMUSG00000042106	Fam212a	TRUE	0.64449	0.259035	2.48804	0.0128449	0.174643	68.05	64.3191	73.3518	87.0179	125.323	108.247
ENSMUSG00000070436	Serpinh1	TRUE	0.187548	0.0753822	2.48796	0.0128479	0.174643	58336.3	58497.8	61565.2	66999.2	64678.4	71487.8
ENSMUSG00000040612	Ildr2	TRUE	0.823478	0.331157	2.48667	0.0128945	0.175116	227.864	111.486	297.426	454.554	311.38	359.819
ENSMUSG00000033174	Mgll	TRUE	-1.49207	0.600446	-2.48494	0.0129573	0.175807	476.35	551.429	1355.5	420.205	167.74	259.591
ENSMUSG00000054136	Adm2	TRUE	0.727778	0.292952	2.48429	0.0129809	0.175965	90.7333	78.8981	77.371	183.196	98.3305	128.292
ENSMUSG00000021143	Pacs2	TRUE	-0.486685	0.195954	-2.48367	0.0130036	0.176082	1939.42	1804.36	2706.98	1854.86	1280.22	1469.35
ENSMUSG00000018102	Hist1h2bc	TRUE	0.629486	0.253478	2.4834	0.0130135	0.176082	1032.09	836.148	465.231	1142.68	1301.43	1165.65
ENSMUSG00000038765	Lmx1b	TRUE	-3.02023	1.21705	-2.4816	0.0130794	0.17667	3.09318	30.0156	24.1156	0	0.964025	6.0137
ENSMUSG00000047735	Samd9l	TRUE	-0.231681	0.0933612	-2.48156	0.0130809	0.17667	2147.7	2300.91	2192.51	1744.94	1915.52	1994.54
ENSMUSG00000026888	Grb14	TRUE	-0.467693	0.188762	-2.47769	0.0132236	0.178434	1251.71	1409.87	2058.87	1178.18	1081.64	1153.63
ENSMUSG00000058407	Txndc9	TRUE	-0.225735	0.0911363	-2.4769	0.0132529	0.178666	1483.7	1402.16	1453.97	1297.25	1241.66	1172.67
ENSMUSG00000025026	Add3	TRUE	0.272046	0.109878	2.47589	0.0132903	0.179006	1437.3	1232.35	1241.96	1494.19	1552.08	1674.81
ENSMUSG00000052632	Asap2	TRUE	0.349564	0.141237	2.47502	0.0133229	0.179282	385.616	429.651	350.682	456.844	505.149	524.194
ENSMUSG00000037710	Cisd1	TRUE	0.47709	0.192799	2.47455	0.0133403	0.179352	429.952	293.295	293.407	514.093	451.164	449.023
ENSMUSG00000075324	Fign	TRUE	-0.809367	0.327133	-2.47412	0.0133564	0.179404	87.6401	110.629	62.2987	43.509	49.1653	56.1278
ENSMUSG00000030638	Sh3gl3	TRUE	-0.906688	0.36692	-2.47108	0.0134705	0.180633	55.6772	96.0498	84.4048	48.0889	49.1653	29.0662
ENSMUSG00000024925	Rnaseh2c	TRUE	0.643818	0.260546	2.47103	0.0134724	0.180633	320.66	184.381	183.882	302.273	415.495	356.813
ENSMUSG00000058883	Zfp708	TRUE	0.850402	0.344296	2.46998	0.0135122	0.180992	42.2735	25.7276	41.1976	74.4232	63.6256	58.1324
ENSMUSG00000029096	Htra3	TRUE	-0.407791	0.165124	-2.4696	0.0135264	0.180992	2584.87	2782.87	2929.05	2431.92	1589.68	2234.09
ENSMUSG00000022438	Parvb	TRUE	-0.389443	0.157711	-2.46935	0.013536	0.180992	1590.93	1908.13	1509.24	1102.61	1511.59	1208.75
ENSMUSG00000029098	Acox3	TRUE	-0.275921	0.111814	-2.46769	0.013599	0.181669	907.333	1035.97	1042	803.771	791.464	870.984
ENSMUSG00000025140	Pycr1	TRUE	0.487656	0.197794	2.46547	0.0136835	0.182633	782.575	627.754	1033.96	1300.69	1010.3	1115.54
ENSMUSG00000027203	Dut	TRUE	0.452984	0.183829	2.46415	0.0137337	0.183137	384.585	297.583	280.344	376.696	483.94	455.036
ENSMUSG00000027030	Stk39	TRUE	0.239802	0.0973309	2.46378	0.0137479	0.183161	1037.25	980.223	1029.94	1280.08	1170.33	1148.62
ENSMUSG00000052534	Pbx1	TRUE	0.50338	0.204385	2.4629	0.0137818	0.183446	4771.75	4012.65	2950.15	5620.67	6641.17	4371.96
ENSMUSG00000072812	Ahnak2	TRUE	-1.13537	0.461189	-2.46184	0.0138228	0.183663	1720.84	2451.84	2603.48	1610.98	581.307	893.034
ENSMUSG00000031511	Arhgef7	TRUE	-0.195816	0.0795407	-2.46183	0.013823	0.183663	1947.67	2041.06	1905.14	1719.75	1703.43	1723.93
ENSMUSG00000070867	Trabd2b	TRUE	0.538762	0.218966	2.46048	0.0138753	0.184192	1002.19	686.928	1198.75	1126.65	1594.5	1471.35
ENSMUSG00000039982	Dtx4	TRUE	-0.554466	0.22543	-2.45959	0.0139095	0.18448	272.2	296.725	371.783	271.359	192.805	177.404
ENSMUSG00000041308	Sntb2	TRUE	-0.257729	0.104838	-2.45835	0.0139576	0.18495	1299.14	1420.17	1221.86	1151.84	1089.35	1057.41
ENSMUSG00000049097	Ankrd34a	TRUE	0.833622	0.339412	2.45608	0.0140463	0.185959	35.056	36.8763	27.1301	60.6835	49.1653	67.1529
ENSMUSG00000025701	Alox5	TRUE	-0.624673	0.254545	-2.45408	0.0141247	0.186524	170.125	168.945	174.838	75.5682	123.395	133.304
ENSMUSG00000049744	Arhgap15	TRUE	-0.576561	0.234955	-2.45392	0.0141308	0.186524	156.721	134.641	140.675	88.1629	82.9061	118.269
ENSMUSG00000030978	Rrm1	TRUE	-0.239337	0.0975327	-2.45392	0.0141309	0.186524	4017.01	4539.21	4470.44	3485.3	3587.14	3963.03
ENSMUSG00000020121	Srgap1	TRUE	0.302179	0.123153	2.4537	0.0141397	0.186524	550.586	595.166	567.722	737.362	747.119	629.433
ENSMUSG00000021213	Akr1c13	TRUE	-0.846841	0.345456	-2.45137	0.0142312	0.187565	77.3295	85.7588	51.2457	35.4942	36.6329	47.1073
ENSMUSG00000023088	Abcc1	TRUE	-0.212067	0.0865782	-2.44943	0.0143082	0.18841	5753.32	6483.36	5663.16	5148.94	5160.42	5145.72
ENSMUSG00000006342	Susd2	TRUE	-0.86992	0.355239	-2.44883	0.014332	0.188555	429.952	414.215	1052.05	405.32	254.503	377.861
ENSMUSG00000029754	Dlx6	TRUE	0.624331	0.255062	2.44777	0.0143744	0.188945	224.771	204.963	352.691	482.033	321.02	402.918
ENSMUSG00000088185	Scarna2	FALSE	1.48868	0.608697	2.44567	0.0144581	0.189661	16.497	12.0062	11.053	65.2634	26.9927	19.0434
ENSMUSG00000027630	Tbl1xr1	TRUE	-0.26138	0.106876	-2.44564	0.0144594	0.189661	3479.83	3417.49	3428.44	3220.81	2813.02	2582.88
ENSMUSG00000034640	Tiparp	TRUE	-0.415159	0.169768	-2.44544	0.0144675	0.189661	1779.61	1585.68	1145.49	1127.8	1084.53	1170.67
ENSMUSG00000071714	Csf2rb2	TRUE	-0.774012	0.316597	-2.44479	0.0144937	0.189835	561.928	541.995	259.243	352.652	216.906	228.52
ENSMUSG00000022773	Ypel1	TRUE	-0.807992	0.331144	-2.44	0.0146871	0.192198	81.4537	66.8918	65.3132	35.4942	53.0214	33.0753
ENSMUSG00000025813	Homer2	TRUE	2.21337	0.907256	2.43964	0.0147021	0.192223	5.1553	3.43035	19.0916	16.0296	95.4385	16.0365
ENSMUSG00000037664	Cdkn1c	TRUE	1.79963	0.738292	2.43756	0.0147866	0.193156	223.74	114.059	81.3903	396.161	878.227	184.42
ENSMUSG00000024589	Nedd4l	TRUE	-0.295424	0.121298	-2.43554	0.0148698	0.194071	720.711	778.69	843.043	599.966	685.422	622.418
ENSMUSG00000050212	Eva1b	TRUE	0.59257	0.24334	2.43515	0.0148857	0.194107	401.082	294.153	200.964	454.554	469.48	426.972
ENSMUSG00000034285	Nipsnap1	TRUE	0.736528	0.30255	2.4344	0.0149164	0.194335	110.323	78.8981	91.4385	124.802	125.323	216.493
ENSMUSG00000041560	Gltscr2	TRUE	0.386994	0.15905	2.43316	0.0149677	0.194696	1796.11	1461.33	1174.63	1946.45	1919.37	1929.39
ENSMUSG00000056069	Fam105a	TRUE	-0.362928	0.149176	-2.43289	0.0149788	0.194696	635.133	576.299	771.701	495.773	540.818	504.148
ENSMUSG00000036106	Prr5	TRUE	0.48794	0.200569	2.43277	0.0149837	0.194696	266.014	258.991	181.872	303.418	370.186	317.724
ENSMUSG00000078945	Naip2	TRUE	-0.593661	0.244079	-2.43225	0.0150054	0.194806	131.976	184.381	164.79	84.728	119.539	114.26
ENSMUSG00000015437	Gzmb	TRUE	-2.03081	0.83516	-2.43164	0.0150307	0.194962	13.4038	17.1518	12.0578	5.72486	3.8561	1.00228
ENSMUSG00000042357	Gjb5	TRUE	-0.893876	0.368033	-2.42879	0.0151491	0.196282	273.231	312.162	377.812	92.7428	284.387	140.32
ENSMUSG00000033882	Rbm46	TRUE	-1.4255	0.586973	-2.42856	0.015159	0.196282	34.025	62.6039	52.2506	11.4497	34.7049	9.02054
ENSMUSG00000039740	Alg2	TRUE	0.243087	0.100153	2.42715	0.015218	0.196763	1148.6	1096	1086.21	1383.13	1349.63	1209.76
ENSMUSG00000028322	Exosc3	TRUE	0.441852	0.182066	2.42688	0.0152292	0.196763	303.132	236.694	210.007	326.317	336.445	354.808
ENSMUSG00000074829	2010315B03Rik	TRUE	0.502361	0.207013	2.42671	0.0152363	0.196763	98.9818	107.198	115.554	133.962	164.848	156.356
ENSMUSG00000026976	Pax8	TRUE	-1.32211	0.545706	-2.42275	0.0154037	0.198581	30.9318	28.3004	42.2024	5.72486	16.3884	18.0411
ENSMUSG00000029455	Aldh2	TRUE	-0.293464	0.121129	-2.42274	0.015404	0.198581	6914.29	7257.76	7739.11	5674.48	6875.42	5327.13
ENSMUSG00000035711	Dok3	TRUE	-0.528507	0.218177	-2.42237	0.0154195	0.198607	152.597	156.081	126.607	88.1629	106.043	107.244
ENSMUSG00000026315	Serpinb8	TRUE	-0.597678	0.246776	-2.42194	0.0154378	0.198669	141.255	125.208	143.689	91.5978	108.935	70.1598
ENSMUSG00000024677	Ms4a6b	TRUE	-0.746592	0.308356	-2.4212	0.0154692	0.1989	152.597	134.641	215.031	107.627	124.359	67.1529
ENSMUSG00000024371	C2	TRUE	-1.22641	0.506693	-2.42042	0.0155024	0.199152	59.8015	41.1642	146.704	32.0592	41.4531	32.073
ENSMUSG00000042812	Foxf1	TRUE	-4.22773	1.74723	-2.41967	0.0155346	0.199392	3.09318	14.579	3.01446	1.14497	0	0
ENSMUSG00000024521	Pmaip1	TRUE	-0.322795	0.133551	-2.41701	0.0156486	0.20068	655.754	693.788	660.166	609.125	522.501	477.087
ENSMUSG00000097183	AC136729.1	FALSE	-0.937937	0.388185	-2.41621	0.0156828	0.200945	98.9818	162.084	72.3469	54.9587	76.158	43.0982
ENSMUSG00000064080	Fbln2	TRUE	0.475251	0.196801	2.41489	0.0157401	0.201503	20032.5	28568	24314.6	24631.8	39679.3	37052.4
ENSMUSG00000051817	Sox12	TRUE	0.322952	0.133801	2.41368	0.0157923	0.201997	316.535	290.722	326.566	380.131	377.898	408.931
ENSMUSG00000027035	Cers6	TRUE	0.311248	0.128977	2.41321	0.0158127	0.202082	3117.93	3356.6	3036.56	3299.81	4094.21	4406.03
ENSMUSG00000005580	Adcy9	TRUE	-0.42343	0.175488	-2.41287	0.0158273	0.202093	377.368	332.744	318.527	297.693	251.61	218.498
ENSMUSG00000042367	Gjb3	TRUE	-1.27863	0.5308	-2.40887	0.0160019	0.204146	46.3977	106.341	34.1638	17.1746	32.7768	27.0616
ENSMUSG00000031529	Tnks	TRUE	0.270716	0.112495	2.40647	0.0161074	0.205313	3645.83	3257.12	2942.11	4250.14	3803.08	3824.71
ENSMUSG00000024818	Slc25a45	TRUE	-0.369392	0.153544	-2.40577	0.0161384	0.205413	366.026	340.462	331.59	235.864	270.891	295.673
ENSMUSG00000033192	Lpcat2	TRUE	-0.419503	0.174389	-2.40556	0.0161477	0.205413	475.319	427.079	465.231	383.566	269.927	369.842
ENSMUSG00000004317	Clcn5	TRUE	0.332378	0.138202	2.40502	0.0161717	0.205413	1529.06	1453.61	1205.78	1701.43	1977.21	1594.63
ENSMUSG00000032334	Loxl1	TRUE	0.415696	0.172848	2.40498	0.0161733	0.205413	4235.59	3808.55	3829.36	4011.98	5288.64	6535.88
ENSMUSG00000010721	Lmbr1	TRUE	0.308077	0.12812	2.40461	0.0161899	0.205413	483.567	425.363	483.318	536.992	616.976	567.292
ENSMUSG00000003072	Atp5d	TRUE	0.449954	0.187137	2.4044	0.0161988	0.205413	2654.98	1683.44	1697.14	2597.94	2683.85	2960.74
ENSMUSG00000016206	H2-M3	TRUE	-0.605754	0.252273	-2.40119	0.016342	0.206825	209.305	227.261	276.325	115.642	203.409	148.338
ENSMUSG00000019132	BC005537	TRUE	-0.283349	0.118014	-2.40099	0.0163508	0.206825	10721	9546.67	9183.04	9102.53	7815.35	7282.59
ENSMUSG00000037999	Arap2	TRUE	-0.627904	0.261525	-2.40093	0.0163533	0.206825	681.531	541.138	500.4	293.113	532.142	288.657
ENSMUSG00000029254	Stap1	TRUE	-0.668435	0.27844	-2.40064	0.0163664	0.206825	211.367	198.96	114.549	104.193	111.827	114.26
ENSMUSG00000004846	Plod3	TRUE	0.325125	0.135479	2.39981	0.0164036	0.206964	7154.53	7771.46	7973.24	7880.85	10951.3	9853.44
ENSMUSG00000024165	Hn1l	TRUE	0.282911	0.117891	2.39977	0.0164054	0.206964	1834.26	1824.95	1668	1878.9	2265.46	2335.32
ENSMUSG00000027351	Spred1	TRUE	-0.22124	0.0922986	-2.39701	0.0165297	0.208327	3859.26	4350.54	4352.87	3474.99	3788.62	3513
ENSMUSG00000056380	Gpr50	TRUE	5.03651	2.10158	2.39653	0.0165512	0.208327	0	0	1.00482	0	31.8128	2.00457
ENSMUSG00000052302	Tbc1d30	TRUE	-1.37391	0.573335	-2.39635	0.0165595	0.208327	27.8386	24.0125	31.1494	9.15978	5.78415	17.0388
ENSMUSG00000022295	Atp6v1c1	TRUE	-0.209924	0.0876104	-2.39611	0.01657	0.208327	1702.28	1689.45	1691.11	1465.56	1544.37	1384.15
ENSMUSG00000039176	Polg	TRUE	0.285206	0.119048	2.39571	0.0165881	0.208377	1596.08	1426.17	1298.23	1643.04	1897.2	1722.92
ENSMUSG00000024899	Papss2	TRUE	0.283614	0.118425	2.39488	0.0166257	0.208671	1330.07	1234.93	1380.62	1422.06	1769.95	1607.66
ENSMUSG00000002249	Tead3	TRUE	0.309866	0.129439	2.39392	0.0166695	0.209042	818.662	806.99	706.387	1053.37	856.054	983.239
ENSMUSG00000031189	Aff2	TRUE	0.814909	0.340478	2.39342	0.0166919	0.209146	75.2674	74.6101	49.2361	84.728	161.956	103.235
ENSMUSG00000049804	Armcx4	TRUE	0.351163	0.146796	2.39219	0.0167482	0.209524	1965.2	1875.54	1485.12	2538.4	2245.21	2011.58
ENSMUSG00000020814	Mxra7	TRUE	0.290017	0.121238	2.39214	0.0167505	0.209524	790.823	763.253	783.758	854.15	936.068	1066.43
ENSMUSG00000079419	Ms4a6c	TRUE	-0.682832	0.285537	-2.3914	0.0167843	0.209768	287.666	216.97	444.13	178.616	236.186	175.399
ENSMUSG00000051499	Zfp786	TRUE	1.20877	0.505538	2.39105	0.0168001	0.209788	11.3417	9.43346	13.0626	21.7545	27.9567	28.0639
ENSMUSG00000026944	Abca2	TRUE	-0.283725	0.118702	-2.39023	0.0168378	0.209953	515.53	533.419	573.751	464.859	434.775	433.988
ENSMUSG00000019878	Hsf2	TRUE	-0.300716	0.125815	-2.39014	0.0168419	0.209953	450.573	471.673	507.433	393.871	400.07	366.835
ENSMUSG00000000142	Axin2	TRUE	-0.986491	0.413068	-2.38821	0.0169309	0.210885	96.9196	112.344	249.195	89.3079	53.0214	89.2032
ENSMUSG00000018999	Slc35b4	TRUE	0.208912	0.087545	2.38633	0.0170173	0.211782	2003.35	1940.72	1818.72	2150.26	2319.44	2189.99
ENSMUSG00000039831	Arhgap29	TRUE	0.491517	0.206016	2.38583	0.0170408	0.211896	4595.43	3764.81	5028.11	4338.3	7071.12	7410.88
ENSMUSG00000069565	Dazap1	TRUE	0.293957	0.123246	2.38512	0.0170734	0.21202	2152.85	1854.96	1632.83	2368.95	2276.06	2270.17
ENSMUSG00000007908	Hmgcll1	TRUE	0.728301	0.305369	2.38499	0.0170796	0.21202	305.194	282.146	437.096	318.302	704.702	672.532
ENSMUSG00000034687	Fras1	TRUE	0.632882	0.265421	2.38444	0.0171049	0.212156	94.8575	138.072	186.896	208.385	209.193	233.532
ENSMUSG00000002274	Metrn	TRUE	0.472869	0.198344	2.38408	0.0171219	0.212187	148.473	131.211	120.578	161.441	197.625	195.445
ENSMUSG00000031391	L1cam	TRUE	-0.517755	0.217228	-2.38347	0.0171505	0.212363	305.194	259.849	217.041	169.456	218.834	157.358
ENSMUSG00000031266	Gla	TRUE	-0.322405	0.135308	-2.38274	0.0171841	0.212601	653.692	622.609	555.665	470.584	539.854	454.034
ENSMUSG00000046718	Bst2	TRUE	-0.505708	0.21227	-2.38238	0.0172012	0.212634	699.059	622.609	734.522	388.146	412.603	646.472
ENSMUSG00000024986	Hhex	TRUE	-0.590301	0.24783	-2.38188	0.0172246	0.212745	136.1	106.341	102.491	84.728	71.3378	73.1666
ENSMUSG00000034165	Ccnd3	TRUE	0.304874	0.128051	2.38087	0.0172716	0.213133	1288.83	1206.63	1217.84	1744.94	1518.34	1325.02
ENSMUSG00000052572	Dlg2	TRUE	-1.04227	0.437847	-2.38043	0.0172923	0.213133	31.9629	68.607	81.3903	27.4793	30.8488	30.0685
ENSMUSG00000006800	Sulf2	TRUE	-0.458662	0.192711	-2.38005	0.0173105	0.213133	3812.86	3813.69	5678.23	2607.1	3547.61	3525.03
ENSMUSG00000047181	Samd14	TRUE	0.365008	0.153386	2.37967	0.017328	0.213133	656.785	675.779	559.684	804.916	698.918	934.127
ENSMUSG00000031109	Enox2	TRUE	-0.287676	0.120889	-2.37967	0.0173284	0.213133	434.076	433.082	427.048	341.202	353.797	364.831
ENSMUSG00000028059	Arhgef2	TRUE	0.324721	0.136485	2.37917	0.0173514	0.213239	3303.52	3371.18	3932.86	5179.86	3979.49	4127.4
ENSMUSG00000026678	Rgs5	TRUE	1.10493	0.464519	2.37866	0.0173758	0.213358	179.404	158.654	73.3518	133.962	253.539	497.132
ENSMUSG00000038481	Cdk19	TRUE	-0.230904	0.0970856	-2.37836	0.0173901	0.213358	966.103	885.03	911.37	793.466	775.076	784.787
ENSMUSG00000035357	Pdzrn3	TRUE	0.531881	0.223676	2.37791	0.0174112	0.213439	412.424	388.487	456.188	567.906	444.415	804.833
ENSMUSG00000038301	Snx10	TRUE	-0.24956	0.105083	-2.37488	0.0175547	0.214883	1344.5	1323.26	1412.77	1148.41	1236.84	1046.38
ENSMUSG00000042233	2010015L04Rik	TRUE	0.706501	0.297512	2.37469	0.0175635	0.214883	39.1803	52.3128	39.1879	75.5682	67.4817	71.1621
ENSMUSG00000028961	Pgd	TRUE	-0.208674	0.0878814	-2.3745	0.0175728	0.214883	6397.73	6941.31	6303.23	5347.02	6006.84	5642.85
ENSMUSG00000025268	Maged2	TRUE	0.294761	0.124224	2.37282	0.0176529	0.215684	5813.12	5883.91	5014.04	5955	7607.12	6935.8
ENSMUSG00000070348	Ccnd1	TRUE	-0.406239	0.171275	-2.37185	0.0176992	0.216072	28112.9	28662.3	31474.9	24218.5	26046	16328.2
ENSMUSG00000022742	Cpox	TRUE	0.311238	0.131267	2.37102	0.0177389	0.216376	1083.64	905.613	1128.41	1284.66	1402.66	1178.68
ENSMUSG00000036528	Ppfibp2	TRUE	-0.408689	0.17239	-2.37072	0.0177536	0.216376	514.499	382.484	547.626	362.956	367.293	356.813
ENSMUSG00000042190	Cmklr1	TRUE	-0.447859	0.18896	-2.37013	0.0177817	0.216431	172.187	166.372	194.935	127.092	123.395	140.32
ENSMUSG00000038612	Mcl1	TRUE	-0.246433	0.103979	-2.37001	0.0177874	0.216431	6440	6127.46	6003.79	5314.96	5701.24	4638.56
ENSMUSG00000014158	Trpv4	TRUE	0.529558	0.223559	2.36876	0.0178476	0.216984	208.274	279.574	203.978	259.909	341.265	397.906
ENSMUSG00000030830	Itgal	TRUE	-0.449026	0.189647	-2.36769	0.0178995	0.217435	1468.23	1553.09	998.79	1057.95	1046.93	840.915
ENSMUSG00000014867	Surf4	TRUE	0.147091	0.0621338	2.36733	0.0179169	0.217468	12547	12607.4	12061.8	13681.3	13675.7	13854.6
ENSMUSG00000011463	Cpb1	TRUE	4.80833	2.0315	2.36688	0.0179388	0.217554	0	0	0	1.14497	9.64025	4.00913
ENSMUSG00000001493	Meox1	TRUE	1.66358	0.703377	2.36513	0.0180238	0.218243	6.18636	14.579	9.04337	35.4942	10.6043	49.1118
ENSMUSG00000027322	Siglec1	TRUE	-0.53549	0.226433	-2.3649	0.0180349	0.218243	1329.04	1542.8	1349.47	660.649	941.852	1308.98
ENSMUSG00000037278	Tmem97	TRUE	0.460468	0.194737	2.36456	0.0180515	0.218243	466.039	452.806	456.188	485.468	603.48	801.826
ENSMUSG00000032281	Acsbg1	TRUE	-1.01222	0.428151	-2.36416	0.0180709	0.218243	41.2424	42.0218	36.1735	14.8846	26.9927	17.0388
ENSMUSG00000020260	Pofut2	TRUE	0.163508	0.0691651	2.36403	0.0180774	0.218243	3828.33	3807.69	3768.07	4361.2	4125.06	4287.77
ENSMUSG00000004665	Cnn2	TRUE	-0.186807	0.0790363	-2.36356	0.0181003	0.218243	22708.1	24793.7	25495.3	21833.5	20775.7	21524
ENSMUSG00000020638	Cmpk2	TRUE	-1.04347	0.441489	-2.36353	0.0181016	0.218243	37.1182	41.1642	30.1446	17.1746	13.4963	22.0502
ENSMUSG00000036622	Atp13a2	TRUE	-0.283052	0.119771	-2.36328	0.0181141	0.218243	882.587	809.563	798.831	740.797	618.904	688.568
ENSMUSG00000020793	Galr2	TRUE	1.61954	0.685734	2.36177	0.0181881	0.218956	6.18636	8.57588	4.01927	20.6095	11.5683	26.0593
ENSMUSG00000004934	Pias4	TRUE	0.337097	0.14281	2.36046	0.0182524	0.21955	551.617	492.255	425.038	579.356	619.868	655.493
ENSMUSG00000023868	Pde10a	TRUE	-1.06001	0.449323	-2.35912	0.0183182	0.220162	80.4227	72.0374	96.4626	22.8995	27.9567	68.1552
ENSMUSG00000063268	Parp10	TRUE	-0.698782	0.296411	-2.35748	0.0183995	0.220958	343.343	477.676	531.549	177.471	259.323	395.902
ENSMUSG00000007950	Abhd8	TRUE	0.360268	0.153003	2.35464	0.0185406	0.222472	383.554	395.348	348.672	416.77	545.638	484.103
ENSMUSG00000031333	Abcb7	TRUE	-0.298422	0.126757	-2.35429	0.0185582	0.222502	660.91	573.726	553.655	490.048	496.473	467.064
ENSMUSG00000046768	Rhoj	TRUE	0.295303	0.125514	2.35276	0.0186346	0.222998	1629.07	1495.63	1329.37	1633.88	1983.96	1846.2
ENSMUSG00000017830	Dhx58	TRUE	-0.627015	0.266517	-2.35263	0.0186412	0.222998	120.634	122.635	147.708	65.2634	80.0141	107.244
ENSMUSG00000018819	Lsp1	TRUE	-0.448784	0.190764	-2.35256	0.0186449	0.222998	1518.75	1650.86	1499.19	1510.22	951.492	961.189
ENSMUSG00000027961	Lrrc39	TRUE	1.59434	0.678588	2.3495	0.0187989	0.224657	13.4038	11.1486	3.01446	42.364	19.2805	22.0502
ENSMUSG00000038508	Gdf15	TRUE	0.5431	0.231242	2.34862	0.0188433	0.225004	473.257	457.952	423.029	428.22	754.831	788.796
ENSMUSG00000045827	Serpinb9	TRUE	0.293318	0.124974	2.34704	0.0189234	0.225778	445.418	484.537	484.323	534.702	570.703	627.429
ENSMUSG00000070720	Tmem200b	TRUE	0.804481	0.342823	2.34663	0.0189439	0.225841	62.8947	54.8856	42.2024	127.092	84.8342	68.1552
ENSMUSG00000051331	Cacna1c	TRUE	-0.568516	0.242341	-2.34594	0.0189793	0.226079	1241.4	1436.46	1042	923.993	535.998	1049.39
ENSMUSG00000066595	Mfsd7b	TRUE	-0.378682	0.161586	-2.34353	0.0191024	0.227362	548.524	445.088	438.101	414.48	336.445	350.799
ENSMUSG00000068699	Flnc	TRUE	0.304678	0.130053	2.34272	0.0191438	0.22767	9140.35	10921.4	9036.33	12467.6	13148.3	10326.5
ENSMUSG00000030878	Cdr2	TRUE	0.234547	0.100147	2.34203	0.019179	0.227906	1600.21	1596.83	1492.16	1905.23	1934.8	1677.82
ENSMUSG00000017774	Myo1c	TRUE	0.183914	0.0785934	2.34007	0.0192799	0.228654	14854.5	15103.8	14328.7	15837.3	16701.7	17768.5
ENSMUSG00000059412	Fxyd2	TRUE	-1.34844	0.576274	-2.33992	0.0192876	0.228654	18.5591	19.7245	22.106	8.01481	8.67622	7.01598
ENSMUSG00000034940	Synrg	TRUE	-0.281864	0.12046	-2.33991	0.0192885	0.228654	821.755	898.752	940.51	672.099	719.162	796.815
ENSMUSG00000044206	Vsig4	TRUE	-1.74761	0.747439	-2.33813	0.0193806	0.229561	27.8386	10.2911	17.0819	3.43492	4.82012	8.01826
ENSMUSG00000045620	Odf3l1	TRUE	1.49731	0.641385	2.33449	0.0195701	0.231619	6.18636	6.00311	6.02891	14.8846	15.4244	21.0479
ENSMUSG00000006519	Cyba	TRUE	-0.259105	0.111121	-2.33173	0.019715	0.233089	1506.38	1445.89	1707.19	1337.33	1206.96	1349.07
ENSMUSG00000039410	Prdm16	TRUE	0.355252	0.152369	2.33152	0.0197259	0.233089	383.554	438.227	360.73	565.616	498.401	451.027
ENSMUSG00000031796	Gtl3	TRUE	0.333454	0.143091	2.33037	0.0197867	0.233619	494.909	398.778	387.86	549.587	535.034	529.205
ENSMUSG00000086841	2410006H16Rik	FALSE	0.414838	0.178039	2.33004	0.0198042	0.233639	1829.1	1631.13	2005.62	3059.37	2282.81	1945.43
ENSMUSG00000022108	Itm2b	TRUE	-0.199139	0.0855148	-2.3287	0.0198748	0.234284	14784.4	13437.5	14844.2	11778.3	13054.8	12676.9
ENSMUSG00000050382	Kif7	TRUE	0.377795	0.162367	2.3268	0.0199757	0.235285	361.902	392.775	371.783	414.48	473.336	575.31
ENSMUSG00000050541	Adra1b	TRUE	-0.691321	0.297159	-2.32643	0.0199954	0.235329	119.603	186.097	119.573	73.2782	79.05	111.253
ENSMUSG00000026077	Npas2	TRUE	-0.95562	0.411176	-2.32411	0.0201194	0.236599	112.386	123.493	281.349	120.222	63.6256	83.1895
ENSMUSG00000019194	Scn1b	TRUE	-0.284848	0.122723	-2.32108	0.0202828	0.238051	957.855	1028.25	1155.54	857.584	797.248	924.105
ENSMUSG00000000838	Fmr1	TRUE	0.236665	0.101979	2.32072	0.0203021	0.238051	2076.56	2318.06	2278.93	2719.31	2756.15	2389.44
ENSMUSG00000031355	Arhgap6	TRUE	-0.516363	0.222523	-2.32049	0.0203145	0.238051	162.907	229.833	222.065	149.991	158.1	122.278
ENSMUSG00000038578	Susd1	TRUE	-0.60814	0.262089	-2.32036	0.0203215	0.238051	81.4537	81.4708	81.3903	58.3936	53.0214	49.1118
ENSMUSG00000051351	Zfp46	TRUE	0.35798	0.15428	2.32032	0.0203236	0.238051	752.674	758.965	1017.88	990.401	1118.27	1131.58
ENSMUSG00000034247	Plekhm1	TRUE	-0.291298	0.125562	-2.31995	0.0203436	0.238096	882.587	936.486	1011.85	680.114	809.781	821.872
ENSMUSG00000036334	Igsf10	TRUE	0.595233	0.256636	2.31937	0.020375	0.238229	2202.34	2008.47	2062.89	4779.12	2234.61	2465.62
ENSMUSG00000036181	Hist1h1c	TRUE	0.451503	0.194685	2.31914	0.0203873	0.238229	2174.51	1821.52	2241.75	2208.65	2604.79	3714.46
ENSMUSG00000025402	Nab2	TRUE	0.268042	0.11567	2.3173	0.0204877	0.239212	2426.08	1959.59	2052.84	2751.37	2490.08	2510.72
ENSMUSG00000022946	Dopey2	TRUE	-0.229986	0.0992979	-2.31613	0.0205514	0.239642	1029	1069.41	1082.19	843.845	916.788	950.164
ENSMUSG00000062044	Lmtk3	TRUE	1.20234	0.519141	2.31602	0.020557	0.239642	23.7144	20.5821	9.04337	30.9143	34.7049	57.1301
ENSMUSG00000031662	Snx20	TRUE	-0.521872	0.225467	-2.31463	0.0206332	0.24034	121.665	121.777	110.53	72.1333	85.7982	88.2009
ENSMUSG00000029675	Eln	TRUE	1.73445	0.75006	2.31242	0.0207547	0.241565	7.21742	3.43035	5.02409	16.0296	9.64025	26.0593
ENSMUSG00000089669	Tnfsf13	TRUE	-1.42522	0.616497	-2.31181	0.0207882	0.241764	15.4659	18.8669	21.1012	6.86984	5.78415	8.01826
ENSMUSG00000073433	Arhgdig	TRUE	0.520018	0.225015	2.31104	0.0208309	0.241979	88.6712	116.632	132.636	170.601	152.316	162.37
ENSMUSG00000045689	Pcdhb4	TRUE	1.05035	0.454542	2.31079	0.0208445	0.241979	30.9318	25.7276	36.1735	48.0889	41.4531	102.233
ENSMUSG00000033581	Igf2bp2	TRUE	0.613401	0.265475	2.31058	0.020856	0.241979	1742.49	1304.39	866.154	2232.7	2346.44	1407.2
ENSMUSG00000073982	Rhog	TRUE	-0.228327	0.0988309	-2.31028	0.0208726	0.24198	1277.48	1433.89	1441.91	1143.83	1179	1222.78
ENSMUSG00000030062	Rpn1	TRUE	0.211551	0.0915914	2.30972	0.0209036	0.242149	6290.5	5853.04	5768.66	6485.12	6784.81	7469.01
ENSMUSG00000001870	Ltbp1	TRUE	-0.449233	0.194568	-2.30888	0.0209505	0.242502	8746.48	11843.3	13708.7	9360.15	9217.04	6544.91
ENSMUSG00000000982	Ccl3	TRUE	-1.12023	0.485332	-2.30817	0.0209897	0.242765	68.05	86.6163	52.2506	46.9439	35.6689	13.0297
ENSMUSG00000034401	Spata6	TRUE	0.259356	0.112421	2.30701	0.0210544	0.243211	1111.48	1034.25	1009.84	1276.64	1362.17	1137.59
ENSMUSG00000028521	Slc35d1	TRUE	-0.329675	0.142919	-2.30672	0.0210704	0.243211	543.369	573.726	463.221	447.684	423.207	387.883
ENSMUSG00000020589	Fam49a	TRUE	-0.456033	0.197709	-2.30659	0.0210777	0.243211	576.363	623.466	572.747	549.587	415.495	328.749
ENSMUSG00000021978	Extl3	TRUE	-0.241805	0.10485	-2.30619	0.0211	0.243278	4297.46	4403.71	4681.45	3370.8	3825.25	4119.38
ENSMUSG00000001768	Rin2	TRUE	-0.275294	0.119413	-2.30539	0.0211448	0.24358	1988.91	2077.93	2080.98	1465.56	1894.31	1717.91
ENSMUSG00000097430	AC020973.1	FALSE	1.29722	0.562822	2.30485	0.0211749	0.24358	10.3106	6.00311	16.0771	22.8995	29.8848	26.0593
ENSMUSG00000025227	Tmem180	TRUE	-0.853682	0.370387	-2.30483	0.0211758	0.24358	53.6151	56.6008	43.2072	30.9143	21.2085	33.0753
ENSMUSG00000034295	Fhod3	TRUE	-0.96159	0.417327	-2.30417	0.0212133	0.2436	469.132	221.258	647.103	365.246	170.632	151.345
ENSMUSG00000026829	Gbgt1	TRUE	-1.11389	0.483475	-2.30393	0.0212263	0.2436	45.3666	29.158	63.3036	25.1894	13.4963	25.0571
ENSMUSG00000058665	En1	TRUE	2.91837	1.26672	2.30388	0.0212294	0.2436	9.27954	1.71518	3.01446	1.14497	7.7122	96.2191
ENSMUSG00000076617	Ighm	TRUE	-1.59511	0.692436	-2.30363	0.0212437	0.2436	50.5219	11.1486	53.2554	9.15978	9.64025	19.0434
ENSMUSG00000006589	Aprt	TRUE	-0.186217	0.0808557	-2.30308	0.0212744	0.243762	2148.73	2264.03	2205.58	1857.15	1963.72	1995.54
ENSMUSG00000050592	Fam78a	TRUE	-0.664315	0.288551	-2.30225	0.0213211	0.244108	89.7022	65.1767	90.4337	48.0889	52.0573	54.1233
ENSMUSG00000020325	Fstl3	TRUE	0.289461	0.125757	2.30175	0.0213493	0.24424	1118.7	1264.94	1253.01	1598.38	1285.05	1563.56
ENSMUSG00000074483	Bglap	TRUE	0.600281	0.260982	2.30009	0.0214431	0.245124	196.932	111.486	166.8	269.069	193.769	256.584
ENSMUSG00000030494	Rhpn2	TRUE	1.62781	0.707874	2.29957	0.0214725	0.245269	7.21742	6.00311	3.01446	22.8995	13.4963	14.032
ENSMUSG00000021200	Asb2	TRUE	-1.22227	0.531652	-2.299	0.021505	0.245355	40.2113	86.6163	35.1686	21.7545	33.7409	14.032
ENSMUSG00000048450	Msx1	TRUE	0.695722	0.302639	2.29885	0.0215133	0.245355	58.7704	60.8887	82.3951	128.237	79.05	120.274
ENSMUSG00000033342	4833424O15Rik	TRUE	-1.40296	0.610487	-2.29811	0.0215557	0.245648	94.8575	19.7245	55.265	30.9143	17.3524	16.0365
ENSMUSG00000022454	Nell2	TRUE	-2.28847	0.996147	-2.29732	0.0216006	0.24597	261.889	240.982	1218.84	240.444	52.0573	60.137
ENSMUSG00000057457	Phex	TRUE	-0.57293	0.249477	-2.29653	0.0216459	0.246225	529.965	539.423	431.067	214.11	414.531	378.863
ENSMUSG00000032977	Fam207a	TRUE	0.303052	0.131978	2.29624	0.0216623	0.246225	556.772	553.144	620.978	626.3	766.4	740.687
ENSMUSG00000044250	Pced1b	TRUE	-0.951844	0.414557	-2.29605	0.0216732	0.246225	47.4288	68.607	70.3373	24.0444	24.1006	48.1096
ENSMUSG00000048621	Gm6377	TRUE	-0.74426	0.324222	-2.29553	0.021703	0.246374	59.8015	89.1891	70.3373	48.0889	48.2012	35.0799
ENSMUSG00000034652	Cd300a	TRUE	-0.529645	0.230949	-2.29334	0.0218286	0.247565	258.796	265.852	244.171	161.441	233.294	137.313
ENSMUSG00000022901	Cd86	TRUE	-0.758033	0.330569	-2.29311	0.0218415	0.247565	110.323	82.3284	66.318	64.1185	46.2732	43.0982
ENSMUSG00000025255	Zfhx4	TRUE	0.228317	0.0996242	2.29178	0.0219181	0.248243	5247.06	4932.84	4779.92	6103.85	5252.01	6170.05
ENSMUSG00000024220	Zfp523	TRUE	0.313284	0.13672	2.29143	0.0219387	0.248285	405.207	334.459	345.658	457.989	442.487	447.018
ENSMUSG00000049643	2310022A10Rik	TRUE	-0.348613	0.152267	-2.28949	0.0220508	0.249362	476.35	451.091	552.65	340.057	410.675	409.934
ENSMUSG00000021501	Caml	TRUE	0.286062	0.125168	2.28542	0.022288	0.25158	691.841	682.64	604.901	786.596	743.263	884.013
ENSMUSG00000033972	Zfp944	TRUE	0.350737	0.153468	2.28541	0.0222889	0.25158	212.398	226.403	228.094	304.563	259.323	287.655
ENSMUSG00000052698	Tln2	TRUE	-0.456904	0.199955	-2.28504	0.0223106	0.25158	3755.12	4355.69	4146.89	3975.34	2733.97	2223.06
ENSMUSG00000025178	Pi4k2a	TRUE	-0.25286	0.11067	-2.28481	0.0223238	0.25158	1575.46	1429.6	1324.35	1244.59	1256.12	1132.58
ENSMUSG00000029298	Gbp9	TRUE	-1.10202	0.482394	-2.28448	0.0223435	0.25158	49.4909	38.5914	50.2409	35.4942	16.3884	13.0297
ENSMUSG00000078942	Naip6	TRUE	-0.73544	0.322043	-2.28367	0.0223907	0.25158	119.603	89.1891	72.3469	70.9883	49.1653	49.1118
ENSMUSG00000020864	Ankrd40	TRUE	0.208597	0.0913441	2.28364	0.0223926	0.25158	1983.76	1922.71	2056.86	2382.69	2379.21	2128.85
ENSMUSG00000005054	Cstb	TRUE	-0.208826	0.0914517	-2.28346	0.0224032	0.25158	2347.72	2210.86	2131.22	1819.36	2023.49	1943.43
ENSMUSG00000038227	Hoxa9	TRUE	0.59114	0.258885	2.28341	0.0224062	0.25158	421.704	293.295	266.277	662.939	406.818	408.931
ENSMUSG00000061518	Cox5b	TRUE	0.878982	0.384975	2.28322	0.0224176	0.25158	485.629	194.672	139.67	493.483	528.286	485.105
ENSMUSG00000051627	Hist1h1e	TRUE	0.891002	0.390351	2.28257	0.0224559	0.251818	34.025	27.4428	24.1156	54.9587	37.597	66.1507
ENSMUSG00000004264	Phb2	TRUE	0.209202	0.0916644	2.28225	0.0224743	0.251832	2220.9	1952.73	2026.72	2366.66	2476.58	2322.29
ENSMUSG00000054520	Sh3bp2	TRUE	-0.311444	0.13651	-2.28147	0.0225207	0.25216	454.697	451.091	536.573	376.696	405.854	378.863
ENSMUSG00000056124	B4galt6	TRUE	-0.240142	0.105297	-2.28061	0.0225713	0.252472	2337.41	2422.68	2248.78	2087.29	2086.15	1762.01
ENSMUSG00000044030	Irf2bp1	TRUE	0.327902	0.14379	2.28042	0.0225828	0.252472	386.648	348.181	410.971	432.8	478.156	525.196
ENSMUSG00000024330	Col11a2	TRUE	0.952019	0.417566	2.27992	0.0226123	0.252609	84.5469	55.7432	101.487	251.894	88.6903	127.29
ENSMUSG00000049791	Fzd4	TRUE	0.998028	0.438201	2.27756	0.022753	0.253893	146.411	117.49	117.564	129.382	165.812	466.061
ENSMUSG00000026639	Lamb3	TRUE	-1.39439	0.61227	-2.27741	0.0227617	0.253893	14.4348	25.7276	32.1542	5.72486	10.6043	11.0251
ENSMUSG00000022629	Kif21a	TRUE	-0.48033	0.210974	-2.27672	0.0228028	0.25416	283.542	293.295	351.686	169.456	232.33	262.598
ENSMUSG00000045216	Hs6st1	TRUE	-0.243325	0.106982	-2.27444	0.0229395	0.255451	1201.18	1222.06	1147.5	1038.49	911.003	1068.43
ENSMUSG00000051379	Flrt3	TRUE	-0.986537	0.433793	-2.27421	0.0229533	0.255451	59.8015	33.4459	47.2265	27.4793	16.3884	27.0616
ENSMUSG00000003644	Rps6ka1	TRUE	-0.318706	0.140171	-2.27369	0.0229846	0.255606	649.568	593.451	583.8	461.424	444.415	558.271
ENSMUSG00000021763	BC067074	TRUE	0.524148	0.230702	2.27197	0.0230885	0.256409	120.634	152.651	142.684	248.459	187.021	164.374
ENSMUSG00000045980	Tmem104	TRUE	-0.242151	0.106584	-2.27192	0.0230916	0.256409	897.022	961.356	1045.01	831.25	801.105	822.874
ENSMUSG00000035199	Arl6ip5	TRUE	-0.20531	0.0903835	-2.27154	0.023114	0.256465	3390.13	3797.4	3892.67	3305.54	3148.5	3158.19
ENSMUSG00000070738	Dgkd	TRUE	-0.272323	0.120056	-2.2683	0.0233109	0.258455	1688.88	1655.14	1663.98	1551.44	1396.87	1199.73
ENSMUSG00000040687	Madd	TRUE	-0.360716	0.159052	-2.26792	0.0233341	0.258518	414.486	439.085	381.831	270.214	343.193	347.792
ENSMUSG00000044788	Fads6	TRUE	-1.11873	0.493496	-2.26695	0.0233935	0.258884	25.7765	24.87	32.1542	12.5947	15.4244	10.0228
ENSMUSG00000017390	Aldoc	TRUE	-0.827368	0.364994	-2.2668	0.0234024	0.258884	609.357	594.308	353.696	287.388	146.532	444.011
ENSMUSG00000021098	4930447C04Rik	TRUE	0.752061	0.331839	2.26634	0.0234305	0.259001	71.1431	54.028	106.511	166.021	117.611	106.242
ENSMUSG00000032966	Fkbp1a	TRUE	0.160277	0.0707367	2.26582	0.0234625	0.259118	7719.55	7206.31	7356.28	8461.35	8371.59	8066.37
ENSMUSG00000027422	Rrbp1	TRUE	0.195378	0.0862385	2.26555	0.0234789	0.259118	17504.3	17030	16560.4	20365.6	20283.1	17856.7
ENSMUSG00000000753	Serpinf1	TRUE	0.25031	0.110497	2.26531	0.0234939	0.259118	14800.9	17193.8	19020.2	20056.5	19930.2	20694.1
ENSMUSG00000022876	Samsn1	TRUE	-0.649879	0.286977	-2.26457	0.023539	0.259296	128.883	165.514	105.506	64.1185	99.2946	91.2077
ENSMUSG00000092060	Bend4	TRUE	-0.668912	0.295394	-2.26447	0.0235451	0.259296	156.721	92.6195	99.477	66.4084	75.1939	77.1758
ENSMUSG00000051177	Plcb1	TRUE	-0.448966	0.198305	-2.26402	0.0235728	0.259407	1030.03	1218.63	1511.25	1123.22	893.651	738.682
ENSMUSG00000037410	Tbc1d2b	TRUE	0.250009	0.110446	2.26363	0.0235966	0.259475	4001.54	3593.29	4350.86	4333.72	4891.46	4977.34
ENSMUSG00000018209	Stk4	TRUE	-0.207395	0.0916367	-2.26323	0.0236214	0.259554	1541.43	1614.84	1653.93	1310.99	1456.64	1397.18
ENSMUSG00000090124	Ugt1a7c	TRUE	-0.661031	0.29214	-2.26272	0.0236529	0.259706	200.026	213.539	175.843	108.772	177.381	86.1963
ENSMUSG00000027002	Nckap1	TRUE	0.181966	0.0805245	2.25976	0.0238361	0.261522	5109.93	5322.19	5247.16	6224.07	6015.51	5549.64
ENSMUSG00000030584	Dpf1	TRUE	0.688242	0.304729	2.25854	0.0239122	0.262163	48.4598	78.8981	62.2987	98.4676	83.8702	124.283
ENSMUSG00000028005	Gucy1b3	TRUE	1.10075	0.487468	2.25809	0.02394	0.262272	28.8697	16.2942	11.053	45.7989	42.4171	32.073
ENSMUSG00000073678	Pgap1	TRUE	-0.412062	0.182528	-2.25753	0.0239752	0.262409	640.288	671.491	920.414	490.048	561.062	625.424
ENSMUSG00000031502	Col4a1	TRUE	0.552969	0.244975	2.25725	0.0239925	0.262409	27844.8	19703.1	23495.7	23260.1	31858.1	49107.8
ENSMUSG00000028923	Necap2	TRUE	-0.179672	0.0796052	-2.25703	0.0240059	0.262409	2434.33	2392.67	2480.9	2162.85	2056.26	2233.09
ENSMUSG00000000093	Tbx2	TRUE	1.08609	0.481358	2.25631	0.0240513	0.26271	19.5901	10.2911	13.0626	28.6243	31.8128	30.0685
ENSMUSG00000029672	Fam3c	TRUE	0.411907	0.1826	2.25579	0.0240839	0.262871	2504.44	2447.56	2327.16	3950.16	3395.3	2340.33
ENSMUSG00000002459	Rgs20	TRUE	-1.95189	0.865518	-2.25517	0.0241224	0.263097	10.3106	12.0062	17.0819	1.14497	2.89207	6.0137
ENSMUSG00000050751	Pgbd5	TRUE	-1.24782	0.553674	-2.2537	0.0242149	0.263684	36.0871	53.1704	66.318	12.5947	39.525	13.0297
ENSMUSG00000036611	Eepd1	TRUE	-0.727512	0.322816	-2.25365	0.0242184	0.263684	73.2053	58.316	72.3469	34.3492	51.0933	37.0845
ENSMUSG00000030630	Fah	TRUE	0.247783	0.109966	2.25326	0.0242425	0.263684	1718.78	1683.44	1435.89	1809.06	1935.76	1999.55
ENSMUSG00000074570	Cass4	TRUE	-0.729652	0.323832	-2.25318	0.0242478	0.263684	149.504	152.651	80.3855	92.7428	69.4098	69.1575
ENSMUSG00000026627	Tmem206	TRUE	-0.361018	0.160258	-2.25273	0.0242761	0.263784	306.225	346.465	375.802	283.953	239.078	278.635
ENSMUSG00000074794	Arrdc3	TRUE	-0.418053	0.185598	-2.25247	0.0242928	0.263784	1116.64	1069.41	830.985	736.217	613.12	909.07
ENSMUSG00000030956	Fam53b	TRUE	-0.282529	0.125564	-2.25008	0.0244441	0.265231	589.766	591.735	700.359	509.513	513.825	523.192
ENSMUSG00000022788	Fgd4	TRUE	-0.316051	0.140563	-2.24846	0.0245466	0.266147	783.606	816.423	750.599	597.676	732.659	557.269
ENSMUSG00000091747	D17H6S56E-5	TRUE	-0.376235	0.167411	-2.24737	0.0246165	0.266322	1165.1	1055.69	1182.67	672.099	1001.62	946.155
ENSMUSG00000079470	Utp14b	TRUE	-0.511804	0.227738	-2.24733	0.0246187	0.266322	306.225	274.428	206.993	171.746	158.1	222.507
ENSMUSG00000003559	As3mt	TRUE	0.390547	0.173817	2.24689	0.0246468	0.266322	271.169	240.125	196.944	294.258	321.984	311.71
ENSMUSG00000031628	Casp3	TRUE	-0.241928	0.107678	-2.24679	0.0246537	0.266322	969.196	885.888	978.693	744.232	834.845	814.856
ENSMUSG00000022131	Gpr180	TRUE	0.220472	0.0981395	2.24652	0.0246709	0.266322	750.612	734.953	741.556	906.818	830.989	857.954
ENSMUSG00000066150	Slc31a1	TRUE	-0.181676	0.0808702	-2.24651	0.0246711	0.266322	2768.4	2764	2600.47	2407.88	2468.87	2294.22
ENSMUSG00000041037	Irgq	TRUE	0.206079	0.0917653	2.24572	0.024722	0.266482	1432.14	1523.93	1603.69	1827.38	1712.11	1721.92
ENSMUSG00000047238	Mageh1	TRUE	0.446838	0.198974	2.24572	0.0247222	0.266482	262.92	256.419	194.935	340.057	364.401	269.614
ENSMUSG00000020593	Lpin1	TRUE	-0.463742	0.206566	-2.245	0.0247681	0.266782	541.307	601.169	828.975	389.291	538.89	500.139
ENSMUSG00000049999	Ppp1r3d	TRUE	0.656918	0.292726	2.24414	0.0248236	0.267185	56.7083	66.8918	95.4578	99.6126	135.927	109.249
ENSMUSG00000025608	Podxl	TRUE	-2.36876	1.05591	-2.24333	0.0248756	0.267549	10.3106	9.43346	19.0916	5.72486	0	2.00457
ENSMUSG00000006651	Aplp1	TRUE	0.38031	0.169568	2.24281	0.0249088	0.267711	694.934	990.514	927.448	1175.89	981.377	1245.84
ENSMUSG00000058163	Gm5431	TRUE	-0.915713	0.408389	-2.24226	0.0249448	0.267902	43.3045	34.3035	50.2409	28.6243	19.2805	20.0457
ENSMUSG00000033365	Ipo13	TRUE	-0.204248	0.0911217	-2.24148	0.0249947	0.268243	1415.65	1458.76	1576.56	1309.85	1289.87	1263.88
ENSMUSG00000024998	Plce1	TRUE	0.299851	0.133875	2.23979	0.0251047	0.268905	782.575	925.337	813.903	1158.71	922.572	1026.34
ENSMUSG00000044712	Slc38a6	TRUE	-0.300249	0.134056	-2.23972	0.0251091	0.268905	420.673	420.218	372.788	321.737	345.121	318.726
ENSMUSG00000001440	Kpnb1	TRUE	0.132598	0.0592039	2.23969	0.0251112	0.268905	16018.5	15737.6	15583.7	17266.2	17129.8	17500.9
ENSMUSG00000011008	Mcoln2	TRUE	-0.732166	0.32703	-2.23884	0.0251666	0.268983	81.4537	59.1735	79.3807	48.0889	51.0933	33.0753
ENSMUSG00000042447	Mios	TRUE	0.302129	0.13495	2.23883	0.0251672	0.268983	705.245	601.169	593.848	820.945	696.026	825.881
ENSMUSG00000021720	Rnf180	TRUE	-0.718512	0.320946	-2.23873	0.0251732	0.268983	70.1121	56.6008	58.2795	34.3492	33.7409	44.1004
ENSMUSG00000036256	Igfbp7	TRUE	0.351873	0.1573	2.23695	0.0252894	0.270028	5521.33	6406.18	6024.89	6076.37	7635.08	9198.95
ENSMUSG00000018736	Ndel1	TRUE	0.28686	0.128502	2.23233	0.0255932	0.273029	3175.67	2938.95	2462.81	3841.38	3273.83	3350.63
ENSMUSG00000071454	Dtnb	TRUE	-0.366437	0.164166	-2.23211	0.0256075	0.273029	306.225	397.063	375.802	285.098	258.359	294.671
ENSMUSG00000032417	Rwdd2a	TRUE	-0.998148	0.447655	-2.22972	0.0257658	0.274518	26.8076	34.3035	39.1879	13.7397	19.2805	17.0388
ENSMUSG00000046721	Rpl14-ps1	FALSE	0.262449	0.11774	2.22905	0.0258106	0.274746	745.456	637.188	734.522	843.845	890.759	802.828
ENSMUSG00000037455	Slc18b1	TRUE	0.310135	0.13917	2.22846	0.0258499	0.274746	477.381	471.673	551.645	622.865	680.601	556.267
ENSMUSG00000048486	Fitm2	TRUE	0.316573	0.142061	2.22842	0.0258523	0.274746	513.468	527.416	546.621	626.3	763.508	586.335
ENSMUSG00000049421	Zfp260	TRUE	0.213858	0.0959744	2.22828	0.0258618	0.274746	2345.66	2365.23	2357.3	2919.68	2474.65	2805.39
ENSMUSG00000010051	Hyal1	TRUE	-0.43577	0.195758	-2.22607	0.0260098	0.27612	249.517	214.397	266.277	212.965	160.028	167.381
ENSMUSG00000031557	Plekha2	TRUE	-0.344332	0.154707	-2.2257	0.0260344	0.276182	3474.67	4334.25	4986.91	2981.51	3393.37	3703.43
ENSMUSG00000090063	Dlx6as1	FALSE	0.658159	0.295896	2.22429	0.0261287	0.276759	98.9818	93.477	94.4529	207.24	103.151	143.326
ENSMUSG00000029781	Fkbp9	TRUE	0.208288	0.0936495	2.22412	0.0261401	0.276759	16368.1	16398.8	18245.5	18080.3	20347.7	20504.7
ENSMUSG00000042216	Sgsm1	TRUE	0.676977	0.304403	2.22395	0.0261521	0.276759	72.1742	72.0374	91.4385	128.237	161.956	86.1963
ENSMUSG00000022199	Slc22a17	TRUE	0.372554	0.167533	2.22377	0.0261639	0.276759	327.877	263.279	252.209	329.752	385.61	374.854
ENSMUSG00000053332	Gas5	FALSE	0.456355	0.205285	2.22303	0.0262138	0.277087	4793.4	4229.62	4546.8	8267.85	5949	4403.03
ENSMUSG00000001918	Slc1a5	TRUE	0.402729	0.181218	2.22235	0.0262596	0.277336	2490.01	1617.41	2123.18	2445.66	2566.23	3222.34
ENSMUSG00000098061	RP23-204I16.2	FALSE	1.58086	0.71156	2.22168	0.0263052	0.277336	4.12424	11.1486	3.01446	18.3196	19.2805	18.0411
ENSMUSG00000054409	Tmem74	TRUE	-0.972929	0.437935	-2.22163	0.0263084	0.277336	27.8386	41.1642	52.2506	20.6095	23.1366	18.0411
ENSMUSG00000000915	Hip1r	TRUE	0.547236	0.246333	2.22153	0.0263153	0.277336	85.578	70.3222	103.496	139.687	117.611	121.276
ENSMUSG00000032089	Il10ra	TRUE	-0.411675	0.185348	-2.22108	0.0263453	0.277336	296.945	265.852	335.609	226.705	191.841	256.584
ENSMUSG00000072294	Klf12	TRUE	1.23181	0.554616	2.22101	0.0263502	0.277336	21.6523	30.0156	19.0916	99.6126	39.525	28.0639
ENSMUSG00000028161	Ppp3ca	TRUE	-0.263139	0.118509	-2.22042	0.0263906	0.277489	5527.51	4778.48	4971.84	3998.24	4818.2	3911.91
ENSMUSG00000022146	Osmr	TRUE	0.209766	0.0944791	2.22024	0.0264024	0.277489	3274.65	2989.55	3408.34	3968.48	3585.21	3632.27
ENSMUSG00000028965	Tnfrsf9	TRUE	-1.59668	0.719465	-2.21926	0.0264694	0.277899	38.1492	43.737	34.1638	11.4497	1.92805	25.0571
ENSMUSG00000019990	Pde7b	TRUE	-0.683238	0.307906	-2.21898	0.0264879	0.277899	159.814	144.075	131.631	127.092	85.7982	59.1347
ENSMUSG00000039704	Lmbrd2	TRUE	-0.223974	0.100942	-2.21883	0.026498	0.277899	1029	997.374	997.785	911.398	802.069	876.997
ENSMUSG00000025997	Ikzf2	TRUE	-0.453084	0.204246	-2.21832	0.0265329	0.278067	615.543	845.581	801.845	690.418	524.429	440.002
ENSMUSG00000020092	Pald1	TRUE	-0.462986	0.208896	-2.21635	0.0266679	0.279091	302.101	277.858	378.817	277.083	227.51	191.436
ENSMUSG00000050549	5730508B09Rik	TRUE	0.466917	0.210691	2.21612	0.0266834	0.279091	112.386	103.768	117.564	176.326	134.963	150.342
ENSMUSG00000026278	Bok	TRUE	0.269889	0.121796	2.2159	0.026698	0.279091	938.265	822.427	784.763	1063.68	937.996	1067.43
ENSMUSG00000039611	Tmem246	TRUE	0.510804	0.23053	2.21578	0.0267064	0.279091	98.9818	109.771	80.3855	149.991	140.748	122.278
ENSMUSG00000039242	B3galnt2	TRUE	0.22888	0.103318	2.21531	0.0267391	0.279235	842.376	794.984	908.356	1027.04	980.413	975.221
ENSMUSG00000024381	Bin1	TRUE	-0.174495	0.0788217	-2.21379	0.0268432	0.280124	3144.73	3468.08	3364.13	2966.62	2952.81	2922.66
ENSMUSG00000035165	Kcne3	TRUE	-1.92986	0.871907	-2.21338	0.0268717	0.280223	11.3417	10.2911	14.0675	4.57989	3.8561	1.00228
ENSMUSG00000042228	Lyn	TRUE	-0.32375	0.146345	-2.21224	0.0269502	0.280842	1265.11	1324.12	1265.07	1126.65	1127.91	825.881
ENSMUSG00000061175	Fnip2	TRUE	-0.306779	0.138748	-2.21104	0.0270328	0.281504	861.966	761.538	901.322	730.493	722.055	588.34
ENSMUSG00000050211	Pla2g4e	TRUE	1.8367	0.83081	2.21073	0.0270544	0.28153	3.09318	8.57588	5.02409	38.9291	10.6043	11.0251
ENSMUSG00000049086	Bmyc	TRUE	0.584156	0.264304	2.21017	0.0270936	0.28174	184.56	120.92	120.578	175.181	197.625	264.603
ENSMUSG00000026864	Hspa5	TRUE	0.217353	0.0983979	2.20892	0.0271799	0.282432	29114	26937.7	29192	29551.7	35074.1	34474.5
ENSMUSG00000033287	Kctd17	TRUE	0.26325	0.11919	2.20866	0.0271986	0.282432	1850.75	1765.77	1540.39	1854.86	2142.06	2190.99
ENSMUSG00000002980	Bcam	TRUE	0.458441	0.207737	2.20684	0.0273255	0.282967	646.475	908.185	716.436	922.848	860.874	1338.05
ENSMUSG00000097697	AC158296.1	FALSE	0.518798	0.235087	2.20684	0.0273255	0.282967	126.82	129.496	104.501	200.37	183.165	134.306
ENSMUSG00000048960	Prex2	TRUE	1.06125	0.480919	2.20671	0.0273341	0.282967	48.4598	45.4521	37.1783	92.7428	143.64	37.0845
ENSMUSG00000029086	Prom1	TRUE	2.86633	1.29901	2.20655	0.0273455	0.282967	8.24848	0	3.01446	4.57989	70.3738	6.0137
ENSMUSG00000037568	Vash2	TRUE	0.26578	0.120451	2.20654	0.0273461	0.282967	490.785	469.958	466.236	622.865	546.602	547.246
ENSMUSG00000052915	Msl1	TRUE	0.252483	0.114455	2.20595	0.0273872	0.283119	2087.9	2091.66	2473.86	2441.08	2643.36	2839.47
ENSMUSG00000036820	Amdhd2	TRUE	-0.306057	0.138762	-2.20562	0.0274103	0.283119	504.188	456.237	549.636	373.261	416.459	429.979
ENSMUSG00000097715	CT030166.1	FALSE	-0.796219	0.361014	-2.20551	0.0274185	0.283119	161.876	141.502	78.3758	99.6126	60.7336	60.137
ENSMUSG00000019992	Mtfr2	TRUE	-0.625214	0.283966	-2.20172	0.027685	0.285671	110.323	107.198	92.4433	48.0889	80.9781	71.1621
ENSMUSG00000044072	Eml6	TRUE	0.533339	0.242359	2.20061	0.0277634	0.286165	77.3295	102.053	82.3951	132.817	107.971	139.317
ENSMUSG00000035547	Capn5	TRUE	-0.270907	0.123112	-2.2005	0.0277717	0.286165	719.68	869.594	797.826	627.445	698.918	652.486
ENSMUSG00000031364	Grpr	TRUE	1.00351	0.456237	2.19953	0.0278401	0.286669	40.2113	23.1549	14.0675	45.7989	58.8055	50.1141
ENSMUSG00000031327	Chic1	TRUE	-0.350471	0.159386	-2.19889	0.0278859	0.286792	227.864	212.682	224.075	175.181	175.453	170.388
ENSMUSG00000024778	Fas	TRUE	-0.52684	0.239602	-2.19882	0.027891	0.286792	376.337	276.143	492.361	226.705	267.035	299.683
ENSMUSG00000070462	Mesdc1	TRUE	0.268755	0.122296	2.19757	0.0279794	0.287501	834.128	813.851	697.344	909.108	1014.15	902.054
ENSMUSG00000038412	Higd1a	TRUE	0.235295	0.107097	2.19703	0.0280181	0.287561	1254.8	1266.66	1396.7	1504.49	1436.4	1670.81
ENSMUSG00000050737	Ptges	TRUE	0.36987	0.168356	2.19695	0.0280243	0.287561	827.941	688.643	712.416	756.827	1055.61	1065.43
ENSMUSG00000037306	Man1c1	TRUE	-0.226386	0.103073	-2.19636	0.0280663	0.287792	1478.54	1549.66	1354.5	1294.96	1171.29	1281.92
ENSMUSG00000068748	Ptprz1	TRUE	1.79293	0.81653	2.19579	0.0281066	0.288005	548.524	539.423	307.474	2758.24	1748.74	328.749
ENSMUSG00000052142	Rasal3	TRUE	-0.809462	0.368753	-2.19513	0.0281541	0.288291	54.6462	43.737	50.2409	30.9143	32.7768	21.0479
ENSMUSG00000028412	Slc44a1	TRUE	-0.360496	0.164275	-2.19447	0.0282017	0.288578	2534.35	1981.88	2776.31	1622.43	1886.6	2168.94
ENSMUSG00000016256	Ctsz	TRUE	-0.184616	0.0841391	-2.19417	0.0282229	0.288594	5427.5	5732.12	6035.95	4784.84	5143.07	5200.84
ENSMUSG00000022635	Zcrb1	TRUE	0.26601	0.121261	2.19369	0.0282578	0.28875	659.878	599.454	580.785	778.581	760.616	673.534
ENSMUSG00000050910	Cdr2l	TRUE	0.311963	0.142301	2.19227	0.0283599	0.289588	1447.61	1842.96	1357.51	1785.01	1950.22	2036.64
ENSMUSG00000038880	Mrps34	TRUE	0.357711	0.163189	2.19201	0.028379	0.289588	248.485	228.118	234.123	291.968	345.121	272.621
ENSMUSG00000055932	Fto	TRUE	-0.215977	0.0985542	-2.19145	0.0284189	0.289794	5683.2	6266.39	6660.94	5596.63	4990.76	5437.38
ENSMUSG00000022526	Zfp251	TRUE	0.397423	0.181675	2.18755	0.0287022	0.29248	350.56	364.475	459.202	422.495	556.242	566.29
ENSMUSG00000034201	Gas2l1	TRUE	0.260011	0.118906	2.1867	0.0287644	0.292912	1056.84	1016.24	895.293	1080.85	1210.82	1261.87
ENSMUSG00000020640	Itsn2	TRUE	-0.210332	0.0962283	-2.18576	0.0288329	0.293407	1623.92	1644	1563.5	1362.52	1501.95	1310.99
ENSMUSG00000039835	Nhsl1	TRUE	-0.60774	0.278151	-2.18493	0.0288938	0.293705	151.566	175.805	263.262	145.412	102.187	140.32
ENSMUSG00000022554	Fam203a	TRUE	0.475441	0.217611	2.18482	0.028902	0.293705	101.044	108.056	108.52	155.716	163.884	122.278
ENSMUSG00000031402	Mpp1	TRUE	-0.210267	0.0962974	-2.18352	0.0289974	0.294425	2108.52	2142.25	2103.09	1937.29	1894.31	1661.78
ENSMUSG00000028919	Arhgef19	TRUE	-0.287877	0.131853	-2.18331	0.0290129	0.294425	707.307	911.616	851.081	681.259	674.817	668.523
ENSMUSG00000038119	Cdon	TRUE	-0.43054	0.197312	-2.18202	0.0291079	0.295185	1164.07	1514.5	1256.02	847.28	1261.91	809.844
ENSMUSG00000026797	Stxbp1	TRUE	0.18701	0.08573	2.18138	0.0291552	0.295462	1801.26	1902.13	1787.57	1988.82	2083.26	2178.96
ENSMUSG00000032714	Syde1	TRUE	0.224728	0.103064	2.18048	0.0292221	0.295852	1499.16	1657.72	1709.2	1754.1	1984.93	1946.43
ENSMUSG00000023348	Trip6	TRUE	0.205794	0.0943869	2.18032	0.0292338	0.295852	1145.51	1192.9	1111.33	1375.11	1356.38	1248.84
ENSMUSG00000029204	Rhoh	TRUE	-0.607428	0.278646	-2.17992	0.0292631	0.295945	90.7333	108.056	80.3855	52.6687	72.3019	58.1324
ENSMUSG00000043439	E130012A19Rik	TRUE	0.669852	0.307401	2.17908	0.0293258	0.296376	52.5841	67.7494	43.2072	69.8433	94.4744	96.2191
ENSMUSG00000031214	Ophn1	TRUE	-0.268141	0.123108	-2.1781	0.0293988	0.29691	706.276	647.479	584.804	525.542	549.494	534.217
ENSMUSG00000043445	Pgp	TRUE	0.420893	0.19329	2.17752	0.0294417	0.296991	201.057	212.682	209.002	219.835	290.171	322.735
ENSMUSG00000026502	Desi2	TRUE	-0.18182	0.0835073	-2.1773	0.0294581	0.296991	2641.58	2647.37	2912.97	2398.72	2447.66	2383.43
ENSMUSG00000020089	Ppa1	TRUE	0.263864	0.121196	2.17718	0.0294673	0.296991	1281.61	1198.05	1065.11	1562.89	1346.74	1348.07
ENSMUSG00000030022	Adamts9	TRUE	-0.413983	0.190215	-2.1764	0.0295253	0.297372	2146.67	2327.49	1682.07	1230.85	1477.85	1911.35
ENSMUSG00000036957	Lrfn3	TRUE	0.396464	0.182419	2.17337	0.0297524	0.299455	158.783	207.536	201.969	231.284	249.682	267.609
ENSMUSG00000035941	Ibtk	TRUE	0.195903	0.0901753	2.17247	0.0298204	0.299934	1798.17	1823.23	1987.53	2041.49	2213.4	2167.94
ENSMUSG00000042473	Tbc1d8b	TRUE	0.197128	0.0908193	2.17055	0.0299652	0.301185	2250.8	2427.83	2233.71	2711.3	2746.51	2468.62
ENSMUSG00000021701	Plk2	TRUE	-0.43879	0.202202	-2.17006	0.0300023	0.301353	2870.47	4371.12	2935.07	2026.6	2985.58	2495.68
ENSMUSG00000044033	Ccdc141	TRUE	0.623749	0.287501	2.16956	0.0300405	0.301531	111.354	130.353	67.3228	180.906	154.244	142.324
ENSMUSG00000028461	Ccdc107	TRUE	0.367545	0.169529	2.16804	0.0301557	0.302481	275.293	232.406	224.075	349.217	281.495	313.714
ENSMUSG00000028655	Mfsd2a	TRUE	0.995235	0.459161	2.16751	0.0301962	0.302681	21.6523	22.2973	12.0578	35.4942	46.2732	30.0685
ENSMUSG00000078812	Eif5a	TRUE	0.153369	0.0707945	2.1664	0.0302807	0.303152	8279.41	7924.97	7940.08	8983.46	8610.67	9258.08
ENSMUSG00000034168	Irf2bpl	TRUE	0.28782	0.132859	2.16635	0.0302844	0.303152	850.625	752.104	657.151	973.227	911.967	873.99
ENSMUSG00000037992	Rara	TRUE	0.50074	0.231286	2.16503	0.0303856	0.303929	987.756	1089.99	1449.95	1210.24	1580.04	2200.01
ENSMUSG00000066607	6030419C18Rik	TRUE	0.351755	0.162489	2.1648	0.0304032	0.303929	383.554	307.016	419.009	455.699	507.077	451.027
ENSMUSG00000060181	Slc35e3	TRUE	-0.35561	0.16434	-2.16386	0.0304751	0.304441	396.958	401.351	405.947	338.912	347.049	255.582
ENSMUSG00000044258	Ctla2a	TRUE	-0.77064	0.356328	-2.16273	0.0305623	0.305105	206.212	420.218	170.819	199.225	137.856	131.299
ENSMUSG00000032846	Zswim6	TRUE	-0.331521	0.153412	-2.16099	0.0306962	0.306205	1392.96	1667.15	1263.06	1088.87	1318.79	1028.34
ENSMUSG00000030789	Itgax	TRUE	-1.57658	0.72964	-2.16076	0.030714	0.306205	23.7144	12.8638	17.0819	10.3048	2.89207	5.01141
ENSMUSG00000030218	Mgp	TRUE	0.465586	0.21557	2.15979	0.0307887	0.306742	5030.54	3176.5	3127	4315.4	4931.95	6401.58
ENSMUSG00000020570	Sypl	TRUE	-0.184548	0.0854756	-2.15907	0.0308447	0.306903	2976.67	3010.99	3211.4	2698.7	2833.27	2561.83
ENSMUSG00000034040	Wbscr17	TRUE	-0.77598	0.359409	-2.15905	0.0308465	0.306903	91.7643	136.356	148.713	105.337	69.4098	46.105
ENSMUSG00000042350	1110018G07Rik	TRUE	-0.20607	0.0955126	-2.15751	0.0309656	0.30788	1407.4	1549.66	1536.37	1259.47	1368.92	1266.89
ENSMUSG00000051495	Irf2bp2	TRUE	0.188598	0.0874701	2.15615	0.0310723	0.308732	3220	3058.16	3397.29	3706.28	3836.82	3481.93
ENSMUSG00000031561	Tenm3	TRUE	-1.15226	0.534589	-2.1554	0.0311302	0.309099	26.8076	54.028	77.371	13.7397	23.1366	34.0776
ENSMUSG00000030671	Pde3b	TRUE	-0.487404	0.226178	-2.15495	0.0311654	0.309241	466.039	575.441	583.8	500.353	382.718	277.632
ENSMUSG00000051306	Usp42	TRUE	0.231166	0.107331	2.15377	0.0312581	0.309952	600.077	580.587	642.079	688.129	718.198	731.666
ENSMUSG00000038174	Fam126b	TRUE	-0.415749	0.193071	-2.15335	0.0312914	0.309978	729.991	934.77	562.698	567.906	567.811	535.219
ENSMUSG00000051022	Hs3st1	TRUE	-1.56426	0.726479	-2.1532	0.0313028	0.309978	72.1742	53.1704	29.1397	38.9291	5.78415	8.01826
ENSMUSG00000029913	Prdm5	TRUE	0.286597	0.133143	2.15255	0.0313537	0.310112	418.61	422.791	452.168	535.847	571.667	470.071
ENSMUSG00000037784	Dzip1l	TRUE	0.345936	0.160714	2.15249	0.0313584	0.310112	664.003	781.262	664.185	1061.39	866.658	755.721
ENSMUSG00000078652	Psme3	TRUE	0.180438	0.083879	2.15117	0.0314625	0.310864	2872.53	2544.46	2670.81	3039.9	3053.07	3069.99
ENSMUSG00000002257	Def6	TRUE	-0.201595	0.0937271	-2.15088	0.031486	0.310864	997.035	952.78	946.539	831.25	864.73	821.872
ENSMUSG00000044827	Tlr1	TRUE	-0.603551	0.280646	-2.15058	0.0315095	0.310864	113.417	78.0405	108.52	57.2486	75.1939	64.1461
ENSMUSG00000035390	Brsk1	TRUE	0.251317	0.116868	2.15043	0.0315213	0.310864	451.604	463.955	452.168	557.602	506.113	565.287
ENSMUSG00000031668	Eif2ak3	TRUE	0.223874	0.10413	2.14995	0.0315592	0.310864	1121.79	1028.25	1126.4	1181.61	1286.97	1355.09
ENSMUSG00000039680	Mrps6	TRUE	0.52435	0.243892	2.14993	0.0315611	0.310864	538.213	466.528	374.797	440.814	796.284	745.698
ENSMUSG00000036832	Lpar3	TRUE	-1.27222	0.59209	-2.1487	0.0316585	0.311615	24.7454	39.449	28.1349	4.57989	18.3165	15.0342
ENSMUSG00000031748	Gnao1	TRUE	-0.316189	0.147243	-2.14739	0.0317624	0.312392	913.519	945.062	765.672	779.726	609.264	720.641
ENSMUSG00000024076	Vit	TRUE	0.410405	0.191138	2.14717	0.0317798	0.312392	975.383	734.095	954.578	1486.17	1009.33	1045.38
ENSMUSG00000022708	Zbtb20	TRUE	-0.380961	0.177512	-2.14611	0.0318639	0.312703	5710.01	6389.03	5202.95	5559.99	3445.42	4283.76
ENSMUSG00000031246	Sh3bgrl	TRUE	-0.218322	0.101735	-2.146	0.0318733	0.312703	14321.4	16119.2	13308.8	12914.1	12870.7	11822.9
ENSMUSG00000031290	Lrch2	TRUE	-0.312145	0.145458	-2.14594	0.0318779	0.312703	821.755	1041.11	932.472	853.005	713.378	687.566
ENSMUSG00000097479	AC165433.1	FALSE	-0.904018	0.421315	-2.14571	0.0318964	0.312703	46.3977	50.5977	44.212	37.7841	20.2445	18.0411
ENSMUSG00000029710	Ephb4	TRUE	0.256985	0.1198	2.14512	0.0319435	0.312957	1383.68	1328.4	1404.74	1590.37	1465.32	1863.24
ENSMUSG00000069662	Marcks	TRUE	-0.263515	0.122901	-2.14413	0.0320228	0.313488	19405.6	16548.9	18608.2	16519.7	15935.3	12998.6
ENSMUSG00000000901	Mmp11	TRUE	0.349431	0.162988	2.14391	0.0320403	0.313488	609.357	696.361	733.518	752.247	802.069	1043.38
ENSMUSG00000024534	Sncaip	TRUE	0.44962	0.209871	2.14237	0.032164	0.314389	1561.02	867.879	1245.97	1456.41	1706.32	1853.22
ENSMUSG00000069920	B3gnt9	TRUE	0.244949	0.114366	2.14181	0.0322089	0.314389	851.656	836.148	766.677	1061.39	908.111	941.143
ENSMUSG00000035472	Slc25a21	TRUE	1.30958	0.611458	2.14173	0.032215	0.314389	16.497	20.5821	24.1156	38.9291	93.5104	19.0434
ENSMUSG00000031486	Gpr124	TRUE	0.45472	0.212317	2.1417	0.0322177	0.314389	3111.74	2938.95	2088.01	4521.5	2721.44	3912.91
ENSMUSG00000048285	Frmd6	TRUE	-0.316976	0.148063	-2.14083	0.032288	0.314867	3662.33	3721.93	3227.48	3426.9	2666.49	2427.53
ENSMUSG00000047253	Krtap1-5	TRUE	-1.62217	0.758017	-2.14002	0.0323529	0.315291	12.3727	19.7245	22.106	5.72486	1.92805	10.0228
ENSMUSG00000021895	Arhgef3	TRUE	-0.592699	0.277098	-2.13895	0.0324397	0.315928	140.224	176.663	172.829	72.1333	117.611	134.306
ENSMUSG00000020641	Rsad2	TRUE	-1.04973	0.490831	-2.13867	0.0324625	0.315941	34.025	33.4459	34.1638	10.3048	13.4963	25.0571
ENSMUSG00000028218	Fam92a	TRUE	0.267675	0.12534	2.13558	0.0327133	0.318172	698.028	618.321	591.838	824.38	764.472	708.614
ENSMUSG00000043614	Vps37d	TRUE	0.703167	0.329342	2.13507	0.0327554	0.318371	44.3356	55.7432	63.3036	69.8433	118.575	77.1758
ENSMUSG00000030351	Tspan11	TRUE	-1.01235	0.474739	-2.13242	0.0329721	0.320266	217.554	86.6163	59.2843	58.3936	69.4098	52.1187
ENSMUSG00000024900	Cpt1a	TRUE	-0.283645	0.133044	-2.13197	0.0330094	0.320349	1839.41	2015.33	1555.46	1614.41	1470.14	1362.1
ENSMUSG00000050107	Gsg2	TRUE	0.515372	0.241755	2.13179	0.0330241	0.320349	83.5159	106.341	88.424	114.497	157.136	126.288
ENSMUSG00000044313	Mab21l3	TRUE	-0.747184	0.350639	-2.13092	0.0330955	0.320831	47.4288	63.4615	57.2747	27.4793	41.4531	31.0708
ENSMUSG00000021400	Wrnip1	TRUE	0.242952	0.114033	2.13055	0.0331261	0.320916	552.648	559.147	498.39	621.72	623.724	660.504
ENSMUSG00000026042	Col5a2	TRUE	0.282053	0.132501	2.12868	0.0332808	0.321772	74612.7	84837.7	94143.5	109280	111007	88064.6
ENSMUSG00000074247	Dda1	TRUE	0.184023	0.0864583	2.12847	0.0332985	0.321772	1848.69	1698.88	1701.16	1920.12	2040.84	1999.55
ENSMUSG00000028427	Aqp7	TRUE	1.60383	0.753519	2.12846	0.033299	0.321772	16.497	5.14553	9.04337	10.3048	54.9494	27.0616
ENSMUSG00000022861	Dgkg	TRUE	0.962552	0.452318	2.12804	0.0333336	0.321772	120.634	126.065	76.3662	362.956	175.453	92.21
ENSMUSG00000037418	Best1	TRUE	1.60732	0.755317	2.12801	0.0333363	0.321772	7.21742	4.28794	3.01446	20.6095	10.6043	13.0297
ENSMUSG00000029575	Mmab	TRUE	0.24015	0.112858	2.1279	0.0333455	0.321772	606.263	541.138	589.828	648.055	698.918	702.6
ENSMUSG00000049723	Mmp12	TRUE	-1.31368	0.617802	-2.12637	0.0334722	0.322783	2674.57	3269.12	847.062	1125.51	556.242	1050.39
ENSMUSG00000027219	Slc28a2	TRUE	-1.18166	0.556012	-2.12525	0.0335661	0.323385	44.3356	34.3035	26.1253	24.0444	15.4244	7.01598
ENSMUSG00000070284	Gmppb	TRUE	0.212785	0.10015	2.12467	0.0336146	0.323385	940.327	936.486	840.028	1070.55	1022.83	1056.41
ENSMUSG00000029994	Anxa4	TRUE	-0.223392	0.105152	-2.12447	0.0336312	0.323385	2903.47	2896.93	3197.33	2551	2346.44	2809.4
ENSMUSG00000007739	Cct4	TRUE	0.2279	0.107276	2.12442	0.0336352	0.323385	6227.6	5871.04	5120.56	6347.73	6643.09	7174.34
ENSMUSG00000026111	Unc50	TRUE	0.218359	0.102819	2.12372	0.0336935	0.323385	795.978	750.389	780.744	930.863	933.176	842.92
ENSMUSG00000058881	Zfp516	TRUE	-0.222983	0.105001	-2.12363	0.0337015	0.323385	2087.9	2510.16	2471.85	2017.44	1989.75	2051.67
ENSMUSG00000050711	Scg2	TRUE	1.30371	0.614002	2.12331	0.0337282	0.323385	8.24848	6.8607	10.0482	28.6243	13.4963	20.0457
ENSMUSG00000035967	Ddx26b	TRUE	-0.334403	0.157493	-2.12329	0.0337299	0.323385	475.319	470.816	518.486	395.016	324.876	442.007
ENSMUSG00000021573	Tppp	TRUE	-0.797231	0.375475	-2.12326	0.0337321	0.323385	38.1492	54.028	48.2313	32.0592	23.1366	26.0593
ENSMUSG00000016520	Lnx2	TRUE	0.330629	0.155838	2.12161	0.0338702	0.324498	413.455	414.215	390.874	515.238	587.091	429.979
ENSMUSG00000032198	Dock6	TRUE	0.263247	0.124197	2.11959	0.0340409	0.325877	804.227	786.408	682.272	848.425	887.867	991.258
ENSMUSG00000037257	Aagab	TRUE	-0.285637	0.13478	-2.11928	0.0340668	0.325877	853.718	873.024	801.845	774.001	708.558	593.351
ENSMUSG00000002846	Timmdc1	TRUE	0.274497	0.129534	2.11912	0.0340805	0.325877	421.704	378.196	401.927	496.918	510.933	445.013
ENSMUSG00000097124	AC115727.1	FALSE	-0.880211	0.415718	-2.11733	0.0342322	0.326871	46.3977	52.3128	36.1735	16.0296	29.8848	27.0616
ENSMUSG00000020986	Sec23a	TRUE	0.209368	0.0988911	2.11715	0.034247	0.326871	7239.07	7209.74	7050.81	9170.09	8183.61	7506.09
ENSMUSG00000036699	Zcchc12	TRUE	2.83868	1.34089	2.11701	0.0342589	0.326871	1.03106	0.857588	1.00482	8.01481	10.6043	2.00457
ENSMUSG00000024942	Capn1	TRUE	0.32868	0.155269	2.11684	0.0342732	0.326871	1326.97	1261.51	1148.51	1243.44	1691.86	1756
ENSMUSG00000090362	Vmn2r79	TRUE	-3.16618	1.49704	-2.11496	0.0344333	0.328186	3.09318	9.43346	6.02891	1.14497	0.964025	0
ENSMUSG00000034663	Bmp2k	TRUE	-0.19908	0.0942024	-2.11332	0.034573	0.329304	3601.49	3452.65	4046.4	3307.83	3160.07	3201.29
ENSMUSG00000027452	Acss1	TRUE	-0.69397	0.328495	-2.11257	0.0346375	0.329499	108.261	111.486	121.583	45.7989	101.223	63.1438
ENSMUSG00000031284	Pak3	TRUE	0.225848	0.106907	2.11256	0.0346382	0.329499	1653.82	1475.91	1403.73	1865.16	1771.88	1664.79
ENSMUSG00000032348	Gsta4	TRUE	-0.555679	0.263239	-2.11093	0.034778	0.330233	102.075	117.49	99.477	62.9735	89.6543	64.1461
ENSMUSG00000038168	Leprel1	TRUE	0.845746	0.400651	2.11093	0.0347784	0.330233	299.007	133.784	113.544	227.85	274.747	478.089
ENSMUSG00000019989	Enpp3	TRUE	0.677564	0.321023	2.11064	0.0348032	0.330233	61.8636	50.5977	37.1783	75.5682	68.4458	95.2168
ENSMUSG00000028264	Spaca1	TRUE	-1.45791	0.690823	-2.1104	0.0348239	0.330233	79.3916	32.5883	40.1927	11.4497	37.597	6.0137
ENSMUSG00000020018	Snrpf	TRUE	0.595471	0.282177	2.11027	0.0348351	0.330233	225.802	140.644	109.525	262.199	214.014	242.552
ENSMUSG00000050967	Creg2	TRUE	-0.854234	0.404864	-2.10993	0.0348647	0.330233	39.1803	43.737	38.1831	24.0444	26.9927	16.0365
ENSMUSG00000050912	Tmem123	TRUE	-0.258603	0.122574	-2.10977	0.0348779	0.330233	4421.19	4087.26	5324.53	3639.87	3991.06	3929.95
ENSMUSG00000032656	March3	TRUE	0.557272	0.264163	2.10958	0.0348947	0.330233	239.206	217.827	179.863	203.805	390.43	341.778
ENSMUSG00000032376	Usp3	TRUE	-0.229429	0.108791	-2.10891	0.0349527	0.33057	743.394	755.535	731.508	680.114	630.472	593.351
ENSMUSG00000027221	Chst1	TRUE	-0.547428	0.259762	-2.10742	0.0350812	0.331573	621.729	759.823	772.705	354.942	402.962	715.63
ENSMUSG00000097249	AL805969.1	FALSE	3.03351	1.43982	2.10686	0.0351295	0.331806	0	2.57276	0	4.57989	7.7122	10.0228
ENSMUSG00000055652	Klhl25	TRUE	0.295296	0.140175	2.10662	0.0351509	0.331806	528.934	420.218	437.096	586.226	576.487	537.223
ENSMUSG00000057836	Xlr3a	TRUE	-4.38202	2.08055	-2.10618	0.0351885	0.331948	5.1553	0	18.0867	0	0.964025	0
ENSMUSG00000039476	Prrx2	TRUE	-0.264131	0.125452	-2.10543	0.0352537	0.332195	1229.02	1513.64	1543.4	1262.9	1145.26	1162.65
ENSMUSG00000031024	St5	TRUE	-0.380468	0.180714	-2.10536	0.0352597	0.332195	2171.41	2134.54	2113.13	1319.01	1470.14	2140.88
ENSMUSG00000020232	Hmg20b	TRUE	0.331302	0.157554	2.10278	0.0354846	0.3341	1003.22	763.253	712.416	1119.78	984.269	1014.31
ENSMUSG00000052298	Cdc42se2	TRUE	-0.197429	0.0940037	-2.10023	0.0357086	0.335994	1584.74	1562.52	1633.83	1496.48	1322.64	1352.08
ENSMUSG00000015126	Tsr3	TRUE	0.372197	0.177248	2.09987	0.0357405	0.336079	240.237	195.53	188.906	272.503	244.862	290.662
ENSMUSG00000029641	Rasl11a	TRUE	0.428687	0.20419	2.09945	0.0357774	0.336212	237.144	198.96	173.834	324.027	239.078	258.589
ENSMUSG00000024792	Zfpl1	TRUE	0.247822	0.118076	2.09884	0.0358311	0.336502	604.201	571.153	576.766	724.768	627.58	728.659
ENSMUSG00000040616	Tmem51	TRUE	-1.13382	0.540283	-2.09856	0.0358553	0.336515	27.8386	37.7339	40.1927	21.7545	6.74817	20.0457
ENSMUSG00000079426	Arpc4	TRUE	-0.167705	0.0799488	-2.09766	0.0359355	0.337052	4763.5	4957.71	4597.04	4052.06	4434.51	4259.7
ENSMUSG00000034620	Tmem5	TRUE	0.249434	0.118943	2.09709	0.035986	0.337311	1268.2	1173.18	1109.32	1463.28	1509.66	1247.84
ENSMUSG00000070526	Peg12	TRUE	0.391272	0.186622	2.0966	0.0360288	0.337498	158.783	135.499	164.79	211.82	209.193	180.411
ENSMUSG00000050014	Apol10b	TRUE	-1.50134	0.716391	-2.0957	0.0361084	0.338029	9.27954	25.7276	37.1783	6.86984	12.5323	6.0137
ENSMUSG00000072772	Grcc10	TRUE	0.530631	0.253289	2.09496	0.0361745	0.338433	62.8947	66.8918	55.265	83.583	88.6903	95.2168
ENSMUSG00000019779	Frk	TRUE	0.371052	0.177205	2.09391	0.0362684	0.339095	710.4	650.909	521.501	879.339	893.651	662.509
ENSMUSG00000021133	4933426M11Rik	TRUE	-0.144395	0.0689836	-2.09317	0.0363337	0.339491	5128.49	5042.62	4947.73	4648.59	4613.82	4417.06
ENSMUSG00000030306	Tmtc1	TRUE	0.928743	0.443799	2.09271	0.036375	0.339661	58.7704	20.5821	31.1494	85.8729	65.5537	58.1324
ENSMUSG00000040998	Npnt	TRUE	-0.512986	0.245259	-2.09161	0.0364734	0.34015	11969.6	11769.5	21909.1	11520.7	8370.63	12097.6
ENSMUSG00000069184	Zfp72	TRUE	0.757852	0.36233	2.09161	0.0364735	0.34015	26.8076	29.158	47.2265	58.3936	62.6616	53.121
ENSMUSG00000060733	Ipmk	TRUE	-0.215237	0.102918	-2.09134	0.036498	0.340163	1127.98	1108	1162.58	944.602	1059.46	922.1
ENSMUSG00000029752	Asns	TRUE	0.379648	0.181632	2.09021	0.0365993	0.340891	2700.35	2378.09	3075.75	4494.02	3216.95	2898.6
ENSMUSG00000000531	Grasp	TRUE	0.395294	0.18919	2.08941	0.0366709	0.341343	137.131	114.917	124.597	170.601	164.848	159.363
ENSMUSG00000030788	Rnf141	TRUE	-0.215041	0.10295	-2.08879	0.036727	0.341386	1175.41	1228.92	1210.81	1126.65	1026.69	963.194
ENSMUSG00000022106	Rcbtb2	TRUE	-0.197922	0.094762	-2.08863	0.0367414	0.341386	2577.65	2626.79	2337.21	2162.85	2320.41	2091.76
ENSMUSG00000022479	Vdr	TRUE	-0.473981	0.226953	-2.08846	0.0367565	0.341386	2130.17	1854.1	1305.26	1630.44	1183.82	995.267
ENSMUSG00000039899	Fgl2	TRUE	-0.947694	0.453877	-2.08799	0.0367983	0.341386	28.8697	31.7307	43.2072	18.3196	13.4963	22.0502
ENSMUSG00000055172	C1ra	TRUE	-0.468838	0.224552	-2.08789	0.0368082	0.341386	823.817	850.727	1283.15	545.007	753.867	836.906
ENSMUSG00000055069	Rab39	TRUE	-0.998701	0.478348	-2.08782	0.0368145	0.341386	27.8386	31.7307	26.1253	10.3048	17.3524	15.0342
ENSMUSG00000026939	Tmem141	TRUE	-0.483427	0.231643	-2.08695	0.0368926	0.341894	195.901	197.245	200.964	108.772	133.999	181.413
ENSMUSG00000024845	Tmem134	FALSE	0.245128	0.117501	2.08618	0.0369626	0.342188	1021.78	904.755	817.922	1073.98	1083.56	1094.49
ENSMUSG00000042680	Garem	TRUE	0.718933	0.344632	2.08609	0.0369707	0.342188	188.684	179.236	166.8	449.974	275.711	155.354
ENSMUSG00000055733	Nap1l3	TRUE	0.930828	0.446336	2.08549	0.037025	0.342475	18.5591	26.5852	25.1205	27.4793	47.2372	59.1347
ENSMUSG00000025393	Atp5b	TRUE	0.174517	0.0837169	2.08461	0.0371047	0.342857	17501.2	15602.9	15354.6	18271.5	18541.1	17875.7
ENSMUSG00000024740	Ddb1	TRUE	0.147681	0.0708465	2.08452	0.0371128	0.342857	21061.5	22180.6	21435.8	22809	24687.7	24152
ENSMUSG00000062312	Erbb2	TRUE	0.239013	0.114695	2.0839	0.0371694	0.343165	781.544	836.148	816.917	920.558	892.687	1060.42
ENSMUSG00000030614	Tmem126b	TRUE	-0.280829	0.134779	-2.08361	0.0371952	0.343188	515.53	432.224	449.154	393.871	388.502	366.835
ENSMUSG00000031788	Kifc3	TRUE	0.316896	0.152235	2.08163	0.0373762	0.344642	1030.03	1318.11	943.525	1289.24	1483.63	1329.03
ENSMUSG00000036985	Zdhhc9	TRUE	0.170486	0.0819352	2.08075	0.0374572	0.345079	2354.94	2489.58	2427.64	2792.59	2583.59	2810.4
ENSMUSG00000060600	Eno3	TRUE	-0.646425	0.310691	-2.0806	0.0374704	0.345079	391.803	579.729	537.578	498.063	240.042	227.518
ENSMUSG00000041920	Slc16a6	TRUE	-0.434141	0.20877	-2.07952	0.0375693	0.345657	373.244	355.041	288.383	204.95	236.186	310.708
ENSMUSG00000057098	Ebf1	TRUE	0.181485	0.0872775	2.07941	0.0375801	0.345657	4291.27	3738.22	3879.6	4515.77	4412.34	4575.42
ENSMUSG00000042419	Nfkbil1	TRUE	0.449139	0.216121	2.07819	0.0376921	0.346396	119.603	154.366	119.573	158.006	175.453	204.466
ENSMUSG00000032409	Atr	TRUE	0.179968	0.0866054	2.07802	0.0377075	0.346396	1160.97	1217.77	1162.58	1338.47	1299.51	1375.13
ENSMUSG00000049184	Purg	TRUE	0.345417	0.166266	2.0775	0.0377554	0.346621	194.87	172.375	186.896	228.995	254.503	219.5
ENSMUSG00000038366	Lasp1	TRUE	0.193979	0.0933835	2.07723	0.0377805	0.346635	10357	11154.6	10507.4	11116.5	13101.1	12408.3
ENSMUSG00000035051	Dhx57	TRUE	0.205312	0.0988523	2.07696	0.0378055	0.346649	1136.23	1238.36	1197.74	1472.43	1339.99	1308.98
ENSMUSG00000022667	Cd200r1	TRUE	-0.533358	0.256912	-2.07603	0.037891	0.347216	268.076	244.412	201.969	120.222	155.208	217.495
ENSMUSG00000021913	Ogdhl	TRUE	-0.681488	0.328624	-2.07376	0.0381012	0.348926	147.442	228.976	318.527	116.787	192.805	123.281
ENSMUSG00000026207	Speg	TRUE	0.241577	0.116634	2.07124	0.0383366	0.350863	1669.29	1405.59	1581.58	1657.92	1890.45	1953.45
ENSMUSG00000038384	Setd1b	TRUE	0.207506	0.100229	2.07031	0.0384235	0.35144	1309.45	1445.89	1394.69	1598.38	1490.38	1704.88
ENSMUSG00000022261	Sdc2	TRUE	-0.272414	0.13167	-2.06891	0.0385548	0.352211	13718.3	12314.1	15260.2	13152.3	10526.2	10509.9
ENSMUSG00000027803	Wwtr1	TRUE	0.176876	0.0854929	2.0689	0.0385555	0.352211	3841.73	3564.99	3705.77	4443.64	4164.59	3954
ENSMUSG00000027207	Galk2	TRUE	0.240134	0.116099	2.06835	0.0386071	0.352463	1328.01	1155.17	1217.84	1304.12	1512.55	1551.53
ENSMUSG00000025856	Pdgfa	TRUE	-0.417072	0.201799	-2.06677	0.0387557	0.3536	1973.45	1873.83	2998.38	2002.56	1625.35	1499.41
ENSMUSG00000070972	Dnajc25	TRUE	0.244506	0.118362	2.06575	0.0388521	0.354218	900.115	837.006	840.028	1120.93	1019.94	913.079
ENSMUSG00000007655	Cav1	TRUE	-0.33609	0.162713	-2.06555	0.0388714	0.354218	10688	9099.86	10123.5	6020.27	8630.91	9041.59
ENSMUSG00000026656	Fcgr2b	TRUE	-0.868851	0.420704	-2.06523	0.038901	0.354268	427.89	651.767	409.966	340.057	380.79	95.2168
ENSMUSG00000032115	Hyou1	TRUE	0.16009	0.0775479	2.0644	0.0389799	0.354767	4842.89	5051.19	5174.82	5458.08	5898.87	5479.48
ENSMUSG00000017002	Slpi	TRUE	-0.730448	0.35388	-2.06411	0.0390071	0.354796	109.292	63.4615	62.2987	38.9291	52.0573	50.1141
ENSMUSG00000048355	Arxes1	TRUE	0.661163	0.32039	2.06362	0.0390539	0.355002	50.5219	48.0249	71.3421	66.4084	107.007	94.2146
ENSMUSG00000038047	Haus6	TRUE	0.295003	0.14298	2.06324	0.0390894	0.355106	662.972	722.089	542.602	739.652	823.277	802.828
ENSMUSG00000040690	Col16a1	TRUE	0.249048	0.120731	2.06284	0.0391279	0.355237	7687.58	8466.96	8310.85	9309.77	8583.68	11182.5
ENSMUSG00000055633	Zfp580	TRUE	0.698852	0.338828	2.06255	0.039155	0.355264	61.8636	51.4553	43.2072	64.1185	75.1939	114.26
ENSMUSG00000057914	Cacnb2	TRUE	-0.614085	0.297819	-2.06194	0.0392135	0.355331	105.168	114.917	79.3807	76.7132	70.3738	49.1118
ENSMUSG00000026628	Atf3	TRUE	-0.368106	0.178527	-2.06191	0.0392161	0.355331	485.629	390.202	425.038	354.942	378.862	273.623
ENSMUSG00000030157	Clec2d	TRUE	-0.506385	0.245613	-2.06172	0.0392348	0.355331	494.909	385.057	535.568	227.85	343.193	423.966
ENSMUSG00000012017	Scarf2	TRUE	0.340974	0.165441	2.061	0.0393034	0.355657	1868.28	1565.1	1270.09	2224.68	1974.32	1759.01
ENSMUSG00000027674	Pex5l	TRUE	2.20377	1.06936	2.06083	0.0393189	0.355657	9.27954	0.857588	2.00964	11.4497	37.597	6.0137
ENSMUSG00000075415	Fnbp1	TRUE	-0.252052	0.122334	-2.06035	0.0393646	0.355851	3138.55	3208.24	2553.24	2358.64	2679.02	2435.55
ENSMUSG00000042747	Krtcap2	TRUE	0.181911	0.0883288	2.05947	0.039449	0.356396	1811.57	1636.28	1816.71	1992.25	1952.15	2025.61
ENSMUSG00000048521	Cxcr6	TRUE	-1.30708	0.634995	-2.05841	0.0395505	0.357071	25.7765	29.158	12.0578	12.5947	7.7122	7.01598
ENSMUSG00000041649	Klf8	TRUE	0.529861	0.257488	2.05781	0.0396088	0.357071	94.8575	114.917	83.3999	161.441	109.899	153.349
ENSMUSG00000024858	Adrbk1	TRUE	-0.171649	0.083415	-2.05777	0.0396125	0.357071	2227.09	2168.84	2093.04	1971.64	1961.79	1828.16
ENSMUSG00000038552	Fndc4	TRUE	0.567013	0.275559	2.05768	0.0396207	0.357071	134.038	83.186	139.67	169.456	146.532	211.482
ENSMUSG00000087574	C030037D09Rik	FALSE	0.61122	0.297225	2.05642	0.039742	0.357945	53.6151	43.737	39.1879	67.5534	64.5897	76.1735
ENSMUSG00000033792	Atp7a	TRUE	-0.2189	0.106533	-2.05476	0.0399021	0.358997	1438.33	1524.79	1469.04	1346.49	1325.53	1137.59
ENSMUSG00000052565	Hist1h1d	TRUE	0.610779	0.297274	2.0546	0.0399179	0.358997	77.3295	46.3097	64.3084	81.2931	106.043	98.2237
ENSMUSG00000019188	H13	TRUE	0.232468	0.113153	2.05445	0.0399318	0.358997	3155.04	3655.9	2986.32	3726.89	4136.63	3648.31
ENSMUSG00000037706	Cd81	TRUE	-0.199722	0.0972553	-2.05358	0.0400159	0.359533	8575.33	9770.5	10065.3	8691.49	7846.2	8202.68
ENSMUSG00000009876	Cox4i2	TRUE	0.538153	0.262226	2.05225	0.0401454	0.36036	740.301	764.111	582.795	819.8	730.731	1480.37
ENSMUSG00000030591	Psmd8	TRUE	0.306779	0.149493	2.05213	0.0401569	0.36036	4991.36	4640.41	3575.14	5938.97	5565.32	4833.01
ENSMUSG00000024776	Stambpl1	TRUE	0.27148	0.132524	2.04854	0.0405067	0.363141	303.132	280.431	280.344	352.652	348.013	341.778
ENSMUSG00000011658	Fuz	TRUE	-0.446816	0.218124	-2.04845	0.040516	0.363141	179.404	202.391	261.253	146.556	146.532	178.406
ENSMUSG00000030796	Tead2	TRUE	0.412937	0.201643	2.04786	0.0405735	0.363435	1081.58	1107.15	728.493	1554.87	1247.45	1083.47
ENSMUSG00000042515	Mum1l1	TRUE	0.240723	0.117584	2.04724	0.0406347	0.363762	779.481	845.581	847.062	964.067	1071.03	886.018
ENSMUSG00000016262	Sertad4	TRUE	0.323566	0.158092	2.04669	0.0406887	0.36399	427.89	453.664	548.631	624.01	519.609	646.472
ENSMUSG00000022574	Naprt1	TRUE	0.506188	0.247366	2.04631	0.0407256	0.36399	84.5469	92.6195	93.4481	119.077	107.007	158.361
ENSMUSG00000027353	Mcm8	TRUE	0.382819	0.187086	2.04622	0.0407343	0.36399	180.436	158.654	160.771	184.341	228.474	237.541
ENSMUSG00000062093	Gm10110	TRUE	1.55872	0.762455	2.04434	0.0409196	0.364792	5.1553	6.00311	8.03855	34.3492	13.4963	9.02054
ENSMUSG00000038976	Ppp1r9b	TRUE	0.165977	0.0811908	2.04429	0.0409252	0.364792	2646.73	2646.52	2815.5	2888.77	3125.37	3081.02
ENSMUSG00000047749	Zc3hav1l	TRUE	0.416062	0.203551	2.04401	0.0409524	0.364792	337.157	386.772	563.703	553.022	586.127	578.317
ENSMUSG00000025153	Fasn	TRUE	0.293234	0.143469	2.04389	0.0409643	0.364792	5891.48	6660.88	5717.42	6279.03	7260.07	8848.15
ENSMUSG00000017707	Serinc3	TRUE	-0.195119	0.0954722	-2.04372	0.0409811	0.364792	10022.9	9526.08	10814.9	9001.77	9366.46	8153.57
ENSMUSG00000017929	B4galt5	TRUE	0.180697	0.0884274	2.04345	0.0410079	0.364792	1971.39	1782.07	1767.48	2109.04	2039.88	2107.8
ENSMUSG00000031505	Carkd	TRUE	0.220904	0.108106	2.04341	0.0410117	0.364792	717.618	653.482	724.474	771.712	821.349	846.929
ENSMUSG00000025932	Eya1	TRUE	-0.427768	0.209351	-2.04331	0.0410221	0.364792	639.257	520.556	503.414	524.397	394.286	318.726
ENSMUSG00000044092	C130050O18Rik	TRUE	-0.634449	0.310682	-2.04212	0.0411398	0.365521	76.2984	61.7463	58.2795	37.7841	48.2012	40.0913
ENSMUSG00000022144	Gdnf	TRUE	-0.725446	0.355266	-2.04198	0.0411537	0.365521	129.914	277.858	209.002	163.731	79.05	131.299
ENSMUSG00000020826	Nos2	TRUE	1.52865	0.748781	2.04152	0.0411995	0.365521	4.12424	6.00311	3.01446	13.7397	12.5323	12.0274
ENSMUSG00000020142	Slc1a4	TRUE	0.232337	0.113808	2.04148	0.0412033	0.365521	2346.69	2394.38	2359.31	3168.14	2501.64	2674.09
ENSMUSG00000033991	Ttc37	TRUE	0.186799	0.091566	2.04005	0.041345	0.366407	1311.51	1390.15	1307.27	1585.79	1437.36	1542.51
ENSMUSG00000041598	Cdc42ep4	TRUE	0.325012	0.159328	2.03989	0.0413616	0.366407	704.214	797.556	817.922	815.221	930.284	1159.64
ENSMUSG00000027583	Zbtb46	TRUE	0.802349	0.393362	2.03972	0.0413778	0.366407	86.609	66.0342	106.511	82.438	136.892	231.527
ENSMUSG00000018076	Med13l	TRUE	-0.239684	0.117545	-2.03909	0.0414415	0.366728	3287.02	3111.33	3020.48	3050.21	2506.46	2422.52
ENSMUSG00000041895	Wipi1	TRUE	0.178042	0.0873242	2.03886	0.0414638	0.366728	4013.92	4215.9	4058.46	4328	4600.33	4973.33
ENSMUSG00000041084	Ostc	TRUE	0.172996	0.0848722	2.03831	0.0415188	0.366808	3706.66	3419.2	3460.6	4192.89	3783.8	3959.02
ENSMUSG00000032735	Ablim3	TRUE	-0.596888	0.292847	-2.03822	0.0415276	0.366808	107.23	111.486	181.872	75.5682	93.5104	95.2168
ENSMUSG00000066538	Gm6254	FALSE	-1.75191	0.859611	-2.03802	0.0415475	0.366808	10.3106	12.0062	9.04337	3.43492	1.92805	4.00913
ENSMUSG00000027994	Ccdc109b	TRUE	-0.297105	0.145876	-2.03669	0.0416809	0.367527	596.984	625.181	599.877	575.921	428.991	480.093
ENSMUSG00000052751	Repin1	TRUE	0.350333	0.172015	2.03665	0.0416855	0.367527	297.976	261.564	331.59	375.551	330.661	428.977
ENSMUSG00000096956	AC137123.1	FALSE	0.243651	0.119646	2.03644	0.0417065	0.367527	750.612	764.968	663.18	933.153	810.745	837.908
ENSMUSG00000028001	Fga	TRUE	4.90764	2.41042	2.03601	0.0417491	0.367527	0	0	0	0	3.8561	12.0274
ENSMUSG00000020444	Guk1	TRUE	0.277646	0.136371	2.03597	0.0417536	0.367527	376.337	441.658	420.014	461.424	498.401	541.233
ENSMUSG00000078429	Ctdsp2	TRUE	0.164241	0.0807265	2.03454	0.041897	0.368568	3768.52	3536.69	3750.99	4349.75	3974.67	4065.26
ENSMUSG00000022283	Pabpc1	TRUE	0.184707	0.0907986	2.03425	0.0419259	0.368603	23191.6	23321.2	23568	28001.5	27758.1	23894.4
ENSMUSG00000043518	Rai2	TRUE	-0.64539	0.317661	-2.03169	0.0421849	0.370493	142.286	95.1922	153.737	90.4528	102.187	57.1301
ENSMUSG00000040928	S100pbp	TRUE	0.174609	0.0859616	2.03125	0.04223	0.370493	1404.3	1384.15	1405.74	1494.19	1607.03	1630.71
ENSMUSG00000071415	Rpl23	TRUE	0.156249	0.0769237	2.03121	0.0422332	0.370493	3424.15	3280.27	3565.1	3867.72	3703.78	3871.82
ENSMUSG00000020152	Actr2	TRUE	-0.178335	0.0878209	-2.03066	0.0422891	0.370493	12189.2	12511.3	12337.2	11487.5	11324.4	9920.59
ENSMUSG00000034520	Gjc1	TRUE	0.381309	0.187777	2.03065	0.0422904	0.370493	345.405	361.902	307.474	479.744	342.229	501.141
ENSMUSG00000021466	Ptch1	TRUE	-0.561904	0.27672	-2.03059	0.0422966	0.370493	1407.4	1258.08	1892.07	920.558	669.033	1497.41
ENSMUSG00000020961	Ston2	TRUE	-0.666947	0.328562	-2.0299	0.0423666	0.370493	447.48	501.689	727.489	539.282	211.121	306.698
ENSMUSG00000046312	AI464131	TRUE	0.273638	0.134811	2.02979	0.0423776	0.370493	351.591	393.633	370.778	485.468	412.603	453.032
ENSMUSG00000002845	Tmem39a	TRUE	0.208495	0.10272	2.02974	0.0423834	0.370493	1295.01	1097.71	1195.73	1414.04	1378.56	1352.08
ENSMUSG00000028944	Prkag2	TRUE	-0.281682	0.138792	-2.02953	0.0424044	0.370493	858.873	844.724	922.423	801.481	607.336	752.714
ENSMUSG00000020171	Yeats4	TRUE	0.281103	0.138515	2.0294	0.0424175	0.370493	594.922	507.692	460.207	661.794	624.688	612.395
ENSMUSG00000071722	Spin4	TRUE	0.416029	0.205061	2.02881	0.0424775	0.370641	115.479	133.784	160.771	169.456	191.841	185.422
ENSMUSG00000039099	Wdr93	TRUE	1.43075	0.705238	2.02874	0.0424848	0.370641	7.21742	4.28794	10.0482	16.0296	11.5683	30.0685
ENSMUSG00000035596	Mboat7	TRUE	0.202674	0.0999268	2.02822	0.0425375	0.370882	1225.93	1252.94	1186.69	1286.95	1450.86	1479.37
ENSMUSG00000025085	Ablim1	TRUE	0.599007	0.295607	2.02636	0.0427275	0.372318	237.144	123.493	191.92	273.648	207.265	354.808
ENSMUSG00000028389	Zfp37	TRUE	0.284882	0.140606	2.0261	0.0427546	0.372334	245.392	257.276	241.156	309.143	289.207	308.703
ENSMUSG00000024777	Ppp2r5b	TRUE	0.235692	0.116365	2.02546	0.0428198	0.372529	867.122	863.591	935.486	1109.48	1098.02	932.123
ENSMUSG00000024958	Gpr137	TRUE	0.243518	0.120233	2.02539	0.0428276	0.372529	505.219	438.227	486.332	555.312	552.386	583.328
ENSMUSG00000037395	Rcor3	TRUE	0.236661	0.116863	2.02512	0.0428552	0.372549	740.301	791.553	865.149	920.558	1014.15	889.025
ENSMUSG00000017652	Cd40	TRUE	-0.865021	0.427205	-2.02484	0.0428839	0.372579	42.2735	57.4584	39.1879	24.0444	17.3524	35.0799
ENSMUSG00000056919	4922501C03Rik	TRUE	0.240831	0.119082	2.02239	0.0431358	0.374547	465.008	467.385	463.221	515.238	539.854	593.351
ENSMUSG00000021375	Kif13a	TRUE	0.212724	0.105231	2.0215	0.0432277	0.374945	1137.26	1095.14	979.698	1248.02	1289.87	1184.7
ENSMUSG00000065475	Mir27b	FALSE	-2.02062	0.999586	-2.02146	0.0432326	0.374945	16.497	12.0062	5.02409	2.28995	0.964025	5.01141
ENSMUSG00000028121	Bcar3	TRUE	0.338516	0.167496	2.02104	0.0432757	0.375099	1016.63	975.077	759.643	977.807	1168.4	1332.03
ENSMUSG00000029660	Tex26	TRUE	1.38505	0.686078	2.0188	0.0435081	0.376891	4.12424	6.00311	6.02891	14.8846	14.4604	13.0297
ENSMUSG00000030042	Pole4	TRUE	0.256931	0.127308	2.01818	0.0435725	0.377227	501.095	537.707	450.159	624.01	595.767	561.278
ENSMUSG00000028020	Glrb	TRUE	0.526437	0.261005	2.01696	0.0436995	0.378029	112.386	121.777	163.785	167.166	160.992	244.557
ENSMUSG00000035232	Pdk3	TRUE	0.200838	0.0995826	2.0168	0.0437164	0.378029	1510.5	1280.38	1412.77	1615.56	1607.03	1606.66
ENSMUSG00000059923	Grb2	TRUE	-0.161564	0.0801523	-2.01571	0.0438302	0.37879	2200.28	2122.53	2116.15	1949.89	1968.54	1838.19
ENSMUSG00000001506	Col1a1	TRUE	0.306108	0.151906	2.01512	0.043892	0.379102	489831	484865	664883	708238	592416	726469
ENSMUSG00000025492	Ifitm3	TRUE	-0.166541	0.0826671	-2.0146	0.0439467	0.379291	5516.17	5254.44	5919.39	4799.73	5018.71	5049.5
ENSMUSG00000030029	Lrig1	TRUE	0.395195	0.196183	2.01442	0.0439654	0.379291	321.691	315.592	295.417	328.607	513.825	382.872
ENSMUSG00000061028	Clasrp	TRUE	0.25114	0.124939	2.0101	0.0444208	0.38266	537.182	517.983	467.241	652.634	583.235	577.315
ENSMUSG00000049940	Pgrmc2	TRUE	0.163174	0.0811913	2.00974	0.0444582	0.38266	1971.39	1820.66	1868.96	2067.82	2116.03	2152.9
ENSMUSG00000007038	Neu1	TRUE	-0.248699	0.123753	-2.00963	0.04447	0.38266	596.984	538.565	533.559	463.714	441.523	499.137
ENSMUSG00000086968	4933431E20Rik	FALSE	0.321614	0.160044	2.00953	0.0444814	0.38266	216.523	206.679	249.195	264.489	296.92	277.632
ENSMUSG00000030811	Fbxl19	TRUE	0.257469	0.128133	2.00938	0.0444966	0.38266	690.81	632.9	639.065	722.478	739.407	883.011
ENSMUSG00000025732	Fam195a	TRUE	0.724384	0.360526	2.00924	0.0445117	0.38266	34.025	26.5852	24.1156	51.5238	45.3092	43.0982
ENSMUSG00000031373	Car5b	TRUE	-0.338591	0.168571	-2.00859	0.0445802	0.382921	348.498	278.716	328.576	273.648	257.395	224.511
ENSMUSG00000071984	Fndc1	TRUE	0.637183	0.317249	2.00846	0.044594	0.382921	332.001	373.051	796.821	913.688	612.156	809.844
ENSMUSG00000004655	Aqp1	TRUE	0.405021	0.20169	2.00814	0.0446284	0.382993	3172.57	3118.19	2358.31	4974.91	3468.56	3010.86
ENSMUSG00000051853	Arf3	TRUE	-0.188816	0.0940686	-2.00721	0.0447273	0.383618	5955.4	6292.12	6432.85	5866.84	5533.5	4990.37
ENSMUSG00000024672	Ms4a7	TRUE	-0.839116	0.418121	-2.00688	0.0447628	0.383669	306.225	191.242	610.93	273.648	222.69	123.281
ENSMUSG00000039405	Prss23	TRUE	-0.159084	0.079278	-2.00667	0.0447853	0.383669	10426.1	9942.01	9575.92	9054.44	9281.63	8481.32
ENSMUSG00000011837	Snapc2	TRUE	0.294391	0.146734	2.00628	0.0448259	0.383794	343.343	335.317	369.773	415.625	386.574	483.1
ENSMUSG00000030407	Qpctl	TRUE	-0.234942	0.117123	-2.00594	0.0448625	0.383858	593.891	585.732	661.171	507.223	543.71	512.166
ENSMUSG00000029163	Emilin1	TRUE	-0.258586	0.128924	-2.00573	0.0448855	0.383858	7374.14	8149.65	8869.53	6006.53	6587.18	7795.75
ENSMUSG00000025915	Sgk3	TRUE	-0.301642	0.150497	-2.00431	0.0450373	0.384933	469.132	485.395	435.086	414.48	393.322	320.73
ENSMUSG00000030930	Chst15	TRUE	0.387709	0.193623	2.00239	0.0452425	0.386463	840.314	683.497	581.79	1102.61	750.011	903.057
ENSMUSG00000074063	Osgin1	TRUE	-0.484176	0.24183	-2.00213	0.0452705	0.386478	134.038	189.527	174.838	97.3227	119.539	139.317
ENSMUSG00000006442	Srm	TRUE	0.210585	0.105229	2.00121	0.0453698	0.387101	1328.01	1204.05	1347.46	1491.9	1603.17	1392.17
ENSMUSG00000007610	Gtpbp3	TRUE	0.291135	0.145541	2.00036	0.0454609	0.387654	284.573	255.561	270.296	312.578	319.092	358.817
ENSMUSG00000025742	Prps2	TRUE	-0.207032	0.103552	-1.99931	0.0455743	0.388397	990.849	1008.52	1038.98	859.874	946.672	824.879
ENSMUSG00000058761	Rnf169	TRUE	-0.310873	0.155538	-1.99869	0.0456418	0.38869	1844.57	1624.27	1437.9	1564.03	1223.35	1169.66
ENSMUSG00000038156	Spon1	TRUE	-4.28264	2.14292	-1.99851	0.0456615	0.38869	0	2.57276	19.0916	0	0	1.00228
ENSMUSG00000056145	AI504432	FALSE	-0.73155	0.366106	-1.99819	0.0456959	0.388758	71.1431	60.0311	76.3662	60.6835	31.8128	33.0753
ENSMUSG00000032436	Cmtm7	TRUE	0.211932	0.106086	1.99774	0.0457449	0.388951	915.581	927.052	970.655	1001.85	1172.25	1082.47
ENSMUSG00000030189	Ybx3	TRUE	0.203803	0.102091	1.9963	0.0459013	0.390055	3549.94	3596.72	3487.73	4376.09	4258.1	3615.23
ENSMUSG00000028782	Bai2	TRUE	0.954693	0.478416	1.99553	0.0459854	0.390544	19.5901	14.579	14.0675	24.0444	27.9567	41.0936
ENSMUSG00000040943	Tet2	TRUE	-0.371929	0.18647	-1.99458	0.046089	0.391022	1129.01	990.514	759.643	874.759	650.717	700.596
ENSMUSG00000032232	Cgnl1	TRUE	-0.409314	0.205231	-1.99441	0.0461075	0.391022	1280.58	1454.47	1356.51	863.309	826.169	1391.17
ENSMUSG00000037709	Fam13a	TRUE	-0.461145	0.231233	-1.99428	0.0461212	0.391022	146.411	155.223	154.742	84.728	114.719	131.299
ENSMUSG00000045730	Adrb2	TRUE	-0.587927	0.294953	-1.99329	0.0462297	0.391539	93.8265	131.211	168.81	83.583	103.151	75.1712
ENSMUSG00000026421	Csrp1	TRUE	-0.28233	0.141644	-1.99323	0.0462363	0.391539	15348.4	15817.3	16705.1	14185.1	10449.1	14729.5
ENSMUSG00000031465	Angpt2	TRUE	1.83603	0.921242	1.993	0.0462619	0.391539	49.4909	32.5883	82.3951	57.2486	93.5104	435.993
ENSMUSG00000046229	Scand1	TRUE	0.950545	0.477106	1.99232	0.0463365	0.391945	86.609	48.0249	21.1012	87.0179	127.251	86.1963
ENSMUSG00000037960	1110007C09Rik	TRUE	-0.227304	0.114105	-1.99206	0.0463647	0.391958	699.059	767.541	671.219	627.445	618.904	581.324
ENSMUSG00000029596	Sdsl	TRUE	0.651166	0.326939	1.9917	0.0464035	0.392062	37.1182	34.3035	32.1542	52.6687	61.6976	48.1096
ENSMUSG00000022425	Enpp2	TRUE	-0.815415	0.409557	-1.99097	0.0464844	0.392099	219.616	102.911	349.677	161.441	100.259	120.274
ENSMUSG00000025630	Hprt	TRUE	-0.177893	0.0893522	-1.99092	0.0464901	0.392099	3673.67	3512.68	3776.11	3465.83	3189.96	3035.91
ENSMUSG00000046516	Cox17	TRUE	-0.491268	0.24676	-1.99088	0.0464942	0.392099	205.181	219.542	153.737	171.746	114.719	126.288
ENSMUSG00000010453	Kansl3	TRUE	0.233178	0.117134	1.9907	0.0465144	0.392099	1321.82	1417.59	1226.88	1730.05	1479.78	1455.31
ENSMUSG00000061455	Stx17	TRUE	0.208688	0.104887	1.98965	0.0466296	0.392846	862.997	891.891	924.433	1051.08	1093.2	952.168
ENSMUSG00000021871	Pnp	TRUE	-0.218215	0.109742	-1.98843	0.0467642	0.393754	905.271	959.641	1045.01	823.235	798.213	880.004
ENSMUSG00000037224	Zfyve28	TRUE	-0.702107	0.353165	-1.98804	0.046807	0.393765	54.6462	67.7494	43.2072	34.3492	37.597	30.0685
ENSMUSG00000048234	Rnf149	TRUE	-0.195479	0.0983325	-1.98793	0.0468189	0.393765	1126.95	1089.14	1012.86	909.108	970.773	939.139
ENSMUSG00000025151	Maged1	TRUE	0.154756	0.0778862	1.98694	0.0469286	0.394462	13772.9	13898.9	13239.5	14335.1	15165.1	16042.5
ENSMUSG00000020689	Itgb3	TRUE	0.644187	0.324267	1.9866	0.0469671	0.394561	727.928	1109.72	859.12	911.398	1009.33	2294.22
ENSMUSG00000021831	Ero1l	TRUE	0.249767	0.125786	1.98564	0.0470728	0.395016	3375.69	3708.21	4351.87	4947.43	4232.07	4419.06
ENSMUSG00000044813	Shb	TRUE	-0.483284	0.243391	-1.98563	0.0470749	0.395016	201.057	205.821	212.017	199.225	120.503	124.283
ENSMUSG00000002546	Golga2	TRUE	0.155631	0.078401	1.98507	0.0471371	0.395313	2578.68	2761.43	2543.2	2965.48	2875.69	2942.7
ENSMUSG00000016024	Lbp	TRUE	0.882881	0.444898	1.98446	0.0472049	0.395657	353.654	145.79	159.766	171.746	556.242	486.107
ENSMUSG00000020601	Trib2	TRUE	0.36933	0.186289	1.98256	0.0474164	0.397203	1964.17	1518.79	1328.37	1670.52	2164.24	2378.42
ENSMUSG00000024941	Scyl1	TRUE	0.169976	0.085758	1.98204	0.0474744	0.397463	2111.61	1916.71	1948.34	2167.43	2281.85	2272.17
ENSMUSG00000070709	1700049G17Rik	TRUE	0.488312	0.246485	1.9811	0.0475797	0.397933	127.851	86.6163	107.516	135.107	137.856	177.404
ENSMUSG00000028158	Mttp	TRUE	0.400616	0.202223	1.98106	0.0475846	0.397933	148.473	121.777	132.636	163.731	202.445	164.374
ENSMUSG00000034875	Nudt19	TRUE	0.22057	0.111437	1.97932	0.0477802	0.399181	467.07	492.255	465.231	534.702	561.062	564.285
ENSMUSG00000047757	Fancb	TRUE	0.415011	0.209686	1.9792	0.0477935	0.399181	126.82	120.92	107.516	138.542	154.244	180.411
ENSMUSG00000028478	Clta	TRUE	0.289278	0.146195	1.97872	0.0478473	0.399181	3702.54	2936.38	2785.36	3477.28	4348.72	3688.4
ENSMUSG00000034118	Tpst1	TRUE	0.262938	0.132916	1.97822	0.0479038	0.399181	439.232	423.648	507.433	525.542	533.106	584.331
ENSMUSG00000037148	Arhgap10	TRUE	-0.254838	0.128836	-1.978	0.0479283	0.399181	822.786	1023.96	1038.98	822.09	810.745	786.792
ENSMUSG00000000631	Myo18a	TRUE	-0.284452	0.143818	-1.97786	0.0479444	0.399181	2972.55	3106.18	3908.74	2538.4	3092.59	2567.85
ENSMUSG00000030653	Pde2a	TRUE	0.535864	0.270959	1.97766	0.0479676	0.399181	992.911	880.742	846.057	799.191	1224.31	1918.37
ENSMUSG00000020644	Id2	TRUE	-0.368736	0.186458	-1.97759	0.0479754	0.399181	2593.12	2697.11	1673.02	1929.28	1827.79	1636.73
ENSMUSG00000036053	Fmnl2	TRUE	-0.314788	0.15918	-1.97757	0.0479776	0.399181	1446.58	1221.2	1777.52	1306.41	1135.62	1131.58
ENSMUSG00000040560	Wdr7	TRUE	-0.178516	0.0902963	-1.977	0.0480419	0.399449	1398.12	1487.06	1564.5	1305.27	1321.68	1304.97
ENSMUSG00000032940	Rbm11	TRUE	2.0657	1.04508	1.97659	0.0480879	0.399449	1.03106	2.57276	2.00964	9.15978	9.64025	5.01141
ENSMUSG00000045506	A930002H24Rik	TRUE	1.13444	0.573947	1.97656	0.0480911	0.399449	11.3417	12.8638	6.02891	18.3196	21.2085	27.0616
ENSMUSG00000026335	Pam	TRUE	-0.176666	0.0894053	-1.97601	0.0481531	0.399739	9761.05	10417.1	11277.1	8978.88	9721.23	9128.79
ENSMUSG00000038859	Baiap2l1	TRUE	0.432347	0.218837	1.97566	0.0481933	0.399786	226.833	290.722	232.113	326.317	420.315	265.605
ENSMUSG00000061119	Prcp	TRUE	0.36009	0.182289	1.97537	0.0482257	0.399786	1517.72	1387.58	1295.21	2158.27	1902.98	1331.03
ENSMUSG00000031558	Slit2	TRUE	-0.26014	0.1317	-1.97525	0.0482402	0.399786	3232.37	2539.32	2469.84	2405.59	2312.7	2162.93
ENSMUSG00000027670	Ocstamp	TRUE	-4.75848	2.40945	-1.97493	0.0482766	0.399863	10.3106	5.14553	0	0	0	0
ENSMUSG00000005611	Mrvi1	TRUE	0.788237	0.399172	1.97468	0.0483046	0.39987	146.411	242.697	101.487	264.489	161.956	421.961
ENSMUSG00000033446	Lpar6	TRUE	-0.291506	0.147666	-1.97409	0.0483711	0.400196	408.3	437.37	384.846	298.838	372.114	333.76
ENSMUSG00000017686	Rhot1	TRUE	0.153742	0.0778901	1.97383	0.0484014	0.400221	1613.61	1587.39	1659.96	1789.59	1826.83	1790.08
ENSMUSG00000031093	Dock11	TRUE	-0.185713	0.0941033	-1.9735	0.0484388	0.400306	1365.12	1386.72	1338.42	1283.51	1176.11	1138.59
ENSMUSG00000052914	Cyp2j6	TRUE	0.240885	0.122086	1.97307	0.0484878	0.400486	440.263	463.097	414.99	488.903	542.746	526.198
ENSMUSG00000044708	Kcnj10	TRUE	-1.31157	0.664896	-1.9726	0.048541	0.400693	16.497	36.8763	24.1156	5.72486	18.3165	7.01598
ENSMUSG00000028708	Mknk1	TRUE	-0.265139	0.134427	-1.97237	0.0485679	0.400693	793.916	837.006	1004.82	782.016	691.206	720.641
ENSMUSG00000042302	Ehbp1	TRUE	0.213593	0.108306	1.97213	0.0485944	0.400693	1097.05	1067.7	997.785	1142.68	1189.61	1334.04
ENSMUSG00000031937	Vstm5	TRUE	0.789109	0.400295	1.97132	0.0486876	0.40118	34.025	18.0093	33.159	56.1037	43.3811	47.1073
ENSMUSG00000051682	Treml4	TRUE	-1.8445	0.935754	-1.97114	0.0487079	0.40118	19.5901	15.4366	5.02409	2.28995	6.74817	2.00457
ENSMUSG00000032340	Neo1	TRUE	0.208182	0.105657	1.97036	0.0487971	0.40169	6448.25	6821.25	6299.21	7644.98	6689.37	8273.84
ENSMUSG00000023791	Pigx	TRUE	0.355803	0.180819	1.96773	0.0490993	0.403952	289.728	269.283	285.368	364.101	424.171	291.664
ENSMUSG00000019210	Atp6v1e1	TRUE	-0.177355	0.0901494	-1.96735	0.0491428	0.40405	1861.06	1852.39	2007.63	1724.33	1739.1	1595.63
ENSMUSG00000087370	Tmem170b	TRUE	-0.385953	0.196199	-1.96715	0.049166	0.40405	814.537	584.875	504.419	519.818	456.948	480.093
ENSMUSG00000009681	Bcr	TRUE	0.351574	0.178769	1.96664	0.0492248	0.404308	711.431	720.374	578.775	681.259	1015.12	867.977
ENSMUSG00000051518	Rps19bp1	TRUE	0.394473	0.200629	1.96618	0.0492777	0.404517	239.206	165.514	214.026	248.459	259.323	303.692
ENSMUSG00000053475	Tnfaip6	TRUE	-0.785637	0.399746	-1.96534	0.0493752	0.405091	293.852	153.508	90.4337	96.1777	100.259	115.263
ENSMUSG00000029270	Fam69a	TRUE	-0.290095	0.14766	-1.96462	0.0494583	0.405547	693.903	717.801	793.807	514.093	596.731	691.575
ENSMUSG00000027634	Ndrg3	TRUE	-0.227599	0.115869	-1.96428	0.0494979	0.405646	1203.25	1265.8	1420.81	1035.06	1089.35	1196.73
ENSMUSG00000023945	Slc5a7	TRUE	1.0674	0.543559	1.96372	0.0495627	0.405826	55.6772	30.8732	33.159	33.2042	146.532	70.1598
ENSMUSG00000061859	Inadl	TRUE	0.382788	0.194941	1.96361	0.049575	0.405826	230.957	219.542	181.872	266.779	321.984	235.536
ENSMUSG00000021298	Gpr132	TRUE	-1.23565	0.62955	-1.96275	0.0496757	0.406425	14.4348	24.0125	15.0723	9.15978	6.74817	7.01598
ENSMUSG00000042258	Isl1	TRUE	-5.3934	2.74986	-1.96134	0.0498398	0.407541	0	2.57276	180.867	3.43492	0.964025	0
ENSMUSG00000053460	Ggcx	TRUE	0.20416	0.104151	1.96023	0.0499688	0.408369	1424.93	1486.2	1601.68	1613.27	1714.04	1870.26
ENSMUSG00000073412	Lst1	TRUE	-0.722471	0.368645	-1.9598	0.0500193	0.40848	44.3356	39.449	42.2024	24.0444	23.1366	29.0662
ENSMUSG00000019977	Hbs1l	TRUE	0.166531	0.0849801	1.95964	0.0500378	0.40848	1431.11	1549.66	1545.41	1726.62	1680.3	1674.81
ENSMUSG00000054256	Msi1	TRUE	0.588115	0.300248	1.95876	0.0501405	0.40881	137.131	170.66	115.554	254.184	133.035	250.571
ENSMUSG00000043953	Ccrl2	TRUE	-1.47974	0.755501	-1.95862	0.050157	0.40881	9.27954	16.2942	18.0867	8.01481	4.82012	3.00685
ENSMUSG00000034949	Zfr2	TRUE	0.463397	0.236598	1.95859	0.0501614	0.40881	105.168	76.3253	104.501	139.687	118.575	135.308
ENSMUSG00000038712	Fam63a	TRUE	-0.19674	0.100467	-1.95825	0.0502007	0.408904	947.544	888.461	850.076	794.611	767.364	781.78
ENSMUSG00000071552	Tigit	TRUE	-2.14815	1.09795	-1.95651	0.0504055	0.410143	4.12424	12.0062	12.0578	4.57989	0.964025	1.00228
ENSMUSG00000073888	Ccl27a	TRUE	0.992321	0.507197	1.95648	0.0504085	0.410143	14.4348	12.0062	10.0482	26.3344	20.2445	26.0593
ENSMUSG00000026281	Dtymk	TRUE	0.250865	0.128251	1.95604	0.05046	0.410336	640.288	569.438	518.486	646.91	704.702	703.602
ENSMUSG00000029648	Flt1	TRUE	-1.57491	0.805358	-1.95554	0.0505194	0.410592	16.497	13.7214	23.1108	10.3048	6.74817	1.00228
ENSMUSG00000025427	Rnf165	TRUE	1.37783	0.705182	1.95387	0.0507171	0.411846	12.3727	14.579	10.0482	60.6835	26.0287	10.0228
ENSMUSG00000039043	2610034B18Rik	TRUE	0.233176	0.119347	1.95376	0.0507296	0.411846	679.469	806.132	728.493	911.398	808.817	885.016
ENSMUSG00000001349	Cnn1	TRUE	-0.258294	0.132349	-1.95161	0.0509847	0.413511	7938.13	10950.5	9924.59	8451.04	7835.59	7805.78
ENSMUSG00000016534	Lamp2	TRUE	-0.199142	0.102043	-1.95156	0.0509907	0.413511	14994.7	14897.2	17810.4	14100.3	14234.8	13216.1
ENSMUSG00000046844	Vat1l	TRUE	1.68425	0.863188	1.9512	0.0510334	0.413629	3.09318	20.5821	13.0626	38.9291	7.7122	72.1643
ENSMUSG00000036103	Colec12	TRUE	-0.272229	0.13957	-1.95048	0.0511195	0.414099	8614.51	9412.88	10032.1	6552.68	7541.57	9138.81
ENSMUSG00000019278	Dpep1	TRUE	0.409337	0.209933	1.94984	0.0511951	0.414483	2362.16	2525.6	2719.04	2232.7	3758.73	4109.36
ENSMUSG00000068874	Selenbp1	TRUE	0.433866	0.222667	1.94849	0.051356	0.415557	233.02	247.843	215.031	241.589	293.064	404.922
ENSMUSG00000028957	Per3	TRUE	-0.262346	0.134762	-1.94674	0.0515661	0.417029	677.406	644.048	713.421	533.557	517.681	644.468
ENSMUSG00000025510	Cd151	TRUE	-0.265924	0.13669	-1.94545	0.051721	0.417906	3121.02	3890.87	4081.57	2885.33	3433.86	2906.62
ENSMUSG00000048834	Vstm2a	TRUE	3.76616	1.93597	1.94536	0.0517313	0.417906	0	0	2.00964	0	7.7122	19.0434
ENSMUSG00000054910	4931415C17Rik	FALSE	2.14691	1.10379	1.94503	0.0517716	0.41795	1.03106	0.857588	4.01927	8.01481	4.82012	13.0297
ENSMUSG00000020733	Slc9a3r1	TRUE	-0.317993	0.163516	-1.94472	0.0518088	0.41795	573.269	535.135	419.009	437.38	409.711	378.863
ENSMUSG00000046610	Oacyl	TRUE	1.80893	0.930225	1.94461	0.0518219	0.41795	8.24848	4.28794	1.00482	5.72486	17.3524	24.0548
ENSMUSG00000032754	Slc24a6	TRUE	-0.300185	0.154407	-1.94412	0.0518811	0.418199	388.71	345.608	328.576	314.867	289.207	259.591
ENSMUSG00000014164	Klhl3	TRUE	-0.60573	0.311674	-1.94348	0.0519587	0.418595	60.8325	82.3284	64.3084	38.9291	44.3451	53.121
ENSMUSG00000019558	Slc6a8	TRUE	-0.20156	0.103765	-1.94247	0.0520805	0.419142	1762.08	1894.41	1829.77	1757.53	1505.81	1510.44
ENSMUSG00000036430	Tbcc	TRUE	0.365886	0.188374	1.94234	0.0520963	0.419142	230.957	218.685	186.896	271.359	315.236	233.532
ENSMUSG00000031555	Adam9	TRUE	-0.227472	0.117131	-1.94204	0.0521326	0.419142	7510.24	8638.48	9173.99	6833.2	7996.59	6798.48
ENSMUSG00000081126	Gm15784	FALSE	-1.74068	0.896424	-1.9418	0.0521614	0.419142	9.27954	9.43346	9.04337	3.43492	1.92805	3.00685
ENSMUSG00000035069	Oma1	TRUE	-0.288966	0.148818	-1.94174	0.0521687	0.419142	338.188	385.057	393.889	274.793	313.308	325.742
ENSMUSG00000020484	Xbp1	TRUE	0.217605	0.112093	1.94128	0.0522238	0.419356	3160.2	2920.09	2947.13	3362.78	3179.35	3954
ENSMUSG00000036438	Calm2	TRUE	-0.178235	0.091838	-1.94076	0.0522878	0.419641	6995.74	7949.84	7694.9	6756.48	6994.96	6259.25
ENSMUSG00000030199	Etv6	TRUE	-0.236405	0.121935	-1.93878	0.0525286	0.421212	1674.44	2071.93	1834.8	1507.93	1503.88	1726.93
ENSMUSG00000034591	Slc41a2	TRUE	-0.32055	0.165345	-1.93868	0.0525407	0.421212	1765.17	1999.04	2244.76	1965.92	1457.61	1390.17
ENSMUSG00000022867	Usp25	TRUE	-0.149014	0.0769088	-1.93754	0.0526798	0.421985	2443.61	2402.1	2486.93	2135.37	2282.81	2192.99
ENSMUSG00000010142	Tnfrsf13b	TRUE	-0.519169	0.26797	-1.93742	0.0526945	0.421985	107.23	95.1922	77.371	57.2486	67.4817	70.1598
ENSMUSG00000097971	RP23-81C12.1	FALSE	0.799029	0.412593	1.9366	0.0527938	0.422476	20328.4	13593.6	9409.12	24457.8	33390.9	17544
ENSMUSG00000053004	Hrh1	TRUE	-1.47773	0.763112	-1.93645	0.0528131	0.422476	11.3417	22.2973	9.04337	4.57989	5.78415	5.01141
ENSMUSG00000022565	Plec	TRUE	0.257917	0.133265	1.93538	0.0529443	0.423296	27438.6	26311.6	21801.5	34440.8	28610.3	27292.2
ENSMUSG00000021991	Cacna2d3	TRUE	-0.960652	0.496557	-1.93463	0.0530363	0.423801	36.0871	27.4428	60.2891	27.4793	22.1726	14.032
ENSMUSG00000023272	Creld2	TRUE	0.314643	0.162675	1.93419	0.0530904	0.424003	878.463	810.42	812.898	807.206	1141.41	1160.64
ENSMUSG00000019831	Wasf1	TRUE	-0.42606	0.22036	-1.93347	0.0531778	0.424472	159.814	190.384	154.742	120.222	148.46	107.244
ENSMUSG00000049439	Cyp20a1	TRUE	0.210548	0.108942	1.93267	0.0532769	0.424774	1998.19	2010.19	2228.69	2654.05	2350.29	2214.04
ENSMUSG00000031079	Zfp300	TRUE	0.705409	0.365049	1.93237	0.0533143	0.424774	31.9629	24.0125	38.1831	51.5238	43.3811	58.1324
ENSMUSG00000026068	Il18rap	TRUE	-0.897253	0.464338	-1.93233	0.0533193	0.424774	247.454	198.96	106.511	60.6835	173.524	62.1415
ENSMUSG00000052942	Glis3	TRUE	-0.206868	0.107062	-1.93223	0.053331	0.424774	2017.78	1992.18	2199.55	1672.81	1979.14	1725.93
ENSMUSG00000031930	Wwp2	TRUE	0.301516	0.156108	1.93146	0.0534268	0.425307	2414.74	2581.34	2238.74	3661.62	2530.57	2727.21
ENSMUSG00000035203	Epn1	TRUE	-0.213354	0.110518	-1.93048	0.0535471	0.425989	2307.51	2488.72	2088.01	1905.23	1887.56	2145.89
ENSMUSG00000021294	Kif26a	TRUE	1.38025	0.715045	1.9303	0.0535703	0.425989	8.24848	4.28794	6.02891	21.7545	17.3524	9.02054
ENSMUSG00000024304	Cdh2	TRUE	-0.255139	0.132278	-1.92881	0.0537542	0.427084	3630.36	3727.08	4484.51	3679.94	2917.14	3326.58
ENSMUSG00000002012	Pnck	TRUE	-0.635416	0.32945	-1.92872	0.0537659	0.427084	114.448	114.059	221.06	109.917	99.2946	80.1826
ENSMUSG00000054008	Ndst1	TRUE	-0.144151	0.0748104	-1.92689	0.0539935	0.428661	3598.4	3342.02	3532.94	3129.21	3215.02	3131.13
ENSMUSG00000071054	Safb	TRUE	0.190207	0.0987644	1.92587	0.0541205	0.429438	1509.47	1440.75	1406.75	1774.71	1665.83	1531.49
ENSMUSG00000029287	Tgfbr3	TRUE	-0.476503	0.2477	-1.92371	0.0543909	0.431351	3002.45	2474.14	2771.29	1159.86	2414.88	2351.36
ENSMUSG00000044337	Cxcr7	TRUE	-0.666791	0.346708	-1.9232	0.0544545	0.431453	180.436	237.552	481.308	214.11	186.057	166.379
ENSMUSG00000042284	Itga1	TRUE	-0.356131	0.185197	-1.92299	0.0544816	0.431453	1178.5	1273.52	1836.81	1024.75	1090.31	1234.81
ENSMUSG00000020732	Rab37	TRUE	1.00297	0.521659	1.92266	0.0545233	0.431453	11.3417	11.1486	22.106	22.8995	28.9207	37.0845
ENSMUSG00000003531	Dgcr6	TRUE	0.295447	0.153689	1.92238	0.0545585	0.431453	251.579	240.982	212.017	288.533	274.747	301.687
ENSMUSG00000034023	Fancd2	TRUE	0.39066	0.203233	1.92222	0.0545775	0.431453	189.715	173.233	133.641	214.11	199.553	237.541
ENSMUSG00000052760	A630001G21Rik	TRUE	-0.376269	0.195748	-1.92221	0.0545795	0.431453	187.653	211.824	195.94	178.616	131.107	150.342
ENSMUSG00000029484	Anxa3	TRUE	-0.286453	0.14909	-1.92135	0.0546877	0.432077	6097.69	7738.01	7321.11	4780.26	6541.87	6023.72
ENSMUSG00000056612	Ppp1r14b	TRUE	0.254629	0.132566	1.92077	0.0547608	0.432413	460.884	412.5	424.033	526.687	554.314	466.061
ENSMUSG00000030966	Trim21	TRUE	-0.355559	0.185135	-1.92054	0.0547896	0.432413	205.181	204.106	246.181	169.456	154.244	188.429
ENSMUSG00000020225	Tmbim4	TRUE	-0.208868	0.108787	-1.91997	0.0548616	0.432413	936.203	1033.39	1075.16	869.034	837.738	928.114
ENSMUSG00000027496	Aurka	TRUE	0.350623	0.182623	1.91993	0.0548666	0.432413	423.766	443.373	398.913	414.48	634.328	564.285
ENSMUSG00000010476	Ebf3	TRUE	-0.35158	0.183129	-1.91985	0.054877	0.432413	1031.06	854.157	894.289	545.007	820.385	810.847
ENSMUSG00000097451	Rian	FALSE	1.74999	0.912142	1.91855	0.0550411	0.433383	175.28	1722.04	420.014	1446.1	3436.75	2912.63
ENSMUSG00000024084	Qpct	TRUE	-0.377184	0.196613	-1.91841	0.0550589	0.433383	477.381	421.933	533.559	353.797	294.992	454.034
ENSMUSG00000033676	Gabrb3	TRUE	-1.84619	0.962791	-1.91754	0.0551694	0.434021	22.6833	9.43346	131.631	32.0592	8.67622	5.01141
ENSMUSG00000073176	Zfp449	TRUE	0.294011	0.153408	1.91653	0.0552973	0.434552	353.654	379.911	404.942	416.77	535.998	442.007
ENSMUSG00000097925	AC140461.1	FALSE	-1.45337	0.758366	-1.91646	0.0553071	0.434552	16.497	12.8638	10.0482	4.57989	6.74817	3.00685
ENSMUSG00000071037	Camkmt	TRUE	0.663401	0.346212	1.91617	0.0553436	0.434552	54.6462	34.3035	44.212	51.5238	80.9781	77.1758
ENSMUSG00000048368	Omd	TRUE	-0.259621	0.135506	-1.91594	0.055373	0.434552	7425.69	8376.06	10070.3	7743.45	6564.04	7304.64
ENSMUSG00000032661	Oas3	TRUE	-0.451644	0.235741	-1.91585	0.0553843	0.434552	139.193	142.36	176.848	96.1777	134.963	103.235
ENSMUSG00000020315	Sptbn1	TRUE	0.231036	0.12064	1.91509	0.0554804	0.435074	17124.9	18454.4	15722.4	17428.8	22261.3	20520.7
ENSMUSG00000075000	Nrbf2	TRUE	0.395036	0.206347	1.91442	0.055566	0.435233	242.299	173.233	209.002	318.302	268.963	233.532
ENSMUSG00000028854	Slc9a1	TRUE	0.189542	0.0990146	1.91429	0.0555837	0.435233	1246.55	1244.36	1285.16	1380.84	1363.13	1561.56
ENSMUSG00000071317	Bves	TRUE	-2.525	1.31906	-1.91424	0.0555893	0.435233	214.46	76.3253	3.01446	11.4497	13.4963	26.0593
ENSMUSG00000031349	Nsdhl	TRUE	0.24147	0.126185	1.91363	0.055668	0.435618	732.053	778.69	671.219	765.987	911.967	901.052
ENSMUSG00000053706	B430305J03Rik	TRUE	-0.988954	0.516904	-1.91322	0.0557193	0.435787	56.7083	36.0187	23.1108	13.7397	18.3165	26.0593
ENSMUSG00000048546	Tob2	TRUE	0.251594	0.131539	1.9127	0.0557861	0.435973	1070.24	1034.25	995.775	1399.16	1236.84	1056.41
ENSMUSG00000031758	Cdyl2	TRUE	-0.233937	0.122315	-1.91258	0.0558022	0.435973	548.524	623.466	569.732	491.193	523.465	467.064
ENSMUSG00000018648	Dusp14	TRUE	-0.651793	0.340956	-1.91166	0.0559199	0.436348	62.8947	114.059	125.602	66.4084	73.2659	53.121
ENSMUSG00000021996	Esd	TRUE	-0.192885	0.100905	-1.91154	0.0559351	0.436348	3863.38	3998.07	3664.57	3201.34	3717.28	3164.21
ENSMUSG00000027007	Ssfa2	TRUE	-0.219999	0.115099	-1.91139	0.055955	0.436348	1701.25	1547.09	1533.35	1379.69	1225.28	1500.42
ENSMUSG00000042115	Klhdc8a	TRUE	-0.630944	0.330121	-1.91125	0.0559726	0.436348	475.319	442.515	511.453	403.03	375.97	144.329
ENSMUSG00000094483	Purb	TRUE	-0.228003	0.119308	-1.91105	0.0559983	0.436348	6295.65	5796.43	5095.43	5404.27	4745.89	4526.31
ENSMUSG00000033706	Smyd5	TRUE	0.214916	0.112504	1.91029	0.0560963	0.436713	847.531	828.43	773.71	864.454	961.133	1016.31
ENSMUSG00000064141	Zfp69	TRUE	0.76389	0.399895	1.91022	0.0561044	0.436713	24.7454	28.3004	17.0819	37.7841	38.561	43.0982
ENSMUSG00000020532	Acaca	TRUE	0.226289	0.118488	1.90981	0.056158	0.4369	776.388	728.092	731.508	775.146	905.219	933.125
ENSMUSG00000020611	Gna13	TRUE	-0.179153	0.0938451	-1.90903	0.0562584	0.43745	3139.58	3123.33	3519.88	2833.81	2765.79	3039.92
ENSMUSG00000003411	Rab3b	TRUE	-0.667119	0.349582	-1.90834	0.0563479	0.437718	225.802	484.537	310.489	138.542	197.625	306.698
ENSMUSG00000027678	Ncoa3	TRUE	-0.186742	0.0978604	-1.90825	0.0563589	0.437718	1797.14	1877.26	2029.73	1566.32	1746.81	1696.86
ENSMUSG00000030020	Prickle2	TRUE	-0.328528	0.172189	-1.90795	0.056398	0.437718	882.587	949.349	809.884	540.427	795.32	766.746
ENSMUSG00000061288	Taok3	TRUE	-0.211007	0.110613	-1.90761	0.0564416	0.437718	1648.67	1903.84	1766.47	1499.91	1671.62	1424.24
ENSMUSG00000025001	Hells	TRUE	0.248097	0.130067	1.90746	0.0564608	0.437718	596.984	552.286	513.462	626.3	726.875	620.413
ENSMUSG00000024276	Zfp397	TRUE	0.233713	0.122531	1.90738	0.0564711	0.437718	716.587	668.061	794.811	922.848	803.997	835.904
ENSMUSG00000060568	Fam78b	TRUE	-0.967921	0.507609	-1.90683	0.0565431	0.438046	25.7765	41.1642	30.1446	9.15978	21.2085	19.0434
ENSMUSG00000041117	Ccdc8	TRUE	0.390086	0.204629	1.90631	0.0566099	0.438333	616.574	782.977	966.635	903.383	930.284	1266.89
ENSMUSG00000019849	Prep	TRUE	0.1603	0.0841019	1.90602	0.0566474	0.438392	2248.74	2265.75	2063.9	2494.9	2478.51	2379.42
ENSMUSG00000035397	Klf16	TRUE	0.337747	0.1773	1.90494	0.0567873	0.439244	721.742	520.556	523.51	850.715	695.062	685.561
ENSMUSG00000020263	Appl2	TRUE	-0.352606	0.185168	-1.90425	0.0568781	0.439716	1614.64	1354.99	981.708	968.647	1018.01	1107.52
ENSMUSG00000009628	Tex15	TRUE	-0.909631	0.477757	-1.90396	0.0569154	0.439773	129.914	96.9074	189.911	48.0889	133.035	40.0913
ENSMUSG00000058835	Abi1	TRUE	-0.1402	0.073651	-1.90357	0.0569663	0.439936	3170.51	3260.55	3245.56	2952.88	3008.72	2819.42
ENSMUSG00000042712	Wbp5	TRUE	0.171589	0.0901934	1.90246	0.0571112	0.440824	2510.63	2487.86	2616.55	2915.1	3020.29	2641.01
ENSMUSG00000060935	AI597468	TRUE	0.225342	0.118467	1.90216	0.0571505	0.440897	4023.2	3746.8	3995.16	5209.63	4542.48	4003.12
ENSMUSG00000028567	Txndc12	TRUE	0.183155	0.0963572	1.90079	0.0573289	0.442042	1236.24	1282.95	1300.24	1338.47	1526.05	1470.35
ENSMUSG00000003380	Rabac1	TRUE	0.430152	0.226346	1.90042	0.0573784	0.442139	1649.7	1641.42	895.293	1972.79	1651.37	2017.59
ENSMUSG00000073616	Myeov2	TRUE	-0.204108	0.107412	-1.90024	0.0574015	0.442139	1300.17	1265.8	1505.22	1169.02	1170.33	1193.72
ENSMUSG00000037151	Lrrc20	TRUE	0.233017	0.122725	1.89868	0.057606	0.44326	478.412	529.132	490.351	581.646	547.566	632.44
ENSMUSG00000048612	Myof	TRUE	0.212043	0.11168	1.89866	0.0576097	0.44326	10448.8	10896.5	9494.53	11604.3	13321.9	10796.6
ENSMUSG00000040473	A330021E22Rik	TRUE	0.430096	0.226551	1.89845	0.0576373	0.44326	93.8265	117.49	135.651	163.731	165.812	138.315
ENSMUSG00000033209	Ttc28	TRUE	-0.231331	0.121879	-1.89804	0.0576904	0.44329	5651.24	5845.32	5527.51	5614.95	4251.35	4638.56
ENSMUSG00000085058	8030453O22Rik	FALSE	-1.75661	0.925675	-1.89765	0.0577418	0.44329	23.7144	13.7214	14.0675	1.14497	1.92805	12.0274
ENSMUSG00000035376	Ptplb	TRUE	-0.352329	0.185685	-1.89746	0.0577676	0.44329	351.591	343.893	491.356	312.578	295.956	320.73
ENSMUSG00000066152	Slc31a2	TRUE	-0.333075	0.175561	-1.89721	0.0578001	0.44329	442.325	487.967	576.766	345.782	382.718	467.064
ENSMUSG00000031274	Col4a5	TRUE	0.443142	0.233594	1.89706	0.0578199	0.44329	2376.59	2039.34	1588.62	2776.56	3524.47	1862.24
ENSMUSG00000033863	Klf9	TRUE	0.328572	0.173208	1.89698	0.0578306	0.44329	1416.68	1171.46	1081.18	1881.19	1324.57	1403.2
ENSMUSG00000006273	Atp6v1b2	TRUE	-0.179116	0.0944297	-1.89682	0.0578518	0.44329	2603.43	2356.65	2291.99	2099.88	2242.32	2061.7
ENSMUSG00000037814	Larp1b	TRUE	-0.345372	0.182218	-1.89538	0.0580426	0.444307	184.56	165.514	192.925	151.136	136.892	139.317
ENSMUSG00000030180	Kdm5a	TRUE	-0.165019	0.087065	-1.89536	0.0580449	0.444307	2892.12	2924.37	2707.99	2692.98	2465.01	2447.57
ENSMUSG00000063382	Bcl9l	TRUE	0.187963	0.0992289	1.89423	0.0581942	0.445161	3666.45	4120.71	3816.3	4032.59	4480.79	4704.71
ENSMUSG00000004500	Zfp324	TRUE	0.378393	0.199799	1.89387	0.0582424	0.445161	279.417	241.84	329.58	330.897	327.768	446.016
ENSMUSG00000017667	Zfp334	TRUE	0.282761	0.149306	1.89383	0.058247	0.445161	478.412	442.515	574.756	550.732	636.256	630.436
ENSMUSG00000036006	Fam65b	TRUE	0.501214	0.264737	1.89326	0.0583237	0.445516	335.095	404.781	279.34	328.607	654.573	459.045
ENSMUSG00000007594	Hapln4	TRUE	0.740933	0.391543	1.89234	0.0584452	0.446213	18.5591	24.87	31.1494	40.074	39.525	45.1027
ENSMUSG00000058173	Smco4	TRUE	0.320123	0.169242	1.89151	0.0585565	0.446738	236.113	222.973	204.983	290.823	298.848	239.546
ENSMUSG00000053398	Phgdh	TRUE	0.32999	0.174471	1.89137	0.0585747	0.446738	525.841	514.553	571.742	832.395	641.076	554.262
ENSMUSG00000004885	Crabp2	TRUE	-0.849838	0.449623	-1.89011	0.0587426	0.44763	76.2984	54.8856	169.814	44.6539	59.7695	62.1415
ENSMUSG00000008575	Nfib	TRUE	0.254965	0.134899	1.89004	0.0587523	0.44763	5327.49	4377.13	4598.05	5261.15	5190.31	6614.06
ENSMUSG00000055653	Gpc3	TRUE	1.99934	1.058	1.88974	0.0587926	0.447705	2.06212	1.71518	2.00964	11.4497	7.7122	4.00913
ENSMUSG00000034863	Ano8	TRUE	0.200815	0.10638	1.88772	0.0590638	0.449538	855.78	916.761	802.85	1021.32	1004.51	936.132
ENSMUSG00000032355	Mlip	TRUE	1.67171	0.886373	1.88602	0.0592928	0.451048	28.8697	13.7214	26.1253	182.051	28.9207	8.01826
ENSMUSG00000029670	Ing3	TRUE	-0.248162	0.131601	-1.88572	0.0593324	0.451059	426.859	428.794	395.899	373.261	325.84	355.81
ENSMUSG00000060402	Chst8	TRUE	-0.969518	0.514183	-1.88555	0.0593555	0.451059	43.3045	120.062	118.569	46.9439	24.1006	73.1666
ENSMUSG00000062661	Ncs1	TRUE	0.169266	0.0898209	1.88449	0.059499	0.451917	2127.08	2393.53	2225.67	2523.52	2630.82	2433.54
ENSMUSG00000024816	Frmd8	TRUE	-0.171376	0.0909575	-1.88413	0.0595476	0.452053	1594.02	1767.49	1748.38	1473.58	1501.95	1562.56
ENSMUSG00000028776	Tinagl1	TRUE	0.45001	0.239014	1.88278	0.0597309	0.452907	889.805	1261.51	962.616	1128.94	1974.32	1150.62
ENSMUSG00000024339	Tap2	TRUE	-0.385639	0.204836	-1.88267	0.0597451	0.452907	905.271	1140.59	1330.38	666.374	866.658	1050.39
ENSMUSG00000021266	Wars	TRUE	0.232675	0.123606	1.88239	0.0597827	0.452907	1693	1637.99	1899.11	2251.02	2099.65	1795.09
ENSMUSG00000015053	Gata2	TRUE	0.564945	0.300203	1.88187	0.0598534	0.452907	130.945	170.66	101.487	137.397	254.503	204.466
ENSMUSG00000049507	4930429B21Rik	TRUE	-0.291553	0.154941	-1.8817	0.0598767	0.452907	258.796	284.719	305.465	224.415	223.654	245.559
ENSMUSG00000038007	Acer2	TRUE	1.05386	0.560162	1.88134	0.0599255	0.452907	50.5219	39.449	48.2313	24.0444	138.82	123.281
ENSMUSG00000007458	M6pr	TRUE	-0.181515	0.0964899	-1.88118	0.0599474	0.452907	4098.46	4076.97	3936.88	3299.81	3920.69	3457.88
ENSMUSG00000022130	Tgds	TRUE	0.253683	0.13487	1.88094	0.0599795	0.452907	533.058	492.255	590.833	585.081	697.954	641.461
ENSMUSG00000046352	Gjb2	TRUE	1.13526	0.603582	1.88087	0.0599902	0.452907	135.069	58.316	30.1446	305.708	76.158	109.249
ENSMUSG00000047712	Ust	TRUE	-0.401497	0.213475	-1.88077	0.0600033	0.452907	252.61	220.4	285.368	231.284	188.949	154.352
ENSMUSG00000028433	Ubap2	TRUE	0.153973	0.0818696	1.88071	0.0600112	0.452907	2860.16	3029.86	2758.23	3170.43	3325.89	3127.12
ENSMUSG00000028207	Asph	TRUE	-0.193109	0.102695	-1.88041	0.0600519	0.452907	8830	9355.42	9246.34	8626.22	7061.48	8309.93
ENSMUSG00000031504	Rab20	TRUE	-0.471926	0.250977	-1.88035	0.0600598	0.452907	101.044	87.4739	112.54	64.1185	79.05	73.1666
ENSMUSG00000046556	Zfp319	TRUE	0.296298	0.157615	1.87988	0.060124	0.453159	396.958	410.784	491.356	468.294	527.322	598.363
ENSMUSG00000074676	Foxs1	TRUE	0.254303	0.135343	1.87896	0.0602504	0.453844	344.374	306.159	332.595	412.19	366.329	393.897
ENSMUSG00000021890	Eaf1	TRUE	-0.257574	0.137097	-1.87877	0.0602763	0.453844	2247.71	2149.97	1905.14	2028.89	1723.68	1521.47
ENSMUSG00000089317	Snord123	FALSE	-2.44685	1.30266	-1.87835	0.0603334	0.454041	13.4038	6.00311	4.01927	3.43492	0	1.00228
ENSMUSG00000028698	Pik3r3	TRUE	-0.403858	0.215172	-1.87691	0.0605304	0.455291	2099.24	2624.22	2676.84	1254.89	2086.15	2251.13
ENSMUSG00000041959	S100a10	TRUE	-0.264942	0.141195	-1.87642	0.0605972	0.455446	5840.96	5317.9	5197.93	5458.08	4221.46	3934.96
ENSMUSG00000038349	Plcl1	TRUE	-0.542929	0.28936	-1.87631	0.0606128	0.455446	87.6401	109.771	100.482	58.3936	56.8775	89.2032
ENSMUSG00000028383	Hsdl2	TRUE	-0.242342	0.129187	-1.8759	0.0606687	0.455634	672.251	769.256	778.734	564.472	634.328	677.543
ENSMUSG00000021775	Nr1d2	TRUE	-0.264368	0.14095	-1.87562	0.0607077	0.455695	1257.89	1249.51	1179.66	1189.63	1022.83	858.956
ENSMUSG00000031029	Eif3f	TRUE	0.161476	0.0861629	1.87407	0.0609202	0.457057	3526.23	3410.63	3736.92	4116.18	4081.68	3739.52
ENSMUSG00000046070	Igfals	TRUE	-0.857577	0.45775	-1.87346	0.0610048	0.457458	31.9629	25.7276	35.1686	12.5947	20.2445	18.0411
ENSMUSG00000027628	Aar2	TRUE	-0.2009	0.107284	-1.87259	0.061125	0.458042	570.176	573.726	564.708	494.628	484.904	507.155
ENSMUSG00000068758	Il3ra	TRUE	0.294736	0.157407	1.87245	0.0611448	0.458042	865.059	831.002	647.103	887.354	899.435	1087.48
ENSMUSG00000028345	Tex10	TRUE	0.191346	0.102292	1.87058	0.061403	0.459743	1054.77	989.656	923.428	1170.16	1137.55	1081.46
ENSMUSG00000022156	Gzme	TRUE	-0.671679	0.359231	-1.86977	0.0615162	0.460356	645.444	1014.53	804.86	296.548	876.299	373.851
ENSMUSG00000004044	Ptrf	TRUE	0.211982	0.113392	1.86945	0.0615597	0.460382	23123.6	19827.4	19811	21574.7	26002.6	25115.2
ENSMUSG00000022494	Shisa9	TRUE	-3.61576	1.93436	-1.86923	0.0615908	0.460382	1.03106	2.57276	10.0482	1.14497	0	0
ENSMUSG00000022768	Ccdc116	TRUE	0.658374	0.352253	1.86904	0.0616178	0.460382	41.2424	47.1673	60.2891	104.193	54.9494	76.1735
ENSMUSG00000041707	1810011H11Rik	TRUE	-0.505111	0.27028	-1.86884	0.0616446	0.460382	160.845	201.533	115.554	100.758	107.007	129.294
ENSMUSG00000028692	Akr1a1	TRUE	-0.114414	0.0612328	-1.86851	0.0616913	0.460497	11615.9	11903.3	11862.9	10744.4	11094	10845.7
ENSMUSG00000001999	Blvra	TRUE	-0.25864	0.138456	-1.86803	0.0617583	0.460764	821.755	733.237	777.73	624.01	747.119	577.315
ENSMUSG00000006398	Cdc20	TRUE	0.402978	0.215785	1.8675	0.0618324	0.461083	813.506	645.763	575.761	645.765	995.838	1047.39
ENSMUSG00000053333	Dis3l2	TRUE	-0.298747	0.160043	-1.86667	0.0619479	0.461711	277.355	257.276	237.137	207.24	197.625	222.507
ENSMUSG00000028159	Dapp1	TRUE	0.315565	0.169198	1.86506	0.0621725	0.463007	237.144	315.592	291.397	348.072	379.826	323.737
ENSMUSG00000022387	Brd1	TRUE	0.158157	0.0848038	1.86498	0.0621846	0.463007	1583.71	1746.05	1676.04	1869.74	1885.63	1832.17
ENSMUSG00000063171	Rps4y2	TRUE	0.345673	0.1854	1.86448	0.0622548	0.463295	820.724	789.838	541.597	1031.62	838.702	865.972
ENSMUSG00000034189	Hsdl1	TRUE	-0.283767	0.152228	-1.8641	0.0623082	0.463459	320.66	313.877	379.821	277.083	265.107	290.662
ENSMUSG00000056492	Gpr116	TRUE	0.148755	0.0798279	1.86344	0.0623999	0.463907	7939.16	7802.33	7402.5	8344.56	8246.27	9066.65
ENSMUSG00000049551	Fzd9	TRUE	1.49554	0.802879	1.86272	0.0625014	0.464427	20.6212	14.579	12.0578	6.86984	31.8128	94.2146
ENSMUSG00000031434	Morc4	TRUE	0.331294	0.177885	1.86241	0.0625457	0.464522	451.604	361.044	512.457	508.368	634.328	522.189
ENSMUSG00000074088	Snrnp40	TRUE	0.293376	0.157623	1.86125	0.0627092	0.465094	772.264	605.457	548.631	752.247	767.364	839.913
ENSMUSG00000032816	Igdcc4	TRUE	0.254523	0.136752	1.8612	0.0627163	0.465094	2260.08	2025.62	2326.15	3100.59	2448.62	2339.33
ENSMUSG00000036098	Myrf	TRUE	0.75903	0.40782	1.86119	0.0627174	0.465094	56.7083	37.7339	32.1542	57.2486	103.151	53.121
ENSMUSG00000026365	Cfh	TRUE	-0.49841	0.267845	-1.86081	0.0627705	0.465253	1445.55	988.799	1275.11	530.122	924.5	1169.66
ENSMUSG00000093803	Ppp2r3d	TRUE	0.950006	0.51078	1.85991	0.0628978	0.465962	36.0871	18.8669	12.0578	46.9439	51.0933	31.0708
ENSMUSG00000040841	Six5	TRUE	0.280283	0.150725	1.85957	0.0629467	0.466091	274.262	292.437	296.421	319.447	335.481	392.895
ENSMUSG00000037254	Itih2	TRUE	-0.633029	0.340488	-1.85918	0.0630011	0.466258	714.525	1470.76	1012.86	380.131	681.566	1000.28
ENSMUSG00000022754	Tmem45a	TRUE	0.271401	0.145997	1.85895	0.0630343	0.46627	2197.19	2071.07	2232.71	2601.38	2144.96	3100.06
ENSMUSG00000086607	4930511M06Rik	FALSE	-3.51922	1.89351	-1.85857	0.0630877	0.466431	2.06212	8.57588	2.00964	0	0	1.00228
ENSMUSG00000031283	Chrdl1	TRUE	1.13233	0.60938	1.85817	0.0631444	0.466543	106.199	22.2973	63.3036	65.2634	95.4385	258.589
ENSMUSG00000053062	Jam2	TRUE	0.505212	0.272009	1.85734	0.0632629	0.466543	285.604	327.598	211.012	267.924	517.681	383.874
ENSMUSG00000039748	Exo1	TRUE	0.477594	0.257221	1.85675	0.063347	0.466543	147.442	140.644	106.511	133.962	206.301	208.475
ENSMUSG00000016239	Lonrf3	TRUE	-0.564964	0.3043	-1.8566	0.063368	0.466543	88.6712	85.7588	63.3036	42.364	57.8415	60.137
ENSMUSG00000042289	Hsd3b7	TRUE	-0.258196	0.139073	-1.85656	0.0633739	0.466543	423.766	457.952	461.212	346.927	356.689	418.954
ENSMUSG00000026201	Stk16	TRUE	0.34365	0.185106	1.8565	0.0633819	0.466543	928.985	666.346	582.795	976.662	919.68	866.974
[truncated: 12,736 more rows]
