# Supplementary material for: Hypertrophic chondrocytes serve as a reservoir for marrow-associated skeletal stem and progenitor cells, osteoblasts, and adipocytes during skeletal development
Source: eLife journal article supplement (doi:10.7554/elife.76932), 2022-02-18
Supplement: supp [file elife-76932-supp-v1.zip › elife_poa_e76932_Figure_7_source_data_3.xlsx]

## Sheet: Sheet1
Analysis Type:	PANTHER Overrepresentation Test (Released 20210224)
Annotation Version and Release Date:	GO Ontology database DOI: 10.5281/zenodo.4437524 Released 2021-01-01
Analyzed List:	upload_1 (Mus musculus)
Reference List:	Mus musculus (all genes in database)
Test Type:	FISHER
Correction:	FDR
GO biological process complete	Mus musculus - REFLIST (21988)	upload_1 (227)	upload_1 (expected)	upload_1 (over/under)	upload_1 (fold Enrichment)	upload_1 (raw P-value)	upload_1 (FDR)
positive regulation of monocyte differentiation (GO:0045657)	9	3	0.09	+	32.29	0.000216	0.0328
metanephric tubule development (GO:0072170)	18	4	0.19	+	21.53	6.72e-05	0.0143
metanephric epithelium development (GO:0072207)	20	4	0.21	+	19.37	9.61e-05	0.0182
metanephros morphogenesis (GO:0003338)	24	4	0.25	+	16.14	0.000179	0.0285
stem cell proliferation (GO:0072089)	26	4	0.27	+	14.9	0.000236	0.0354
neuron maturation (GO:0042551)	42	5	0.43	+	11.53	0.000115	0.0204
collagen metabolic process (GO:0032963)	56	6	0.58	+	10.38	4.06e-05	0.00927
organ growth (GO:0035265)	100	7	1.03	+	6.78	0.000116	0.0203
regulation of animal organ morphogenesis (GO:2000027)	129	8	1.33	+	6.01	8.48e-05	0.0165
positive regulation of leukocyte proliferation (GO:0070665)	152	8	1.57	+	5.1	0.000248	0.0361
regulation of lymphocyte proliferation (GO:0050670)	232	12	2.4	+	5.01	8.54e-06	0.00286
regulation of production of molecular mediator of immune response (GO:0002700)	155	8	1.6	+	5	0.000281	0.0388
regulation of leukocyte proliferation (GO:0070663)	252	13	2.6	+	5	3.69e-06	0.00166
regulation of mononuclear cell proliferation (GO:0032944)	235	12	2.43	+	4.95	9.66e-06	0.0031
B cell activation (GO:0042113)	181	9	1.87	+	4.82	0.000154	0.0252
cellular response to metal ion (GO:0071248)	161	8	1.66	+	4.81	0.000358	0.047
mesenchyme development (GO:0060485)	217	10	2.24	+	4.46	0.000121	0.021
positive regulation of immune effector process (GO:0002699)	264	12	2.73	+	4.4	2.91e-05	0.00739
lymphocyte activation (GO:0046649)	442	19	4.56	+	4.16	3.05e-07	0.000209
lymphocyte differentiation (GO:0030098)	289	12	2.98	+	4.02	6.72e-05	0.0141
extracellular matrix organization (GO:0030198)	268	11	2.77	+	3.98	0.000149	0.0252
external encapsulating structure organization (GO:0045229)	269	11	2.78	+	3.96	0.000154	0.0257
extracellular structure organization (GO:0043062)	269	11	2.78	+	3.96	0.000154	0.0255
adaptive immune response (GO:0002250)	492	20	5.08	+	3.94	3.45e-07	0.000226
leukocyte activation (GO:0045321)	549	22	5.67	+	3.88	1.1e-07	0.000102
mononuclear cell differentiation (GO:1903131)	325	13	3.36	+	3.87	4.84e-05	0.0107
regulation of immune effector process (GO:0002697)	430	17	4.44	+	3.83	3.85e-06	0.00169
adaptive immune response based on somatic recombination of immune receptors built from immunoglobulin superfamily domains (GO:0002460)	343	13	3.54	+	3.67	8.19e-05	0.0163
lymphocyte mediated immunity (GO:0002449)	320	12	3.3	+	3.63	0.000169	0.0271
regulation of vasculature development (GO:1901342)	295	11	3.05	+	3.61	0.000329	0.0447
cell activation (GO:0001775)	632	23	6.52	+	3.53	2.91e-07	0.000208
leukocyte differentiation (GO:0002521)	389	14	4.02	+	3.49	7.45e-05	0.015
negative regulation of immune system process (GO:0002683)	417	15	4.31	+	3.48	4.15e-05	0.00932
positive regulation of immune system process (GO:0002684)	1029	36	10.62	+	3.39	2.5e-10	9.84e-07
cell population proliferation (GO:0008283)	550	19	5.68	+	3.35	6.76e-06	0.00242
negative regulation of response to external stimulus (GO:0032102)	377	13	3.89	+	3.34	0.000202	0.0308
positive regulation of cytokine production (GO:0001819)	448	15	4.63	+	3.24	9.02e-05	0.0173
regulation of defense response (GO:0031347)	562	18	5.8	+	3.1	3.14e-05	0.00783
positive regulation of cell adhesion (GO:0045785)	441	14	4.55	+	3.08	0.000262	0.0372
biological adhesion (GO:0022610)	855	27	8.83	+	3.06	3.92e-07	0.000247
regulation of immune system process (GO:0002682)	1497	47	15.45	+	3.04	1.08e-11	1.69e-07
regulation of response to external stimulus (GO:0032101)	893	28	9.22	+	3.04	2.69e-07	0.000202
cell adhesion (GO:0007155)	845	26	8.72	+	2.98	1.05e-06	0.000611
regulation of cell adhesion (GO:0030155)	733	22	7.57	+	2.91	1.09e-05	0.00329
hemopoiesis (GO:0030097)	679	20	7.01	+	2.85	3.58e-05	0.00881
regulation of cytokine production (GO:0001817)	714	21	7.37	+	2.85	2.32e-05	0.00619
hematopoietic or lymphoid organ development (GO:0048534)	737	21	7.61	+	2.76	3.63e-05	0.0088
regulation of anatomical structure morphogenesis (GO:0022603)	968	27	9.99	+	2.7	3.87e-06	0.00165
regulation of immune response (GO:0050776)	871	24	8.99	+	2.67	1.68e-05	0.00472
cell migration (GO:0016477)	880	24	9.08	+	2.64	1.98e-05	0.00546
immune system development (GO:0002520)	772	21	7.97	+	2.63	6.93e-05	0.0143
response to other organism (GO:0051707)	1436	39	14.82	+	2.63	4.06e-08	5.32e-05
response to external biotic stimulus (GO:0043207)	1438	39	14.85	+	2.63	4.2e-08	5.09e-05
regulation of leukocyte activation (GO:0002694)	740	20	7.64	+	2.62	0.000113	0.0202
immune effector process (GO:0002252)	667	18	6.89	+	2.61	0.000254	0.0363
response to biotic stimulus (GO:0009607)	1469	39	15.17	+	2.57	7.28e-08	7.64e-05
positive regulation of multicellular organismal process (GO:0051240)	1565	41	16.16	+	2.54	4.52e-08	5.09e-05
defense response to other organism (GO:0098542)	1075	28	11.1	+	2.52	8.83e-06	0.0029
tube morphogenesis (GO:0035239)	736	19	7.6	+	2.5	0.000294	0.0403
regulation of cell activation (GO:0050865)	785	20	8.1	+	2.47	0.000241	0.0354
anatomical structure formation involved in morphogenesis (GO:0048646)	946	24	9.77	+	2.46	9.81e-05	0.018
positive regulation of cell population proliferation (GO:0008284)	995	25	10.27	+	2.43	7.1e-05	0.0145
biological process involved in interspecies interaction between organisms (GO:0044419)	1596	40	16.48	+	2.43	2.4e-07	0.000189
defense response (GO:0006952)	1438	36	14.85	+	2.42	1.13e-06	0.000638
innate immune response (GO:0045087)	840	21	8.67	+	2.42	0.000337	0.0449
negative regulation of signal transduction (GO:0009968)	1207	30	12.46	+	2.41	1.21e-05	0.00359
negative regulation of cell communication (GO:0010648)	1328	33	13.71	+	2.41	3.97e-06	0.00165
positive regulation of cell differentiation (GO:0045597)	927	23	9.57	+	2.4	0.000166	0.027
negative regulation of signaling (GO:0023057)	1332	33	13.75	+	2.4	4.17e-06	0.00168
animal organ morphogenesis (GO:0009887)	1029	25	10.62	+	2.35	9.8e-05	0.0181
regulation of ion transport (GO:0043269)	1371	33	14.15	+	2.33	6.95e-06	0.00238
response to external stimulus (GO:0009605)	2372	57	24.49	+	2.33	1.33e-09	2.98e-06
circulatory system development (GO:0072359)	922	22	9.52	+	2.31	0.000337	0.0453
localization of cell (GO:0051674)	1019	24	10.52	+	2.28	0.000199	0.0311
cell motility (GO:0048870)	1019	24	10.52	+	2.28	0.000199	0.0308
regulation of multicellular organismal development (GO:2000026)	1446	34	14.93	+	2.28	1.02e-05	0.00322
immune response (GO:0006955)	1537	36	15.87	+	2.27	5.31e-06	0.00199
positive regulation of developmental process (GO:0051094)	1419	33	14.65	+	2.25	1.66e-05	0.00476
immune system process (GO:0002376)	2434	56	25.13	+	2.23	9.1e-09	1.43e-05
regulation of multicellular organismal process (GO:0051239)	2787	64	28.77	+	2.22	6.78e-10	1.78e-06
tissue development (GO:0009888)	1673	38	17.27	+	2.2	6.87e-06	0.0024
anatomical structure morphogenesis (GO:0009653)	2258	51	23.31	+	2.19	1.3e-07	0.000114
regulation of response to stress (GO:0080134)	1242	28	12.82	+	2.18	0.000129	0.022
cell development (GO:0048468)	1808	40	18.67	+	2.14	5.16e-06	0.00198
neurogenesis (GO:0022008)	1494	33	15.42	+	2.14	5.04e-05	0.0109
cell surface receptor signaling pathway (GO:0007166)	1904	42	19.66	+	2.14	4.37e-06	0.00172
regulation of transport (GO:0051049)	1864	41	19.24	+	2.13	6.37e-06	0.00233
locomotion (GO:0040011)	1228	27	12.68	+	2.13	0.000238	0.0353
negative regulation of response to stimulus (GO:0048585)	1597	35	16.49	+	2.12	2.9e-05	0.00749
animal organ development (GO:0048513)	3143	67	32.45	+	2.06	5.43e-09	9.49e-06
system development (GO:0048731)	4171	86	43.06	+	2	4.16e-11	3.27e-07
regulation of cell population proliferation (GO:0042127)	1702	35	17.57	+	1.99	9.72e-05	0.0182
nervous system development (GO:0007399)	2096	43	21.64	+	1.99	2.01e-05	0.00546
cellular response to organic substance (GO:0071310)	1814	37	18.73	+	1.98	8.38e-05	0.0165
positive regulation of cell communication (GO:0010647)	1711	34	17.66	+	1.92	0.000263	0.037
positive regulation of signaling (GO:0023056)	1718	34	17.74	+	1.92	0.000276	0.0384
regulation of signal transduction (GO:0009966)	2805	55	28.96	+	1.9	3.15e-06	0.00146
positive regulation of response to stimulus (GO:0048584)	2254	44	23.27	+	1.89	3.98e-05	0.0092
cell differentiation (GO:0030154)	3559	69	36.74	+	1.88	1.08e-07	0.000106
cellular response to chemical stimulus (GO:0070887)	2382	46	24.59	+	1.87	3.7e-05	0.0087
regulation of response to stimulus (GO:0048583)	3898	75	40.24	+	1.86	3.91e-08	5.6e-05
cellular developmental process (GO:0048869)	3610	69	37.27	+	1.85	2.04e-07	0.000169
regulation of developmental process (GO:0050793)	2521	48	26.03	+	1.84	3.64e-05	0.00868
regulation of cell communication (GO:0010646)	3213	61	33.17	+	1.84	1.82e-06	0.000986
regulation of signaling (GO:0023051)	3225	61	33.29	+	1.83	1.95e-06	0.00099
multicellular organism development (GO:0007275)	4784	90	49.39	+	1.82	1.38e-09	2.71e-06
regulation of localization (GO:0032879)	2837	53	29.29	+	1.81	1.65e-05	0.00482
anatomical structure development (GO:0048856)	5162	96	53.29	+	1.8	4.8e-10	1.51e-06
developmental process (GO:0032502)	5556	102	57.36	+	1.78	1.73e-10	9.06e-07
response to organic substance (GO:0010033)	2530	45	26.12	+	1.72	0.000339	0.0448
response to chemical (GO:0042221)	3471	60	35.83	+	1.67	4.96e-05	0.0109
positive regulation of biological process (GO:0048518)	6167	97	63.67	+	1.52	2.52e-06	0.0012
positive regulation of cellular process (GO:0048522)	5674	88	58.58	+	1.5	2.45e-05	0.00643
negative regulation of cellular process (GO:0048523)	4818	73	49.74	+	1.47	0.000373	0.0485
multicellular organismal process (GO:0032501)	7321	108	75.58	+	1.43	1.02e-05	0.00315
response to stimulus (GO:0050896)	8444	123	87.17	+	1.41	1.89e-06	0.000993
regulation of biological process (GO:0050789)	11978	159	123.66	+	1.29	2.3e-06	0.00113
biological regulation (GO:0065007)	12583	167	129.9	+	1.29	4.79e-07	0.00029
regulation of cellular process (GO:0050794)	11462	148	118.33	+	1.25	9.89e-05	0.0179
heterocycle metabolic process (GO:0046483)	2293	8	23.67	-	0.34	0.000252	0.0365
sensory perception of smell (GO:0007608)	1123	1	11.59	-	0.09	0.000184	0.0289
