# Supplementary material for: Hypertrophic chondrocytes serve as a reservoir for marrow-associated skeletal stem and progenitor cells, osteoblasts, and adipocytes during skeletal development
Source: eLife journal article supplement (doi:10.7554/elife.76932), 2022-02-18
Supplement: supp [file elife-76932-supp-v1.zip › elife_poa_e76932_Figure_7_source_data_4.xlsx]

## Sheet: Sheet1
Analysis Type:	PANTHER Overrepresentation Test (Released 20210224)
Annotation Version and Release Date:	GO Ontology database DOI: 10.5281/zenodo.4437524 Released 2021-01-01
Analyzed List:	upload_1 (Mus musculus)
Reference List:	Mus musculus (all genes in database)
Test Type:	FISHER
Correction:	FDR
GO biological process complete	Mus musculus - REFLIST (21988)	upload_1 (142)	upload_1 (expected)	upload_1 (over/under)	upload_1 (fold Enrichment)	upload_1 (raw P-value)	upload_1 (FDR)
trans-synaptic signaling, modulating synaptic transmission (GO:0099550)	14	4	0.09	+	44.24	4.64e-06	0.0243
cell adhesion (GO:0007155)	845	28	5.46	+	5.13	1.53e-12	2.42e-08
biological adhesion (GO:0022610)	855	28	5.52	+	5.07	2.01e-12	1.59e-08
