# Supplementary material for: Hypertrophic chondrocytes serve as a reservoir for marrow-associated skeletal stem and progenitor cells, osteoblasts, and adipocytes during skeletal development
Source: eLife journal article supplement (doi:10.7554/elife.76932), 2022-02-18
Supplement: supp [file elife-76932-supp-v1.zip › elife_poa_e76932_Figure_7_source_data_5.xlsx]

## Sheet: Sheet1
T/NT	Edu +	Dapi +	Ratio				nt	1	1	1		>5
t	1	3	0.333333	pl 1			nt	1	1	1		0.361699	0.425069	0.0443222
nt	3	25	0.12				nt	1	1	1		NT	T	t.test
t	1	3	0.333333				nt	1	1	1		0.16501	0.223311
t	2	2	1				nt	1	1	1		stdev	stdev
nt	2	10	0.2				nt	1	1	1
nt	3	7	0.428571				nt	1	1	1
t	2	8	0.25				nt	1	1	1		0.0367211	0.0506853
nt	4	8	0.5				nt	1	1	1		confidence interval
t	2	11	0.181818				nt	1	2	0.5
t	2	9	0.222222				nt	1	2	0.5
t	2	2	1				nt	1	2	0.5
t	3	9	0.333333				nt	1	2	0.5
t	1	2	0.5				nt	2	2	1
t	2	2	1				nt	2	2	1
nt	1	4	0.25				nt	2	2	1
nt	4	11	0.363636				nt	2	2	1
nt	2	12	0.166667				nt	2	2	1
t	2	5	0.4				nt	1	3	0.333333
nt	2	6	0.333333				nt	1	3	0.333333
nt	1	2	0.5				nt	1	3	0.333333
nt	2	3	0.666667				nt	2	3	0.666667
nt	5	20	0.25				nt	2	3	0.666667
t	1	1	1				nt	2	3	0.666667
nt	1	1	1				nt	2	3	0.666667
nt	1	2	0.5				nt	2	3	0.666667
nt	1	1	1				nt	2	3	0.666667
t	3	6	0.5				nt	2	3	0.666667
nt	3	19	0.157895				nt	1	4	0.25
nt	2	7	0.285714				nt	1	4	0.25
nt	5	14	0.357143				nt	1	4	0.25
t	1	4	0.25				nt	1	4	0.25
nt	9	15	0.6				nt	2	4	0.5
nt	2	13	0.153846				nt	3	4	0.75
nt	1	1	1				nt	3	4	0.75
t	5	12	0.416667				nt	4	4	1
nt	3	19	0.157895				nt	1	5	0.2
t	1	2	0.5				nt	2	5	0.4
nt	4	8	0.5				nt	3	5	0.6
nt	1	1	1				nt	4	5	0.8
t	6	6	1				nt	4	5	0.8
nt	10	15	0.666667				nt	1	6	0.166667
nt	2	14	0.142857				nt	2	6	0.333333
nt	16	57	0.280702				nt	2	6	0.333333
nt	1	3	0.333333				nt	3	6	0.5
t	3	3	1				nt	4	6	0.666667
t	3	3	1				nt	1	7	0.142857
t	9	32	0.28125				nt	2	7	0.285714
t	3	11	0.272727				nt	2	7	0.285714
t	1	1	1				nt	3	7	0.428571
nt	6	15	0.4				nt	3	7	0.428571
nt	5	11	0.454545	pl 2			nt	3	7	0.428571
t	2	6	0.333333				nt	3	7	0.428571
nt	2	2	1				nt	3	7	0.428571
nt	1	6	0.166667				nt	4	7	0.571429
t	2	6	0.333333				nt	4	7	0.571429
t	1	2	0.5				nt	4	7	0.571429
t	5	13	0.384615				nt	2	8	0.25
t	1	4	0.25				nt	4	8	0.5
nt	39	97	0.402062				nt	4	8	0.5
nt	1	2	0.5				nt	4	8	0.5
t	5	12	0.416667				nt	4	9	0.444444
t	2	5	0.4				nt	2	10	0.2
nt	2	10	0.2				nt	2	10	0.2
nt	2	3	0.666667				nt	3	10	0.3
nt	4	4	1				nt	4	10	0.4
nt	1	1	1				nt	5	10	0.5
nt	131	406	0.32266				nt	6	10	0.6
t	1	2	0.5				nt	1	11	0.0909091
nt	4	6	0.666667				nt	2	11	0.181818
nt	2	2	1				nt	2	11	0.181818
nt	2	4	0.5				nt	3	11	0.272727
nt	3	4	0.75				nt	4	11	0.363636
t	18	42	0.428571				nt	4	11	0.363636
t	31	44	0.704545				nt	5	11	0.454545
t	2	2	1				nt	1	12	0.0833333
t	2	5	0.4				nt	2	12	0.166667
t	5	7	0.714286				nt	2	13	0.153846
nt	2	3	0.666667				nt	2	14	0.142857
t	2	3	0.666667				nt	2	14	0.142857
nt	11	28	0.392857				nt	4	14	0.285714
t	1	7	0.142857				nt	5	14	0.357143
nt	2	5	0.4				nt	6	15	0.4
t	4	6	0.666667				nt	9	15	0.6
nt	2	11	0.181818				nt	10	15	0.666667
t	2	12	0.166667				nt	6	16	0.375
t	5	11	0.454545				nt	2	17	0.117647
t	3	7	0.428571				nt	4	18	0.222222
t	29	63	0.460317				nt	3	19	0.157895
t	2	4	0.5				nt	3	19	0.157895
t	1	6	0.166667				nt	5	20	0.25
t	11	25	0.44				nt	7	20	0.35
nt	5	10	0.5				nt	9	21	0.428571
t	1	1	1				nt	8	24	0.333333
t	1	12	0.0833333				nt	3	25	0.12
nt	2	14	0.142857				nt	5	27	0.185185
nt	4	5	0.8				nt	7	27	0.259259
nt	32	56	0.571429				nt	11	27	0.407407
nt	3	5	0.6				nt	11	28	0.392857
nt	1	4	0.25				nt	14	30	0.466667
nt	4	18	0.222222				nt	8	41	0.195122
t	4	30	0.133333				nt	20	42	0.47619
t	11	44	0.25				nt	28	47	0.595745
t	1	1	1	pl 3			nt	14	48	0.291667
t	1	5	0.2				nt	27	52	0.519231
nt	1	4	0.25				nt	32	56	0.571429
t	1	1	1				nt	16	57	0.280702
nt	1	1	1				nt	30	67	0.447761
t	2	3	0.666667				nt	24	79	0.303797
nt	1	5	0.2				nt	37	79	0.468354
t	6	14	0.428571				nt	39	97	0.402062
nt	1	1	1				nt	31	108	0.287037
t	4	8	0.5				nt	34	110	0.309091
t	1	7	0.142857				nt	54	137	0.394161
nt	2	7	0.285714				nt	37	214	0.172897
nt	1	12	0.0833333				nt	131	406	0.32266
nt	2	17	0.117647				t	1	1	1
nt	2	3	0.666667				t	1	1	1
nt	8	24	0.333333				t	1	1	1
t	9	18	0.5				t	1	1	1
t	2	9	0.222222				t	1	1	1
nt	4	14	0.285714				t	2	2	1
nt	1	11	0.0909091				t	2	2	1
t	1	2	0.5				t	1	2	0.5
t	4	5	0.8				t	2	2	1
t	3	6	0.5				t	1	2	0.5
nt	2	11	0.181818				t	1	2	0.5
nt	1	3	0.333333				t	1	2	0.5
nt	2	8	0.25				t	2	2	1
t	2	2	1				t	1	2	0.5
nt	2	6	0.333333				t	2	2	1
nt	34	110	0.309091				t	2	2	1
t	2	7	0.285714				t	2	2	1
nt	3	7	0.428571				t	1	2	0.5
t	2	6	0.333333				t	1	2	0.5
nt	9	21	0.428571				t	2	2	1
t	6	13	0.461538				t	1	3	0.333333
t	16	43	0.372093				t	1	3	0.333333
nt	20	42	0.47619				t	3	3	1
nt	37	214	0.172897	pl 4			t	3	3	1
t	2	2	1				t	2	3	0.666667
nt	4	7	0.571429				t	2	3	0.666667
nt	4	10	0.4				t	1	3	0.333333
t	1	7	0.142857				t	2	3	0.666667
t	2	6	0.333333				t	1	3	0.333333
t	3	10	0.3				t	1	4	0.25
t	2	2	1				t	1	4	0.25
nt	6	10	0.6				t	2	4	0.5
nt	8	41	0.195122				t	4	4	1
nt	4	9	0.444444				t	2	4	0.5
t	19	50	0.38				t	2	4	0.5
t	2	5	0.4				t	2	5	0.4
t	2	5	0.4				t	2	5	0.4
t	2	12	0.166667				t	2	5	0.4
nt	2	3	0.666667				t	1	5	0.2
t	6	6	1				t	4	5	0.8
nt	3	7	0.428571				t	2	5	0.4
nt	4	8	0.5				t	2	5	0.4
nt	54	137	0.394161	pl 5			t	5	5	1
nt	1	2	0.5				t	2	5	0.4
t	5	5	1				t	3	6	0.5
nt	1	3	0.333333				t	6	6	1
nt	3	4	0.75				t	2	6	0.333333
t	4	4	1				t	2	6	0.333333
t	2	4	0.5				t	4	6	0.666667
nt	3	10	0.3				t	1	6	0.166667
t	5	6	0.833333				t	3	6	0.5
nt	4	5	0.8				t	2	6	0.333333
t	5	8	0.625				t	2	6	0.333333
nt	2	3	0.666667				t	6	6	1
t	7	8	0.875				t	5	6	0.833333
t	2	10	0.2				t	3	6	0.5
t	11	14	0.785714				t	5	7	0.714286
nt	7	27	0.259259				t	1	7	0.142857
t	2	14	0.142857				t	3	7	0.428571
nt	4	11	0.363636				t	1	7	0.142857
t	1	2	0.5				t	2	7	0.285714
t	16	42	0.380952				t	1	7	0.142857
nt	31	108	0.287037				t	3	7	0.428571
t	7	11	0.636364				t	6	7	0.857143
t	10	37	0.27027				t	2	7	0.285714
nt	1	7	0.142857				t	2	8	0.25
t	3	7	0.428571				t	4	8	0.5
t	2	13	0.153846				t	5	8	0.625
nt	27	52	0.519231				t	7	8	0.875
nt	2	2	1				t	4	8	0.5
nt	2	3	0.666667				t	2	9	0.222222
nt	1	1	1				t	3	9	0.333333
nt	11	27	0.407407				t	2	9	0.222222
t	7	9	0.777778				t	7	9	0.777778
nt	4	7	0.571429				t	3	10	0.3
nt	2	2	1				t	2	10	0.2
t	1	2	0.5				t	4	10	0.4
t	63	213	0.295775				t	5	10	0.5
t	21	29	0.724138				t	2	11	0.181818
nt	3	11	0.272727				t	3	11	0.272727
nt	5	27	0.185185				t	5	11	0.454545
t	5	19	0.263158				t	7	11	0.636364
t	6	7	0.857143				t	5	12	0.416667
t	6	34	0.176471				t	5	12	0.416667
nt	24	79	0.303797				t	2	12	0.166667
t	1	3	0.333333				t	1	12	0.0833333
t	2	4	0.5				t	2	12	0.166667
nt	3	7	0.428571				t	5	13	0.384615
t	9	20	0.45				t	6	13	0.461538
t	4	8	0.5				t	2	13	0.153846
t	2	5	0.4				t	6	14	0.428571
nt	3	6	0.5				t	11	14	0.785714
t	4	10	0.4				t	2	14	0.142857
t	2	3	0.666667				t	7	16	0.4375
nt	4	7	0.571429				t	9	18	0.5
t	2	2	1				t	5	19	0.263158
nt	28	47	0.595745				t	9	20	0.45
nt	1	1	1				t	11	25	0.44
t	1	3	0.333333				t	21	29	0.724138
t	25	42	0.595238				t	4	30	0.133333
t	7	16	0.4375				t	9	32	0.28125
nt	6	16	0.375				t	6	34	0.176471
nt	1	4	0.25				t	10	37	0.27027
t	5	10	0.5				t	18	42	0.428571
nt	14	48	0.291667				t	16	42	0.380952
nt	37	79	0.468354				t	25	42	0.595238
nt	30	67	0.447761				t	16	43	0.372093
nt	3	7	0.428571				t	31	44	0.704545
nt	2	2	1				t	11	44	0.25
nt	14	30	0.466667				t	19	50	0.38
t	2	7	0.285714				t	29	63	0.460317
t	3	6	0.5				t	63	213	0.295775
nt	7	20	0.35
