# Supplementary material for: Hypertrophic chondrocytes serve as a reservoir for marrow-associated skeletal stem and progenitor cells, osteoblasts, and adipocytes during skeletal development
Source: eLife journal article supplement (doi:10.7554/elife.76932), 2022-02-18
Supplement: supp [file elife-76932-supp-v1.zip › elife_poa_e76932_Figure_7_source_data_6.xlsx]

## Sheet: Sheet1
Animal #	Colony Color?	# cells		Tom Average size	NT Average Size						nt	26	25
1	t	1038		259.015	211.113			nt	377		nt	26	0.308756
	t	66			0.815061			nt	1275		nt	30
	t	239		68	62			nt	290		nt	30
	t	347						nt	104		nt	30
	t	315						nt	91		nt	35
	t	390						nt	80		nt	41
	t	227						nt	259		nt	42		20-100	100-200	200+
	t	157						nt	129		nt	46	NT	25	18	19	62
	t	350						nt	221		nt	47	T	28	7	33	68
	t	438						nt	64		nt	47		0.892857	0.388889	0.575758	0.911765
	t	1147						nt	51		nt	49
	t	1681						nt	108		nt	50
	t	756						nt	341		nt	51
	t	406						nt	360		nt	51
	t	77						nt	190		nt	55
	t	56						nt	140		nt	62
	t	76						nt	441		nt	64
	t	431						nt	100		nt	77
	t	342						nt	162		nt	79
	t	90						nt	774		nt	80
	t	245						nt	700		nt	85
	t	345						nt	191		nt	86
	t	50						nt	166		nt	91
	t	69						nt	143		nt	95
	t	223						nt	742		nt	100	18
	t	236						nt	244		nt	104
	nt	377						nt	786		nt	108
	nt	1275						nt	86		nt	111
	nt	290						nt	26		nt	111
	nt	104						nt	30		nt	113
	nt	91						nt	50		nt	125
	nt	80						nt	46		nt	128
	nt	259						nt	95		nt	129
	nt	129						nt	728		nt	140
	nt	221						nt	185		nt	143
	nt	64						nt	187		nt	152
	nt	51						nt	51		nt	162
	nt	108						nt	152		nt	166
	nt	341						nt	62		nt	185
	nt	360						nt	111		nt	187
	nt	190						nt	30		nt	190
	nt	140						nt	209		nt	191
	nt	441						nt	47		nt	207	19
	nt	100						nt	42		nt	209
	nt	162						nt	49		nt	221
	nt	774						nt	30		nt	244
	nt	700						nt	85		nt	259
	nt	191						nt	128		nt	263
	nt	166						nt	41		nt	290
	nt	143						nt	622		nt	330
	nt	742						nt	207		nt	341
	nt	244						nt	35		nt	360
	nt	786						nt	111		nt	377
7	t	392						nt	26		nt	441
	nt	86						nt	55		nt	622
	t	275						nt	79		nt	700
	t	90						nt	361		nt	728
	nt	26						nt	1099		nt	742
	nt	30						nt	213		nt	774
	t	30						nt	253		nt	786
	nt	50						nt	253		nt	1275
	nt	46						nt	878		t	21	28
	nt	95						nt	2359		t	25
	t	471						nt	463		t	28
	nt	728						nt	1356		t	30
	t	512						nt	248		t	32
	nt	185						nt	262		t	38
	t	49						nt	416		t	40
	t	77						nt	263		t	45
	nt	187						nt	330		t	49
	t	28						nt	77		t	49
	t	89						nt	47		t	50
	t	372						nt	113		t	55
	t	75						nt	125		t	56
	t	45						t	1038		t	56
	t	32						t	66		t	61
	t	230						t	239		t	66
	t	485						t	347		t	69
	t	25						t	315		t	75
	t	100						t	390		t	76
	nt	51						t	227		t	76
	t	76						t	157		t	77
	nt	152						t	350		t	77
	nt	62						t	438		t	88
	nt	111						t	1147		t	89
	t	212						t	1681		t	90
	t	61						t	756		t	90
	t	40						t	406		t	94
	nt	30						t	77		t	99
	nt	209						t	56		t	100	7
	t	229						t	76		t	114
	t	49						t	431		t	123
	nt	47						t	342		t	126
	t	466						t	90		t	157
	nt	42						t	245		t	179
	nt	49						t	345		t	183
	nt	30						t	50		t	212	33
	nt	85						t	69		t	223
8	t	280						t	223		t	227
	t	126						t	236		t	229
	nt	128						t	392		t	230
	t	21						t	275		t	231
	nt	41						t	90		t	236
	nt	622						t	30		t	239
	nt	207						t	471		t	245
	nt	35						t	512		t	275
	t	630						t	49		t	280
	nt	111						t	77		t	315
	nt	26						t	28		t	342
	t	446						t	89		t	345
	t	123						t	372		t	347
	nt	55						t	75		t	350
	t	179						t	45		t	372
	t	88						t	32		t	390
	nt	79						t	230		t	392
	t	56						t	485		t	406
11	nt	263						t	25		t	431
	t	38						t	100		t	438
	t	543						t	76		t	446
	t	99						t	212		t	466
	t	55						t	61		t	471
	t	231						t	40		t	485
	t	94						t	229		t	512
	nt	330						t	49		t	543
	nt	77						t	466		t	630
	nt	47						t	280		t	756
	t	183						t	126		t	1038
	nt	113						t	21		t	1147
	nt	125						t	630		t	1681
	t	114						t	446
								t	123
								t	179
								t	88
								t	56
								t	1070
								t	2286
								t	1092
								t	258
								t	1146
								t	382
								t	105
								t	38
								t	543
								t	99
								t	55
								t	231
								t	94
								t	183
								t	114
