# Supplementary material for: Hypertrophic chondrocytes serve as a reservoir for marrow-associated skeletal stem and progenitor cells, osteoblasts, and adipocytes during skeletal development
Source: eLife journal article supplement (doi:10.7554/elife.76932), 2022-02-18
Supplement: supp [file elife-76932-supp-v1.zip › elife_poa_e76932_Figure_8_figure_supplement_1_source_data_1.xlsx]

## Sheet: Sheet1
Plate #	Location	Tomato +?	VK +?	Adipo +?	ALP+?	mouse #32 example										Tom	Non-tom	T.test
pl 1	a1-a2	y	y								VK+	Count	percent			0.904762	0.863636	0.671282
	a2	y	y						ms 45	T	19	21	0.904762			0.809524	0.708333
	a2	y	y							NT	19	22	0.863636			0.66	0.728814
	a2	y	y
	a3	n	y												Avg	0.791429	0.766928
	a3	y	y						ms 48	T	17	21	0.809524		St.dev	0.12338	0.0843758
	a4	y	y							NT	17	24	0.708333		confidence interval	0.306493	0.209601
	a4	y
	a4-b4	y
	a5-b5	y	y						ms 32	T	33	50	0.66
	b2	n	y							NT	43	59	0.728814
	b2	n
	b3	n	y
	b3	y	y
	b3-b4	y	y
	b4	n
	b4	y
	b5	y
	b5	y
	b5	y
	b5	y	y
	b5	y
	b5-b6	n	y
	b6	n	y
	c1	n
	c1	n	y
	c1	n	y
	c2	n
	c2	y
	c3	n	y
	c3	y	y
	c5	y
	c5	y	y
	c6	n	y
	c6	y
	c6	y	y
	d1	n	y
	d1	n	y
	d2	n	y
	d2-d3	n
	d4	n	y
	d4	y	y
	d4	y	y
	d5	y	y
	d5-e5	y
	d6	y	y
	e1	n
	e1	n	y
	e1	n	y
	e2	n
	e2	n
	e3	n	y
	e3	y	y
	e3	y	y
	e3-e4	n	y
	e4	y
	e5	y
	e5-e6	y
	e5-e6	y
	e5-e6	y	y
	e5-e6	n	y
	e5-e6	y	y
	e6	y	y
	f1	y	y
	f1-f2	n	y
	f2	n	y
	f2-f3	n	y
	f3	y	y
	f4	n	y
	f5	n	y
pl 2	a3	y
	a4	n	y
	a4	n	y
	a4	n	y
	a5	n	y
	a5	n	y
	a5-b5	n	y
	b1	n	y
	b1	n	y
	b2	n	y
	b2	n
	b3	n	y
	b3	n
	b3	n	y
	b4	n
	b5	n	y
	c1	n
	c1	n	y
	c2	n
	c3	y	y
	c5	n
	c6	n	y
	c6	y	y
	d1-d2	n
	d1-e1	n	y
	d2-d3	n	y
	d3	y	y
	d4	n	y
	d4	y	y
	d6	n
	e1	y	y
	e1	y	y
	e4	y	y
	e4	y
	e6	y	y
	f3	n	y
	f4-f5	n	y
	f5	n	y
	f5	y	y
pl 1	a2	n														Tom	Non-tom	t.test
	a2	y		y							Adipo+	Count	percent			0.64	0.382353	0.110938
	a2	y		y					ms 45	T	32	50	0.64			0.6	0.464286
	a2	y								NT	13	34	0.382353			0.316667	0.25
	a2	y
	a3	y													Average	0.518889	0.365546
	a3	y							ms 48	T	15	25	0.6		St.Dev	0.176268	0.108127
	a4	y		y						NT	13	28	0.464286		Confidence interval	0.437874	0.268602
	a4-a5	y
	a4-b4	n
	a5	n		y					ms 32	T	19	60	0.316667
	a5	n		y						NT	11	44	0.25
	a5	y
	a6-b6	y
	b1	y
	b1-b2	n
	b2	n
	b2	n		y
	b2	n
	b2	y
	b3	y		y
	b4	n
	b5	n
	c1	n		y
	c2	n
	c2	y
	c2-c3	n		y
	c3	y
	c3	y		y
	c3-c4	n		y
	c4	n
	c4	y
	c4-d4	y
	c5	y
	c6	n
	c6	y
	d1	n
	d1-d2	y
	d2	n
	d2	n
	d2	y
	d4	n
	d5	n
	d5	y		y
	d6	n
	d6	y
	e1	n		y
	e1	y
	e1	y		y
	e2	n
	e2	n
	e3	y
	f1-f2	y		y
	f2	n
	f2	y
	f2	y
	f2-g2	y		y
	f3-f4	n		y
	f4	n
	f5	y
pl 2	a1	n
	a1-b1	y		y
	a4	y		y
	a4	y
	a6-b6	y		y
	b1	y
	b1	y
	b1	y
	b2	y		y
	b3	y		y
	b4	y		y
	b4-b5	y		y
	b5-c5	y
	b6	n
	c1	n
	c1	y
	c1	y
	c1	y
	c2	n
	c2	y
	c2-c3	y		y
	c4	n
	c4	y
	c4-c5	n		y
	c5-c6	n
	d1	y
	d3-d4	y		y
	d4	n
	d6	y
	d6-d7	n
	d6-e6	y		y
	e1	y
	e2	n
	e2	y
	e4	n
	e5	n		y
	e5	y
	e5-e6	n
	e6	y
	f2	y
	f3	n
	f3-g3	y
	f4	n		y
	f4	n
pl 1	a2	y			y											Tom	Non-tom	t.test
	a5	n			y						Alk phos	Count	percent			0.972222	1	0.631317
	a5	n			y				ms 45	T	35	36	0.972222			1	1
	a5	n			y					NT	19	19	1			0.918033	0.833333
	b2	n			y
	b3	n			y										Average	0.963418	0.944444
	b3	y			y				ms 48	T	60	60	1		St.Dev	0.0416868	0.096225
	b4	y			y					NT	39	39	1		Confidence interval	0.103556	0.239036
	b5	y			y
	b5	n			y
	b6	n			y				ms 32	T	56	61	0.918033
	b6	y			y					NT	40	48	0.833333
	c3	y			y
	c4	n			y
	c4	n			y
	c4	n
	c5	y			y
	c5	y			y
	c5	n			y
	c6	y			y
	c6	y			y
	c6	y			y
	c6	n			y
	c6	y			y
	c6	n			y
	c6	n			y
	c6	y
	d1	y			y
	d2	y			y
	d3	n
	d3-e3	y			y
	d4	n			y
	d4	n			y
	d4	n			y
	d5	n			y
	d5	y			y
	d5	n			y
	d6	n			y
	d6	n
	e1	y			y
	e1	n			y
	e2-f2	y
	e3	y			y
	e3	y			y
	e3-e4	y			y
	e4-e5	y			y
	e5	n
	e5	y			y
	e5	y
	e6	y			y
	f3	y			y
	f4-f5	y			y
	f4	n			y
	f4	n			y
	f4	y			y
	f4	n			y
pl 2	a2	y			y
	a3	y			y
	a3	y			y
	a4	n			y
	a4	n
	a4	n
	a5	n			y
	a5	y			y
	b2	y			y
	b2	y			y
	b4	y			y
	b5	y			y
	b5	n			y
	b6	y			y
	b6	y			y
	b6	n			y
	c1	y			y
	c2	y
	c3	y			y
	c3	n			y
	c5	y			y
	c6	n			y
	d1	y			y
	d2	n			y
	d3	y			y
	d4-d5	y			y
	d5	n			y
	d5-e5	n			y
	d6	y			y
	c6-d6	n
	d6	n			y
	e1	n			y
	e1	n			y
	e2	y			y
	e3	y			y
	e3	n			y
	e3	n			y
	e4	y			y
	e4	n			y
	e4	n			y
	e4-e5	y			y
	e5	y			y
	e5	y			y
	e6	y			y
	e6	y
	f2	y			y
	f2	y			y
	f2	n			y
	f3	n
	f4	y			y
	f4	y			y
	f4	y			y
	f5	y			y
