# Supplementary figures and images for: Hypertrophic chondrocytes serve as a reservoir for marrow-associated skeletal stem and progenitor cells, osteoblasts, and adipocytes during skeletal development
Source: eLife journal article supplement (doi:10.7554/elife.76932), 2022-02-18

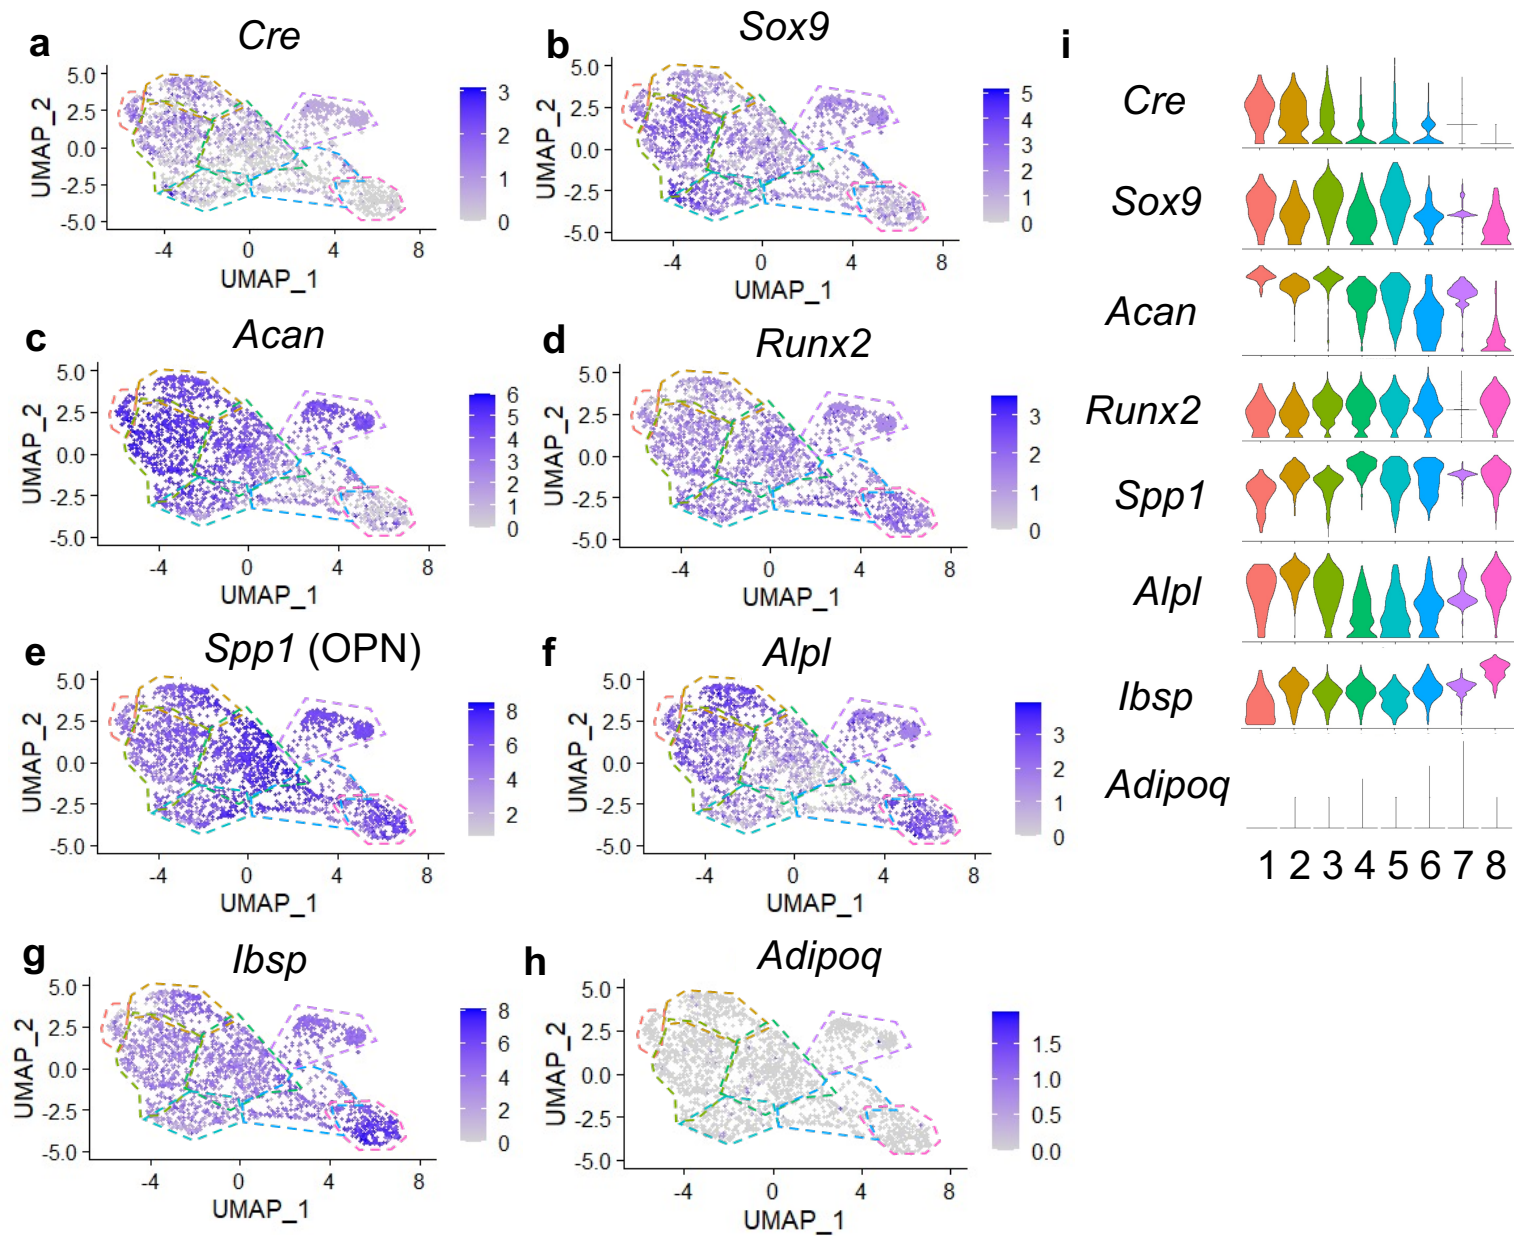

Supplement: supp [file elife-76932-supp-v1.zip › elife_poa_e76932_Figure_2_figure_supplement_2.pdf]

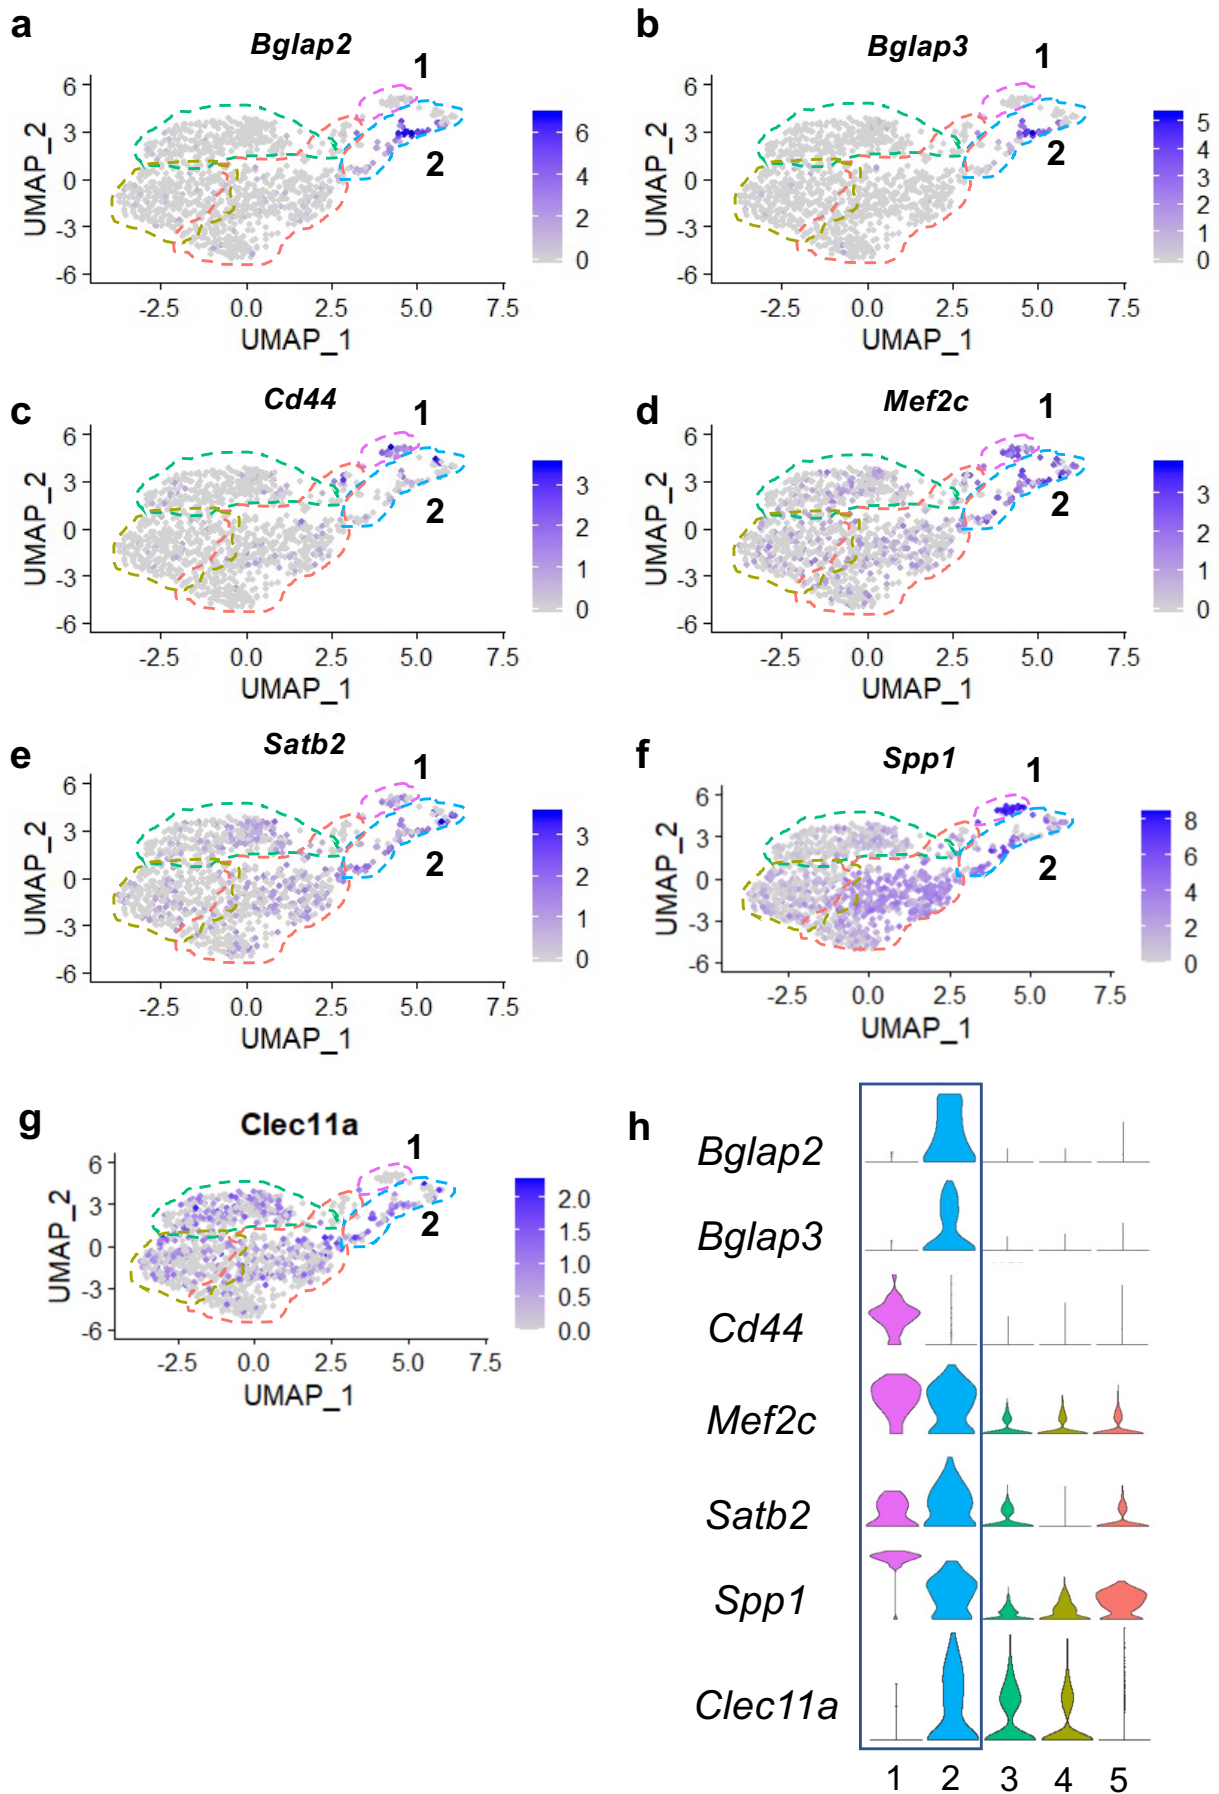

Supplement: supp [file elife-76932-supp-v1.zip › elife_poa_e76932_Figure_4_figure_supplement_1.pdf]

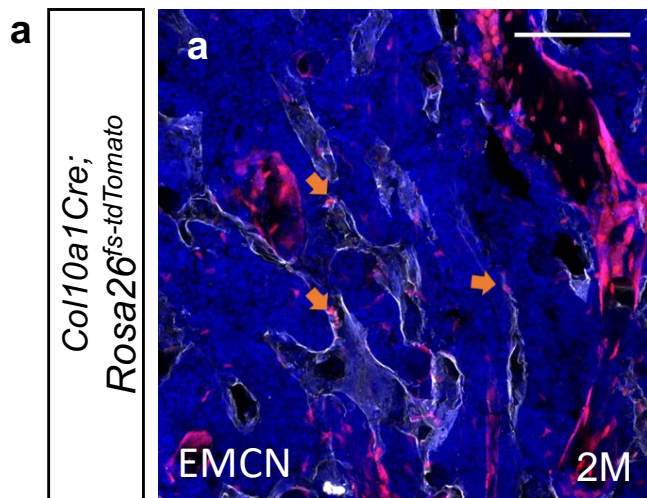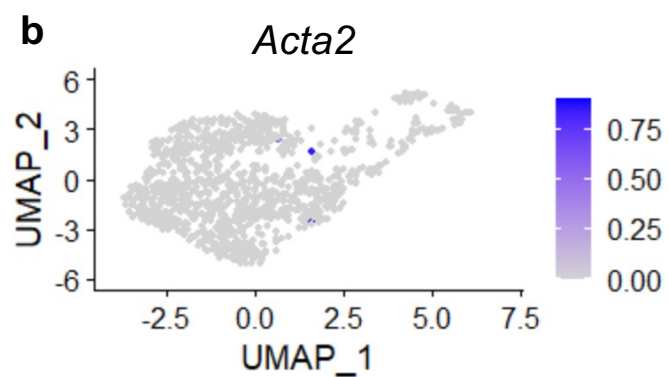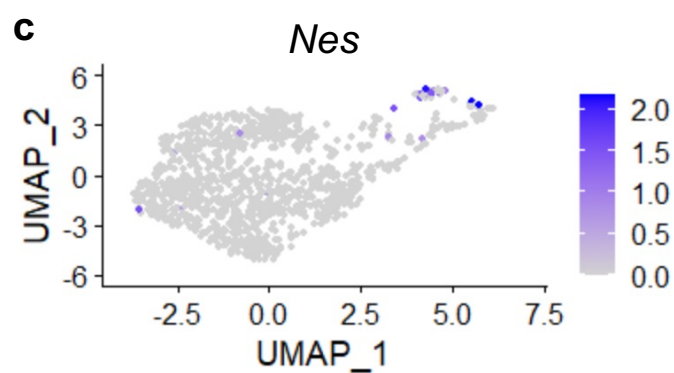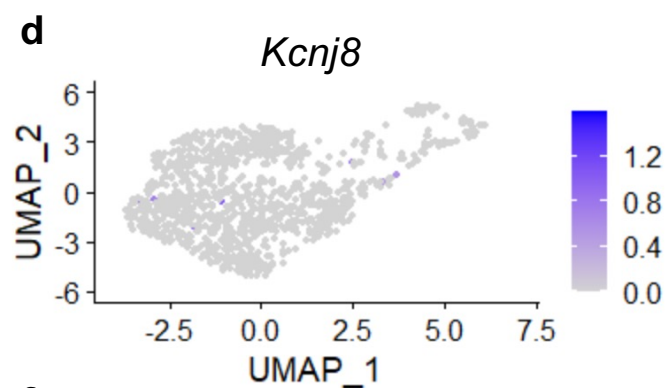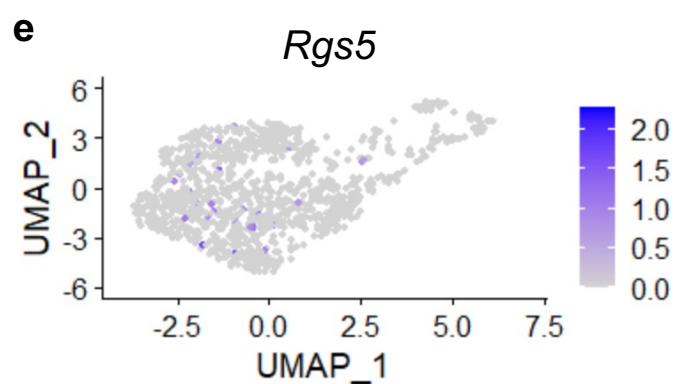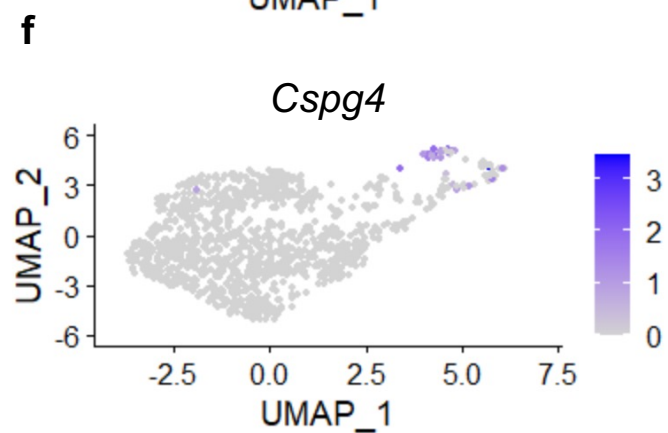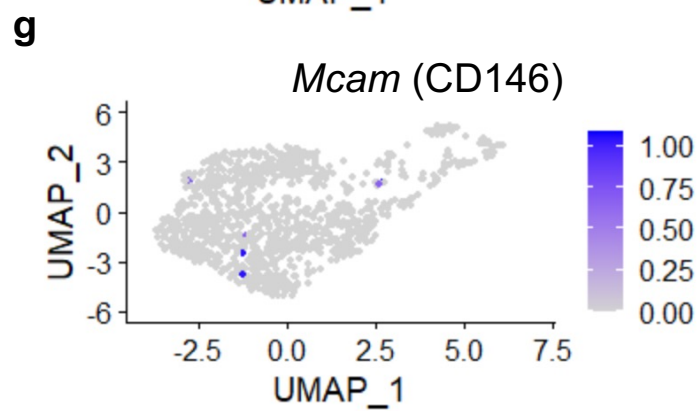

Supplement: supp [file elife-76932-supp-v1.zip › elife_poa_e76932_Figure_4_figure_supplement_2.pdf]

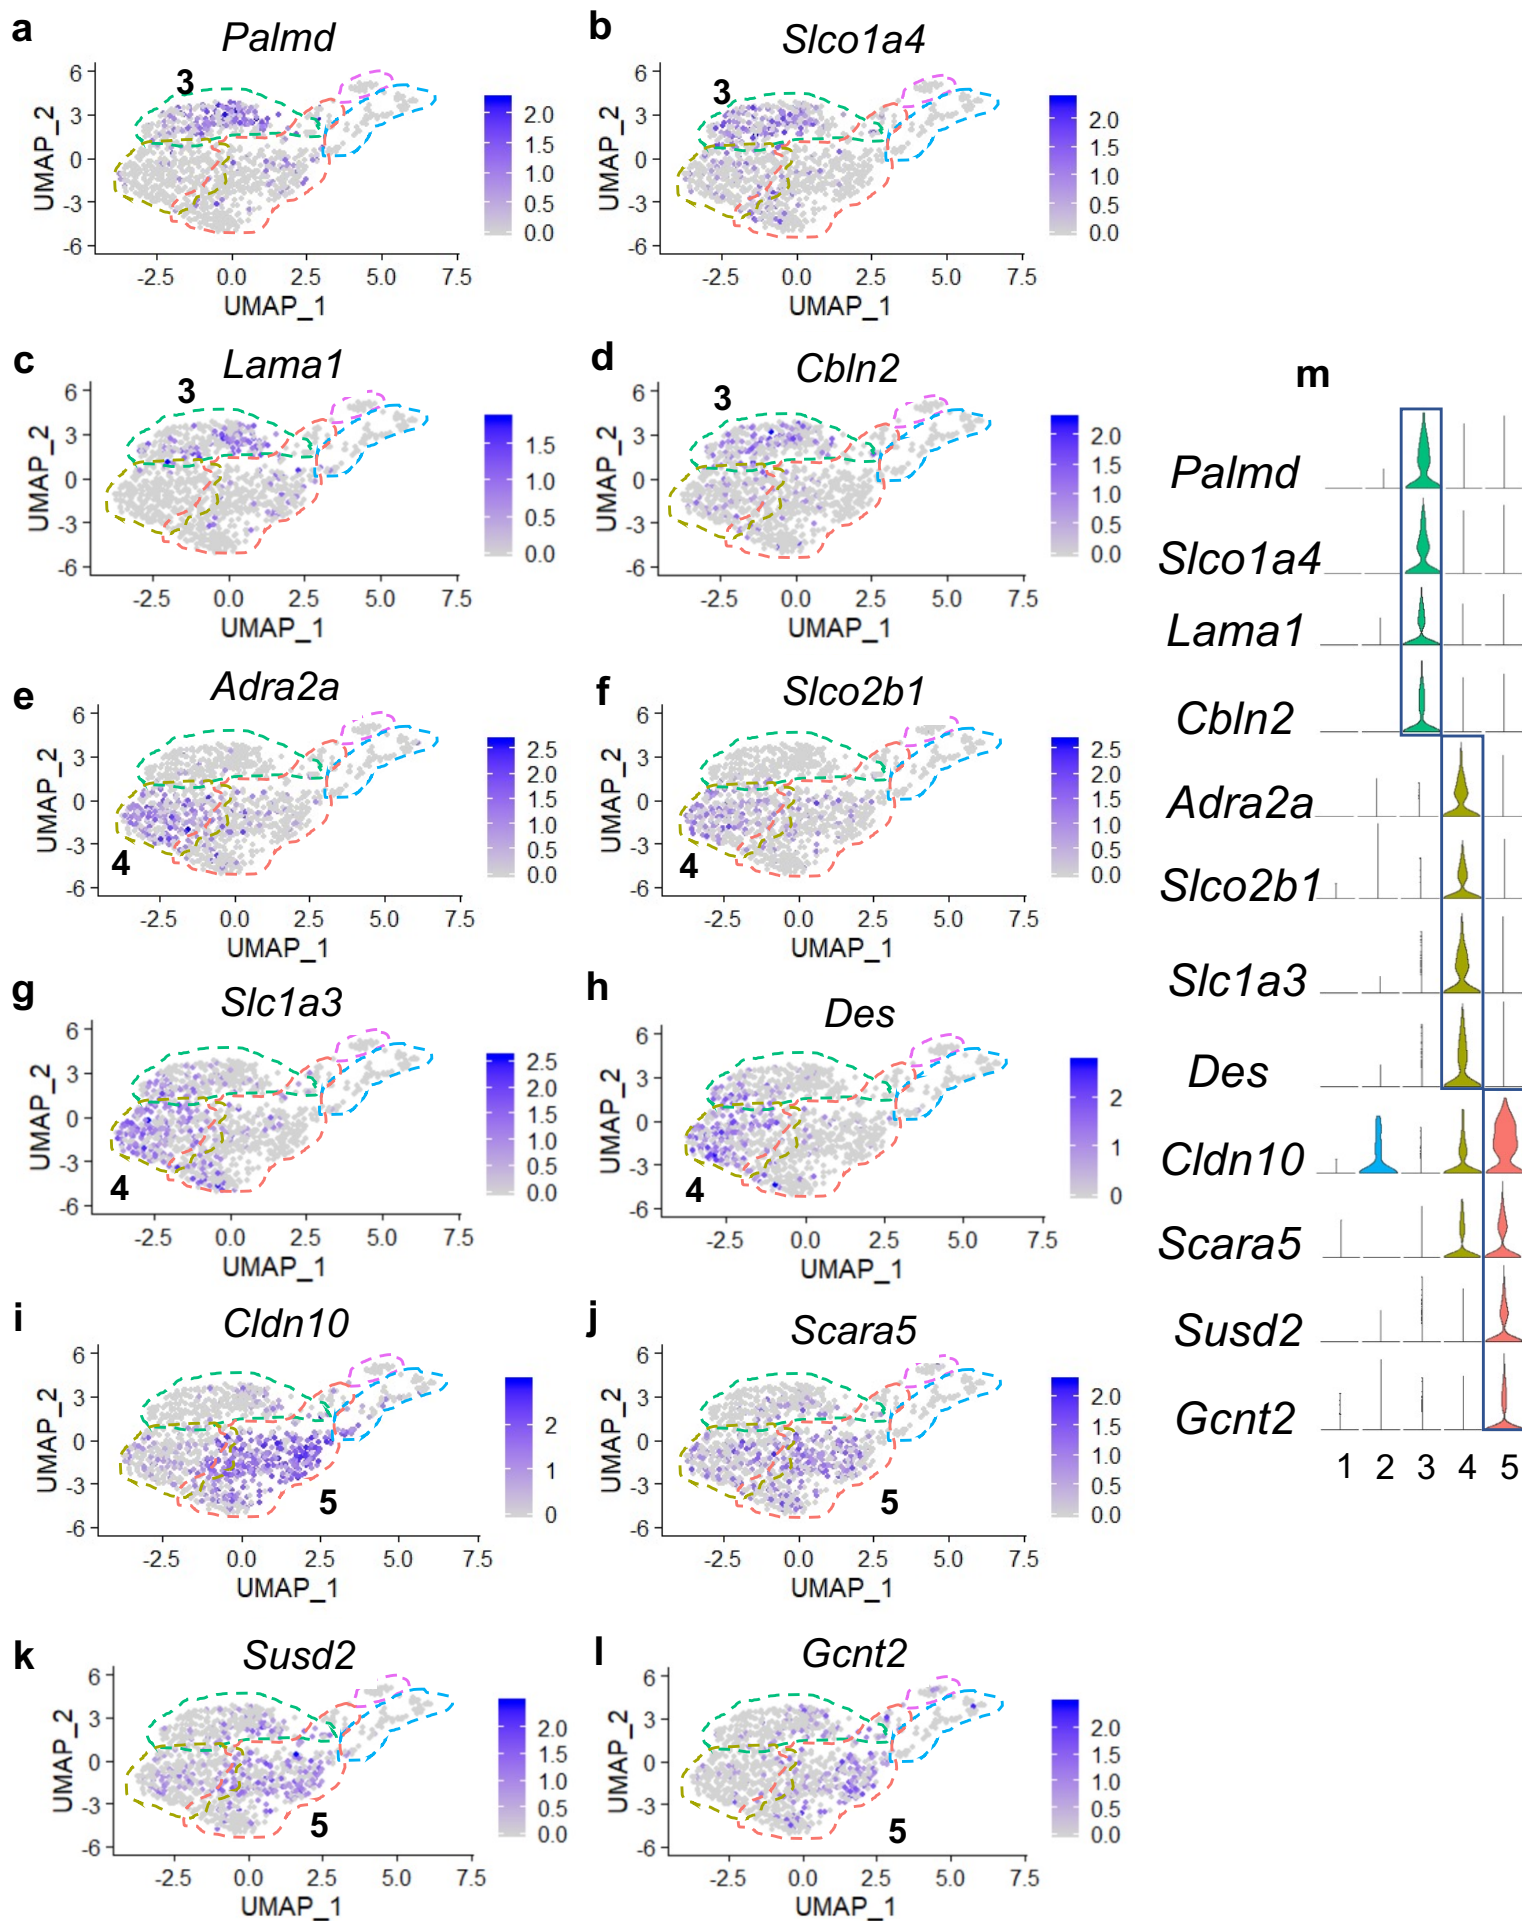

Supplement: supp [file elife-76932-supp-v1.zip › elife_poa_e76932_Figure_4_figure_supplement_3.pdf]

**a**

*LeprCre; Rosa26<sup>fs-tdTomato</sup>*

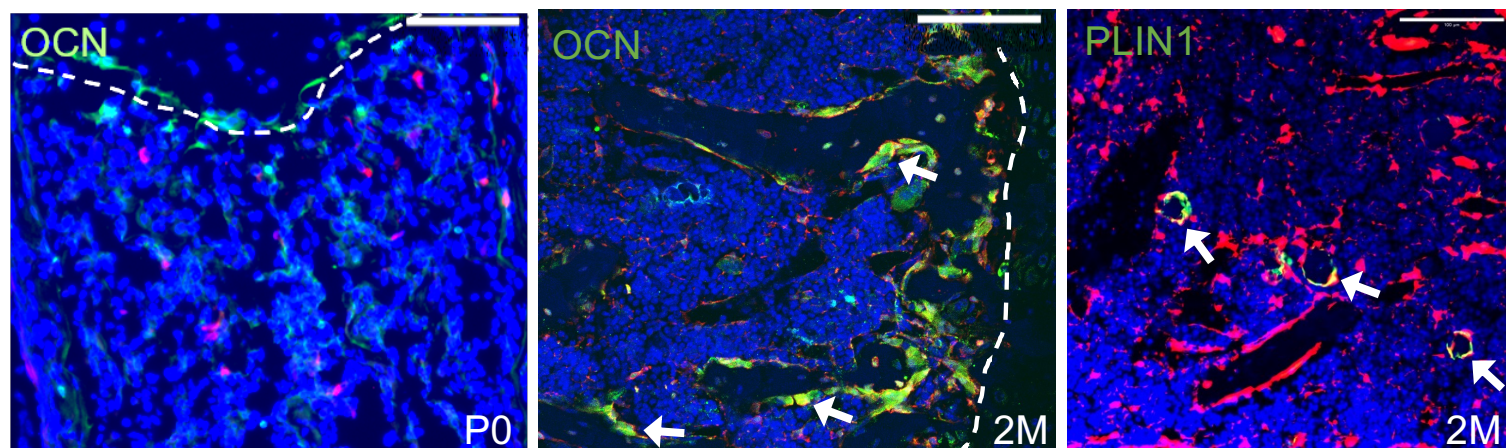

**b**

*AdipoqCre; Rosa26<sup>fs-tdTomato</sup>*

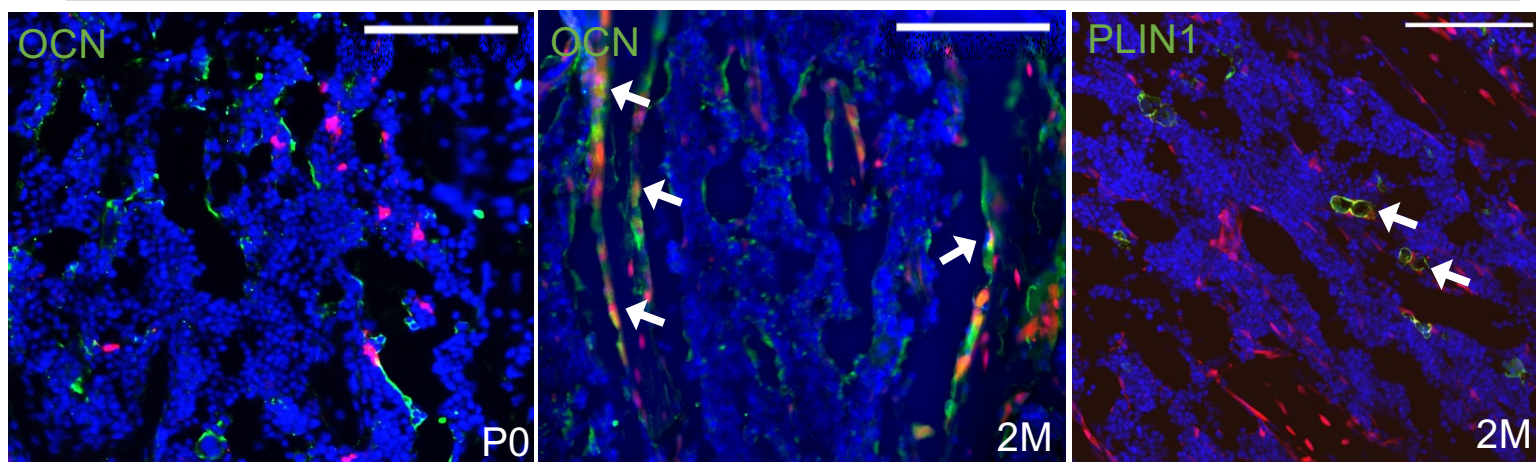

Supplement: supp [file elife-76932-supp-v1.zip › elife_poa_e76932_Figure_4_figure_supplement_4.pdf]

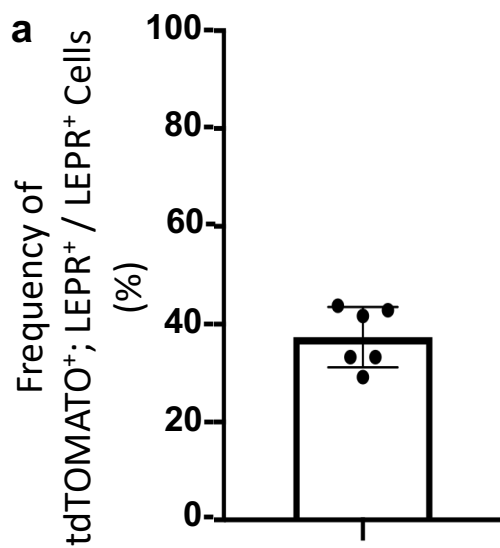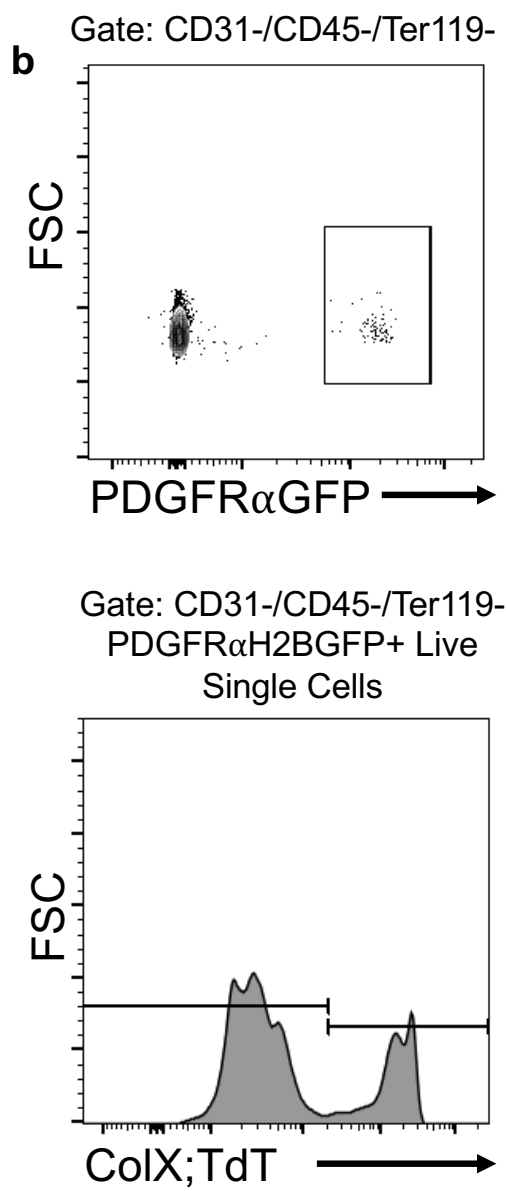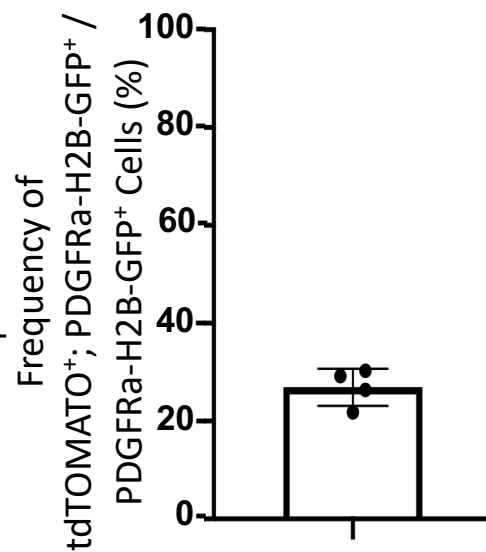

Supplement: supp [file elife-76932-supp-v1.zip › elife_poa_e76932_Figure_5_figure_supplement_1.pdf]

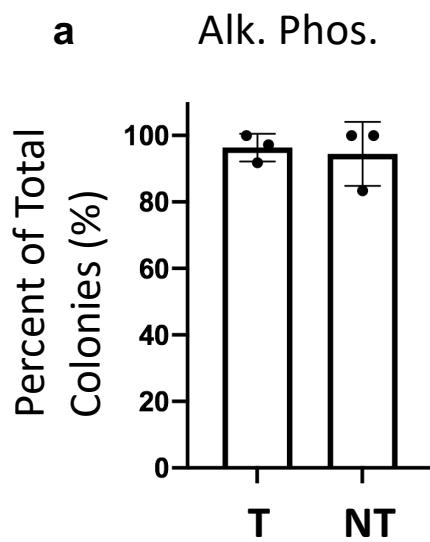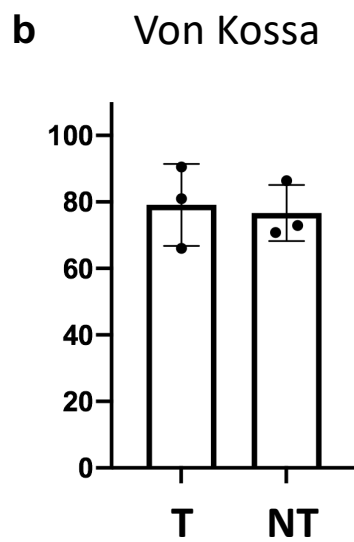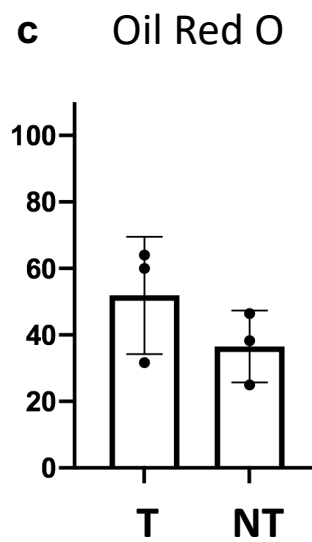

Supplement: supp [file elife-76932-supp-v1.zip › elife_poa_e76932_Figure_8_figure_supplement_1.pdf]
